# Supplementary material
Source: publisher figshare collection journal article supplement (https://acs.figshare.com/ndownloader/files/3617979)
Supplement: Supplementary file 1 [file 3617979]

 
data_sport
 
_audit_creation_method            SHELXL-2013
_chemical_name_systematic
;
 ?
;
_chemical_name_common             ?
_chemical_melting_point           'not determined' 
_chemical_formula_moiety          '[C24H26N4Rh][CoC4O4][C6H6]' 
_chemical_formula_sum
 'C34 H32 Co N4 O4 Rh' 
_chemical_formula_weight          722.47

loop_
 _atom_type_symbol
 _atom_type_description
 _atom_type_scat_dispersion_real
 _atom_type_scat_dispersion_imag
 _atom_type_scat_source
 'C'  'C'   0.0033   0.0016
 'International Tables Vol C Tables 4.2.6.8 and 6.1.1.4'
 'H'  'H'   0.0000   0.0000
 'International Tables Vol C Tables 4.2.6.8 and 6.1.1.4'
 'N'  'N'   0.0061   0.0033
 'International Tables Vol C Tables 4.2.6.8 and 6.1.1.4'
 'O'  'O'   0.0106   0.0060
 'International Tables Vol C Tables 4.2.6.8 and 6.1.1.4'
 'Co'  'Co'   0.3494   0.9721
 'International Tables Vol C Tables 4.2.6.8 and 6.1.1.4'
 'Rh'  'Rh'  -1.1178   0.9187
 'International Tables Vol C Tables 4.2.6.8 and 6.1.1.4'
 
_space_group_crystal_system       monoclinic
_space_group_IT_number            15
_space_group_name_H-M_alt         'C 2/c'
_space_group_name_Hall            '-C 2yc'
 
_shelx_space_group_comment
;
The symmetry employed for this shelxl refinement is uniquely defined
by the following loop, which should always be used as a source of
symmetry information in preference to the above space-group names.
They are only intended as comments.
;
 
loop_
 _space_group_symop_operation_xyz
 'x, y, z'
 '-x, y, -z+1/2'
 'x+1/2, y+1/2, z'
 '-x+1/2, y+1/2, -z+1/2'
 '-x, -y, -z'
 'x, -y, z-1/2'
 '-x+1/2, -y+1/2, -z'
 'x+1/2, -y+1/2, z-1/2'
 
_cell_length_a                    35.454(2)
_cell_length_b                    10.5231(7)
_cell_length_c                    17.9959(12)
_cell_angle_alpha                 90
_cell_angle_beta                  115.1940(10)
_cell_angle_gamma                 90
_cell_volume                      6075.3(7)
_cell_formula_units_Z             8
_cell_measurement_temperature     100(2)
_cell_measurement_reflns_used     6430 
_cell_measurement_theta_min       2.2725
_cell_measurement_theta_max       27.8725
 
_exptl_crystal_description        'block' 
_exptl_crystal_colour             'red'
_exptl_crystal_density_meas       ? 
_exptl_crystal_density_method     'not measured'              
_exptl_crystal_density_diffrn     1.580          
_exptl_crystal_F_000              2944
_exptl_transmission_factor_min    ?                                             
_exptl_transmission_factor_max    ?                                             
_exptl_crystal_size_max           0.125 
_exptl_crystal_size_mid           0.080
_exptl_crystal_size_min           0.040  
_exptl_absorpt_coefficient_mu     1.135
_shelx_estimated_absorpt_T_min    0.871 
_shelx_estimated_absorpt_T_max    0.956 
_exptl_absorpt_correction_type    'multi-scan' 
_exptl_absorpt_correction_T_min   0.6840 
_exptl_absorpt_correction_T_max   0.7456 
_exptl_absorpt_process_details    
;
28775 Corrected reflections written to file 
C:\Frames\guest\1150\work\mo_1150_0m.hkl
Estimated minimum and maximum transmission:  0.6840  0.7456
The ratio of these values is more reliable than their absolute values!
Additional spherical absorption correction applied with mu*r =  0.2000
Lambda/2 correction factor = 0.0015
;  
 
_exptl_special_details
; 
A sample crystal was selected and mounted on a MitEGen loop 
with Paratone N oil.  This crystal was indexed at 100K. 
; 
 
_diffrn_ambient_temperature       100(2)
_diffrn_radiation_wavelength      0.71073
_diffrn_radiation_type            MoK\a
_diffrn_radiation_source          'fine-focus sealed tube'             
_diffrn_measurement_device_type   'Kappa APX II DUO' 
_diffrn_measurement_method        'omega scans' 
_diffrn_detector_area_resol_mean  8.333 
_diffrn_reflns_number             27791
_diffrn_reflns_av_unetI/netI      0.0896
_diffrn_reflns_av_R_equivalents   0.0840
_diffrn_reflns_limit_h_min        -46
_diffrn_reflns_limit_h_max        46
_diffrn_reflns_limit_k_min        -13
_diffrn_reflns_limit_k_max        13
_diffrn_reflns_limit_l_min        -23
_diffrn_reflns_limit_l_max        23
_diffrn_reflns_theta_min          2.037
_diffrn_reflns_theta_max          28.010
_diffrn_reflns_theta_full         25.242
_diffrn_measured_fraction_theta_max   0.999
_diffrn_measured_fraction_theta_full  1.000
_diffrn_reflns_Laue_measured_fraction_max    0.999
_diffrn_reflns_Laue_measured_fraction_full   1.000
_diffrn_reflns_point_group_measured_fraction_max   0.999
_diffrn_reflns_point_group_measured_fraction_full  1.000
_reflns_number_total              7333
_reflns_number_gt                 4981
_reflns_threshold_expression      'I > 2\s(I)'
_reflns_Friedel_coverage          0.000
_reflns_Friedel_fraction_max      .
_reflns_Friedel_fraction_full     .
 
_reflns_special_details
;
 Reflections were merged by SHELXL according to the crystal
 class for the calculation of statistics and refinement.
 
 _reflns_Friedel_fraction is defined as the number of unique
 Friedel pairs measured divided by the number that would be
 possible theoretically, ignoring centric projections and
 systematic absences.
;
 
_computing_data_collection        'COSMO (Bruker-AXS)' 
_computing_cell_refinement        'SAINT (Bruker-AXS)'
_computing_data_reduction         'SADABS (Bruker-AXS)'
_computing_structure_solution     'SHELXL-2013 (Sheldrick, 2013)'
_computing_structure_refinement   'SHELXL-2013 (Sheldrick, 2013)'
_computing_molecular_graphics     'XP'
_computing_publication_material   'APEX2 report generator (Bruker-AXS)'
 
_refine_special_details
; 
 Refinement of F^2^ against ALL reflections.  The weighted R-factor wR and 
 goodness of fit S are based on F^2^, conventional R-factors R are based 
 on F, with F set to zero for negative F^2^. The threshold expression of 
 F^2^ > 2sigma(F^2^) is used only for calculating R-factors(gt) etc. and is 
 not relevant to the choice of reflections for refinement.  R-factors based 
 on F^2^ are statistically about twice as large as those based on F, and R- 
 factors based on ALL data will be even larger. 
;
_refine_ls_structure_factor_coef  Fsqd
_refine_ls_matrix_type            full
_refine_ls_weighting_scheme       calc
_refine_ls_weighting_details
;
 w=1/[\s^2^(Fo^2^)+(0.0263P)^2^]
 where P=(Fo^2^+2Fc^2^)/3
;
_atom_sites_solution_primary      ?
_atom_sites_solution_secondary    ?
_atom_sites_solution_hydrogens    geom
_refine_ls_hydrogen_treatment     constr
_refine_ls_extinction_method      none
_refine_ls_extinction_coef        .
_refine_ls_number_reflns          7333
_refine_ls_number_parameters      401
_refine_ls_number_restraints      0
_refine_ls_R_factor_all           0.0868
_refine_ls_R_factor_gt            0.0432
_refine_ls_wR_factor_ref          0.0774
_refine_ls_wR_factor_gt           0.0670
_refine_ls_goodness_of_fit_ref    0.982
_refine_ls_restrained_S_all       0.982
_refine_ls_shift/su_max           0.001
_refine_ls_shift/su_mean          0.000
 
loop_
 _atom_site_label
 _atom_site_type_symbol
 _atom_site_fract_x
 _atom_site_fract_y
 _atom_site_fract_z
 _atom_site_U_iso_or_equiv
 _atom_site_adp_type
 _atom_site_occupancy
 _atom_site_site_symmetry_order  
 _atom_site_calc_flag
 _atom_site_refinement_flags_posn
 _atom_site_refinement_flags_adp
 _atom_site_refinement_flags_occupancy
 _atom_site_disorder_assembly
 _atom_site_disorder_group
Rh1 Rh 0.57552(2) 0.45240(2) 0.91975(2) 0.01170(7) Uani 1 1 d . . . . .
Co1 Co 0.38368(2) 0.91883(4) 0.73215(3) 0.01630(12) Uani 1 1 d . . . . .
C17 C 0.41716(9) 0.4423(3) 0.72919(19) 0.0160(7) Uani 1 1 d . . . . .
H17 H 0.3904 0.4742 0.6937 0.019 Uiso 1 1 calc R U . . .
C5 C 0.72584(10) 0.4412(4) 0.9510(2) 0.0238(9) Uani 1 1 d . . . . .
H5 H 0.7496 0.4031 0.9488 0.029 Uiso 1 1 calc R U . . .
C2 C 0.65606(9) 0.5525(3) 0.95441(18) 0.0148(7) Uani 1 1 d . . . . .
C18 C 0.44933(9) 0.5258(3) 0.77387(19) 0.0139(7) Uani 1 1 d . . . . .
H18 H 0.4450 0.6148 0.7665 0.017 Uiso 1 1 calc R U . . .
C13 C 0.48763(9) 0.4795(3) 0.82897(19) 0.0131(7) Uani 1 1 d . . . . .
C15 C 0.46299(10) 0.2649(3) 0.7893(2) 0.0146(7) Uani 1 1 d . . . . .
H15 H 0.4677 0.1758 0.7917 0.018 Uiso 1 1 calc R U . . .
C3 C 0.68527(10) 0.6276(3) 0.9422(2) 0.0170(8) Uani 1 1 d . . . . .
H3 H 0.6809 0.7165 0.9339 0.020 Uiso 1 1 calc R U . . .
C1 C 0.66165(9) 0.4193(3) 0.96528(19) 0.0143(7) Uani 1 1 d . . . . .
C16 C 0.42438(10) 0.3125(3) 0.7369(2) 0.0189(8) Uani 1 1 d . . . . .
H16 H 0.4026 0.2556 0.7058 0.023 Uiso 1 1 calc R U . . .
C6 C 0.69691(10) 0.3658(3) 0.9626(2) 0.0206(8) Uani 1 1 d . . . . .
H6 H 0.7011 0.2766 0.9687 0.025 Uiso 1 1 calc R U . . .
C4 C 0.72060(10) 0.5718(3) 0.9424(2) 0.0230(9) Uani 1 1 d . . . . .
H4 H 0.7413 0.6229 0.9367 0.028 Uiso 1 1 calc R U . . .
C11 C 0.25744(12) 0.2092(4) 0.7894(2) 0.0356(10) Uani 1 1 d . . . . .
H11 H 0.2379 0.1439 0.7836 0.043 Uiso 1 1 calc R U . . .
C14 C 0.49511(9) 0.3460(3) 0.83880(19) 0.0136(7) Uani 1 1 d . . . . .
C10 C 0.25442(14) 0.3221(4) 0.8233(3) 0.0424(12) Uani 1 1 d . . . . .
H10 H 0.2331 0.3351 0.8414 0.051 Uiso 1 1 calc R U . . .
C9 C 0.28248(17) 0.4174(4) 0.8312(3) 0.0562(16) Uani 1 1 d . . . . .
H9 H 0.2811 0.4963 0.8556 0.067 Uiso 1 1 calc R U . . .
C7 C 0.31562(14) 0.2815(5) 0.7699(3) 0.0536(14) Uani 1 1 d . . . . .
H7 H 0.3366 0.2670 0.7514 0.064 Uiso 1 1 calc R U . . .
C8 C 0.31334(16) 0.3965(5) 0.8028(3) 0.0632(18) Uani 1 1 d . . . . .
H8 H 0.3324 0.4622 0.8064 0.076 Uiso 1 1 calc R U . . .
C12 C 0.28800(13) 0.1873(5) 0.7634(3) 0.0437(12) Uani 1 1 d . . . . .
H12 H 0.2899 0.1071 0.7411 0.052 Uiso 1 1 calc R U . . .
N4 N 0.52323(7) 0.5560(3) 0.87761(15) 0.0121(6) Uani 1 1 d . . . . .
N2 N 0.53556(8) 0.3093(3) 0.89459(16) 0.0130(6) Uani 1 1 d . . . . .
N1 N 0.62750(8) 0.3514(3) 0.96684(16) 0.0145(6) Uani 1 1 d . . . . .
N3 N 0.61661(8) 0.5957(3) 0.94838(16) 0.0136(6) Uani 1 1 d . . . . .
C20 C 0.57091(10) 0.6247(3) 1.04932(19) 0.0163(8) Uani 1 1 d . . . . .
H20A H 0.5959 0.6519 1.0983 0.020 Uiso 1 1 calc R U . . .
H20B H 0.5464 0.6351 1.0617 0.020 Uiso 1 1 calc R U . . .
C19 C 0.57544(10) 0.4830(3) 1.0322(2) 0.0172(8) Uani 1 1 d . . . . .
H19A H 0.5522 0.4347 1.0352 0.021 Uiso 1 1 calc R U . . .
H19B H 0.6018 0.4500 1.0755 0.021 Uiso 1 1 calc R U . . .
C25 C 0.48779(10) 0.7518(3) 0.8911(2) 0.0173(8) Uani 1 1 d . . . . .
H25A H 0.4815 0.8027 0.8416 0.026 Uiso 1 1 calc R U . . .
H25B H 0.4941 0.8083 0.9382 0.026 Uiso 1 1 calc R U . . .
H25C H 0.4636 0.6987 0.8832 0.026 Uiso 1 1 calc R U . . .
C22 C 0.60742(9) 0.7030(3) 0.97048(19) 0.0133(7) Uani 1 1 d . . . . .
C23 C 0.63694(10) 0.8108(3) 1.0073(2) 0.0183(8) Uani 1 1 d . . . . .
H23A H 0.6654 0.7779 1.0351 0.027 Uiso 1 1 calc R U . . .
H23B H 0.6296 0.8554 1.0471 0.027 Uiso 1 1 calc R U . . .
H23C H 0.6352 0.8699 0.9639 0.027 Uiso 1 1 calc R U . . .
C21 C 0.56557(9) 0.7122(3) 0.9751(2) 0.0143(7) Uani 1 1 d . . . . .
H21 H 0.5620 0.8016 0.9897 0.017 Uiso 1 1 calc R U . . .
C24 C 0.52459(9) 0.6688(3) 0.90670(19) 0.0129(7) Uani 1 1 d . . . . .
C29 C 0.54830(10) 0.1972(3) 0.9325(2) 0.0143(7) Uani 1 1 d . . . . .
C30 C 0.51792(10) 0.0926(3) 0.9262(2) 0.0188(8) Uani 1 1 d . . . . .
H30A H 0.4923 0.1299 0.9250 0.028 Uiso 1 1 calc R U . . .
H30B H 0.5305 0.0360 0.9737 0.028 Uiso 1 1 calc R U . . .
H30C H 0.5113 0.0439 0.8757 0.028 Uiso 1 1 calc R U . . .
C27 C 0.62772(10) 0.2373(3) 0.9990(2) 0.0163(8) Uani 1 1 d . . . . .
C28 C 0.59043(10) 0.1715(3) 0.9831(2) 0.0176(8) Uani 1 1 d . . . . .
H28 H 0.5946 0.0940 1.0126 0.021 Uiso 1 1 calc R U . . .
C26 C 0.66775(10) 0.1734(3) 1.0575(2) 0.0210(8) Uani 1 1 d . . . . .
H26A H 0.6769 0.1130 1.0271 0.031 Uiso 1 1 calc R U . . .
H26B H 0.6628 0.1281 1.1001 0.031 Uiso 1 1 calc R U . . .
H26C H 0.6894 0.2378 1.0831 0.031 Uiso 1 1 calc R U . . .
C34 C 0.36737(10) 0.7711(4) 0.7563(2) 0.0218(8) Uani 1 1 d . . . . .
C31 C 0.42335(11) 0.8966(3) 0.6993(2) 0.0206(8) Uani 1 1 d . . . . .
C33 C 0.34086(11) 0.9964(3) 0.6547(2) 0.0237(9) Uani 1 1 d . . . . .
C32 C 0.40198(10) 1.0121(3) 0.8220(2) 0.0176(8) Uani 1 1 d . . . . .
O1 O 0.44975(8) 0.8810(3) 0.67848(16) 0.0307(7) Uani 1 1 d . . . . .
O2 O 0.41410(7) 1.0734(2) 0.88083(15) 0.0260(6) Uani 1 1 d . . . . .
O4 O 0.35715(8) 0.6767(3) 0.77451(17) 0.0361(7) Uani 1 1 d . . . . .
O3 O 0.31311(8) 1.0489(3) 0.60448(16) 0.0407(7) Uani 1 1 d . . . . .
 
loop_
 _atom_site_aniso_label
 _atom_site_aniso_U_11
 _atom_site_aniso_U_22
 _atom_site_aniso_U_33
 _atom_site_aniso_U_23
 _atom_site_aniso_U_13
 _atom_site_aniso_U_12
Rh1 0.01136(11) 0.01057(14) 0.01363(12) 0.00031(12) 0.00576(9) -0.00012(11)
Co1 0.0171(2) 0.0160(3) 0.0155(2) -0.0008(2) 0.0066(2) 0.00012(19)
C17 0.0125(14) 0.024(2) 0.0123(16) 0.0012(15) 0.0058(13) 0.0003(15)
C5 0.0114(15) 0.034(3) 0.0252(19) 0.0063(18) 0.0072(15) 0.0069(16)
C2 0.0115(14) 0.021(2) 0.0120(15) -0.0006(15) 0.0047(13) 0.0004(15)
C18 0.0178(15) 0.012(2) 0.0140(16) 0.0032(14) 0.0091(14) 0.0032(14)
C13 0.0144(15) 0.015(2) 0.0121(16) -0.0004(14) 0.0076(13) -0.0006(13)
C15 0.0179(16) 0.0113(19) 0.0188(18) -0.0026(14) 0.0119(15) -0.0038(14)
C3 0.0183(16) 0.015(2) 0.0169(18) 0.0000(14) 0.0067(15) -0.0015(14)
C1 0.0145(15) 0.016(2) 0.0129(16) 0.0000(14) 0.0060(14) 0.0008(13)
C16 0.0185(17) 0.024(2) 0.0142(17) -0.0042(15) 0.0072(15) -0.0047(15)
C6 0.0172(17) 0.019(2) 0.0221(19) 0.0010(16) 0.0046(15) 0.0049(15)
C4 0.0183(17) 0.030(3) 0.0241(19) 0.0054(17) 0.0120(15) -0.0034(16)
C11 0.035(2) 0.037(3) 0.033(2) -0.011(2) 0.014(2) -0.013(2)
C14 0.0150(15) 0.017(2) 0.0123(16) 0.0006(14) 0.0094(14) -0.0001(14)
C10 0.045(3) 0.043(3) 0.034(3) 0.002(2) 0.012(2) 0.011(2)
C9 0.070(4) 0.024(3) 0.033(3) 0.005(2) -0.018(3) 0.012(3)
C7 0.032(2) 0.082(4) 0.044(3) 0.019(3) 0.013(2) -0.014(3)
C8 0.043(3) 0.044(3) 0.062(4) 0.034(3) -0.017(3) -0.024(3)
C12 0.036(2) 0.059(3) 0.036(3) -0.013(2) 0.015(2) -0.008(2)
N4 0.0138(12) 0.0110(16) 0.0132(13) 0.0001(12) 0.0073(11) 0.0001(12)
N2 0.0135(13) 0.0117(16) 0.0160(15) -0.0020(12) 0.0084(12) -0.0010(11)
N1 0.0134(13) 0.0141(16) 0.0159(15) -0.0008(12) 0.0062(12) 0.0009(12)
N3 0.0139(13) 0.0130(16) 0.0143(14) 0.0016(12) 0.0064(12) 0.0019(11)
C20 0.0197(17) 0.021(2) 0.0098(16) 0.0013(14) 0.0076(14) 0.0015(15)
C19 0.0223(17) 0.017(2) 0.0161(17) 0.0023(15) 0.0121(15) 0.0002(14)
C25 0.0173(16) 0.0113(19) 0.024(2) -0.0019(15) 0.0097(15) 0.0004(14)
C22 0.0151(16) 0.016(2) 0.0094(16) 0.0040(14) 0.0055(14) -0.0017(14)
C23 0.0205(17) 0.016(2) 0.0181(18) -0.0030(15) 0.0084(15) -0.0043(15)
C21 0.0146(16) 0.016(2) 0.0149(17) -0.0026(14) 0.0084(14) 0.0006(14)
C24 0.0163(16) 0.013(2) 0.0113(16) 0.0052(14) 0.0075(14) 0.0010(14)
C29 0.0189(16) 0.013(2) 0.0140(17) 0.0002(14) 0.0098(14) 0.0001(14)
C30 0.0237(18) 0.0100(19) 0.0222(19) 0.0015(15) 0.0093(16) -0.0011(14)
C27 0.0221(17) 0.014(2) 0.0138(17) 0.0014(15) 0.0083(15) 0.0041(15)
C28 0.0229(17) 0.0078(19) 0.0236(19) 0.0067(15) 0.0113(16) 0.0032(14)
C26 0.0189(17) 0.017(2) 0.025(2) 0.0056(16) 0.0069(16) 0.0035(15)
C34 0.0185(17) 0.020(2) 0.024(2) -0.0021(17) 0.0053(16) 0.0016(16)
C31 0.0222(18) 0.022(2) 0.0139(18) -0.0007(15) 0.0044(15) 0.0002(15)
C33 0.0264(19) 0.022(2) 0.024(2) 0.0016(17) 0.0116(17) 0.0020(16)
C32 0.0151(16) 0.021(2) 0.0204(19) 0.0036(16) 0.0113(15) -0.0028(14)
O1 0.0283(14) 0.0403(18) 0.0293(15) -0.0026(13) 0.0177(13) 0.0029(12)
O2 0.0286(13) 0.0282(17) 0.0223(14) -0.0077(12) 0.0119(11) -0.0072(12)
O4 0.0402(16) 0.0233(17) 0.0413(18) 0.0067(14) 0.0137(14) -0.0067(13)
O3 0.0353(15) 0.0474(19) 0.0303(16) 0.0126(15) 0.0053(13) 0.0142(15)
 
_geom_special_details
;
 All esds (except the esd in the dihedral angle between two l.s. planes)
 are estimated using the full covariance matrix.  The cell esds are taken
 into account individually in the estimation of esds in distances, angles
 and torsion angles; correlations between esds in cell parameters are only
 used when they are defined by crystal symmetry.  An approximate (isotropic)
 treatment of cell esds is used for estimating esds involving l.s. planes.
;
 
loop_
 _geom_bond_atom_site_label_1
 _geom_bond_atom_site_label_2
 _geom_bond_distance
 _geom_bond_site_symmetry_2
 _geom_bond_publ_flag
Rh1 N1 1.979(3) . ?
Rh1 N2 1.984(3) . ?
Rh1 N4 2.001(2) . ?
Rh1 N3 2.005(3) . ?
Rh1 C19 2.050(3) . ?
Co1 C31 1.757(4) . ?
Co1 C32 1.762(4) . ?
Co1 C33 1.764(4) . ?
Co1 C34 1.776(4) . ?
C17 C16 1.386(5) . ?
C17 C18 1.392(4) . ?
C5 C6 1.381(5) . ?
C5 C4 1.386(5) . ?
C2 C3 1.392(4) . ?
C2 C1 1.417(5) . ?
C2 N3 1.430(4) . ?
C18 C13 1.385(4) . ?
C13 C14 1.427(5) . ?
C13 N4 1.438(4) . ?
C15 C16 1.384(4) . ?
C15 C14 1.398(4) . ?
C3 C4 1.382(4) . ?
C1 C6 1.391(4) . ?
C1 N1 1.416(4) . ?
C11 C10 1.361(6) . ?
C11 C12 1.370(6) . ?
C14 N2 1.410(4) . ?
C10 C9 1.377(6) . ?
C9 C8 1.409(8) . ?
C7 C12 1.364(6) . ?
C7 C8 1.364(7) . ?
N4 C24 1.290(4) . ?
N2 C29 1.340(4) . ?
N1 C27 1.331(4) . ?
N3 C22 1.285(4) . ?
C20 C19 1.544(4) . ?
C20 C21 1.567(4) . ?
C25 C24 1.494(4) . ?
C22 C23 1.493(4) . ?
C22 C21 1.524(4) . ?
C21 C24 1.520(4) . ?
C29 C28 1.405(4) . ?
C29 C30 1.511(4) . ?
C27 C28 1.410(5) . ?
C27 C26 1.518(4) . ?
C34 O4 1.152(4) . ?
C31 O1 1.159(4) . ?
C33 O3 1.154(4) . ?
C32 O2 1.155(4) . ?
 
loop_
 _geom_angle_atom_site_label_1
 _geom_angle_atom_site_label_2
 _geom_angle_atom_site_label_3
 _geom_angle
 _geom_angle_site_symmetry_1
 _geom_angle_site_symmetry_3
 _geom_angle_publ_flag
N1 Rh1 N2 97.72(11) . . ?
N1 Rh1 N4 177.24(11) . . ?
N2 Rh1 N4 82.57(11) . . ?
N1 Rh1 N3 81.46(11) . . ?
N2 Rh1 N3 178.45(11) . . ?
N4 Rh1 N3 98.18(11) . . ?
N1 Rh1 C19 93.10(12) . . ?
N2 Rh1 C19 92.50(12) . . ?
N4 Rh1 C19 84.15(12) . . ?
N3 Rh1 C19 86.24(12) . . ?
C31 Co1 C32 110.35(15) . . ?
C31 Co1 C33 109.81(16) . . ?
C32 Co1 C33 108.90(16) . . ?
C31 Co1 C34 110.90(17) . . ?
C32 Co1 C34 107.08(16) . . ?
C33 Co1 C34 109.75(16) . . ?
C16 C17 C18 119.5(3) . . ?
C6 C5 C4 120.9(3) . . ?
C3 C2 C1 120.9(3) . . ?
C3 C2 N3 125.2(3) . . ?
C1 C2 N3 113.6(3) . . ?
C13 C18 C17 120.3(3) . . ?
C18 C13 C14 120.6(3) . . ?
C18 C13 N4 125.3(3) . . ?
C14 C13 N4 114.0(3) . . ?
C16 C15 C14 121.0(3) . . ?
C4 C3 C2 119.5(3) . . ?
C6 C1 N1 125.8(3) . . ?
C6 C1 C2 118.1(3) . . ?
N1 C1 C2 115.5(3) . . ?
C15 C16 C17 120.8(3) . . ?
C5 C6 C1 120.6(3) . . ?
C3 C4 C5 120.0(3) . . ?
C10 C11 C12 121.6(4) . . ?
C15 C14 N2 126.3(3) . . ?
C15 C14 C13 117.6(3) . . ?
N2 C14 C13 115.9(3) . . ?
C11 C10 C9 119.4(5) . . ?
C10 C9 C8 119.2(5) . . ?
C12 C7 C8 120.6(5) . . ?
C7 C8 C9 119.6(4) . . ?
C7 C12 C11 119.5(5) . . ?
C24 N4 C13 129.3(3) . . ?
C24 N4 Rh1 118.6(2) . . ?
C13 N4 Rh1 110.9(2) . . ?
C29 N2 C14 128.6(3) . . ?
C29 N2 Rh1 119.9(2) . . ?
C14 N2 Rh1 111.5(2) . . ?
C27 N1 C1 128.1(3) . . ?
C27 N1 Rh1 120.2(2) . . ?
C1 N1 Rh1 111.6(2) . . ?
C22 N3 C2 128.7(3) . . ?
C22 N3 Rh1 119.2(2) . . ?
C2 N3 Rh1 111.1(2) . . ?
C19 C20 C21 112.5(3) . . ?
C20 C19 Rh1 113.1(2) . . ?
N3 C22 C23 125.7(3) . . ?
N3 C22 C21 117.0(3) . . ?
C23 C22 C21 116.3(3) . . ?
C24 C21 C22 123.7(3) . . ?
C24 C21 C20 103.9(3) . . ?
C22 C21 C20 104.0(3) . . ?
N4 C24 C25 125.6(3) . . ?
N4 C24 C21 117.5(3) . . ?
C25 C24 C21 115.7(3) . . ?
N2 C29 C28 122.3(3) . . ?
N2 C29 C30 121.9(3) . . ?
C28 C29 C30 115.8(3) . . ?
N1 C27 C28 121.5(3) . . ?
N1 C27 C26 122.2(3) . . ?
C28 C27 C26 116.2(3) . . ?
C29 C28 C27 133.1(3) . . ?
O4 C34 Co1 177.8(3) . . ?
O1 C31 Co1 179.2(3) . . ?
O3 C33 Co1 179.0(4) . . ?
O2 C32 Co1 179.7(3) . . ?
 
loop_
 _geom_torsion_atom_site_label_1
 _geom_torsion_atom_site_label_2
 _geom_torsion_atom_site_label_3
 _geom_torsion_atom_site_label_4
 _geom_torsion
 _geom_torsion_site_symmetry_1
 _geom_torsion_site_symmetry_2
 _geom_torsion_site_symmetry_3
 _geom_torsion_site_symmetry_4
 _geom_torsion_publ_flag
C16 C17 C18 C13 -3.5(5) . . . . ?
C17 C18 C13 C14 2.0(5) . . . . ?
C17 C18 C13 N4 179.2(3) . . . . ?
C1 C2 C3 C4 -1.3(5) . . . . ?
N3 C2 C3 C4 -174.1(3) . . . . ?
C3 C2 C1 C6 -0.7(5) . . . . ?
N3 C2 C1 C6 172.9(3) . . . . ?
C3 C2 C1 N1 -172.4(3) . . . . ?
N3 C2 C1 N1 1.1(4) . . . . ?
C14 C15 C16 C17 3.1(5) . . . . ?
C18 C17 C16 C15 0.9(5) . . . . ?
C4 C5 C6 C1 0.5(5) . . . . ?
N1 C1 C6 C5 171.9(3) . . . . ?
C2 C1 C6 C5 1.1(5) . . . . ?
C2 C3 C4 C5 2.9(5) . . . . ?
C6 C5 C4 C3 -2.6(5) . . . . ?
C16 C15 C14 N2 179.8(3) . . . . ?
C16 C15 C14 C13 -4.4(5) . . . . ?
C18 C13 C14 C15 1.9(5) . . . . ?
N4 C13 C14 C15 -175.6(3) . . . . ?
C18 C13 C14 N2 178.1(3) . . . . ?
N4 C13 C14 N2 0.7(4) . . . . ?
C12 C11 C10 C9 0.6(7) . . . . ?
C11 C10 C9 C8 1.0(6) . . . . ?
C12 C7 C8 C9 0.8(7) . . . . ?
C10 C9 C8 C7 -1.7(7) . . . . ?
C8 C7 C12 C11 0.7(7) . . . . ?
C10 C11 C12 C7 -1.5(7) . . . . ?
C18 C13 N4 C24 30.5(5) . . . . ?
C14 C13 N4 C24 -152.2(3) . . . . ?
C18 C13 N4 Rh1 -161.9(3) . . . . ?
C14 C13 N4 Rh1 15.4(3) . . . . ?
C15 C14 N2 C29 -24.0(5) . . . . ?
C13 C14 N2 C29 160.1(3) . . . . ?
C15 C14 N2 Rh1 159.2(3) . . . . ?
C13 C14 N2 Rh1 -16.6(3) . . . . ?
C6 C1 N1 C27 30.6(5) . . . . ?
C2 C1 N1 C27 -158.4(3) . . . . ?
C6 C1 N1 Rh1 -153.4(3) . . . . ?
C2 C1 N1 Rh1 17.6(3) . . . . ?
C3 C2 N3 C22 -37.4(5) . . . . ?
C1 C2 N3 C22 149.4(3) . . . . ?
C3 C2 N3 Rh1 154.2(3) . . . . ?
C1 C2 N3 Rh1 -19.0(3) . . . . ?
C21 C20 C19 Rh1 2.4(3) . . . . ?
C2 N3 C22 C23 1.2(5) . . . . ?
Rh1 N3 C22 C23 168.8(2) . . . . ?
C2 N3 C22 C21 -166.3(3) . . . . ?
Rh1 N3 C22 C21 1.3(4) . . . . ?
N3 C22 C21 C24 -49.2(4) . . . . ?
C23 C22 C21 C24 142.2(3) . . . . ?
N3 C22 C21 C20 68.5(3) . . . . ?
C23 C22 C21 C20 -100.1(3) . . . . ?
C19 C20 C21 C24 63.6(3) . . . . ?
C19 C20 C21 C22 -67.0(3) . . . . ?
C13 N4 C24 C25 -4.3(5) . . . . ?
Rh1 N4 C24 C25 -171.1(2) . . . . ?
C13 N4 C24 C21 163.2(3) . . . . ?
Rh1 N4 C24 C21 -3.5(4) . . . . ?
C22 C21 C24 N4 50.7(4) . . . . ?
C20 C21 C24 N4 -67.0(4) . . . . ?
C22 C21 C24 C25 -140.5(3) . . . . ?
C20 C21 C24 C25 101.8(3) . . . . ?
C14 N2 C29 C28 176.0(3) . . . . ?
Rh1 N2 C29 C28 -7.5(4) . . . . ?
C14 N2 C29 C30 -6.7(5) . . . . ?
Rh1 N2 C29 C30 169.9(2) . . . . ?
C1 N1 C27 C28 -168.3(3) . . . . ?
Rh1 N1 C27 C28 16.0(4) . . . . ?
C1 N1 C27 C26 14.4(5) . . . . ?
Rh1 N1 C27 C26 -161.3(2) . . . . ?
N2 C29 C28 C27 -9.1(6) . . . . ?
C30 C29 C28 C27 173.4(4) . . . . ?
N1 C27 C28 C29 4.2(6) . . . . ?
C26 C27 C28 C29 -178.4(4) . . . . ?
 
_refine_diff_density_max    0.549
_refine_diff_density_min   -0.556
_refine_diff_density_rms    0.118

_shelxl_version_number 2013-2

_shelx_res_file
;
TITL sport in C2/c
CELL 0.71073  35.4540  10.5231  17.9959  90.000 115.194  90.000
ZERR   8.00   0.0023   0.0007   0.0012   0.000   0.001   0.000
LATT 7
SYMM -X, Y, 0.5-Z
SFAC C  H  N  O  Co Rh
UNIT 272  256  32  32  8  8
ACTA
CONF
L.S. 10
BOND
FMAP 2
PLAN 20
TEMP -173.100
WGHT    0.026300
FVAR       0.04820
MOLE 1
RH1   6    0.575523    0.452403    0.919746    11.00000    0.01136    0.01057 =
         0.01363    0.00031    0.00576   -0.00012
CO1   5    0.383684    0.918826    0.732150    11.00000    0.01710    0.01599 =
         0.01549   -0.00081    0.00662    0.00012
C17   1    0.417157    0.442333    0.729187    11.00000    0.01254    0.02377 =
         0.01233    0.00117    0.00580    0.00030
AFIX  43
H17   2    0.390440    0.474153    0.693667    11.00000   -1.20000
AFIX   0
C5    1    0.725837    0.441229    0.950967    11.00000    0.01138    0.03405 =
         0.02522    0.00626    0.00717    0.00694
AFIX  43
H5    2    0.749641    0.403121    0.948807    11.00000   -1.20000
AFIX   0
C2    1    0.656057    0.552463    0.954406    11.00000    0.01153    0.02050 =
         0.01205   -0.00056    0.00472    0.00039
C18   1    0.449326    0.525756    0.773866    11.00000    0.01783    0.01231 =
         0.01397    0.00323    0.00908    0.00320
AFIX  43
H18   2    0.444991    0.614837    0.766535    11.00000   -1.20000
AFIX   0
C13   1    0.487631    0.479472    0.828969    11.00000    0.01438    0.01494 =
         0.01213   -0.00036    0.00761   -0.00062
C15   1    0.462986    0.264897    0.789312    11.00000    0.01793    0.01131 =
         0.01880   -0.00255    0.01190   -0.00380
AFIX  43
H15   2    0.467724    0.175823    0.791706    11.00000   -1.20000
AFIX   0
C3    1    0.685269    0.627608    0.942245    11.00000    0.01831    0.01493 =
         0.01687    0.00001    0.00670   -0.00150
AFIX  43
H3    2    0.680948    0.716549    0.933874    11.00000   -1.20000
AFIX   0
C1    1    0.661651    0.419303    0.965277    11.00000    0.01448    0.01556 =
         0.01295    0.00002    0.00605    0.00082
C16   1    0.424378    0.312536    0.736881    11.00000    0.01846    0.02435 =
         0.01424   -0.00421    0.00718   -0.00474
AFIX  43
H16   2    0.402561    0.255550    0.705789    11.00000   -1.20000
AFIX   0
C6    1    0.696914    0.365807    0.962551    11.00000    0.01718    0.01865 =
         0.02210    0.00102    0.00458    0.00490
AFIX  43
H6    2    0.701139    0.276566    0.968714    11.00000   -1.20000
AFIX   0
C4    1    0.720605    0.571784    0.942448    11.00000    0.01826    0.02979 =
         0.02409    0.00539    0.01199   -0.00341
AFIX  43
H4    2    0.741304    0.622901    0.936749    11.00000   -1.20000
AFIX   0
C11   1    0.257437    0.209158    0.789413    11.00000    0.03527    0.03735 =
         0.03348   -0.01097    0.01402   -0.01328
AFIX  43
H11   2    0.237867    0.143876    0.783604    11.00000   -1.20000
AFIX   0
C14   1    0.495114    0.345962    0.838801    11.00000    0.01498    0.01740 =
         0.01228    0.00059    0.00942   -0.00007
C10   1    0.254422    0.322087    0.823326    11.00000    0.04517    0.04288 =
         0.03416    0.00177    0.01214    0.01069
AFIX  43
H10   2    0.233136    0.335052    0.841381    11.00000   -1.20000
AFIX   0
C9    1    0.282484    0.417385    0.831244    11.00000    0.06993    0.02435 =
         0.03303    0.00467   -0.01777    0.01197
AFIX  43
H9    2    0.281059    0.496254    0.855610    11.00000   -1.20000
AFIX   0
C7    1    0.315622    0.281548    0.769911    11.00000    0.03167    0.08212 =
         0.04373    0.01935    0.01277   -0.01382
AFIX  43
H7    2    0.336649    0.267013    0.751361    11.00000   -1.20000
AFIX   0
C8    1    0.313338    0.396529    0.802779    11.00000    0.04267    0.04406 =
         0.06167    0.03429   -0.01728   -0.02374
AFIX  43
H8    2    0.332450    0.462169    0.806448    11.00000   -1.20000
AFIX   0
C12   1    0.287999    0.187300    0.763444    11.00000    0.03569    0.05900 =
         0.03637   -0.01344    0.01519   -0.00802
AFIX  43
H12   2    0.289935    0.107082    0.741097    11.00000   -1.20000
AFIX   0
N4    3    0.523234    0.556019    0.877614    11.00000    0.01379    0.01098 =
         0.01321    0.00014    0.00727    0.00009
N2    3    0.535556    0.309268    0.894593    11.00000    0.01347    0.01170 =
         0.01604   -0.00199    0.00841   -0.00100
N1    3    0.627505    0.351367    0.966841    11.00000    0.01340    0.01406 =
         0.01591   -0.00080    0.00620    0.00091
N3    3    0.616615    0.595651    0.948379    11.00000    0.01391    0.01295 =
         0.01427    0.00156    0.00642    0.00188
C20   1    0.570913    0.624676    1.049319    11.00000    0.01974    0.02087 =
         0.00979    0.00127    0.00763    0.00150
AFIX  23
H20A  2    0.595916    0.651888    1.098330    11.00000   -1.20000
H20B  2    0.546415    0.635088    1.061666    11.00000   -1.20000
AFIX   0
C19   1    0.575440    0.483022    1.032187    11.00000    0.02231    0.01736 =
         0.01608    0.00231    0.01211    0.00022
AFIX  23
H19A  2    0.552173    0.434712    1.035210    11.00000   -1.20000
H19B  2    0.601769    0.450010    1.075497    11.00000   -1.20000
AFIX   0
C25   1    0.487788    0.751769    0.891072    11.00000    0.01734    0.01134 =
         0.02409   -0.00188    0.00971    0.00039
AFIX 137
H25A  2    0.481515    0.802749    0.841631    11.00000   -1.50000
H25B  2    0.494054    0.808250    0.938160    11.00000   -1.50000
H25C  2    0.463650    0.698738    0.883172    11.00000   -1.50000
AFIX   0
C22   1    0.607419    0.703040    0.970476    11.00000    0.01505    0.01566 =
         0.00937    0.00397    0.00546   -0.00166
C23   1    0.636937    0.810802    1.007302    11.00000    0.02049    0.01633 =
         0.01809   -0.00302    0.00836   -0.00429
AFIX 137
H23A  2    0.665424    0.777865    1.035134    11.00000   -1.50000
H23B  2    0.629564    0.855393    1.047085    11.00000   -1.50000
H23C  2    0.635194    0.869871    0.963854    11.00000   -1.50000
AFIX   0
C21   1    0.565567    0.712178    0.975056    11.00000    0.01460    0.01561 =
         0.01493   -0.00263    0.00845    0.00057
AFIX  13
H21   2    0.561958    0.801589    0.989719    11.00000   -1.20000
AFIX   0
C24   1    0.524592    0.668800    0.906701    11.00000    0.01630    0.01288 =
         0.01130    0.00515    0.00755    0.00101
C29   1    0.548304    0.197225    0.932474    11.00000    0.01887    0.01298 =
         0.01403    0.00020    0.00984    0.00006
C30   1    0.517920    0.092581    0.926160    11.00000    0.02373    0.01001 =
         0.02220    0.00151    0.00934   -0.00107
AFIX 137
H30A  2    0.492345    0.129877    0.924987    11.00000   -1.50000
H30B  2    0.530452    0.036029    0.973723    11.00000   -1.50000
H30C  2    0.511252    0.043944    0.875675    11.00000   -1.50000
AFIX   0
C27   1    0.627724    0.237336    0.998995    11.00000    0.02206    0.01370 =
         0.01380    0.00139    0.00834    0.00409
C28   1    0.590430    0.171530    0.983071    11.00000    0.02295    0.00784 =
         0.02359    0.00672    0.01132    0.00321
AFIX  43
H28   2    0.594632    0.093983    1.012565    11.00000   -1.20000
AFIX   0
C26   1    0.667746    0.173387    1.057521    11.00000    0.01887    0.01690 =
         0.02475    0.00559    0.00692    0.00351
AFIX 137
H26A  2    0.676871    0.112957    1.027066    11.00000   -1.50000
H26B  2    0.662815    0.128074    1.100143    11.00000   -1.50000
H26C  2    0.689395    0.237835    1.083148    11.00000   -1.50000
AFIX   0
C34   1    0.367365    0.771150    0.756304    11.00000    0.01846    0.01952 =
         0.02350   -0.00207    0.00530    0.00160
C31   1    0.423347    0.896629    0.699345    11.00000    0.02216    0.02242 =
         0.01388   -0.00073    0.00438    0.00024
C33   1    0.340860    0.996419    0.654723    11.00000    0.02641    0.02174 =
         0.02386    0.00156    0.01160    0.00201
C32   1    0.401979    1.012066    0.822015    11.00000    0.01505    0.02126 =
         0.02040    0.00362    0.01129   -0.00276
O1    4    0.449746    0.880952    0.678481    11.00000    0.02826    0.04031 =
         0.02926   -0.00261    0.01767    0.00292
O2    4    0.414098    1.073360    0.880828    11.00000    0.02864    0.02819 =
         0.02228   -0.00768    0.01194   -0.00724
O4    4    0.357154    0.676695    0.774513    11.00000    0.04018    0.02326 =
         0.04126    0.00668    0.01374   -0.00674
O3    4    0.313115    1.048891    0.604479    11.00000    0.03527    0.04742 =
         0.03033    0.01259    0.00531    0.01416
HKLF 4

REM  sport in C2/c
REM R1 =  0.0432 for    4981 Fo > 4sig(Fo)  and  0.0868 for all    7333 data
REM    401 parameters refined using      0 restraints

END

WGHT      0.0263      0.0000

REM Highest difference peak  0.549,  deepest hole -0.556,  1-sigma level  0.118
Q1    1   0.3596  0.9964  0.6974  11.00000  0.05    0.55
Q2    1   0.6207  0.7468  1.0045  11.00000  0.05    0.51
Q3    1   0.3420  0.5039  0.8835  11.00000  0.05    0.50
Q4    1   0.5882  0.6924  0.9791  11.00000  0.05    0.50
Q5    1   0.3096  0.4679  0.8301  11.00000  0.05    0.49
Q6    1   0.4079  0.9096  0.7277  11.00000  0.05    0.48
Q7    1   0.6002  0.4323  0.9172  11.00000  0.05    0.48
Q8    1   0.5499  0.5399  0.8831  11.00000  0.05    0.46
Q9    1   0.3816  1.0451  0.6669  11.00000  0.05    0.46
Q10   1   0.6373  0.5996  0.9482  11.00000  0.05    0.46
Q11   1   0.3849  0.9529  0.6419  11.00000  0.05    0.44
Q12   1   0.4132  0.3883  0.7094  11.00000  0.05    0.44
Q13   1   0.5971  0.3818  0.9716  11.00000  0.05    0.43
Q14   1   0.5877  0.4924  1.0082  11.00000  0.05    0.43
Q15   1   0.7104  0.6189  0.9728  11.00000  0.05    0.43
Q16   1   0.7602  0.5829  0.9519  11.00000  0.05    0.43
Q17   1   0.6643  0.4849  0.9758  11.00000  0.05    0.43
Q18   1   0.6146  0.0349  1.0459  11.00000  0.05    0.43
Q19   1   0.5526  0.4832  0.9323  11.00000  0.05    0.42
Q20   1   0.2817  0.4216  0.8620  11.00000  0.05    0.42
;
_shelx_res_checksum   86220

_shelx_hkl_file
;
  -4   0   0  275.88    4.91
   4   0   0  267.95    4.46
   4   0   0  270.09    5.16
  -6   0   0  277.67    5.57
   6   0   0  272.56    5.61
  -6   0   0  271.11    5.17
   8   0   0   56.12    2.25
   8   0   0   54.33    2.91
 -10   0   0   20.44    2.55
  10   0   0   20.85    1.90
  10   0   0   25.86    2.39
 -12   0   0   50.20    2.87
  12   0   0   54.20    2.96
  12   0   0   46.29    2.33
 -14   0   0   47.95    3.31
  14   0   0   49.35    2.54
  14   0   0   53.08    3.37
  16   0   0   70.91    3.61
 -16   0   0   68.41    3.50
  16   0   0   69.67    2.88
 -18   0   0   30.86    2.94
  18   0   0   35.20    2.65
 -20   0   0  272.52    7.55
 -20   0   0  256.44    7.46
  20   0   0  267.72    6.00
  22   0   0   69.93    3.32
 -22   0   0   65.88    4.32
 -22   0   0   78.92    4.20
 -24   0   0   25.83    3.52
  24   0   0   34.62    2.77
  24   0   0   27.04    2.92
 -24   0   0   34.00    3.48
 -26   0   0  176.82    6.72
 -26   0   0  180.84    6.92
  26   0   0  182.75    5.25
  26   0   0  185.34    5.51
 -28   0   0   14.77    3.15
  28   0   0   17.57    2.52
 -28   0   0   17.13    3.12
  28   0   0   14.14    2.36
  30   0   0   41.89    3.40
 -30   0   0   47.08    4.24
 -30   0   0   48.83    4.57
  32   0   0   30.84    3.22
 -32   0   0   41.71    4.64
 -32   0   0   37.30    4.15
 -34   0   0   44.91    5.02
 -34   0   0   55.85    4.84
 -36   0   0    5.83    3.23
 -36   0   0   -2.83    2.81
 -38   0   0   11.26    3.83
 -38   0   0    8.10    3.32
 -40   0   0   12.27    3.94
 -40   0   0    7.25    3.39
 -42   0   0   13.85    4.02
 -42   0   0   19.69    4.58
  -1  -1   0  313.81    5.17
   1  -1   0  308.27    5.63
   1  -1   0  311.80    5.15
   1  -1   0  305.74    5.26
   1   1   0  311.60    5.82
  -1   1   0  314.69    5.64
  -1   1   0  312.29    5.14
   1   1   0  313.79    5.29
  -1   1   0  307.14    5.25
   3  -1   0   28.86    1.37
  -3   1   0   31.07    1.26
   3   1   0   30.03    1.43
  -3   1   0   30.63    1.26
  -3   1   0   32.07    1.06
   3   1   0   32.36    1.72
  -5  -1   0   14.16    1.78
   5  -1   0   16.02    1.60
   5   1   0   13.14    1.94
  -5   1   0   18.46    1.55
   5   1   0   14.18    1.91
   7  -1   0  366.71    6.67
  -7  -1   0  366.52    7.18
   7   1   0  354.86    5.70
   7   1   0  371.66    7.44
   7   1   0  373.58    7.39
  -7   1   0  372.59    7.13
  -9  -1   0   84.44    3.31
   9  -1   0   87.14    2.81
   9   1   0   83.64    3.12
  -9   1   0   86.56    3.26
   9   1   0   84.70    3.27
   9   1   0   83.80    2.11
  11  -1   0    4.48    1.50
 -11  -1   0    5.03    1.68
  11   1   0    5.71    1.78
 -11   1   0    5.63    0.79
 -11   1   0    4.20    1.57
  11   1   0    5.30    1.01
 -13  -1   0  410.97    8.81
  13  -1   0  415.59    7.91
 -13   1   0  419.84    8.85
  13   1   0  417.01    7.10
  13   1   0  415.49    9.08
 -15  -1   0   87.23    3.75
  15  -1   0   90.81    3.48
 -15   1   0   82.23    3.78
  15   1   0   94.05    2.77
 -15   1   0   87.15    3.98
  15   1   0   89.59    4.13
 -17  -1   0   27.10    2.83
  17  -1   0   27.75    2.64
  17   1   0   33.34    2.15
 -17   1   0   35.21    2.98
 -17   1   0   30.95    2.82
  17   1   0   31.21    2.93
 -19  -1   0  127.18    4.94
  19  -1   0  130.05    4.28
 -19   1   0  133.42    5.05
  19   1   0  141.28    3.60
  19   1   0  135.62    5.14
 -19   1   0  142.92    5.07
 -21  -1   0   58.91    3.75
  21  -1   0   54.72    3.22
 -21   1   0   57.48    3.77
  21   1   0   59.16    2.68
 -21   1   0   65.12    4.00
  21   1   0   52.26    2.57
  21   1   0   60.45    3.83
  23  -1   0    1.70    1.97
 -23  -1   0   -0.96    1.91
 -23  -1   0   -1.47    2.10
 -23   1   0    3.42    2.05
  23   1   0   -1.37    1.46
 -23   1   0   -0.09    1.94
  23   1   0    2.31    1.34
 -25  -1   0   13.08    2.65
 -25  -1   0    9.16    2.58
  25  -1   0   15.30    2.44
  25  -1   0   13.77    2.39
  25   1   0   12.27    1.85
 -25   1   0   12.60    2.77
  25   1   0    9.47    1.80
 -25   1   0   10.91    2.59
  27  -1   0   75.81    4.19
 -27  -1   0   71.58    4.68
 -27  -1   0   70.19    4.94
  27  -1   0   69.13    3.86
 -27   1   0   78.24    4.75
 -27   1   0   72.44    4.89
 -29  -1   0    9.25    3.03
  29  -1   0   18.34    2.72
 -29  -1   0   11.42    3.23
  29  -1   0   15.21    2.72
 -29   1   0   10.35    2.91
 -29   1   0   14.80    2.94
 -31  -1   0   -1.35    2.71
  31  -1   0    5.06    2.53
 -31  -1   0   -0.32    2.46
 -31   1   0   -2.02    2.37
 -31   1   0   -1.47    2.45
 -33  -1   0   60.96    5.33
 -33  -1   0   67.21    5.10
  33  -1   0   77.10    4.25
 -33   1   0   66.37    5.05
 -33   1   0   68.33    5.10
  35  -1   0   32.68    3.56
 -35  -1   0   34.23    4.46
 -35  -1   0   35.37    4.45
 -35   1   0   45.81    5.03
 -35   1   0   44.12    4.93
 -37  -1   0    3.96    3.19
 -37  -1   0    3.59    3.14
 -37   1   0   15.42    3.59
 -37   1   0   12.90    3.60
 -39  -1   0   62.88    5.97
 -39  -1   0   52.10    5.34
 -39   1   0   60.09    5.45
 -39   1   0   65.49    5.89
 -41  -1   0   19.66    4.52
 -41  -1   0   16.17    4.39
 -41   1   0   14.64    4.09
 -41   1   0   21.84    4.46
   0  -2   0  173.78    3.11
   0   2   0  174.81    3.25
   0   2   0  179.83    3.69
   0   2   0  175.22    3.11
   0   2   0  176.97    4.28
   2   2   0   39.17    2.65
  -2   2   0   41.66    2.16
   2   2   0   42.49    1.71
  -2   2   0   45.45    1.87
  -2   2   0   46.80    1.44
   4  -2   0   72.30    2.56
  -4  -2   0   75.19    2.02
  -4   2   0   68.64    2.43
   4   2   0   71.01    3.03
  -4   2   0   70.13    2.48
   4   2   0   70.87    2.61
  -4   2   0   73.79    2.19
   6  -2   0  218.52    4.63
  -6  -2   0  226.46    4.00
   6   2   0  226.22    5.08
  -6   2   0  220.25    4.83
  -6   2   0  224.34    4.93
   6   2   0  221.67    5.59
  -6   2   0  226.01    4.42
  -8  -2   0  129.56    3.68
   8  -2   0  129.99    3.50
  -8   2   0  130.84    3.69
   8   2   0  130.56    3.83
  -8   2   0  130.01    2.68
  -8   2   0  126.60    3.78
   8   2   0  131.77    4.23
  10  -2   0   74.22    2.88
 -10  -2   0   71.91    3.20
 -10   2   0   76.44    3.22
  10   2   0   75.57    3.44
 -10   2   0   75.03    3.21
  10   2   0   78.86    3.43
  12  -2   0  145.80    4.27
 -12  -2   0  146.33    4.59
  12   2   0  153.38    4.70
  12   2   0  144.63    4.57
 -12   2   0  142.59    4.54
 -12   2   0  149.57    4.59
  14  -2   0   73.91    3.45
 -14  -2   0   77.41    3.71
  14   2   0   71.63    1.77
  14   2   0   77.40    3.66
 -14   2   0   72.38    3.63
 -14   2   0   72.51    3.61
  16  -2   0    3.08    1.81
 -16  -2   0    1.56    1.83
 -16   2   0    1.38    1.62
  16   2   0    2.89    1.82
  16   2   0    3.06    0.81
 -16   2   0    2.28    1.81
 -18  -2   0    0.29    1.74
  18  -2   0   -0.23    1.65
  18   2   0    0.29    0.86
 -18   2   0   -0.19    1.61
  18   2   0    0.36    1.93
 -18   2   0    1.07    1.80
  20  -2   0   99.92    4.11
 -20  -2   0   99.38    4.45
 -20   2   0  101.58    4.66
  20   2   0   99.53    2.73
 -20   2   0  100.45    4.71
  20   2   0  102.81    4.67
 -22  -2   0   67.28    4.32
  22  -2   0   66.73    3.78
  22   2   0   64.42    2.30
 -22   2   0   61.43    4.21
  22   2   0   65.20    4.09
 -22   2   0   55.07    3.79
 -24  -2   0   -1.01    2.25
 -24  -2   0    3.99    2.46
  24  -2   0    1.60    2.31
 -24   2   0    2.36    2.08
 -24   2   0   -0.13    2.05
  26  -2   0  127.76    4.97
  26  -2   0  126.22    5.35
 -26  -2   0  116.38    5.82
 -26  -2   0  111.64    5.76
 -26   2   0  113.93    5.47
 -26   2   0  115.44    5.45
 -28  -2   0    0.62    2.49
  28  -2   0   -1.55    2.21
  28  -2   0    2.52    2.46
 -28  -2   0    3.60    2.79
 -28   2   0    1.95    2.35
 -28   2   0   -2.25    2.14
  30  -2   0   31.43    3.84
 -30  -2   0   31.14    3.97
  30  -2   0   35.90    3.70
 -30  -2   0   30.31    3.89
 -30   2   0   39.13    4.45
 -30   2   0   32.49    4.31
  32  -2   0   27.05    3.87
 -32  -2   0   21.36    3.86
  32  -2   0   22.28    3.28
 -32  -2   0   25.15    3.70
 -32   2   0   22.14    3.89
 -32   2   0   26.20    3.94
 -34  -2   0    7.88    3.12
  34  -2   0   16.39    3.13
 -34  -2   0    9.54    3.59
 -34   2   0   16.45    3.50
 -34   2   0    8.31    3.24
 -36  -2   0   -0.98    2.83
  36  -2   0   -3.98    2.45
 -36  -2   0    7.14    3.48
 -36   2   0   -3.75    2.83
 -36   2   0    0.22    2.73
 -38  -2   0    3.73    3.29
 -38  -2   0    0.43    3.07
  38  -2   0    7.25    3.03
 -38   2   0    5.78    3.19
 -38   2   0   10.52    3.48
 -40  -2   0   20.62    4.51
 -40  -2   0   30.59    4.64
 -40   2   0   20.87    4.48
 -40   2   0   22.93    4.51
  -1  -3   0   30.65    1.27
   1   3   0   31.77    1.49
   1   3   0   31.50    1.31
  -1   3   0   31.62    1.24
   1   3   0   35.38    2.48
  -1   3   0   30.63    2.52
  -1   3   0   31.11    1.35
  -1   3   0   28.12    1.99
  -3  -3   0   31.67    2.09
   3   3   0   32.19    2.97
   3   3   0   33.09    1.76
  -3   3   0   27.31    2.23
  -3   3   0   29.43    1.50
  -3   3   0   29.25    1.99
  -5  -3   0   38.40    1.83
   5  -3   0   42.28    2.24
   5   3   0   43.74    2.34
  -5   3   0   40.47    1.83
   5   3   0   44.46    2.93
  -5   3   0   38.53    2.41
  -5   3   0   42.56    2.24
  -7  -3   0  120.46    2.74
   7  -3   0  117.86    3.56
  -7   3   0  127.58    3.26
  -7   3   0  125.26    3.40
   7   3   0  123.50    3.67
  -7   3   0  122.08    3.64
   7   3   0  121.46    4.24
  -9  -3   0   19.96    1.01
   9  -3   0   18.12    1.95
  -9  -3   0   17.50    2.33
   9   3   0   18.83    2.56
  -9   3   0   17.75    1.56
  -9   3   0   17.81    2.02
   9   3   0   19.92    2.42
  -9   3   0   17.15    2.03
  11  -3   0    0.02    1.51
 -11  -3   0    0.11    1.50
 -11   3   0    0.59    0.80
 -11   3   0    3.86    1.50
  11   3   0    2.47    1.95
  11   3   0   -0.86    1.61
 -11   3   0   -1.78    1.32
 -13  -3   0  166.66    5.03
  13  -3   0  158.65    4.60
  13   3   0  163.79    5.34
 -13   3   0  164.31    4.96
  13   3   0  162.00    5.22
 -13   3   0  161.94    4.88
  15  -3   0   15.29    2.20
 -15  -3   0   10.41    2.13
  15   3   0    8.63    2.13
 -15   3   0   10.11    1.93
  15   3   0   10.21    2.09
 -15   3   0   11.54    2.10
 -17  -3   0    0.23    1.85
  17  -3   0    1.32    1.90
 -17   3   0    1.13    1.79
 -17   3   0    0.55    1.56
  17   3   0    1.68    1.92
  19  -3   0    3.53    1.92
 -19  -3   0    4.74    2.13
 -19   3   0    6.57    2.05
 -19   3   0    6.09    1.98
  19   3   0    7.24    2.17
 -21  -3   0   41.03    3.39
  21  -3   0   37.07    3.43
  21   3   0   28.91    3.52
 -21   3   0   37.31    3.52
 -21   3   0   34.49    3.51
 -23  -3   0    6.07    2.34
  23  -3   0   10.84    2.46
 -23   3   0   11.39    2.56
 -23   3   0   10.56    2.64
  23   3   0   10.61    2.57
 -25  -3   0   10.30    2.59
  25  -3   0   12.90    2.77
 -25  -3   0   11.32    2.89
  25  -3   0   15.40    2.86
 -25   3   0    9.06    2.77
 -25   3   0   11.83    2.58
 -27  -3   0    2.00    2.45
 -27  -3   0   -0.02    2.34
  27  -3   0   -1.31    2.46
  27  -3   0    2.29    2.40
 -27   3   0   -0.61    2.21
 -27   3   0    0.32    2.45
 -29  -3   0   -1.76    2.40
 -29  -3   0   -2.16    2.29
  29  -3   0   -2.44    2.50
  29  -3   0    1.51    2.65
 -29   3   0    0.89    2.51
 -29   3   0   -0.77    2.63
  31  -3   0   22.43    3.61
 -31  -3   0   32.00    4.08
  31  -3   0   31.07    3.81
 -31  -3   0   28.81    3.97
 -31   3   0   32.44    4.41
 -31   3   0   31.38    4.31
 -33  -3   0   37.09    4.35
 -33  -3   0   31.23    4.39
  33  -3   0   37.81    4.28
  33  -3   0   37.83    4.43
 -33   3   0   36.75    4.64
 -33   3   0   37.24    4.65
 -35  -3   0   -0.98    3.10
 -35  -3   0    5.26    3.05
  35  -3   0    3.15    2.98
 -35   3   0    4.34    3.13
 -35   3   0   -2.59    2.76
 -37  -3   0    5.74    3.22
  37  -3   0   -5.62    2.81
 -37  -3   0    3.41    3.46
 -37   3   0    3.14    3.25
 -37   3   0    3.83    3.39
 -39  -3   0    8.02    3.52
 -39  -3   0    8.19    3.66
  39  -3   0   14.89    3.54
 -39   3   0    8.75    3.90
 -39   3   0   12.06    3.70
 -41  -3   0    8.40    4.10
  41  -3   0   -0.41    3.23
 -41  -3   0    7.17    3.60
 -41   3   0    5.43    3.83
 -41   3   0    9.49    3.86
   0  -4   0    1.61    0.62
   0   4   0   -0.72    0.78
   0   4   0    0.67    0.63
   0   4   0    0.66    1.79
   2   4   0   25.83    2.72
  -2   4   0   30.20    2.19
  -2   4   0   27.61    1.32
  -2   4   0   28.21    1.32
  -2   4   0   30.81    2.78
   2   4   0   29.42    1.79
  -4  -4   0    2.28    1.32
  -4   4   0    2.07    0.90
   4   4   0    5.44    1.87
   4   4   0    2.44    1.13
  -4   4   0    2.25    1.27
  -4   4   0    6.26    1.72
  -6  -4   0    5.05    1.21
   6  -4   0    6.13    1.55
   6   4   0    5.67    1.43
  -6   4   0    7.34    1.17
  -6   4   0    5.47    1.51
  -6   4   0    4.81    1.60
   6   4   0    5.04    1.92
   8  -4   0   16.80    2.11
  -8  -4   0   18.19    1.63
   8   4   0   17.97    2.75
  -8   4   0   19.26    2.05
  -8   4   0   18.01    2.14
  -8   4   0   15.52    2.23
   8   4   0   16.16    2.13
 -10  -4   0    9.54    1.76
  10  -4   0   10.46    1.99
 -10  -4   0   12.03    1.29
 -10   4   0   10.61    1.47
  10   4   0   11.37    2.44
 -10   4   0   11.24    1.60
  10   4   0    9.93    1.84
 -10   4   0   10.07    1.83
 -12  -4   0   38.80    2.93
  12  -4   0   43.46    2.87
  12   4   0   41.98    3.03
  12   4   0   44.55    3.32
 -12   4   0   39.97    2.87
 -12   4   0   37.96    2.58
 -14  -4   0   24.62    2.80
  14  -4   0   29.09    3.01
 -14   4   0   18.11    2.44
  14   4   0   22.31    2.85
 -14   4   0   24.28    2.70
  14   4   0   26.20    3.24
  16  -4   0   11.72    2.15
 -16  -4   0    9.13    2.11
  16   4   0    8.51    2.18
 -16   4   0    6.89    1.86
  16   4   0    8.52    2.38
 -16   4   0    8.63    1.93
 -18  -4   0   16.79    2.60
  18  -4   0   16.27    2.58
 -18   4   0   17.32    2.56
 -18   4   0   18.18    2.47
  18   4   0   15.44    2.55
  20  -4   0   -0.26    2.18
 -20  -4   0   -0.28    2.03
 -20   4   0    2.76    1.99
  20   4   0   -0.12    2.07
 -20   4   0   -1.69    1.92
 -22  -4   0    1.72    2.35
  22  -4   0    3.71    2.31
 -22   4   0    3.23    2.21
  22   4   0    2.82    2.16
 -22   4   0   -1.39    1.96
  24  -4   0    0.46    2.21
  24  -4   0   -1.60    2.52
 -24  -4   0   -0.17    2.44
 -24   4   0    0.58    2.18
  24   4   0    2.12    2.48
 -24   4   0   -0.49    2.04
 -26  -4   0   -0.82    2.37
 -26  -4   0   -0.40    2.53
  26  -4   0    1.56    2.44
  26  -4   0    1.38    2.67
 -26   4   0   -1.47    2.22
 -26   4   0    0.76    2.49
  28  -4   0    9.04    3.02
 -28  -4   0    7.06    2.97
  28  -4   0    7.58    2.89
 -28  -4   0    5.10    2.84
 -28   4   0    4.64    2.67
 -28   4   0    9.65    3.01
 -30  -4   0    7.25    3.07
 -30  -4   0    5.84    2.95
  30  -4   0    3.47    2.82
  30  -4   0    2.49    2.91
 -30   4   0    8.52    2.85
 -30   4   0    5.75    2.99
 -32  -4   0    3.14    2.84
  32  -4   0    3.06    2.83
 -32  -4   0    2.73    3.05
  32  -4   0    2.37    2.85
 -32   4   0    5.18    2.94
 -32   4   0    2.21    3.03
  34  -4   0   21.02    3.78
  34  -4   0   21.43    3.61
 -34  -4   0   18.79    3.77
 -34  -4   0   18.71    4.01
 -34   4   0   20.97    3.93
 -34   4   0   30.78    4.40
 -36  -4   0   11.55    3.92
  36  -4   0   12.85    3.43
 -36  -4   0    9.61    3.57
 -36   4   0    8.89    3.55
 -36   4   0    3.85    3.20
 -38  -4   0    1.87    3.27
 -38  -4   0    6.80    3.61
  38  -4   0    0.56    3.14
 -38   4   0    6.65    3.74
 -38   4   0    7.70    3.50
  40  -4   0    8.73    3.51
 -40  -4   0    3.09    3.55
 -40  -4   0    4.64    3.60
 -40   4   0    8.04    3.71
 -40   4   0    3.48    3.46
  -1  -5   0   89.99    3.75
  -1   5   0   86.06    3.29
  -1   5   0   82.27    2.23
   1   5   0   87.51    2.49
  -1   5   0   87.22    2.03
   1   5   0   91.91    4.02
  -1   5   0   96.23    4.13
  -3  -5   0   60.35    3.18
   3   5   0   59.05    3.59
  -3   5   0   59.03    1.85
  -3   5   0   60.31    2.73
   3   5   0   60.14    2.37
  -3   5   0   62.16    1.85
  -3   5   0   65.96    3.49
  -5  -5   0   62.91    2.92
  -5   5   0   64.68    2.20
   5   5   0   68.64    3.88
  -5   5   0   63.00    3.46
   5   5   0   66.06    2.72
  -5   5   0   64.59    3.07
   7  -5   0    0.73    1.53
  -7  -5   0   -0.71    1.19
  -7   5   0    1.40    1.07
   7   5   0    0.67    1.94
  -7   5   0    1.29    1.40
   7   5   0   -1.17    1.25
  -7   5   0   -2.87    1.47
   9  -5   0    3.74    1.76
  -9  -5   0    2.86    1.14
   9   5   0    5.74    2.33
  -9   5   0    2.72    1.53
   9   5   0    1.61    1.49
  -9   5   0    1.94    1.23
  -9   5   0    3.39    1.56
  11  -5   0   -0.52    1.71
 -11  -5   0    0.86    0.93
  11   5   0   -0.79    2.08
 -11   5   0    0.31    1.55
 -11   5   0    1.17    1.27
  11   5   0   -1.42    1.47
 -11   5   0   -0.52    1.25
 -13  -5   0   12.79    2.12
  13  -5   0   14.72    2.31
 -13  -5   0   16.01    1.16
 -13   5   0   10.48    2.09
  13   5   0   12.45    2.11
 -13   5   0   13.40    1.88
  13   5   0   14.59    2.71
 -15  -5   0    0.15    1.82
  15  -5   0    4.52    2.14
  15   5   0    2.99    1.83
 -15   5   0   -0.51    1.67
 -15   5   0    0.46    1.48
  15   5   0    2.89    2.25
  17  -5   0    6.63    2.37
 -17  -5   0    3.59    2.06
 -17   5   0    3.96    1.85
 -17   5   0    6.77    1.86
  17   5   0    7.24    2.18
 -19  -5   0    3.38    2.17
  19  -5   0    3.81    2.41
  19   5   0    3.65    2.20
 -19   5   0    2.07    1.87
 -19   5   0    5.44    1.98
  21  -5   0    9.77    2.86
 -21  -5   0   15.05    2.84
  21   5   0   13.92    2.89
 -21   5   0   15.21    2.63
 -21   5   0   21.98    3.07
  23  -5   0   11.29    3.09
 -23  -5   0    2.55    2.53
  23  -5   0    8.08    2.77
 -23   5   0    9.37    2.48
 -23   5   0   12.36    2.64
  23   5   0   12.90    2.74
  25  -5   0   11.95    2.99
  25  -5   0   10.04    2.86
 -25  -5   0    7.79    2.89
 -25  -5   0    9.55    2.73
  25   5   0    8.91    2.75
 -25   5   0    6.53    2.71
 -25   5   0    6.75    2.55
 -27  -5   0   22.47    3.42
  27  -5   0   24.19    3.56
 -27  -5   0   16.70    3.33
  27  -5   0   16.37    3.29
 -27   5   0   20.42    3.15
 -27   5   0   21.61    3.55
  29  -5   0    3.69    3.05
  29  -5   0    9.03    3.18
 -29  -5   0    1.95    2.45
 -29  -5   0   -5.07    2.30
 -29   5   0   -5.24    2.27
 -29   5   0    0.43    2.46
  31  -5   0   22.54    3.83
  31  -5   0   21.84    3.78
 -31  -5   0   22.77    3.61
 -31  -5   0   21.89    3.97
 -31   5   0   15.79    3.53
 -31   5   0   23.65    3.62
  33  -5   0    3.20    3.20
 -33  -5   0   -1.32    2.73
  33  -5   0   -2.70    2.89
 -33  -5   0   -2.35    2.50
 -33   5   0   -0.23    2.81
 -33   5   0   -2.92    2.75
  35  -5   0    4.70    3.45
 -35  -5   0    2.45    2.97
 -35  -5   0    3.71    3.49
  35  -5   0    3.58    3.35
 -35   5   0    3.86    2.86
 -35   5   0    3.67    3.24
 -37  -5   0    3.51    3.08
 -37  -5   0    1.92    3.68
  37  -5   0    3.12    3.52
  37  -5   0    5.19    3.36
 -37   5   0    1.61    3.12
 -37   5   0   -1.21    3.34
  39  -5   0    1.91    3.31
 -39  -5   0   -0.22    3.53
 -39  -5   0   -1.74    2.89
 -39   5   0   -0.24    3.14
 -39   5   0    2.02    3.48
   0  -6   0   66.74    3.69
   0   6   0   70.76    2.11
   0   6   0   65.41    3.77
  -2  -6   0    1.12    1.69
  -2   6   0    1.08    0.61
  -2   6   0   -0.33    1.38
   2   6   0    0.70    2.10
  -2   6   0    2.23    1.96
   2   6   0    1.78    0.99
  -2   6   0    0.22    0.71
  -4  -6   0   37.10    2.71
  -4   6   0   33.74    1.47
   4   6   0   33.48    2.11
  -4   6   0   37.62    2.66
   4   6   0   38.21    3.71
  -4   6   0   35.40    1.56
  -4   6   0   37.25    3.18
  -6  -6   0   21.17    2.43
  -6   6   0   22.88    2.49
  -6   6   0   21.72    1.61
   6   6   0   23.80    2.13
  -6   6   0   20.71    2.96
   6   6   0   26.41    3.18
   8  -6   0   11.96    2.00
  -8  -6   0    7.69    1.59
   8   6   0    7.79    1.59
  -8   6   0    6.03    1.21
  -8   6   0    8.52    1.94
  -8   6   0    8.71    1.81
   8   6   0    8.16    2.35
  10  -6   0   28.70    2.93
 -10  -6   0   30.70    2.20
  10   6   0   25.72    3.26
 -10   6   0   33.18    2.59
  10   6   0   27.13    2.62
 -10   6   0   33.78    2.21
 -10   6   0   31.05    2.90
 -12  -6   0   16.21    1.77
  12  -6   0   17.91    2.33
  12   6   0   12.21    2.13
 -12   6   0   12.43    2.19
 -12   6   0   12.06    1.74
  12   6   0   14.45    2.89
 -14  -6   0    4.92    1.95
  14  -6   0    6.11    2.27
  14   6   0    5.18    2.57
  14   6   0    5.69    2.07
 -14   6   0    2.88    1.54
 -14   6   0    1.01    1.75
 -16  -6   0    6.66    2.25
  16  -6   0   11.43    2.62
 -16   6   0   12.15    2.31
  16   6   0   13.06    2.43
 -16   6   0   13.34    2.11
 -18  -6   0   15.35    2.68
  18  -6   0   18.67    2.99
  18   6   0   17.50    2.75
 -18   6   0   14.13    2.23
 -18   6   0   13.69    2.53
  20  -6   0   46.68    3.93
  20  -6   0   51.34    4.42
 -20  -6   0   52.30    4.04
 -20   6   0   57.21    3.69
  20   6   0   49.02    4.01
 -20   6   0   48.31    3.89
  22  -6   0   30.92    3.96
 -22  -6   0   31.19    3.84
  22  -6   0   28.39    3.63
  22   6   0   17.97    3.21
 -22   6   0   26.50    3.39
 -22   6   0   26.36    3.16
 -24  -6   0    0.56    2.26
  24  -6   0    1.05    2.91
 -24  -6   0    0.97    2.53
  24  -6   0    2.83    2.71
 -24   6   0    2.15    2.27
 -24   6   0   -0.31    2.45
  24   6   0   -1.21    2.41
  26  -6   0   44.66    4.92
  26  -6   0   41.74    4.64
 -26  -6   0   33.89    4.15
 -26  -6   0   40.44    4.36
 -26   6   0   38.67    4.23
 -26   6   0   32.65    3.80
 -28  -6   0    4.79    2.71
  28  -6   0    1.28    2.70
 -28  -6   0    1.11    2.84
  28  -6   0   -2.35    2.96
 -28   6   0   -0.71    2.39
 -28   6   0   -2.11    2.31
  30  -6   0   31.10    4.22
 -30  -6   0   27.37    4.17
  30  -6   0   32.58    4.18
 -30  -6   0   38.93    4.59
 -30   6   0   25.97    4.00
 -30   6   0   32.93    4.21
  32  -6   0   -0.18    3.05
  32  -6   0   -0.81    3.29
 -32  -6   0   -1.25    3.09
 -32  -6   0    0.09    2.83
 -32   6   0    2.98    3.17
 -32   6   0   -0.72    2.74
  34  -6   0    5.35    3.47
 -34  -6   0    4.32    3.06
  34  -6   0   -0.65    3.21
 -34  -6   0    3.69    3.15
 -34   6   0    0.61    2.78
 -34   6   0    1.97    3.18
  36  -6   0    2.77    3.40
 -36  -6   0   -1.07    3.34
  36  -6   0    1.72    3.45
 -36  -6   0    2.38    3.23
 -36   6   0    1.26    3.07
 -36   6   0    3.35    3.08
  38  -6   0    1.56    3.53
 -38  -6   0    0.43    3.35
 -38  -6   0   -2.78    3.54
  38  -6   0    7.39    3.72
 -38   6   0    3.24    3.60
 -38   6   0    4.46    3.30
  -1  -7   0   -2.26    1.74
   1  -7   0    2.92    2.04
  -1   7   0    0.03    2.10
   1   7   0   -0.66    0.91
  -1   7   0   -0.76    0.74
   1   7   0    3.42    2.30
   3  -7   0    5.70    2.31
  -3  -7   0    4.72    2.02
  -3   7   0    7.18    0.99
   3   7   0    6.84    1.25
  -3   7   0    7.46    1.78
  -3   7   0    9.15    2.39
   3   7   0    5.70    2.28
   5  -7   0   -0.49    2.20
  -5  -7   0   -0.05    1.63
   5   7   0   -0.23    1.20
  -5   7   0    0.40    1.58
   5   7   0    2.66    2.27
  -5   7   0    2.73    2.03
  -5   7   0    1.42    0.79
  -5   7   0    1.19    0.73
  -7  -7   0   65.72    3.35
   7  -7   0   65.97    4.22
  -7   7   0   69.89    3.47
  -7   7   0   68.72    3.95
  -7   7   0   67.14    2.38
   7   7   0   65.55    4.57
  -7   7   0   65.90    2.09
   7   7   0   71.05    3.07
  -9  -7   0   64.32    3.23
   9   7   0   61.64    3.24
   9   7   0   60.96    4.28
  -9   7   0   66.62    2.58
  -9   7   0   63.12    3.64
  -9   7   0   59.70    3.52
 -11  -7   0    1.70    1.44
  11   7   0    1.32    1.73
 -11   7   0    1.09    1.32
  11   7   0    0.34    2.23
 -11   7   0    2.64    1.83
 -13  -7   0   94.73    4.30
 -13   7   0   95.08    3.62
 -13   7   0   94.00    4.31
  13   7   0   90.44    4.07
  13   7   0   84.32    5.04
 -15  -7   0    7.04    2.27
  15  -7   0   10.05    2.93
 -15   7   0    7.07    1.75
  15   7   0    6.31    2.21
 -15   7   0    5.98    2.22
 -17  -7   0   44.63    3.74
  17  -7   0   37.50    4.14
 -17   7   0   39.68    3.55
 -17   7   0   38.14    3.12
  17   7   0   48.33    3.84
 -19  -7   0    0.73    2.19
  19  -7   0   -1.48    2.73
 -19   7   0   -1.42    1.76
  19   7   0    0.10    2.26
 -19   7   0   -1.19    2.14
 -21  -7   0    7.24    2.41
 -21  -7   0    3.54    2.51
  21  -7   0    5.67    2.82
 -21   7   0    5.60    2.47
  21   7   0    7.08    2.73
 -21   7   0    4.17    2.21
 -23  -7   0   -1.16    2.11
 -23  -7   0    2.85    2.62
  23  -7   0   -0.34    2.72
 -23   7   0   -1.99    2.11
 -23   7   0   -1.98    2.26
 -25  -7   0   -2.67    2.30
  25  -7   0    3.07    2.92
 -25  -7   0   -1.73    2.50
 -25   7   0   -1.24    2.34
 -25   7   0   -1.20    2.48
 -27  -7   0    6.84    3.16
 -27  -7   0    9.84    3.10
  27  -7   0    6.14    3.18
 -27   7   0    6.33    2.94
 -27   7   0   11.89    2.85
 -29  -7   0    8.11    3.32
 -29  -7   0    8.61    3.08
  29  -7   0    7.20    3.53
 -29   7   0    8.31    3.18
 -29   7   0   10.93    3.09
 -31  -7   0    6.98    3.04
 -31  -7   0    5.29    3.35
  31  -7   0    1.34    3.24
 -31   7   0    5.01    3.21
 -31   7   0    9.82    3.06
 -33  -7   0   11.01    3.87
  33  -7   0   13.34    3.85
 -33  -7   0   13.81    3.59
 -33   7   0    8.53    3.35
 -33   7   0   13.53    3.68
  35  -7   0    6.58    3.50
 -35  -7   0    8.15    3.48
 -35  -7   0    7.51    3.83
 -35   7   0    7.09    3.33
 -35   7   0    8.49    3.69
   0  -8   0  180.99    6.26
   0   8   0  171.24    6.46
  -2  -8   0   13.00    2.61
   2  -8   0   12.98    2.77
   2   8   0   11.60    2.73
  -2   8   0    9.43    2.68
  -4  -8   0   15.78    2.57
   4  -8   0   16.42    3.12
  -4   8   0   21.36    2.77
   4   8   0   23.19    3.38
  -4   8   0   18.49    2.97
   6  -8   0   72.86    4.90
  -6  -8   0   76.87    3.99
   6   8   0   64.92    4.84
   6   8   0   68.63    3.03
  -6   8   0   68.80    4.24
  -6   8   0   71.39    3.76
   8  -8   0    3.96    2.67
  -8  -8   0    4.53    2.02
  -8   8   0    0.68    1.75
   8   8   0    2.41    1.57
   8   8   0    3.49    2.67
  10  -8   0    3.59    2.49
 -10   8   0   -2.59    1.67
  10   8   0    1.59    1.74
  10   8   0    1.55    2.46
  12  -8   0   16.26    3.21
 -12   8   0   15.53    2.60
  12   8   0   12.70    2.25
  12   8   0    8.61    3.07
 -14  -8   0   14.65    2.66
  14  -8   0   11.15    3.18
  14   8   0   16.13    2.54
 -14   8   0   15.01    2.72
 -16  -8   0    5.81    2.33
  16  -8   0    5.24    3.02
  16   8   0    3.84    2.09
 -16   8   0    2.07    2.21
 -18  -8   0    6.60    2.50
  18  -8   0    7.88    3.26
 -18   8   0    5.71    2.38
  18   8   0    7.16    2.52
 -20  -8   0   49.66    4.19
  20  -8   0   50.71    4.86
  20   8   0   46.20    4.23
 -20   8   0   51.07    4.12
 -22  -8   0   19.65    3.51
  22  -8   0   25.33    4.10
 -22   8   0   23.94    3.41
 -24  -8   0    3.05    2.78
  24  -8   0    3.92    3.25
 -24   8   0    3.33    2.86
  26  -8   0   40.82    4.73
 -26  -8   0   31.60    4.35
 -26   8   0   38.27    4.26
  28  -8   0   18.31    3.92
 -28  -8   0   13.73    3.55
 -28   8   0   16.83    3.58
 -30  -8   0    9.55    3.41
  30  -8   0    4.38    3.77
 -30   8   0   10.04    3.41
 -32  -8   0   18.95    4.08
  32  -8   0   15.52    4.39
 -32   8   0   20.80    3.96
 -34  -8   0   -1.16    3.41
  34  -8   0   -2.58    3.61
 -34   8   0   -1.92    3.01
  -1  -9   0   62.19    4.46
   1  -9   0   64.65    4.62
  -1   9   0   64.69    4.76
   1   9   0   66.64    4.99
   3  -9   0    5.37    2.71
  -3  -9   0    7.89    2.56
   3   9   0    3.08    2.85
  -3   9   0    6.76    2.80
   5  -9   0   14.74    3.33
  -5  -9   0   16.43    2.85
   5   9   0   16.52    3.36
   7  -9   0   18.39    3.34
  -7  -9   0   18.51    2.75
  -7   9   0   21.97    3.02
   7   9   0   11.90    3.20
   9  -9   0   -0.10    2.61
  -9   9   0    4.60    2.18
  11  -9   0    0.99    2.96
 -11   9   0   -0.36    2.00
  13  -9   0   87.55    5.96
 -13   9   0   94.47    4.61
  15  -9   0   13.31    3.75
 -15  -9   0   17.14    2.87
 -15   9   0   13.24    2.85
  17  -9   0   14.09    3.58
 -17  -9   0    9.20    2.78
 -17   9   0    8.05    2.63
  19  -9   0   33.71    4.65
 -19  -9   0   30.00    4.10
 -19   9   0   27.77    3.58
 -21  -9   0   24.40    3.59
  21  -9   0   18.12    3.90
 -21   9   0   19.13    3.22
 -23  -9   0    1.56    2.68
  23  -9   0   -2.36    3.04
 -23   9   0   -6.04    2.23
 -25  -9   0   17.90    3.67
  25  -9   0   18.23    4.11
 -25   9   0   13.72    3.31
 -27  -9   0   10.95    3.60
  27  -9   0    8.20    3.69
 -27   9   0   14.68    3.50
  29  -9   0    0.71    3.38
 -29  -9   0   -1.27    3.11
 -29   9   0    3.22    3.24
  31  -9   0   -1.00    3.72
 -31  -9   0    1.83    3.32
 -31   9   0    4.81    3.29
   0 -10   0   18.00    3.35
   2 -10   0   12.03    3.04
  -2 -10   0    8.06    2.94
  -4 -10   0   -2.55    2.31
   4 -10   0    0.07    2.80
  -6 -10   0   13.89    2.86
   6 -10   0   13.69    3.46
   8 -10   0   33.05    4.58
  -8  10   0   31.59    3.44
  10 -10   0    3.53    3.16
 -10  10   0    0.31    2.12
  12 -10   0   40.09    4.56
 -12  10   0   41.89    3.82
  14 -10   0   56.82    5.15
 -14  10   0   56.62    4.32
  16 -10   0    5.72    3.42
 -16  10   0    1.27    2.43
  18 -10   0   26.83    4.47
  20 -10   0   51.20    5.73
  22 -10   0   -1.79    3.49
  24 -10   0    4.22    3.58
  26 -10   0   17.72    4.59
  28 -10   0    9.69    4.28
   1 -11   0   84.96    5.58
  -1 -11   0   82.98    5.63
   3 -11   0   -2.05    2.87
  -3 -11   0   -2.91    2.73
   5 -11   0   38.50    4.99
   7 -11   0   39.56    5.03
   9 -11   0   -0.20    2.95
  11 -11   0   23.43    4.47
  13 -11   0   17.16    4.06
  15 -11   0    9.94    4.10
  17 -11   0   -0.54    3.35
  19 -11   0   15.67    4.69
  21 -11   0   22.72    4.89
  23 -11   0    7.16    4.29
  25 -11   0   24.00    5.22
   0 -12   0    3.91    3.14
   2 -12   0    1.96    3.26
   4 -12   0    0.29    3.07
   6 -12   0   34.19    5.05
   8 -12   0   78.31    6.31
  10 -12   0    4.79    3.84
  12 -12   0   27.49    4.88
  14 -12   0   34.54    5.37
  16 -12   0    3.71    4.03
  18 -12   0   12.79    4.71
  20 -12   0    6.44    4.41
   3 -13   0    2.69    3.63
   5 -13   0   41.57    5.67
   7 -13   0    6.55    4.01
   9 -13   0   -5.47    3.56
  11 -13   0    7.08    4.03
  13 -13   0    7.15    4.16
 -42   0   1    4.02    3.21
 -42   0   1   -0.19    3.43
 -40   0   1   -1.40    3.02
 -40   0   1    0.66    3.30
 -38   0   1   -7.12    2.93
 -38   0   1    2.94    3.16
 -36   0   1   -3.55    2.64
  36   0  -1   -1.78    2.20
 -36   0   1   -0.49    2.90
  34   0  -1   -0.48    2.22
 -34   0   1    0.16    2.78
 -34   0   1    1.09    2.83
  32   0  -1   -2.33    2.03
 -32   0   1    3.35    2.69
 -32   0   1    0.05    2.73
 -30   0   1    0.73    2.65
  30   0  -1   -0.49    2.06
 -30   0   1    1.76    2.56
 -28   0   1    0.18    2.16
 -28   0   1    1.22    2.53
  28   0  -1    2.37    2.06
 -26   0   1   -1.28    2.23
  26   0  -1   -0.11    1.83
 -24   0   1    0.91    2.04
  24   0  -1   -0.70    1.98
  24   0  -1   -1.28    1.75
 -22   0   1    0.58    1.84
  22   0  -1    0.78    1.59
  22   0  -1    1.31    2.09
 -20   0   1    4.40    2.04
  20   0  -1   -0.74    1.74
  20   0  -1    3.36    1.63
 -18   0   1   -1.13    1.62
  18   0  -1   -2.58    1.62
  18   0  -1    1.73    1.59
  16   0  -1    1.88    1.55
 -16   0   1    2.41    1.86
  16   0  -1    0.69    1.71
  14   0  -1    2.10    1.78
  14   0  -1    0.62    1.12
 -14   0   1    2.62    1.69
  14   0  -1   -2.01    1.29
  12   0  -1   -0.38    1.46
 -12   0   1    0.52    1.42
  12   0  -1    0.14    1.12
  12   0  -1   -0.35    1.22
 -10   0   1    1.30    1.53
  10   0  -1    0.06    1.37
  10   0  -1   -0.20    1.04
  10   0  -1    0.16    1.19
   8   0  -1    3.17    1.12
   8   0  -1   -1.10    1.22
  -8   0   1   -2.36    1.34
   8   0  -1    0.41    1.41
   6   0  -1   -1.52    1.00
  -6   0   1    0.29    1.06
   4   0  -1   -0.30    0.70
  -4   0   1   -0.24    0.62
   2   0  -1   -0.08    0.34
   2   0  -1   -0.72    0.34
   0   0  -1   -0.32    0.35
   0   0   1   -0.26    0.23
   0   0  -1   -0.53    0.28
   0   0  -1   -0.09    0.29
   2   0   1    0.45    0.51
  -2   0  -1    0.74    0.62
  -2   0  -1    0.19    0.52
  -2   0  -1    0.51    0.61
  -4   0  -1    0.09    0.90
  -4   0  -1    0.70    0.95
   4   0   1    0.75    0.74
   4   0   1    1.28    0.80
  -6   0  -1   -1.07    1.18
   6   0   1    0.37    1.09
  -6   0  -1   -1.46    1.31
   6   0   1   -1.70    1.09
  -8   0  -1   -1.47    1.30
   8   0   1    0.48    1.10
   8   0   1   -1.41    1.11
  -8   0  -1   -0.63    1.34
 -10   0  -1   -2.03    1.51
  10   0   1   -0.81    1.15
 -10   0  -1   -0.44    1.48
  10   0   1    1.58    1.22
 -12   0  -1   -0.86    1.40
  12   0   1   -0.35    1.29
 -12   0  -1   -2.72    1.45
  12   0   1    0.17    1.27
  14   0   1   -0.46    1.32
 -14   0  -1    1.31    1.68
  14   0   1   -1.70    1.40
 -14   0  -1    0.43    1.56
 -16   0  -1    0.18    1.82
  16   0   1   -1.62    1.31
  16   0   1    0.24    1.44
 -16   0  -1   -1.39    1.52
  18   0   1   -0.23    1.47
  18   0   1    0.52    1.41
 -18   0  -1   -2.76    1.60
 -18   0  -1   -0.07    1.69
  20   0   1   -2.32    1.42
  20   0   1    0.23    1.55
 -20   0  -1    0.81    1.77
 -20   0  -1    1.47    1.90
 -22   0  -1    2.42    2.19
  22   0   1   -0.16    1.59
  22   0   1    0.30    1.63
 -22   0  -1    2.47    2.00
 -24   0  -1   -2.56    2.11
  24   0   1    1.01    1.74
  24   0   1    1.14    1.83
 -24   0  -1    2.76    2.20
  26   0   1    1.69    1.91
 -26   0  -1    1.79    2.40
  26   0   1    0.28    1.81
 -26   0  -1   -1.20    2.16
 -28   0  -1    1.39    2.65
 -28   0  -1    0.51    2.57
 -30   0  -1   -0.74    2.35
 -30   0  -1    1.50    2.80
 -32   0  -1   -0.12    2.55
 -32   0  -1   -3.85    2.39
 -34   0  -1    4.13    3.27
 -34   0  -1   -0.81    2.97
 -36   0  -1    5.39    3.14
 -36   0  -1   -2.11    2.89
 -38   0  -1   -0.74    3.35
 -38   0  -1    0.85    3.28
 -40   0  -1   -1.27    3.04
 -40   0  -1   -2.53    3.38
 -43  -1   1   -0.38    3.49
 -43   1   1    0.78    3.47
 -41  -1   1    6.71    3.81
 -41  -1   1    8.10    3.86
 -41   1   1    4.51    3.36
 -41   1   1    4.01    3.53
 -39  -1   1    0.55    3.24
  39  -1  -1   -0.47    2.62
 -39  -1   1   -3.03    2.91
 -39   1   1    5.93    3.17
 -39   1   1   -0.58    3.15
  37  -1  -1    0.46    2.52
 -37  -1   1   -5.79    2.96
 -37  -1   1    0.99    2.82
 -37   1   1    0.11    2.75
 -37   1   1    1.49    2.91
  35  -1  -1   20.58    3.02
 -35  -1   1   18.21    3.68
 -35  -1   1   13.66    3.49
 -35   1   1   14.65    3.63
 -35   1   1   18.83    3.58
 -33  -1   1    0.40    2.61
  33  -1  -1   -1.24    2.39
 -33  -1   1    0.91    2.53
 -33   1   1    5.81    3.01
 -33   1   1    5.85    2.81
  31  -1  -1   19.63    2.85
  31  -1  -1   13.37    2.69
 -31  -1   1   13.14    3.31
 -31  -1   1   13.32    3.24
 -31   1   1   14.76    3.10
 -31   1   1   14.70    3.30
  31   1  -1   12.19    2.15
  29  -1  -1    8.44    2.40
 -29  -1   1    3.84    2.51
 -29  -1   1    3.47    2.52
 -29   1   1    6.50    2.59
  29   1  -1    4.44    1.90
 -29   1   1    7.23    2.60
 -27  -1   1   30.07    3.60
  27  -1  -1   26.09    3.39
  27   1  -1   30.49    2.69
 -27   1   1   24.36    3.45
  27   1  -1   30.86    3.62
 -27   1   1   23.34    3.35
  25  -1  -1   23.00    2.97
 -25  -1   1   21.00    3.12
  25   1  -1   18.81    3.19
 -25   1   1   29.34    3.73
 -25   1   1   22.90    3.13
  25   1  -1   23.25    2.67
 -23  -1   1   -0.65    2.04
  23  -1  -1    1.29    1.99
  23   1  -1    2.27    2.12
 -23   1   1   -1.88    1.79
  23   1  -1    2.29    1.54
 -21  -1   1    2.63    1.91
  21  -1  -1    1.81    1.80
  21  -1  -1    2.07    2.04
 -21   1   1    3.93    2.06
  21   1  -1    0.84    1.32
  21   1  -1    1.17    1.87
  19  -1  -1   18.16    2.16
  19  -1  -1   27.85    3.11
 -19  -1   1   21.65    3.00
 -19   1   1   21.45    2.66
  19   1  -1   24.30    2.90
  19   1  -1   21.65    2.18
  17  -1  -1    3.82    1.76
  17  -1  -1    5.92    1.98
 -17  -1   1    6.79    2.04
 -17   1   1    5.98    1.81
  17   1  -1    0.86    1.91
  17   1  -1    5.17    1.41
  17   1  -1    4.51    1.55
 -15  -1   1    5.44    1.84
  15  -1  -1    2.05    1.62
  15  -1  -1    2.37    1.63
  15   1  -1    4.13    1.94
 -15   1   1    6.04    1.75
  15   1  -1    3.32    1.57
  15   1  -1    4.06    1.36
 -13  -1   1   25.31    2.47
  13  -1  -1   23.94    2.12
  13  -1  -1   27.70    2.69
 -13   1   1   26.83    2.70
  13   1  -1   29.38    2.39
  13   1  -1   26.40    1.93
  13   1  -1   29.39    2.66
  11  -1  -1   30.89    2.59
  11  -1  -1   31.93    2.34
 -11  -1   1   31.70    2.42
 -11   1   1   30.93    2.35
  11   1  -1   32.47    2.44
  11   1  -1   30.07    1.79
  11   1  -1   34.21    2.82
   9  -1  -1   21.05    2.31
  -9  -1   1   26.46    2.44
   9  -1  -1   25.16    1.96
   9   1  -1   22.42    1.62
   9   1  -1   23.69    2.30
  -9   1   1   22.52    2.34
   9   1  -1   25.39    2.21
  -7  -1   1   88.74    3.03
   7  -1  -1   86.35    2.90
   7   1  -1   95.64    3.09
  -7   1   1   90.32    2.88
   7   1  -1   86.64    2.17
   7   1  -1   86.65    2.20
   7   1  -1   89.96    3.21
  -5  -1   1   56.14    1.64
   5  -1  -1   59.57    1.88
  -5   1   1   57.88    1.93
   5   1  -1   54.38    2.09
   5   1  -1   57.20    1.68
   3  -1  -1   40.94    1.21
  -3  -1   1   41.86    1.36
  -3   1   1   40.92    1.21
   3   1  -1   40.49    1.45
   3   1  -1   37.93    1.55
   3   1  -1   39.93    1.32
   1  -1  -1    2.27    0.36
  -1  -1   1    3.20    0.67
  -1  -1   1    1.82    0.57
   1   1  -1    1.44    0.56
   1   1  -1    0.93    0.67
   1   1  -1    1.86    0.48
   1   1  -1    2.14    0.54
  -1   1   1    2.18    0.35
   1  -1   1   -0.58    0.66
  -1  -1  -1   -0.36    0.49
   1  -1   1    0.73    0.78
  -1  -1  -1   -0.59    0.52
   1   1   1   -0.05    0.47
  -1   1  -1   -0.15    0.58
  -1   1  -1    0.25    0.73
   1   1   1   -0.52    0.50
  -3  -1  -1    0.31    0.48
  -3  -1  -1    1.11    0.83
   3  -1   1   -0.45    0.98
   3  -1   1    1.63    1.00
  -3  -1  -1   -0.24    0.90
  -3   1  -1   -0.12    0.98
  -3   1  -1   -0.68    0.86
  -5  -1  -1   84.98    1.83
  -5  -1  -1   85.15    2.80
   5  -1   1   86.80    2.92
   5  -1   1   90.26    3.08
  -5  -1  -1   86.68    2.72
  -5   1  -1   88.62    2.80
  -5   1  -1   89.79    2.89
   5   1   1   86.39    1.85
   7  -1   1  281.15    6.05
  -7  -1  -1  275.19    5.87
   7  -1   1  276.58    5.52
  -7  -1  -1  280.14    5.96
   7   1   1  281.02    5.00
  -7   1  -1  277.95    5.97
  -7   1  -1  283.14    6.07
   9  -1   1    1.98    1.39
  -9  -1  -1    2.82    1.54
  -9  -1  -1    1.13    1.37
  -9   1  -1    4.52    1.49
   9   1   1    2.84    0.84
  -9   1  -1    2.01    1.35
  11  -1   1   41.79    2.53
 -11  -1  -1   41.30    3.01
 -11  -1  -1   38.92    2.66
  11   1   1   37.60    1.69
 -11   1  -1   39.49    2.89
 -11   1  -1   31.91    2.60
  13  -1   1   19.47    2.37
 -13  -1  -1   21.59    2.88
 -13  -1  -1   19.25    2.74
  13  -1   1   22.04    2.51
  13   1   1   16.21    1.67
 -13   1  -1   21.84    2.55
 -13   1  -1   16.20    2.24
 -15  -1  -1   20.10    2.68
  15  -1   1   16.06    2.30
 -15  -1  -1   15.86    2.37
  15  -1   1   12.38    1.91
 -15   1  -1   12.56    2.07
 -15   1  -1   15.85    2.31
  15   1   1   15.38    1.69
  17  -1   1   29.56    2.68
  17  -1   1   30.52    2.62
 -17  -1  -1   35.30    3.24
 -17  -1  -1   24.61    3.23
  17   1   1   33.33    2.09
 -17   1  -1   29.88    3.16
 -17   1  -1   30.61    3.26
 -19  -1  -1    2.59    2.03
 -19  -1  -1    5.07    2.15
  19  -1   1   10.32    2.03
  19  -1   1    4.36    1.74
 -19   1  -1    6.83    2.04
 -19   1  -1    4.12    1.99
  19   1   1    6.50    1.40
  21  -1   1   23.63    2.78
 -21  -1  -1   28.43    3.49
  21  -1   1   22.16    2.80
 -21  -1  -1   21.54    2.92
  21   1   1   22.75    2.12
 -21   1  -1   24.84    3.08
 -21   1  -1   21.58    2.97
  23  -1   1   27.97    2.97
  23  -1   1   22.99    2.92
 -23  -1  -1   18.98    3.05
 -23  -1  -1   18.69    3.02
  23   1   1   19.13    2.00
 -23   1  -1   22.01    3.11
 -23   1  -1   19.59    2.97
  25  -1   1   -1.17    1.98
 -25  -1  -1    2.19    2.15
 -25  -1  -1   -1.71    2.35
  25  -1   1   -1.18    1.99
 -25   1  -1    1.43    2.40
 -25   1  -1   -2.59    2.02
 -27  -1  -1    4.60    2.54
 -27  -1  -1    3.23    2.51
  27  -1   1    1.24    2.23
  27  -1   1    4.05    2.21
 -27   1  -1    2.53    2.48
 -27   1  -1    3.93    2.45
 -29  -1  -1   12.13    3.17
 -29  -1  -1    6.70    2.88
  29  -1   1    9.58    2.58
  29  -1   1    8.39    2.52
 -29   1  -1    7.89    2.80
 -29   1  -1    4.66    2.94
 -31  -1  -1    1.19    2.59
 -31  -1  -1    2.84    2.69
  31  -1   1    2.89    2.41
 -31   1  -1    0.65    2.50
 -31   1  -1    1.42    2.92
 -33  -1  -1   -3.03    2.94
 -33  -1  -1   -2.02    2.53
 -33   1  -1    2.88    2.79
 -33   1  -1    2.02    3.02
 -35  -1  -1    5.68    3.12
 -35  -1  -1    5.75    3.55
 -35   1  -1    4.55    3.20
 -35   1  -1   -1.75    3.03
 -37  -1  -1   -3.57    3.21
 -37  -1  -1    4.35    3.53
 -37   1  -1    4.56    3.47
 -37   1  -1   -1.38    2.96
 -39  -1  -1    3.14    3.75
 -39  -1  -1    2.76    3.21
 -39   1  -1   11.97    3.75
 -39   1  -1    6.59    3.46
 -41  -1  -1    8.50    4.10
 -41  -1  -1    3.91    3.83
 -41   1  -1   -0.41    3.46
 -41   1  -1    4.66    3.89
 -42  -2   1   22.96    4.66
  42  -2  -1   12.94    3.53
 -42  -2   1   17.93    4.14
 -42   2   1   16.43    4.28
 -42   2   1   18.90    4.35
  40  -2  -1    4.98    3.08
 -40  -2   1    3.71    3.76
 -40  -2   1    7.94    3.78
 -40   2   1    5.11    3.31
 -40   2   1    5.90    3.53
 -38  -2   1    4.56    3.55
 -38  -2   1    7.58    3.55
  38  -2  -1    7.84    3.04
 -38   2   1    4.23    3.47
 -38   2   1    0.09    3.08
 -36  -2   1    2.57    3.04
  36  -2  -1    4.96    2.72
 -36  -2   1    4.32    2.93
 -36   2   1    4.42    2.88
 -36   2   1    4.78    3.24
 -34  -2   1    3.95    2.86
 -34  -2   1    4.55    3.25
  34  -2  -1    3.61    2.79
 -34   2   1    4.06    2.75
 -34   2   1    5.25    3.10
  32  -2  -1   -1.54    2.41
  32  -2  -1    0.60    2.46
 -32  -2   1    4.43    2.89
 -32  -2   1   -0.95    2.80
 -32   2   1    0.80    2.75
 -32   2   1    1.12    2.72
 -30  -2   1    0.98    2.45
  30  -2  -1    3.94    2.51
 -30  -2   1   -1.21    2.69
 -30   2   1    2.28    2.70
 -30   2   1   -1.10    2.33
 -28  -2   1   13.26    3.14
  28  -2  -1   16.33    2.75
 -28   2   1   12.20    2.82
 -28   2   1   15.81    3.23
  28   2  -1   16.30    3.09
 -26  -2   1  119.18    5.48
  26  -2  -1  103.43    4.68
  26   2  -1  109.66    5.66
 -26   2   1  111.15    5.23
 -26   2   1  114.28    5.54
  24  -2  -1    1.94    2.12
 -24  -2   1    1.93    2.20
  24   2  -1    2.69    2.10
 -24   2   1   -3.11    1.79
 -24   2   1    1.46    2.20
  22  -2  -1  102.32    4.26
 -22  -2   1  106.91    5.01
 -22   2   1  103.10    4.84
  22   2  -1  102.51    4.81
 -22   2   1  106.85    4.94
  20  -2  -1   86.05    3.83
 -20  -2   1   84.83    4.35
  20   2  -1   86.71    4.25
 -20   2   1   87.00    4.15
 -20   2   1   80.54    4.20
  18  -2  -1   24.36    2.50
 -18  -2   1   27.99    3.14
 -18   2   1   24.37    2.94
  18   2  -1   28.33    2.87
  18   2  -1   27.61    1.52
  18   2  -1   33.35    3.01
 -16  -2   1  207.04    5.80
  16  -2  -1  196.24    5.15
  16   2  -1  205.25    3.63
  16   2  -1  199.79    5.95
  16   2  -1  196.82    5.67
 -16   2   1  199.96    5.81
  14  -2  -1    5.01    1.80
 -14  -2   1    6.20    1.74
  14  -2  -1    5.96    1.75
  14   2  -1    8.11    1.88
 -14   2   1    3.42    1.77
  14   2  -1    1.31    1.71
  12  -2  -1   79.80    3.26
  12  -2  -1   80.29    3.24
 -12  -2   1   82.63    3.34
  12   2  -1   80.85    3.61
  12   2  -1   77.89    3.48
 -12   2   1   82.04    3.37
  10  -2  -1    4.73    1.39
  10  -2  -1    0.75    1.32
 -10  -2   1    2.13    1.55
  10   2  -1    3.35    1.64
  10   2  -1    3.45    0.73
  10   2  -1    2.86    1.64
 -10   2   1    2.59    1.31
   8  -2  -1   36.43    1.45
  -8  -2   1   37.76    1.48
   8  -2  -1   37.66    2.21
   8   2  -1   31.45    2.53
   8   2  -1   37.05    1.49
   8   2  -1   34.73    2.48
  -8   2   1   35.65    2.21
  -6  -2   1  165.37    3.44
   6  -2  -1  161.44    3.60
   6   2  -1  166.31    3.99
   6   2  -1  161.10    4.43
  -6   2   1  155.11    3.71
  -4  -2   1    1.85    1.06
   4   2  -1    3.61    1.70
  -4   2   1    0.78    0.96
   4   2  -1    0.24    1.05
   4   2  -1   -2.55    1.12
  -2  -2   1   65.50    2.41
   2   2  -1   64.85    2.20
  -2   2   1   67.99    1.87
   2   2  -1   65.96    1.96
  -2   2   1   65.59    1.39
   0  -2   1  296.26    6.13
   0   2  -1  299.64    5.37
   0   2  -1  295.69    5.72
   0   2  -1  299.70    5.06
   2  -2   1    2.23    1.31
  -2  -2  -1    2.71    0.77
   2  -2   1    1.03    1.52
   2   2   1    1.82    1.03
  -2   2  -1    1.94    1.24
  -2   2  -1    4.34    0.99
   4  -2   1  206.55    4.54
  -4  -2  -1  209.96    4.47
  -4   2  -1  209.11    4.54
  -4   2  -1  215.20    4.80
   4   2   1  208.97    4.67
   6  -2   1   24.26    2.37
  -6  -2  -1   26.00    2.08
   6   2   1   27.04    2.06
  -6   2  -1   21.59    2.03
  -6   2  -1   28.47    2.14
   8  -2   1   19.85    2.05
  -8  -2  -1   15.25    2.20
  -8   2  -1   18.46    2.25
  -8   2  -1   17.42    2.16
   8   2   1   15.53    2.12
  10  -2   1   57.40    2.74
 -10  -2  -1   68.88    2.95
  10   2   1   66.75    3.36
 -10   2  -1   64.21    3.00
 -10   2  -1   58.07    2.83
  12  -2   1   90.34    3.41
 -12  -2  -1   92.68    3.62
 -12   2  -1   91.33    3.67
 -12   2  -1   95.35    3.65
  12   2   1   86.83    3.99
  14  -2   1    2.49    1.83
 -14  -2  -1    5.47    1.90
 -14   2  -1    2.49    1.75
 -14   2  -1    4.83    1.87
  14   2   1    4.08    1.88
  16  -2   1    1.15    1.77
 -16  -2  -1   -0.13    1.64
 -16  -2  -1   -0.24    1.63
  16  -2   1    1.92    1.76
 -16   2  -1    2.67    1.72
  16   2   1    1.29    0.76
 -16   2  -1   -0.85    1.57
 -18  -2  -1    4.36    1.97
  18  -2   1    6.82    1.97
 -18  -2  -1    6.61    2.19
  18  -2   1    8.08    2.05
 -18   2  -1    7.34    1.97
 -18   2  -1    7.87    2.04
  18   2   1    4.86    0.95
  20  -2   1   -0.02    1.87
  20  -2   1    3.24    1.98
 -20  -2  -1    5.19    2.26
 -20  -2  -1    7.61    2.10
 -20   2  -1    5.49    2.13
  20   2   1    3.74    1.05
 -20   2  -1    1.81    2.04
 -22  -2  -1   -1.43    2.06
 -22  -2  -1    2.65    2.15
  22  -2   1   -1.03    1.99
  22  -2   1    0.60    1.97
 -22   2  -1   -0.23    2.03
 -22   2  -1    3.55    2.26
 -24  -2  -1   81.52    4.88
  24  -2   1   72.07    4.25
  24  -2   1   72.06    4.16
 -24  -2  -1   79.65    4.65
 -24   2  -1   70.00    4.42
 -24   2  -1   75.27    4.50
 -26  -2  -1   36.54    3.85
  26  -2   1   43.02    3.88
 -26  -2  -1   34.66    3.85
  26  -2   1   37.85    3.59
 -26   2  -1   44.13    4.25
 -26   2  -1   32.18    4.08
 -28  -2  -1   -2.93    2.40
  28  -2   1   -0.83    2.34
  28  -2   1   -0.77    2.32
 -28  -2  -1    1.54    2.71
 -28   2  -1    1.13    2.63
 -28   2  -1    3.53    2.46
 -30  -2  -1   32.63    3.95
  30  -2   1   32.58    3.69
 -30  -2  -1   38.27    4.15
  30  -2   1   34.92    3.83
 -30   2  -1   34.57    4.34
 -30   2  -1   34.67    4.07
 -32  -2  -1   31.90    4.26
  32  -2   1   31.32    3.54
 -32  -2  -1   26.41    4.00
 -32   2  -1   24.14    4.02
 -32   2  -1   31.76    4.47
 -34  -2  -1    6.65    3.40
  34  -2   1   -0.59    2.66
 -34  -2  -1    4.75    2.94
 -34   2  -1    3.63    2.98
 -34   2  -1   -1.14    2.76
 -36  -2  -1    8.74    3.66
 -36  -2  -1    8.31    3.30
  36  -2   1    6.37    2.97
 -36   2  -1    5.84    3.46
 -36   2  -1   15.09    3.78
 -38  -2  -1    0.41    3.29
 -38  -2  -1   -2.86    3.31
 -38   2  -1   -5.03    2.69
 -38   2  -1   -2.37    3.11
 -40  -2  -1   -1.17    3.36
 -40  -2  -1   -1.69    3.42
 -40   2  -1   -2.09    3.25
 -40   2  -1    4.09    3.64
 -41  -3   1    8.70    3.71
 -41  -3   1    0.54    3.55
  41  -3  -1    4.74    3.31
 -41   3   1    2.14    3.55
 -41   3   1    6.36    3.61
 -39  -3   1    8.10    3.85
 -39  -3   1    7.51    3.62
  39  -3  -1    1.30    3.14
 -39   3   1    2.70    3.35
 -39   3   1    4.96    3.16
 -37  -3   1    8.37    3.50
 -37  -3   1    4.78    3.56
  37  -3  -1   -1.85    2.97
 -37   3   1   11.29    3.60
 -37   3   1    3.30    3.27
  35  -3  -1   56.54    4.66
  35  -3  -1   53.74    4.35
 -35  -3   1   60.13    5.50
 -35  -3   1   54.82    4.94
 -35   3   1   65.95    5.12
 -35   3   1   54.36    5.16
  33  -3  -1   21.63    3.39
 -33  -3   1   15.11    3.55
  33  -3  -1   18.29    3.36
 -33  -3   1   14.20    3.74
 -33   3   1   18.65    3.69
 -33   3   1   20.88    3.77
  31  -3  -1   62.28    4.47
 -31  -3   1   64.70    5.18
 -31  -3   1   66.93    4.84
  31  -3  -1   70.77    4.93
 -31   3   1   58.38    4.93
 -31   3   1   61.08    4.70
 -29  -3   1   34.98    4.00
  29  -3  -1   22.87    3.33
 -29   3   1   28.56    4.06
 -29   3   1   33.15    4.04
  29   3  -1   30.41    4.01
 -27  -3   1    1.54    2.61
  27  -3  -1    6.82    2.69
  27   3  -1    1.52    2.54
 -27   3   1    1.79    2.49
 -27   3   1    0.27    2.43
 -25  -3   1   52.35    4.31
  25  -3  -1   54.04    4.06
 -25   3   1   56.37    4.27
 -25   3   1   51.93    3.88
  25   3  -1   47.31    3.92
  23  -3  -1    7.67    2.42
 -23  -3   1    7.26    2.29
 -23   3   1    3.81    2.15
  23   3  -1    3.02    2.14
 -23   3   1    3.40    2.22
 -21  -3   1    1.12    2.04
  21  -3  -1   -0.14    1.83
 -21   3   1    0.13    1.93
  21   3  -1   -0.68    1.82
 -21   3   1   -0.72    1.71
 -19  -3   1   24.79    3.15
  19  -3  -1   21.68    2.56
  19   3  -1   27.79    3.30
  19   3  -1   24.40    2.95
 -19   3   1   24.21    3.05
 -19   3   1   25.13    2.95
 -17  -3   1    0.97    1.66
  17  -3  -1    1.19    1.71
 -17   3   1   -1.73    1.67
 -17   3   1    2.16    1.71
  17   3  -1    2.53    1.91
  17   3  -1    2.39    1.92
  15  -3  -1  134.47    4.41
 -15  -3   1  125.98    4.46
  15   3  -1  129.83    4.86
 -15   3   1  130.18    4.34
 -15   3   1  124.06    4.27
  15   3  -1  129.37    4.81
 -13  -3   1  233.13    6.01
  13  -3  -1  236.02    5.61
  13   3  -1  228.26    6.40
  13   3  -1  224.98    6.18
 -13   3   1  238.12    5.91
 -13   3   1  229.92    5.87
 -11  -3   1    3.57    0.79
 -11  -3   1    2.50    1.61
  11  -3  -1    4.99    1.65
  11   3  -1    1.86    1.71
  11   3  -1    3.35    1.71
 -11   3   1    2.38    1.37
 -11   3   1    0.69    1.40
  -9  -3   1  189.90    3.91
   9   3  -1  189.08    5.02
  -9   3   1  188.95    4.60
   9   3  -1  195.13    5.62
  -9   3   1  190.94    4.69
  -7  -3   1   33.52    1.82
   7   3  -1   26.07    2.39
  -7   3   1   30.90    1.99
  -7   3   1   32.26    2.06
   7   3  -1   36.65    3.11
  -5  -3   1   89.94    2.81
   5   3  -1   87.05    2.93
  -5   3   1   95.29    2.80
   5   3  -1   89.61    3.88
  -5   3   1   95.46    2.40
  -3  -3   1   35.19    2.34
  -3   3   1   38.12    1.89
   3   3  -1   36.22    2.63
  -3   3   1   34.99    2.46
   3   3  -1   35.50    1.95
   3   3  -1   35.09    1.73
  -3   3   1   35.67    1.18
  -1  -3   1   -0.52    1.40
   1   3  -1   -0.18    0.90
  -1   3   1   -0.10    1.39
   1   3  -1   -0.37    1.23
   1   3  -1    2.33    1.68
  -1   3   1   -0.18    1.01
   1   3  -1   -0.21    0.85
  -1  -3  -1   18.54    1.04
   1  -3   1   17.98    2.27
  -1  -3  -1   17.65    1.00
   1   3   1   19.84    2.61
  -1   3  -1   22.07    2.39
  -1   3  -1   18.00    1.48
   1   3   1   21.25    1.42
  -1   3  -1   17.26    2.04
   3  -3   1    7.06    1.71
   3  -3   1    7.70    1.43
   3   3   1    9.19    1.94
  -3   3  -1    8.57    1.17
   3   3   1    8.75    1.20
  -3   3  -1   10.05    1.52
   5  -3   1    0.56    1.37
   5  -3   1    0.05    1.53
  -5   3  -1   -0.13    1.37
   5   3   1   -0.16    1.61
   5   3   1    1.79    1.23
  -5   3  -1    1.26    1.15
   7  -3   1   29.05    2.22
  -7  -3  -1   28.98    1.30
  -7  -3  -1   25.87    2.18
   7   3   1   33.92    2.41
  -7   3  -1   34.04    2.61
  -7   3  -1   31.10    2.13
   9  -3   1   30.11    2.70
  -9  -3  -1   27.48    2.37
  -9   3  -1   32.55    2.42
  -9   3  -1   25.15    2.34
   9   3   1   26.59    2.56
  11  -3   1  373.48    7.91
 -11  -3  -1  381.28    8.30
  11   3   1  400.76    8.73
 -11   3  -1  392.61    8.35
 -11   3  -1  385.80    8.46
  13  -3   1  196.17    5.21
 -13  -3  -1  196.82    5.62
 -13   3  -1  191.10    5.40
  13   3   1  197.17    5.85
 -13   3  -1  198.98    5.61
 -15  -3  -1    4.32    1.88
  15  -3   1    0.83    1.90
 -15   3  -1    1.52    1.54
  15   3   1    1.21    1.73
 -15   3  -1   -0.03    1.76
  17  -3   1  206.04    6.46
  17  -3   1  202.94    5.61
 -17  -3  -1  201.54    6.26
 -17  -3  -1  203.14    6.27
 -17   3  -1  205.06    6.32
  17   3   1  204.20    6.50
 -17   3  -1  206.37    6.28
 -19  -3  -1   55.04    3.63
 -19  -3  -1   56.68    3.85
  19  -3   1   57.61    3.89
  19  -3   1   50.60    3.60
 -19   3  -1   58.83    3.90
 -19   3  -1   50.83    3.78
 -21  -3  -1   20.28    2.86
  21  -3   1   18.17    2.68
  21  -3   1   18.91    2.78
 -21  -3  -1   16.15    2.65
 -21   3  -1   25.67    3.37
 -21   3  -1   23.42    3.33
  23  -3   1   58.52    4.23
 -23  -3  -1   58.37    4.39
 -23  -3  -1   56.84    4.34
  23  -3   1   60.87    4.05
 -23   3  -1   55.89    3.95
 -23   3  -1   47.27    4.12
  25  -3   1    0.74    2.33
  25  -3   1    1.73    2.55
 -25  -3  -1    2.12    2.64
 -25  -3  -1    1.42    2.22
 -25   3  -1    2.59    2.26
 -25   3  -1    2.52    2.57
  27  -3   1    0.64    2.48
 -27  -3  -1   -0.62    2.52
  27  -3   1    1.26    2.40
 -27  -3  -1    1.85    2.69
 -27   3  -1    1.92    2.30
 -27   3  -1   -0.56    2.32
 -29  -3  -1   -2.64    2.28
 -29  -3  -1    0.14    2.57
  29  -3   1    3.26    2.71
  29  -3   1   -0.94    2.40
 -29   3  -1   -1.25    2.53
 -29   3  -1    2.69    2.77
  31  -3   1   13.96    3.30
 -31  -3  -1   13.28    3.54
  31  -3   1   11.77    3.16
 -31  -3  -1   13.65    3.40
 -31   3  -1   17.19    3.38
 -31   3  -1   18.30    3.71
 -33  -3  -1   22.23    4.09
  33  -3   1   26.49    3.51
  33  -3   1   25.13    3.63
 -33  -3  -1   30.39    4.28
 -33   3  -1   34.06    4.23
 -33   3  -1   18.30    3.92
 -35  -3  -1   -0.24    3.24
 -35  -3  -1    3.74    2.96
  35  -3   1   -2.04    2.66
 -35   3  -1   -2.89    2.77
 -35   3  -1   -2.14    3.17
 -37  -3  -1   21.29    4.23
 -37  -3  -1   16.49    4.14
  37  -3   1   18.57    3.64
 -37   3  -1   15.73    3.99
 -37   3  -1   19.06    4.00
 -39  -3  -1   15.15    4.25
 -39  -3  -1   25.49    4.57
 -39   3  -1   12.11    4.01
 -39   3  -1   21.15    4.14
 -40  -4   1    6.11    3.87
  40  -4  -1   -1.45    3.29
 -40  -4   1    3.05    3.43
 -40   4   1    0.93    3.33
 -40   4   1    2.91    3.30
  38  -4  -1   15.63    3.59
 -38  -4   1   15.68    3.85
 -38  -4   1   13.40    4.17
 -38   4   1   10.47    3.70
 -38   4   1   13.88    3.80
  36  -4  -1    5.96    3.19
 -36  -4   1   11.21    3.60
 -36  -4   1    7.27    3.69
  36  -4  -1    8.29    3.27
 -36   4   1    7.82    3.42
 -36   4   1    9.80    3.10
  34  -4  -1    6.02    3.15
 -34  -4   1    9.93    3.33
  34  -4  -1    8.60    3.19
 -34  -4   1    8.06    3.32
 -34   4   1    9.37    3.23
 -34   4   1    3.32    2.81
 -32  -4   1    3.20    2.73
  32  -4  -1    0.30    2.62
 -32  -4   1    1.73    3.04
  32  -4  -1   -0.02    2.80
 -32   4   1    1.61    2.64
 -32   4   1    2.07    2.86
 -30  -4   1    1.38    2.56
  30  -4  -1   10.81    3.09
  30  -4  -1    7.61    2.97
 -30  -4   1   -0.86    2.70
 -30   4   1    6.72    2.78
 -30   4   1   -1.61    2.70
  28  -4  -1   43.13    4.23
 -28  -4   1   42.16    4.09
 -28   4   1   33.77    3.71
 -28   4   1   39.82    3.91
  28   4  -1   36.49    4.35
  26  -4  -1   49.69    4.26
 -26  -4   1   44.48    3.98
 -26   4   1   54.74    4.33
 -26   4   1   47.54    3.94
  26   4  -1   44.79    4.02
 -24  -4   1   15.59    3.03
  24  -4  -1   19.55    3.10
  24   4  -1   13.87    2.77
 -24   4   1   13.68    2.68
 -24   4   1   15.42    2.92
  22  -4  -1  154.13    5.37
 -22  -4   1  159.26    6.06
  22   4  -1  144.41    5.83
 -22   4   1  163.90    5.85
 -22   4   1  151.80    5.82
  20  -4  -1   18.06    2.61
 -20  -4   1   25.15    2.93
 -20   4   1   20.22    2.66
 -20   4   1   23.71    3.04
  20   4  -1   19.68    2.91
  20   4  -1   17.58    2.81
 -18  -4   1   56.00    3.48
  18  -4  -1   56.75    3.58
 -18   4   1   58.05    3.46
  18   4  -1   53.43    3.93
  18   4  -1   56.04    3.81
 -18   4   1   50.91    3.41
  16  -4  -1   64.38    3.62
 -16  -4   1   58.70    3.39
  16   4  -1   59.12    4.00
 -16   4   1   60.27    3.29
  16   4  -1   63.72    3.75
 -16   4   1   63.43    3.47
  14  -4  -1  102.93    3.99
 -14  -4   1  101.89    4.03
 -14   4   1   99.94    3.91
  14   4  -1  101.04    4.18
 -14   4   1   99.54    3.76
  14   4  -1  100.89    4.45
 -12  -4   1   62.79    2.00
  12  -4  -1   54.76    3.21
  12   4  -1   58.71    3.65
  12   4  -1   68.26    3.35
 -12   4   1   61.13    2.87
 -12   4   1   60.11    3.03
  10  -4  -1  189.03    4.79
 -10  -4   1  200.15    4.25
 -10   4   1  195.63    5.09
 -10   4   1  190.98    4.70
  10   4  -1  197.03    5.39
  10   4  -1  185.11    6.06
  -8  -4   1   76.46    2.62
   8   4  -1   66.40    2.98
  -8   4   1   78.05    2.59
   8   4  -1   81.71    3.91
  -8   4   1   71.30    2.99
  -6  -4   1   46.27    2.37
  -6   4   1   45.06    1.86
   6   4  -1   46.21    2.36
  -6   4   1   42.27    2.21
   6   4  -1   42.06    3.10
  -4  -4   1   42.81    2.44
   4   4  -1   42.16    2.14
  -4   4   1   46.86    2.26
  -4   4   1   44.34    1.43
  -4   4   1   44.95    2.77
   4   4  -1   44.78    3.33
  -2  -4   1  110.74    3.79
   2   4  -1  109.43    4.29
  -2   4   1  114.92    3.16
  -2   4   1  117.61    4.09
   2   4  -1  111.67    3.00
   2   4  -1  116.41    2.81
   0  -4   1  104.80    3.92
   0   4  -1  111.50    3.65
   0   4  -1  112.06    2.69
   0   4  -1  107.62    3.89
   0   4  -1  109.72    2.87
   0   4   1  109.37    2.45
   0   4   1  114.88    4.02
   2  -4   1  124.37    4.41
  -2   4  -1  120.40    4.07
  -2   4  -1  116.27    3.73
  -2   4  -1  118.40    2.92
   2   4   1  115.02    4.45
   2   4   1  120.49    2.98
   4  -4   1  658.07   11.26
   4  -4   1  662.93   13.21
  -4   4  -1  667.37   11.65
   4   4   1  669.18   13.61
  -4   4  -1  655.85   12.81
  -4   4  -1  658.90   12.21
   4   4   1  655.82   11.87
   6  -4   1  108.68    4.55
   6  -4   1  110.35    3.73
  -6   4  -1  119.22    3.83
   6   4   1  122.03    4.59
   6   4   1  118.27    3.56
  -6   4  -1  117.70    3.92
  -6   4  -1  121.29    3.41
   8  -4   1  157.63    4.59
  -8  -4  -1  160.53    3.54
  -8  -4  -1  167.06    4.51
   8   4   1  149.26    5.33
   8   4   1  158.41    4.66
  -8   4  -1  163.00    4.25
  -8   4  -1  166.82    4.37
  -8   4  -1  159.33    4.73
 -10  -4  -1  305.87    5.48
 -10  -4  -1  299.91    7.00
  10  -4   1  320.00    6.87
  10   4   1  301.59    7.22
 -10   4  -1  303.52    7.24
 -10   4  -1  308.11    6.90
 -10   4  -1  311.84    6.50
 -12  -4  -1   18.33    2.46
  12  -4   1   13.71    2.25
 -12   4  -1   16.85    1.77
 -12   4  -1   20.02    2.68
 -12   4  -1   15.33    2.01
  12   4   1   17.52    2.23
  14  -4   1   -1.09    1.82
 -14  -4  -1    1.65    1.73
  14  -4   1    4.75    2.02
 -14   4  -1    2.53    1.56
 -14   4  -1    1.74    1.73
  14   4   1    0.41    1.74
 -14   4  -1    3.28    0.96
 -16  -4  -1    0.53    1.68
  16  -4   1    0.95    2.20
  16  -4   1    0.85    1.85
  16   4   1    1.97    1.83
 -16   4  -1    5.09    1.84
 -16   4  -1    4.52    1.99
  18  -4   1    9.67    2.47
 -18  -4  -1   13.51    2.34
  18  -4   1    3.50    2.11
 -18  -4  -1   10.22    2.12
 -18   4  -1    6.39    2.09
 -18   4  -1    7.97    2.03
  18   4   1    5.82    2.24
  20  -4   1   33.24    3.69
 -20  -4  -1   37.21    3.68
 -20  -4  -1   35.05    3.61
  20  -4   1   33.18    3.47
 -20   4  -1   38.12    3.67
 -20   4  -1   36.44    3.39
  22  -4   1   -2.13    2.28
 -22  -4  -1   -1.56    2.15
  22  -4   1    2.98    2.34
 -22  -4  -1    2.19    2.32
 -22   4  -1   -0.16    1.89
 -22   4  -1   -1.55    2.22
  24  -4   1   55.43    4.48
 -24  -4  -1   49.42    4.00
 -24  -4  -1   50.78    4.09
  24  -4   1   60.26    4.33
 -24   4  -1   54.34    3.96
 -24   4  -1   55.12    4.51
 -26  -4  -1   24.36    3.65
  26  -4   1   35.86    4.09
  26  -4   1   35.11    4.04
 -26  -4  -1   29.14    4.18
 -26   4  -1   35.87    3.98
 -26   4  -1   30.94    3.78
 -28  -4  -1    2.39    2.48
  28  -4   1    2.78    2.73
 -28  -4  -1    4.56    2.94
  28  -4   1    4.68    2.76
 -28   4  -1    5.82    2.73
 -28   4  -1    2.20    2.58
 -30  -4  -1   84.22    5.72
  30  -4   1  104.52    5.76
 -30  -4  -1   84.83    5.62
  30  -4   1   85.70    5.03
 -30   4  -1   83.47    5.44
 -30   4  -1   84.11    5.56
  32  -4   1   46.65    4.74
 -32  -4  -1   36.00    4.84
  32  -4   1   39.43    4.29
 -32  -4  -1   43.61    4.55
 -32   4  -1   37.05    4.80
 -32   4  -1   38.61    4.31
 -34  -4  -1   15.05    3.68
  34  -4   1   16.06    3.70
 -34  -4  -1   14.39    3.92
  34  -4   1   15.07    3.47
 -34   4  -1   17.58    3.72
 -34   4  -1   15.86    3.83
 -36  -4  -1   21.58    4.25
 -36  -4  -1   17.24    4.13
  36  -4   1   17.51    3.77
 -36   4  -1   15.67    4.05
 -36   4  -1   17.62    4.03
  38  -4   1    5.64    3.59
 -38  -4  -1   -0.26    3.19
 -38  -4  -1    9.48    3.76
 -38   4  -1    5.64    3.84
 -38   4  -1    0.23    3.18
  39  -5  -1   -0.42    3.29
 -39  -5   1    2.33    3.43
 -39  -5   1    0.88    3.68
 -39   5   1   -3.91    2.62
 -39   5   1   -0.97    3.35
  37  -5  -1   25.48    4.06
 -37  -5   1   25.46    4.32
 -37  -5   1   25.13    4.50
  37  -5  -1   30.54    4.42
 -37   5   1   27.92    4.46
 -37   5   1   26.15    4.18
 -35  -5   1   43.88    4.66
  35  -5  -1   43.00    4.68
  35  -5  -1   52.55    5.08
 -35  -5   1   50.35    4.98
 -35   5   1   50.67    4.66
 -35   5   1   49.40    4.79
 -33  -5   1   16.66    3.92
  33  -5  -1   10.82    3.49
  33  -5  -1    9.14    3.41
 -33  -5   1    8.96    3.28
 -33   5   1    6.71    3.24
 -33   5   1    8.61    3.07
  31  -5  -1   25.68    3.76
 -31  -5   1   21.65    3.78
 -31  -5   1   19.45    3.59
  31  -5  -1   21.68    3.73
 -31   5   1   26.75    3.77
 -31   5   1   16.93    3.60
  29  -5  -1   74.18    5.41
 -29  -5   1   80.16    5.18
  29  -5  -1   81.95    5.20
 -29   5   1   74.79    5.21
  29   5  -1   80.15    5.48
 -29   5   1   77.94    5.03
  27  -5  -1   16.20    3.34
 -27  -5   1   15.48    3.31
  27   5  -1   18.60    3.27
 -27   5   1   18.23    3.13
 -27   5   1    9.13    2.96
  25  -5  -1   17.12    3.23
 -25  -5   1   21.28    3.17
  25   5  -1   17.20    3.20
 -25   5   1   21.09    3.19
 -25   5   1   17.16    2.99
  23  -5  -1    9.77    2.88
 -23  -5   1   10.54    2.80
 -23   5   1   13.98    2.60
  23   5  -1   12.83    2.89
 -23   5   1   11.48    2.68
  21  -5  -1   17.64    2.84
 -21  -5   1   19.30    2.93
  21   5  -1   18.03    2.93
  21   5  -1   17.97    3.18
 -21   5   1   18.19    2.63
 -21   5   1   14.88    2.57
 -19  -5   1    2.16    2.09
  19  -5  -1    0.62    2.21
 -19   5   1    3.09    1.81
 -19   5   1    2.31    1.97
  19   5  -1    2.24    1.97
  19   5  -1    2.40    2.42
  17  -5  -1   29.77    3.28
 -17  -5   1   31.72    2.98
 -17   5   1   30.85    2.97
 -17   5   1   32.90    2.80
  17   5  -1   27.47    3.64
  17   5  -1   32.53    3.26
  15  -5  -1   40.74    3.25
 -15  -5   1   35.42    3.24
 -15  -5   1   39.94    1.52
 -15   5   1   42.62    2.99
  15   5  -1   34.67    3.09
  15   5  -1   45.86    4.02
 -15   5   1   36.68    2.62
 -13  -5   1   51.03    2.02
  13  -5  -1   50.19    3.29
 -13   5   1   45.84    3.10
  13   5  -1   53.96    4.09
  13   5  -1   50.58    3.14
 -13   5   1   45.26    2.69
  11  -5  -1   14.78    2.08
 -11  -5   1   16.09    1.74
  11   5  -1   22.36    3.00
 -11   5   1   17.96    2.39
  11   5  -1   15.75    2.07
 -11   5   1   17.57    1.90
   9  -5  -1  263.04    5.98
  -9  -5   1  260.65    5.79
  -9   5   1  263.32    5.58
   9   5  -1  260.39    7.50
   9   5  -1  264.99    6.35
  -9   5   1  256.70    6.08
  -7  -5   1   92.46    3.35
  -7   5   1   92.18    2.60
   7   5  -1   90.29    3.27
  -7   5   1   89.90    3.32
   7   5  -1   86.88    4.23
  -5  -5   1   65.49    3.06
  -5   5   1   63.03    1.82
   5   5  -1   60.85    3.66
   5   5  -1   59.29    2.59
  -5   5   1   61.21    2.72
  -5   5   1   61.00    3.50
  -3  -5   1   75.58    3.50
  -3   5   1   86.54    3.80
   3   5  -1   80.55    2.72
   3   5  -1   81.75    2.45
   3   5  -1   90.18    4.09
  -3   5   1   74.68    2.99
  -1  -5   1   54.43    3.29
   1   5  -1   60.25    2.22
   1   5  -1   54.55    1.95
   1   5  -1   55.51    3.40
  -1   5   1   54.75    3.24
   1  -5   1   -0.68    1.78
   1   5   1    1.62    0.90
   1   5   1    2.71    1.96
  -1   5  -1    2.13    1.86
  -1   5  -1   -0.76    1.37
  -1   5  -1    0.35    1.00
  -1   5  -1    2.13    0.92
   3  -5   1   68.59    3.66
  -3   5  -1   66.96    2.32
   3   5   1   67.15    3.71
   3   5   1   71.55    2.50
  -3   5  -1   73.59    3.59
  -3   5  -1   72.33    3.11
   5  -5   1  101.21    4.32
   5  -5   1  101.51    3.59
   5   5   1  100.45    3.20
  -5   5  -1  103.40    3.89
  -5   5  -1  104.11    3.03
   5   5   1  102.66    4.73
  -5   5  -1   98.40    3.71
  -7  -5  -1   75.48    2.72
   7  -5   1   78.26    3.45
   7  -5   1   73.31    3.95
  -7   5  -1   76.91    3.46
  -7   5  -1   77.81    3.45
  -7   5  -1   79.22    2.91
   7   5   1   80.83    3.19
   7   5   1   70.01    4.04
   9  -5   1    0.57    2.08
  -9  -5  -1    1.59    1.47
  -9  -5  -1    2.74    0.96
   9  -5   1    0.95    1.74
  -9   5  -1    0.81    1.28
  -9   5  -1   -1.18    1.54
  -9   5  -1   -0.41    1.43
   9   5   1    0.13    1.36
 -11  -5  -1  160.72    3.46
  11  -5   1  148.92    5.87
  11  -5   1  156.67    5.01
 -11  -5  -1  165.12    4.95
  11   5   1  157.60    5.05
 -11   5  -1  162.00    4.62
 -11   5  -1  161.72    5.00
 -11   5  -1  163.35    4.45
 -13  -5  -1   80.15    3.76
  13  -5   1   76.28    3.68
  13  -5   1   80.85    4.34
 -13   5  -1   76.63    2.89
 -13   5  -1   75.15    3.81
  13   5   1   76.05    3.78
 -13   5  -1   74.84    3.42
  15  -5   1   13.08    2.39
  15  -5   1   15.19    2.78
 -15  -5  -1   14.27    2.35
 -15  -5  -1   11.46    1.97
 -15   5  -1   11.30    2.32
 -15   5  -1   15.05    1.68
 -15   5  -1   13.42    2.15
  15   5   1   14.92    2.38
  17  -5   1  240.87    6.84
 -17  -5  -1  245.53    6.80
 -17  -5  -1  233.37    6.95
  17  -5   1  237.79    7.64
  17   5   1  242.14    7.21
 -17   5  -1  229.15    7.03
 -17   5  -1  222.99    6.65
  19  -5   1  109.18    4.98
 -19  -5  -1   91.09    4.57
  19  -5   1   90.99    5.28
 -19  -5  -1   95.40    4.74
 -19   5  -1   92.54    4.78
 -19   5  -1   97.35    4.57
 -21  -5  -1   12.09    2.82
  21  -5   1   14.36    3.18
 -21  -5  -1   18.34    2.79
  21  -5   1   17.38    3.18
 -21   5  -1   17.05    2.79
 -21   5  -1   24.95    3.53
 -23  -5  -1   29.99    3.42
  23  -5   1   28.34    3.54
  23  -5   1   34.37    4.34
 -23  -5  -1   32.89    3.94
 -23   5  -1   29.50    3.66
 -23   5  -1   34.13    3.88
 -25  -5  -1   20.87    3.28
 -25  -5  -1   25.38    3.64
  25  -5   1   32.71    4.16
  25  -5   1   24.88    3.68
 -25   5  -1   28.31    3.96
 -25   5  -1   24.31    3.36
  27  -5   1   -2.46    2.84
 -27  -5  -1    4.55    2.75
  27  -5   1   -2.23    2.71
 -27  -5  -1    5.10    2.75
 -27   5  -1   -0.12    2.74
 -27   5  -1    3.83    2.46
 -29  -5  -1   20.95    3.78
 -29  -5  -1   18.33    3.53
  29  -5   1   27.01    4.05
  29  -5   1   23.62    3.66
 -29   5  -1   24.76    3.81
 -29   5  -1   20.92    3.51
 -31  -5  -1   36.32    4.78
 -31  -5  -1   42.25    4.72
  31  -5   1   31.82    4.06
  31  -5   1   37.29    4.73
 -31   5  -1   35.27    4.53
 -31   5  -1   34.05    4.63
 -33  -5  -1   18.79    4.04
 -33  -5  -1   20.20    3.91
  33  -5   1   13.61    3.76
  33  -5   1   15.67    3.71
 -33   5  -1   19.89    4.01
 -33   5  -1   14.07    3.65
  35  -5   1    9.60    3.60
 -35  -5  -1   -0.22    3.36
 -35  -5  -1   -0.82    2.83
  35  -5   1   -2.04    3.08
 -35   5  -1    1.91    3.38
 -35   5  -1    7.61    3.21
 -37  -5  -1   34.40    4.93
  37  -5   1   42.97    4.73
 -37  -5  -1   40.52    5.45
 -37   5  -1   35.04    4.85
 -37   5  -1   50.48    5.49
 -38  -6   1    5.06    3.50
 -38  -6   1    1.26    3.70
  38  -6  -1    4.33    3.65
  38  -6  -1    3.15    3.70
 -38   6   1    6.01    3.40
 -38   6   1    4.87    3.69
 -36  -6   1   12.44    4.17
 -36  -6   1   12.64    3.71
  36  -6  -1   20.04    4.29
  36  -6  -1   15.98    4.05
 -36   6   1   18.99    4.02
 -36   6   1   25.14    4.21
  34  -6  -1   20.55    3.98
  34  -6  -1   15.29    3.92
 -34  -6   1   13.90    3.96
 -34  -6   1   18.24    3.77
 -34   6   1   19.21    3.89
 -34   6   1   16.57    3.58
 -32  -6   1   -1.97    2.96
  32  -6  -1    3.06    3.29
 -32  -6   1    0.15    2.80
  32  -6  -1   -4.80    2.81
 -32   6   1   -5.63    2.37
 -32   6   1   -3.94    2.72
 -30  -6   1   49.83    4.99
  30  -6  -1   45.50    4.82
 -30  -6   1   51.13    4.82
  30  -6  -1   46.10    4.95
 -30   6   1   53.31    4.76
 -30   6   1   46.68    4.45
 -28  -6   1   50.93    4.82
  28  -6  -1   50.46    4.99
  28  -6  -1   56.10    4.94
  28   6  -1   45.14    4.59
 -28   6   1   47.22    4.44
 -28   6   1   51.78    4.33
 -26  -6   1    2.50    2.55
  26  -6  -1    3.12    3.06
 -26   6   1    0.40    2.47
  26   6  -1    0.23    2.64
 -26   6   1    4.19    2.49
 -24  -6   1   17.20    3.10
  24  -6  -1   16.33    3.32
 -24   6   1   14.82    2.95
 -24   6   1    9.18    2.50
  24   6  -1   18.38    3.28
 -22  -6   1  101.25    5.26
  22  -6  -1   94.93    4.87
 -22   6   1   97.44    4.74
 -22   6   1   93.70    4.85
  22   6  -1  102.11    5.23
 -20  -6   1   70.41    4.46
  20  -6  -1   76.19    4.64
  20   6  -1   66.96    4.93
 -20   6   1   68.68    4.11
  20   6  -1   74.68    4.50
 -20   6   1   71.13    4.05
 -18  -6   1    5.51    2.37
  18  -6  -1   11.33    2.66
  18   6  -1    7.98    2.73
  18   6  -1    6.81    2.35
 -18   6   1    6.93    2.15
 -18   6   1    9.00    2.07
 -16  -6   1   81.45    4.28
  16  -6  -1   73.30    3.87
  16   6  -1   72.23    4.93
  16   6  -1   84.54    4.33
 -16   6   1   69.52    3.72
 -16   6   1   76.75    3.54
 -14  -6   1   75.76    2.60
  14  -6  -1   75.14    3.92
 -14   6   1   72.84    3.72
  14   6  -1   65.88    4.75
  14   6  -1   73.77    3.89
 -14   6   1   74.64    3.22
  12  -6  -1    2.81    1.89
 -12  -6   1    3.61    1.34
 -12   6   1    1.64    1.25
 -12   6   1    2.79    1.59
  12   6  -1    4.70    1.71
  12   6  -1    5.58    2.34
 -10  -6   1   59.29    2.94
  10  -6  -1   68.65    3.36
 -10   6   1   67.76    2.59
  10   6  -1   64.41    4.44
 -10   6   1   69.30    3.33
  10   6  -1   63.75    3.10
  -8  -6   1   74.63    3.35
   8   6  -1   67.33    4.20
   8   6  -1   79.54    3.22
  -8   6   1   77.65    2.45
  -8   6   1   77.44    3.29
  -6  -6   1    4.89    1.59
   6   6  -1    3.51    2.29
  -6   6   1    4.76    0.81
  -6   6   1    1.74    1.38
   6   6  -1    6.43    1.37
  -4  -6   1   39.20    3.10
   4   6  -1   43.36    3.46
  -4   6   1   47.87    3.35
  -4   6   1   41.12    2.50
   4   6  -1   40.57    2.31
  -2  -6   1   76.91    3.80
  -2   6   1   68.28    3.94
   2   6  -1   74.44    4.20
   2   6  -1   73.43    2.56
   2   6  -1   75.30    2.26
   0  -6   1    4.57    1.96
   0   6  -1    6.30    0.98
   0   6   1    6.25    2.16
   0   6  -1    5.91    1.12
   0   6   1    8.75    1.13
   0   6  -1    6.29    2.19
   2  -6   1   10.20    2.30
  -2   6  -1    9.50    1.37
  -2   6  -1   11.12    1.79
  -2   6  -1    8.33    2.12
  -2   6  -1   10.69    1.19
   2   6   1    9.69    2.41
   2   6   1   10.79    1.46
  -4  -6  -1  138.88    3.10
   4  -6   1  138.07    5.26
  -4  -6  -1  141.95    4.48
  -4   6  -1  138.81    3.48
  -4   6  -1  132.37    4.42
  -4   6  -1  141.19    4.97
   4   6   1  147.61    5.69
   4   6   1  140.47    3.71
  -4   6  -1  134.00    3.37
  -6  -6  -1   35.43    2.49
   6  -6   1   32.22    3.39
   6  -6   1   37.44    3.05
  -6  -6  -1   38.68    1.94
  -6   6  -1   33.92    2.11
   6   6   1   38.62    2.42
   6   6   1   42.24    3.87
  -6   6  -1   40.45    2.99
  -6   6  -1   36.34    2.92
  -8  -6  -1   28.05    1.93
  -8  -6  -1   29.56    2.23
   8  -6   1   29.43    2.91
   8  -6   1   23.57    3.22
  -8   6  -1   28.92    2.76
  -8   6  -1   27.42    2.12
   8   6   1   29.39    2.41
  -8   6  -1   27.60    2.79
 -10  -6  -1  117.04    3.72
 -10  -6  -1  121.10    3.44
 -10  -6  -1  116.83    4.19
  10  -6   1  117.70    5.52
  10  -6   1  122.37    4.35
 -10   6  -1  114.17    4.18
 -10   6  -1  120.21    3.85
  10   6   1  125.92    4.33
 -10   6  -1  122.44    4.55
  12  -6   1   86.35    5.06
 -12  -6  -1   91.75    3.49
 -12  -6  -1   91.60    3.95
 -12  -6  -1   91.23    2.70
  12  -6   1  106.64    4.44
  12   6   1   94.55    4.14
 -12   6  -1   88.30    4.16
 -12   6  -1   91.27    3.60
 -12   6  -1   92.33    3.70
  14  -6   1    4.13    2.30
 -14  -6  -1   -2.74    1.79
  14  -6   1   -1.18    2.12
 -14  -6  -1    0.44    1.42
 -14   6  -1   -1.50    1.45
 -14   6  -1    2.24    1.39
 -14   6  -1    2.33    1.93
  14   6   1   -0.91    1.71
 -16  -6  -1   40.91    3.39
 -16  -6  -1   46.60    3.19
  16  -6   1   44.38    3.96
  16  -6   1   41.07    4.00
  16   6   1   39.78    3.45
 -16   6  -1   38.68    3.03
 -16   6  -1   43.44    3.54
 -18  -6  -1   91.41    4.64
 -18  -6  -1   88.89    4.43
  18  -6   1   68.57    4.85
  18  -6   1   78.57    4.79
 -18   6  -1   85.57    4.62
 -18   6  -1   95.53    4.33
  20  -6   1   16.57    3.44
 -20  -6  -1   15.17    2.76
 -20  -6  -1   14.68    2.83
  20  -6   1   20.02    3.16
 -20   6  -1   14.23    2.88
 -20   6  -1   14.27    2.64
  22  -6   1   22.96    3.56
  22  -6   1   17.32    3.39
 -22  -6  -1   22.64    3.05
 -22  -6  -1   19.26    3.19
 -22   6  -1   23.28    3.38
 -22   6  -1   20.70    2.97
 -24  -6  -1   54.86    4.43
  24  -6   1   62.52    4.86
  24  -6   1   59.16    4.48
 -24  -6  -1   61.95    4.69
 -24   6  -1   68.19    4.52
 -24   6  -1   61.96    4.72
 -26  -6  -1   34.47    4.06
  26  -6   1   34.21    4.61
 -26  -6  -1   42.72    4.42
  26  -6   1   38.77    4.58
 -26   6  -1   35.68    4.02
 -26   6  -1   37.56    4.35
 -28  -6  -1   -2.13    2.68
  28  -6   1   -3.65    3.01
 -28  -6  -1   -5.09    2.33
  28  -6   1    3.78    3.10
 -28   6  -1    1.34    2.49
 -28   6  -1   -1.76    2.61
  30  -6   1   32.62    4.27
  30  -6   1   43.39    5.09
 -30  -6  -1   30.52    4.29
 -30  -6  -1   42.84    4.68
 -30   6  -1   35.01    4.60
 -30   6  -1   35.67    4.44
 -32  -6  -1   20.55    3.84
  32  -6   1   24.09    4.36
 -32  -6  -1   15.79    4.03
  32  -6   1   23.23    4.07
 -32   6  -1   23.85    3.87
 -32   6  -1   21.87    3.88
 -34  -6  -1    0.03    3.07
 -34  -6  -1   -2.87    3.19
  34  -6   1   -3.67    3.24
  34  -6   1   -6.59    3.17
 -34   6  -1    2.34    2.96
 -34   6  -1   -4.95    2.81
  36  -6   1    7.38    3.64
 -36  -6  -1    8.17    3.99
 -36  -6  -1    0.83    3.30
  36  -6   1   14.97    3.99
 -36   6  -1    7.99    3.82
 -36   6  -1    7.64    3.50
  37  -7  -1    4.69    3.86
 -37  -7   1    2.72    3.72
 -37  -7   1   15.14    3.86
 -37   7   1    3.30    3.41
  35  -7  -1   18.07    4.26
 -35  -7   1    4.82    3.31
 -35  -7   1   12.75    4.03
 -35   7   1   14.12    3.56
 -35   7   1   11.98    3.75
  33  -7  -1    7.23    3.62
 -33  -7   1    6.24    3.52
 -33  -7   1    6.14    3.24
 -33   7   1    4.88    2.93
 -33   7   1    5.44    3.45
 -31  -7   1    5.06    3.33
  31  -7  -1    2.63    3.22
 -31  -7   1   -0.73    2.77
 -31   7   1    0.26    2.56
 -31   7   1    3.59    2.89
 -29  -7   1   33.79    4.54
 -29  -7   1   35.60    4.41
  29  -7  -1   25.85    4.38
 -29   7   1   36.52    4.28
 -29   7   1   33.26    4.26
 -27  -7   1   28.04    3.89
  27  -7  -1   33.88    4.42
 -27  -7   1   33.90    4.15
 -27   7   1   33.38    4.06
  27   7  -1   32.53    4.18
 -27   7   1   28.86    3.85
  25  -7  -1   -2.04    2.89
 -25  -7   1    1.25    2.43
 -25   7   1    3.63    2.51
  25   7  -1    2.36    2.63
 -25   7   1    1.97    2.19
 -23  -7   1   46.94    4.23
 -23   7   1   40.85    3.89
 -23   7   1   43.03    3.76
  23   7  -1   34.88    3.91
 -21  -7   1   92.92    5.17
 -21   7   1  101.81    4.64
 -21   7   1   90.93    4.74
  21   7  -1  101.61    5.13
 -19  -7   1    2.13    2.38
 -19   7   1    3.39    2.24
  19   7  -1    3.15    2.21
  19   7  -1   -1.41    2.52
 -19   7   1    7.94    2.07
 -17  -7   1   46.29    3.83
  17   7  -1   40.68    3.54
  17   7  -1   38.76    4.08
 -17   7   1   43.10    3.01
 -17   7   1   46.94    3.50
  15   7  -1   31.36    3.88
  15   7  -1   26.75    3.29
 -15   7   1   33.31    2.69
 -15   7   1   33.37    3.25
  13   7  -1   -0.72    1.66
 -13   7   1   -0.75    1.32
 -13   7   1    1.76    1.78
  13   7  -1    3.52    2.53
 -11  -7   1   25.04    2.55
 -11   7   1   21.56    1.91
 -11   7   1   25.22    2.75
  11   7  -1   18.53    3.35
  11   7  -1   21.78    2.62
  -9  -7   1   61.92    3.30
   9   7  -1   74.40    3.38
   9   7  -1   73.79    4.91
  -9   7   1   66.62    3.39
  -9   7   1   71.78    2.44
  -7  -7   1   43.39    2.97
   7   7  -1   41.43    2.64
  -7   7   1   41.52    1.62
   7   7  -1   48.83    4.25
  -7   7   1   43.78    2.84
  -5  -7   1    1.63    1.75
   5   7  -1    0.08    1.28
   5   7  -1   -0.58    2.04
  -5   7   1    1.53    1.47
  -3  -7   1  100.06    4.36
   3   7  -1   92.92    3.08
   3   7  -1   94.13    4.72
  -1  -7   1  141.44    5.36
   1   7  -1  138.38    5.51
   1   7  -1  138.10    3.50
   1  -7   1    4.90    2.22
  -1  -7  -1    8.35    2.12
  -1   7  -1    6.48    0.95
   1   7   1    3.87    2.17
  -1   7  -1    4.56    1.10
  -1   7  -1    8.31    2.42
   3  -7   1   77.11    4.43
  -3  -7  -1   71.16    3.83
  -3   7  -1   70.72    2.40
  -3   7  -1   79.11    3.63
   3   7   1   74.60    2.57
  -3   7  -1   68.77    4.15
  -3   7  -1   76.54    2.35
  -5  -7  -1  149.14    4.92
   5  -7   1  159.68    6.15
  -5   7  -1  151.37    3.70
  -5   7  -1  151.07    5.65
  -5   7  -1  160.39    5.16
  -5   7  -1  157.16    3.79
   5   7   1  149.51    4.13
   7  -7   1   16.56    2.89
  -7  -7  -1   17.77    1.76
  -7  -7  -1   15.31    2.02
  -7   7  -1   19.52    2.61
   7   7   1   17.14    2.17
  -7   7  -1   13.22    2.28
  -7   7  -1   15.94    1.85
  -9  -7  -1  147.32    4.41
   9  -7   1  159.14    6.30
  -9  -7  -1  151.20    4.09
  -9   7  -1  141.14    5.10
  -9   7  -1  147.33    4.20
   9   7   1  149.75    4.67
  -9   7  -1  146.60    5.20
  11  -7   1   95.72    5.29
 -11  -7  -1   97.93    4.30
 -11  -7  -1  108.73    3.71
 -11   7  -1  106.09    3.80
 -11   7  -1  108.02    4.46
  11   7   1  106.76    4.36
 -11   7  -1  110.14    4.80
 -13  -7  -1   18.42    2.25
  13  -7   1   17.93    3.18
 -13  -7  -1   21.45    2.68
 -13   7  -1   19.66    2.54
 -13   7  -1   18.18    2.77
 -13   7  -1   23.66    2.65
  13   7   1   16.96    2.49
  15  -7   1    1.01    2.72
 -15  -7  -1    2.14    2.12
 -15  -7  -1    1.57    1.71
 -15   7  -1    4.15    2.20
 -15   7  -1    4.13    1.80
 -17  -7  -1    3.84    1.96
 -17  -7  -1    3.15    2.21
  17  -7   1    4.27    2.73
 -17   7  -1    6.31    2.07
 -17   7  -1    8.94    2.54
 -19  -7  -1   25.23    3.40
  19  -7   1   19.02    3.57
 -19  -7  -1   32.35    3.82
 -19   7  -1   25.58    3.24
 -19   7  -1   24.57    3.33
  21  -7   1    4.98    3.18
 -21  -7  -1    4.90    2.52
 -21  -7  -1    1.12    2.26
 -21   7  -1    3.19    2.52
 -21   7  -1    1.53    2.21
  23  -7   1   32.28    4.63
 -23  -7  -1   40.02    3.89
 -23  -7  -1   28.81    3.93
 -23   7  -1   38.25    4.16
 -23   7  -1   34.54    3.67
 -25  -7  -1   63.67    4.66
  25  -7   1   73.00    5.78
 -25  -7  -1   74.65    5.12
 -25   7  -1   75.28    5.15
 -25   7  -1   71.78    4.69
 -27  -7  -1    8.48    2.87
  27  -7   1    2.47    3.33
 -27  -7  -1    0.58    2.81
 -27   7  -1    4.72    2.95
 -27   7  -1    4.91    2.68
  29  -7   1   34.07    4.78
 -29  -7  -1   32.23    4.52
 -29  -7  -1   27.50    4.00
 -29   7  -1   32.58    4.11
 -29   7  -1   27.26    4.11
 -31  -7  -1   37.30    4.73
  31  -7   1   38.73    5.34
 -31  -7  -1   39.23    5.00
 -31   7  -1   41.99    4.61
 -31   7  -1   35.86    4.67
  33  -7   1    9.45    3.69
 -33  -7  -1    9.24    3.41
 -33  -7  -1    5.82    3.60
  33  -7   1    5.29    3.67
 -33   7  -1    5.80    3.11
 -33   7  -1    9.87    3.60
 -35  -7  -1    0.21    3.13
  35  -7   1   -3.08    3.28
 -35  -7  -1    4.21    3.65
  35  -7   1   -3.26    3.52
 -35   7  -1    3.75    3.60
 -35   7  -1   -1.89    2.92
 -34  -8   1   14.26    4.07
  34  -8  -1   14.21    4.06
 -34   8   1   10.78    3.60
 -32  -8   1   -2.09    3.12
  32  -8  -1    0.50    3.42
 -32   8   1    1.96    3.11
 -30  -8   1   28.73    4.34
  30  -8  -1   28.87    4.78
 -30   8   1   21.32    3.79
 -28  -8   1   13.92    3.51
  28  -8  -1   17.77    4.20
 -28   8   1   12.50    3.12
 -26  -8   1    4.24    2.96
  26  -8  -1    5.97    3.22
  26   8  -1    6.62    2.83
 -26   8   1    6.43    2.77
 -24  -8   1   10.91    3.03
  24  -8  -1   10.38    3.30
  24   8  -1    2.22    2.55
 -24   8   1    1.77    2.49
 -22  -8   1   14.78    3.20
  22  -8  -1   18.78    3.85
  22   8  -1   17.59    3.10
 -22   8   1   12.36    2.78
  20  -8  -1    2.14    2.76
 -20  -8   1   -1.04    2.33
 -20   8   1    3.27    2.29
  20   8  -1    2.06    2.29
 -18  -8   1    7.51    2.60
 -18   8   1    2.86    2.24
  18   8  -1    8.01    2.37
  18   8  -1    6.16    3.02
 -16  -8   1   13.55    2.72
  16   8  -1   14.23    3.59
 -16   8   1   17.16    2.58
  16   8  -1    9.68    2.41
  14   8  -1   11.90    3.26
 -14   8   1   13.20    2.31
  14   8  -1   16.53    2.52
  12   8  -1   18.32    3.58
 -12   8   1   13.85    2.42
  12   8  -1   18.06    2.48
 -10  -8   1   11.75    2.24
  10   8  -1   10.25    3.18
 -10   8   1   11.28    2.15
  10   8  -1   14.99    2.11
  -8  -8   1   68.05    3.85
   8   8  -1   59.26    3.18
   8   8  -1   55.10    4.52
  -8   8   1   60.34    3.39
  -6  -8   1    1.84    2.03
   6   8  -1    1.33    1.42
  -6   8   1    1.52    1.61
   6   8  -1    2.64    2.68
  -4  -8   1  108.92    4.75
   4   8  -1  104.94    3.44
   4   8  -1   99.58    5.53
  -2  -8   1   62.84    4.09
   2  -8  -1   48.73    4.05
   2   8  -1   51.44    4.13
   0  -8   1    8.83    2.59
   0  -8  -1   14.16    2.61
   0   8  -1    3.43    2.57
  -2  -8  -1   21.22    3.12
   2  -8   1   16.53    2.82
  -2   8  -1   15.92    2.78
   4  -8   1    2.91    2.52
  -4  -8  -1    4.53    2.09
  -4   8  -1    2.59    2.34
  -4   8  -1    3.36    1.87
  -6  -8  -1    8.16    2.09
   6  -8   1    5.89    2.72
  -6   8  -1    8.66    2.20
  -6   8  -1    7.11    2.48
  -8  -8  -1    5.09    1.92
   8  -8   1    2.40    2.67
  -8   8  -1    3.95    1.97
  -8   8  -1    3.53    2.26
  10  -8   1    6.57    3.05
 -10   8  -1    6.24    2.15
 -10   8  -1    8.67    2.34
 -12  -8  -1  115.60    4.72
  12  -8   1  125.30    6.43
 -12   8  -1  113.97    4.95
 -12   8  -1  111.11    4.80
  14  -8   1   43.13    4.86
 -14  -8  -1   45.05    3.72
 -14   8  -1   40.81    3.93
  16  -8   1   24.25    3.76
 -16  -8  -1   22.62    3.20
 -16   8  -1   25.59    3.45
 -18  -8  -1   52.64    4.04
  18  -8   1   55.31    5.19
 -18   8  -1   55.12    4.19
 -20  -8  -1    1.45    2.42
  20  -8   1    1.12    2.74
 -20   8  -1    4.35    2.61
  22  -8   1    7.84    3.25
 -22  -8  -1   11.79    3.06
 -22   8  -1   13.31    3.12
 -24  -8  -1   15.57    3.35
  24  -8   1    9.79    3.82
 -24   8  -1   21.14    3.61
 -26  -8  -1    3.37    3.00
  26  -8   1   -0.11    3.34
 -26   8  -1    1.12    2.99
  28  -8   1    3.11    3.64
 -28  -8  -1    0.54    3.01
 -28   8  -1    2.40    3.16
  30  -8   1   -0.93    3.44
 -30  -8  -1    1.11    3.18
 -30   8  -1    1.56    3.08
 -32  -8  -1   12.82    3.91
  32  -8   1   13.90    4.33
 -32   8  -1   11.04    3.78
  33  -9  -1   -1.59    3.80
 -31  -9   1    3.11    3.35
  31  -9  -1   -3.14    3.17
  29  -9  -1    3.78    3.45
 -29  -9   1   -0.89    3.00
 -29   9   1    7.03    3.26
  27  -9  -1   15.08    4.30
 -27  -9   1   22.86    3.98
 -27   9   1   17.10    3.46
  25  -9  -1    5.48    3.39
 -25  -9   1    0.38    2.82
 -25   9   1   -4.42    2.38
  23  -9  -1   37.46    5.09
 -23  -9   1   26.46    3.84
 -23   9   1   26.95    3.61
  23   9  -1   21.71    3.55
 -21  -9   1   32.93    4.04
  21  -9  -1   39.44    4.70
  21   9  -1   37.14    4.08
 -21   9   1   28.75    3.91
 -19  -9   1    4.58    2.65
  19  -9  -1    2.64    3.21
 -19   9   1    3.50    2.30
  19   9  -1    6.80    2.56
  17  -9  -1   60.11    5.46
 -17  -9   1   57.43    4.59
 -17   9   1   57.99    4.12
  15  -9  -1    8.00    3.15
  15   9  -1    7.88    3.43
 -15   9   1    5.94    2.43
  13  -9  -1   23.47    3.88
 -13   9   1   26.08    3.18
  13   9  -1   21.08    3.97
  11  -9  -1   -2.31    2.78
 -11   9   1    3.81    2.01
  11   9  -1    1.03    2.68
   9  -9  -1   -4.17    2.38
  -9  -9   1    0.78    2.09
  -9   9   1   -2.53    1.76
   9   9  -1    2.35    2.86
  -7  -9   1    6.40    2.36
   7  -9  -1    6.18    2.76
  -7   9   1    3.98    1.92
   7   9  -1    6.88    2.94
  -5  -9   1   20.18    3.13
   5  -9  -1   20.75    3.47
   5   9  -1   24.30    3.66
   3  -9  -1   -1.56    2.51
  -3  -9   1    2.17    2.40
   3   9  -1    1.28    2.81
  -1  -9   1   57.63    4.34
   1  -9  -1   59.03    4.42
   1   9  -1   41.50    4.49
   1  -9   1   -3.20    2.45
  -1  -9  -1    0.57    2.30
  -1   9  -1    1.33    2.61
   3  -9   1   42.07    4.53
  -3  -9  -1   41.42    4.04
  -3   9  -1   46.30    4.31
   5  -9   1   47.60    4.64
  -5  -9  -1   41.00    3.53
  -5   9  -1   36.24    3.88
  -5   9  -1   35.28    3.46
   7  -9   1   45.30    4.36
  -7  -9  -1   48.19    3.56
  -7   9  -1   44.98    3.70
  -7   9  -1   42.97    3.87
   9  -9   1   53.53    4.68
  -9   9  -1   59.92    4.28
  -9   9  -1   54.17    3.77
  11  -9   1   -0.90    2.86
 -11  -9  -1    0.66    1.92
 -11   9  -1    1.57    2.22
  13  -9   1   -4.17    2.49
 -13  -9  -1   -2.53    2.02
 -13   9  -1    1.09    2.15
 -15  -9  -1   -1.50    1.95
  15  -9   1    2.32    3.12
 -15   9  -1   -1.67    2.20
 -17  -9  -1    1.81    2.35
  17  -9   1    0.16    2.89
 -17   9  -1    0.21    2.36
  19  -9   1    0.67    3.38
 -19  -9  -1    2.76    2.46
 -19   9  -1    2.18    2.53
  21  -9   1    4.14    3.52
 -21  -9  -1    3.89    2.69
 -21   9  -1    9.95    3.10
 -23  -9  -1    0.68    2.88
  23  -9   1   -3.73    2.92
 -23   9  -1    0.86    2.64
 -25  -9  -1   19.26    3.73
  25  -9   1   19.19    4.53
 -25   9  -1   17.18    3.56
  27  -9   1    9.46    3.85
 -27  -9  -1   10.71    3.54
 -27   9  -1   10.51    3.38
 -29  -9  -1    2.91    3.24
  29  -9   1    6.45    3.75
 -29   9  -1    3.10    3.25
  31  -9   1    0.56    3.86
 -31  -9  -1    8.97    3.72
 -31   9  -1    9.12    3.61
  30 -10  -1   -5.84    3.66
 -30 -10   1    0.78    3.23
 -28 -10   1    4.42    3.26
  28 -10  -1    4.77    4.01
 -26 -10   1    5.13    3.33
  26 -10  -1    4.86    3.79
  24 -10  -1   -1.81    3.06
 -24 -10   1   -0.25    2.89
  22 -10  -1    5.63    3.52
 -22 -10   1    7.09    3.03
 -20 -10   1   -2.82    2.64
  20 -10  -1    4.56    3.63
 -18 -10   1   22.34    3.53
  18 -10  -1   12.14    3.69
  16 -10  -1    2.52    3.34
 -16 -10   1   -1.29    2.47
  14 -10  -1   22.92    4.17
  12 -10  -1    3.33    3.09
  12  10  -1    5.34    3.19
  10 -10  -1    4.79    3.28
  10  10  -1   10.18    3.48
   8 -10  -1   15.61    3.63
   8  10  -1   22.87    4.01
   6 -10  -1   16.09    3.59
  -6 -10   1   14.59    3.04
   6  10  -1   18.24    3.70
   4 -10  -1   17.82    3.38
  -4 -10   1    8.67    2.83
   4  10  -1   12.10    3.21
   2 -10  -1   -1.17    2.56
  -2 -10   1    2.23    2.60
   2  10  -1    1.62    2.92
   0 -10  -1    3.12    2.76
   0 -10   1    5.67    2.87
   0  10  -1    6.18    2.90
   2 -10   1    1.25    2.72
  -2 -10  -1    2.63    2.56
  -2  10  -1    2.43    2.78
  -4 -10  -1    3.38    2.47
   4 -10   1    0.98    2.74
  -4  10  -1    4.96    2.75
   6 -10   1    2.74    2.86
  -6  10  -1    2.62    2.29
  -6  10  -1   -1.91    2.44
   8 -10   1    2.14    3.18
  -8  10  -1    7.71    2.49
  10 -10   1    0.81    2.91
 -10  10  -1    4.07    2.51
  12 -10   1    3.52    3.42
 -12  10  -1    3.02    2.37
  14 -10   1    5.78    3.32
 -14  10  -1    3.42    2.42
  16 -10   1    8.13    3.78
 -16  10  -1   15.35    3.13
  18 -10   1    9.68    3.71
 -18  10  -1   13.65    3.09
  20 -10   1    1.73    3.63
 -20  10  -1    0.88    2.53
  22 -10   1    6.98    4.00
 -22  10  -1    6.86    3.00
  24 -10   1    7.30    3.77
 -24  10  -1    6.26    3.09
  26 -10   1    9.67    4.22
 -26  10  -1    2.63    3.14
  28 -10   1   -5.65    3.27
  25 -11  -1   -1.64    3.50
  23 -11  -1    5.34    3.74
  21 -11  -1    3.19    3.90
  19 -11  -1    4.10    3.55
  17 -11  -1    0.40    3.59
  15 -11  -1    0.14    3.24
  13 -11  -1    1.77    3.47
  11 -11  -1   -0.80    3.25
   9 -11  -1   20.35    4.11
   7 -11  -1   19.12    3.88
   5 -11  -1    5.15    3.17
   3 -11  -1    5.76    3.12
  -3 -11   1    4.23    3.08
   1 -11  -1    0.60    3.00
  -1 -11   1   -1.86    2.82
  -1 -11  -1    6.54    3.08
   1 -11   1    1.64    2.97
   3 -11   1    1.09    3.01
   5 -11   1    4.15    3.25
   7 -11   1    6.64    3.27
   9 -11   1    0.20    3.37
  11 -11   1    2.80    3.31
  13 -11   1    7.25    3.97
  15 -11   1    0.75    3.73
  17 -11   1    6.41    4.09
  19 -11   1   -4.49    3.38
  21 -11   1    4.91    4.02
  23 -11   1   -1.96    3.79
  22 -12  -1   -6.12    3.48
  20 -12  -1   -2.28    3.48
  18 -12  -1    4.33    4.22
  16 -12  -1    0.41    3.83
  14 -12  -1   -1.80    3.74
  12 -12  -1    0.00    3.55
  10 -12  -1   -1.29    3.52
   8 -12  -1    0.05    3.45
   6 -12  -1   -0.09    2.99
   4 -12  -1   -2.27    3.09
   2 -12  -1    5.12    3.29
  -2 -12   1    7.46    3.36
   0 -12  -1    3.49    3.11
   0 -12   1   12.00    3.66
   2 -12   1   -0.17    3.23
   4 -12   1    9.26    3.76
   6 -12   1   -1.72    3.32
   8 -12   1    5.03    3.38
  10 -12   1    7.92    3.93
  12 -12   1    3.30    3.52
  14 -12   1    0.42    3.79
  16 -12   1   -0.57    3.81
  18 -12   1    1.34    3.69
  20 -12   1    1.12    4.09
  15 -13  -1   -0.86    4.06
  13 -13  -1    5.49    3.86
  11 -13  -1   -1.56    3.89
   9 -13  -1   10.12    4.16
   7 -13  -1   10.62    3.89
   5 -13  -1    1.47    3.51
   3 -13  -1   -2.57    3.56
   1 -13   1    2.21    3.89
   3 -13   1    4.32    3.75
   5 -13   1   25.27    4.73
   7 -13   1   -1.36    3.67
   9 -13   1   -2.85    3.72
  11 -13   1   -0.64    3.70
  13 -13   1   10.86    4.62
 -42   0   2   12.98    4.02
 -42   0   2   13.96    3.81
 -40   0   2   17.22    4.12
 -40   0   2   20.09    4.02
 -38   0   2   59.55    5.43
 -38   0   2   60.44    5.14
  38   0  -2   54.31    3.80
 -36   0   2   26.68    3.98
 -36   0   2   28.52    4.07
  36   0  -2   27.81    3.33
 -34   0   2    2.82    2.93
 -34   0   2   10.48    3.15
  34   0  -2    6.60    2.50
 -32   0   2    2.40    2.52
 -32   0   2    1.08    2.71
  32   0  -2    4.50    2.28
  30   0  -2   13.79    2.49
 -30   0   2   12.54    2.95
  28   0  -2   34.88    3.79
 -28   0   2   37.97    3.74
  28   0  -2   36.97    3.25
 -26   0   2   26.14    3.59
  26   0  -2   18.87    2.94
  26   0  -2   20.52    2.55
  24   0  -2  136.92    4.45
 -24   0   2  130.06    5.50
  24   0  -2  124.42    5.28
  22   0  -2   63.49    3.28
 -22   0   2   67.80    4.02
  22   0  -2   63.46    4.08
  20   0  -2   67.77    3.10
  20   0  -2   71.37    2.79
  20   0  -2   66.33    3.76
 -20   0   2   69.85    3.96
 -18   0   2  174.63    5.34
  18   0  -2  171.36    4.35
  18   0  -2  173.66    4.50
  16   0  -2   50.07    2.62
  16   0  -2   43.81    2.39
 -16   0   2   47.46    2.99
  16   0  -2   48.18    3.13
  14   0  -2  163.91    4.03
  14   0  -2  159.71    3.97
  14   0  -2  158.82    4.74
 -14   0   2  162.42    4.84
 -12   0   2  199.86    5.16
  10   0  -2   25.35    2.28
 -10   0   2   22.72    2.35
   8   0  -2  143.11    3.84
  -8   0   2  154.28    3.70
   6   0  -2   72.13    2.37
   4   0  -2  285.06    5.37
   4   0  -2  288.96    5.39
   2   0  -2  237.32    4.20
  -2   0   2  219.42    4.16
  -2   0   2  240.51    4.51
   2   0  -2  243.07    4.45
   0   0  -2   40.25    1.59
   0   0   2   40.08    1.46
   0   0  -2   39.15    1.40
  -2   0  -2  524.09    9.02
   2   0   2  524.38    9.24
  -2   0  -2  522.99    9.26
  -4   0  -2   78.86    2.73
   4   0   2   81.98    2.51
  -4   0  -2   77.46    2.79
  -6   0  -2   32.73    2.30
  -6   0  -2   32.72    2.50
   6   0   2   34.91    2.08
  -8   0  -2  157.51    4.48
  -8   0  -2  159.86    4.43
   8   0   2  157.26    3.93
  10   0   2   52.63    2.45
  10   0   2   49.79    2.24
 -10   0  -2   55.06    2.97
  12   0   2   33.79    2.44
  12   0   2   38.60    2.41
 -12   0  -2   35.31    2.86
 -12   0  -2   37.05    2.69
 -14   0  -2   73.32    3.66
  14   0   2   69.20    2.92
 -14   0  -2   71.97    3.79
  14   0   2   71.59    2.92
  16   0   2    8.79    1.60
  16   0   2    9.64    1.65
 -16   0  -2    5.78    2.03
 -16   0  -2    5.89    1.93
  18   0   2    2.79    1.53
  18   0   2    3.22    1.51
 -18   0  -2    1.94    1.97
 -18   0  -2    5.75    1.96
 -20   0  -2   33.40    3.35
 -20   0  -2   34.42    3.27
  20   0   2   36.27    2.80
 -22   0  -2   84.39    4.78
 -22   0  -2   74.94    4.47
  22   0   2   78.51    3.65
 -24   0  -2  129.79    5.83
  24   0   2  141.71    4.80
 -24   0  -2  132.03    5.78
 -26   0  -2    5.51    2.75
 -26   0  -2    5.39    2.78
 -28   0  -2   37.57    4.43
 -28   0  -2   42.63    4.55
 -30   0  -2   58.45    5.08
 -30   0  -2   49.23    4.56
 -32   0  -2   -4.21    2.60
 -32   0  -2   -3.20    2.55
 -34   0  -2  109.27    6.40
 -34   0  -2   98.19    6.22
 -36   0  -2   61.37    5.75
 -36   0  -2   52.53    5.59
 -38   0  -2    5.01    3.51
 -38   0  -2    6.46    3.83
 -40   0  -2   16.68    4.45
 -40   0  -2    5.92    3.67
 -43  -1   2    1.36    3.55
  43  -1  -2   -4.07    2.78
 -43  -1   2    4.04    3.70
 -43   1   2    3.51    3.62
 -43   1   2   -2.85    2.86
 -41  -1   2   -4.09    2.91
  41  -1  -2    3.77    2.97
 -41  -1   2    6.96    3.56
 -41   1   2   -3.34    2.90
 -41   1   2    2.09    3.34
  39  -1  -2    6.56    2.81
 -39  -1   2   16.24    3.78
 -39  -1   2    2.94    3.41
 -39   1   2    9.24    3.44
 -39   1   2    6.81    3.49
 -37  -1   2   15.50    3.52
  37  -1  -2   17.26    3.11
 -37  -1   2   14.05    3.74
 -37   1   2   16.96    3.65
 -37   1   2   12.71    3.67
 -35  -1   2    9.41    3.15
  35  -1  -2    9.33    2.77
 -35  -1   2   13.79    3.55
 -35   1   2   10.17    3.13
 -35   1   2   10.64    3.23
  35   1  -2    9.80    2.22
 -33  -1   2    2.47    2.90
  33  -1  -2    3.97    2.57
 -33  -1   2    5.80    2.85
  33   1  -2    1.86    1.98
 -33   1   2    1.56    2.56
 -33   1   2    2.43    2.80
 -31  -1   2   32.14    3.92
  31  -1  -2   40.02    3.75
 -31   1   2   33.28    4.24
  31   1  -2   35.37    4.05
 -31   1   2   30.46    4.19
  31   1  -2   32.77    2.91
  29  -1  -2   13.84    2.66
 -29  -1   2   11.33    2.86
 -29   1   2   13.70    2.92
  29   1  -2   13.66    3.16
  29   1  -2   14.27    2.23
  27  -1  -2   67.47    3.85
 -27  -1   2   73.47    4.48
  27  -1  -2   67.31    4.38
  27   1  -2   70.26    3.35
 -27   1   2   75.12    4.50
  27   1  -2   72.29    4.85
 -25  -1   2  198.80    6.85
  25  -1  -2  195.87    5.66
  25  -1  -2  201.27    6.90
  25   1  -2  197.05    5.02
  25   1  -2  193.60    6.81
 -25   1   2  189.56    6.74
  23  -1  -2   23.51    2.77
 -23  -1   2   24.41    3.00
  23  -1  -2   28.95    3.39
  23   1  -2   24.72    2.38
 -23   1   2   23.48    2.96
  23   1  -2   23.85    3.43
  21  -1  -2   32.95    2.83
 -21  -1   2   33.11    3.04
  21  -1  -2   33.62    3.32
 -21   1   2   34.01    3.26
  21   1  -2   37.24    3.30
  21   1  -2   34.71    2.63
  21   1  -2   33.25    2.40
 -19  -1   2   13.29    2.33
  19  -1  -2   11.46    2.13
  19  -1  -2   11.14    1.99
  19   1  -2   13.92    1.71
 -19   1   2   10.86    2.10
  19   1  -2    8.46    2.26
  19   1  -2   10.80    1.81
  17  -1  -2   -1.44    1.58
  17  -1  -2    2.60    1.84
 -17  -1   2   -2.45    1.52
  17  -1  -2    1.47    0.91
  17   1  -2    1.66    1.35
 -17   1   2   -1.10    1.59
  17   1  -2   -0.80    1.59
  17   1  -2   -0.43    1.46
 -15  -1   2   89.96    3.62
  15  -1  -2   82.81    2.28
  15  -1  -2   84.72    3.53
  15  -1  -2   85.49    3.29
  15   1  -2   79.69    3.59
  15   1  -2   84.68    3.36
 -15   1   2   80.43    3.46
  15   1  -2   77.81    2.78
 -13  -1   2    3.61    1.63
  13  -1  -2    1.30    1.56
  13   1  -2    0.52    1.54
 -13   1   2    1.01    1.45
  13   1  -2    3.67    1.20
  13   1  -2    2.45    1.52
  11  -1  -2   42.02    2.64
 -11  -1   2   42.54    2.82
  11   1  -2   46.84    2.70
 -11   1   2   44.61    2.67
  11   1  -2   44.60    1.89
   9  -1  -2  238.98    5.34
  -9   1   2  238.49    5.17
   9   1  -2  240.54    5.53
  -7  -1   2   -0.12    1.08
   7  -1  -2    2.57    1.24
  -7   1   2    0.15    1.12
   7   1  -2    0.68    1.30
  -5  -1   2  552.18    9.70
   5  -1  -2  547.17    9.50
  -5   1   2  541.60    9.18
   5   1  -2  547.29    9.82
   5   1  -2  559.09    9.71
  -3  -1   2  581.38   10.16
   3  -1  -2  583.52    9.76
   3  -1  -2  575.93    9.73
   3   1  -2  590.38   10.01
   3   1  -2  573.14   10.07
  -3   1   2  568.68    9.26
   1  -1  -2   98.41    1.78
   1  -1  -2   97.92    2.19
  -1  -1   2  101.05    2.63
  -1   1   2   99.34    1.78
   1   1  -2   99.85    2.60
   1   1  -2   97.97    2.43
  -1  -1  -2  414.71    7.41
   1  -1   2  424.10    7.93
  -1  -1  -2  424.75    7.13
   1   1   2  417.05    7.12
  -1   1  -2  426.60    7.58
  -1   1  -2  425.10    7.64
   3  -1   2   11.24    1.38
  -3  -1  -2   10.81    1.29
   3  -1   2   10.09    1.59
  -3  -1  -2    7.26    1.17
  -3   1  -2   12.23    1.53
  -3   1  -2    8.17    1.35
   3   1   2    8.89    1.32
   5  -1   2   52.68    2.57
  -5  -1  -2   52.56    2.51
   5  -1   2   49.58    2.44
  -5  -1  -2   52.67    2.57
   5   1   2   52.04    1.80
  -5   1  -2   46.56    2.62
  -5   1  -2   49.14    2.70
  -7  -1  -2  202.26    4.93
  -7  -1  -2  202.34    4.93
   7  -1   2  204.70    4.84
   7  -1   2  206.63    4.50
   7   1   2  200.04    4.04
  -7   1  -2  199.38    4.93
  -7   1  -2  198.18    4.97
   9  -1   2   24.27    2.40
  -9  -1  -2   15.40    1.85
   9  -1   2   22.14    2.03
  -9  -1  -2   21.27    2.21
  -9   1  -2   18.83    2.29
   9   1   2   17.98    1.58
  -9   1  -2   17.82    2.56
 -11  -1  -2   69.96    3.51
 -11  -1  -2   73.63    3.30
  11  -1   2   69.18    3.07
  11  -1   2   75.30    3.23
  11   1   2   74.62    2.42
 -11   1  -2   78.19    3.64
 -11   1  -2   83.70    3.64
  13  -1   2    5.94    1.74
 -13  -1  -2    8.80    2.03
 -13  -1  -2    1.75    1.64
  13  -1   2    7.54    1.83
  13   1   2    6.19    1.24
 -13   1  -2    8.05    1.92
 -13   1  -2    7.99    1.86
 -15  -1  -2  161.88    5.27
  15  -1   2  158.21    4.82
  15  -1   2  156.74    4.47
 -15  -1  -2  167.89    5.44
 -15   1  -2  174.04    5.43
 -15   1  -2  161.11    5.45
  15   1   2  157.48    4.01
 -17  -1  -2  121.28    4.78
 -17  -1  -2  109.39    4.73
  17  -1   2  115.08    4.11
  17  -1   2  121.70    4.25
 -17   1  -2  119.09    4.90
  17   1   2  115.69    3.42
 -17   1  -2  110.16    4.76
  19  -1   2   -0.25    1.72
 -19  -1  -2   -0.63    1.77
 -19  -1  -2   -2.11    1.95
  19  -1   2   -2.04    1.62
 -19   1  -2   -0.13    1.86
 -19   1  -2   -0.58    1.99
  19   1   2   -1.87    1.27
 -21  -1  -2  304.03    8.58
 -21  -1  -2  305.47    8.48
  21  -1   2  303.82    7.08
  21  -1   2  312.43    7.78
 -21   1  -2  303.18    8.50
  21   1   2  304.21    6.79
 -21   1  -2  306.38    8.59
  23  -1   2  147.19    5.24
 -23  -1  -2  139.04    5.82
  23  -1   2  143.39    4.80
 -23  -1  -2  139.48    6.10
 -23   1  -2  146.86    5.99
 -23   1  -2  142.80    6.08
  23   1   2  155.54    4.41
  25  -1   2   13.06    2.47
 -25  -1  -2   11.55    3.02
  25  -1   2    6.40    2.36
 -25  -1  -2    8.12    2.72
 -25   1  -2    9.14    2.89
 -25   1  -2   10.09    2.72
  27  -1   2   46.96    3.77
 -27  -1  -2   46.71    4.28
  27  -1   2   52.02    3.70
 -27  -1  -2   43.56    4.10
 -27   1  -2   50.15    4.34
 -27   1  -2   52.12    4.64
 -29  -1  -2    0.81    2.86
 -29  -1  -2    4.77    2.77
 -29   1  -2    2.00    2.53
 -29   1  -2    0.72    2.87
 -31  -1  -2    2.10    2.77
 -31  -1  -2    1.39    2.73
 -31   1  -2   -0.27    2.62
 -31   1  -2    5.55    3.00
 -33  -1  -2    3.00    2.95
 -33  -1  -2    3.23    3.26
 -33   1  -2    7.09    3.01
 -33   1  -2    4.59    3.26
 -35  -1  -2   17.75    4.03
 -35  -1  -2   17.78    3.98
 -35   1  -2   22.21    4.23
 -35   1  -2   30.93    4.31
 -37  -1  -2   21.54    4.29
 -37  -1  -2   15.14    3.96
 -37   1  -2   17.27    3.95
 -37   1  -2   13.29    3.95
 -39  -1  -2   -3.77    3.38
 -39  -1  -2    0.43    3.24
 -39   1  -2    0.10    3.00
 -39   1  -2    1.50    3.18
 -42  -2   2    8.28    4.06
 -42  -2   2    5.05    3.63
  42  -2  -2    5.77    3.18
 -42   2   2    1.71    3.21
 -42   2   2    6.93    3.59
 -40  -2   2    7.33    3.62
 -40  -2   2    4.38    3.55
  40  -2  -2   11.58    3.24
 -40   2   2   10.45    3.62
 -40   2   2    7.39    3.58
 -38  -2   2   22.18    3.99
  38  -2  -2   28.18    3.73
 -38  -2   2   29.52    4.42
 -38   2   2   21.85    3.89
 -38   2   2   34.69    4.79
 -36  -2   2   10.05    3.56
  36  -2  -2   17.49    3.13
 -36  -2   2    4.80    3.35
 -36   2   2    6.97    3.34
 -36   2   2   15.29    3.60
 -34  -2   2    7.05    3.35
 -34  -2   2   10.67    3.33
  34  -2  -2    4.57    2.77
 -34   2   2    9.40    3.21
 -34   2   2    5.35    3.03
  32  -2  -2   11.65    2.81
 -32  -2   2   13.05    3.19
  32   2  -2    2.19    3.00
 -32   2   2   12.21    3.05
 -32   2   2    9.53    2.93
 -30  -2   2   11.12    2.93
  30  -2  -2    9.79    2.77
  30   2  -2    8.00    2.82
 -30   2   2    8.98    2.77
 -30   2   2   11.76    2.94
  28  -2  -2   -1.58    2.32
 -28  -2   2    0.68    2.41
  28   2  -2    1.84    1.44
  28   2  -2   -0.79    2.21
 -28   2   2   -0.25    2.21
 -28   2   2   -0.32    2.16
  26  -2  -2   27.96    3.34
 -26  -2   2   25.03    3.33
 -26   2   2   24.39    3.17
  26   2  -2   21.19    2.13
  26   2  -2   26.72    3.47
 -24  -2   2   69.50    4.46
  24  -2  -2   70.39    3.91
  24   2  -2   67.41    3.74
  24   2  -2   70.05    2.67
  24   2  -2   64.20    4.15
 -24   2   2   63.76    3.85
  22  -2  -2   18.00    2.49
 -22  -2   2   17.34    2.56
  22  -2  -2   19.53    2.52
  22   2  -2   15.55    2.55
 -22   2   2   17.96    2.65
  22   2  -2   21.43    2.84
  22   2  -2   22.42    1.94
  20  -2  -2   38.26    3.12
 -20  -2   2   47.26    3.54
  20  -2  -2   44.95    3.33
  20   2  -2   43.02    3.04
 -20   2   2   49.23    3.44
  20   2  -2   41.22    3.30
  20   2  -2   46.17    2.09
 -18  -2   2  291.64    7.47
  18  -2  -2  301.66    6.80
  18  -2  -2  299.35    7.46
 -18   2   2  280.46    7.36
  18   2  -2  304.36    7.87
  18   2  -2  295.46    5.44
  18   2  -2  299.59    7.47
 -16  -2   2  106.99    4.15
  16  -2  -2  115.73    3.78
  16  -2  -2  105.50    4.08
  16   2  -2  103.00    4.10
 -16   2   2  114.43    4.22
  16   2  -2  114.17    2.80
  16   2  -2  109.71    4.23
 -14  -2   2   12.14    1.92
  14  -2  -2   12.88    1.90
  14   2  -2   10.24    1.17
 -14   2   2   12.24    1.91
  14   2  -2   17.54    2.27
  14   2  -2   16.82    2.14
  12  -2  -2  207.38    5.10
 -12  -2   2  205.65    5.30
  12   2  -2  197.23    5.54
  12   2  -2  205.73    3.76
 -12   2   2  206.41    5.12
  12   2  -2  199.91    5.50
 -10  -2   2    1.29    0.99
  10  -2  -2    5.77    1.35
  10   2  -2    0.13    1.54
  10   2  -2    4.30    0.83
 -10   2   2    4.30    1.37
  10   2  -2    2.81    1.61
  -8  -2   2   57.17    2.16
   8  -2  -2   52.81    2.26
  -8   2   2   62.12    2.47
   8   2  -2   60.23    2.61
   6  -2  -2   40.13    1.78
  -6  -2   2   35.83    2.10
   6   2  -2   38.01    2.42
   6   2  -2   41.31    1.50
  -6   2   2   39.34    1.85
   6   2  -2   41.28    2.28
  -4  -2   2   50.23    2.33
   4  -2  -2   47.40    1.50
  -4   2   2   48.67    1.57
   4   2  -2   45.38    1.82
   4   2  -2   47.12    2.36
   4   2  -2   49.89    2.14
  -2  -2   2  274.67    5.67
   2  -2  -2  266.27    4.52
   2  -2  -2  275.42    4.73
   2   2  -2  270.34    5.59
   2   2  -2  267.58    4.81
   2   2  -2  270.61    5.33
  -2   2   2  271.60    4.71
   2   2  -2  265.85    5.39
   0  -2   2    6.88    1.41
   0  -2   2    7.15    1.65
   0  -2  -2    8.20    1.11
   0  -2  -2    5.81    0.79
   0   2  -2    6.93    1.15
   0   2   2    6.64    0.81
   0   2  -2    6.11    1.32
   2  -2   2   29.93    2.36
   2  -2   2   31.87    2.68
  -2  -2  -2   28.29    1.62
  -2  -2  -2   33.08    1.61
  -2   2  -2   33.58    2.43
  -2   2  -2   34.17    2.05
  -4  -2  -2   69.58    2.40
  -4  -2  -2   69.47    2.38
   4  -2   2   69.65    3.31
   4  -2   2   67.69    2.62
  -4   2  -2   64.82    2.67
   6  -2   2    1.77    1.46
  -6  -2  -2   -0.92    0.67
   6  -2   2    2.97    1.54
  -6  -2  -2   -0.05    1.18
  -6  -2  -2   -1.16    1.22
  -6   2  -2   -0.45    1.47
  -6   2  -2    1.95    1.35
  -8  -2  -2   60.60    2.67
  -8  -2  -2   56.87    1.53
   8  -2   2   53.99    2.64
  -8  -2  -2   59.62    2.91
   8  -2   2   58.22    2.98
  -8   2  -2   60.25    3.14
  -8   2  -2   60.67    3.02
  10  -2   2  111.88    3.67
 -10  -2  -2  117.61    4.03
 -10  -2  -2  116.77    3.92
  10  -2   2  123.97    4.31
 -10   2  -2  128.48    4.32
 -10   2  -2  118.60    3.98
 -12  -2  -2   19.71    2.73
  12  -2   2   25.76    2.81
  12  -2   2   22.28    2.81
 -12  -2  -2   21.15    2.54
 -12   2  -2   25.06    2.90
 -12   2  -2   21.79    2.48
  12   2   2   24.56    1.19
  14  -2   2  147.64    4.57
  14  -2   2  147.76    4.97
 -14  -2  -2  147.00    4.93
 -14  -2  -2  149.93    4.89
 -14   2  -2  142.92    5.09
  14   2   2  152.97    3.12
 -14   2  -2  154.23    5.18
 -16  -2  -2   18.75    2.54
  16  -2   2   18.75    2.73
  16  -2   2   23.67    2.84
 -16  -2  -2   20.73    2.59
 -16   2  -2   16.38    2.40
  16   2   2   20.00    1.39
 -16   2  -2   17.93    2.60
 -18  -2  -2    1.82    2.01
  18  -2   2   -0.57    1.80
 -18  -2  -2   -0.14    1.95
  18  -2   2    2.57    1.95
  18   2   2    1.16    0.91
 -18   2  -2   -0.06    1.71
 -18   2  -2    1.74    1.97
  20  -2   2   10.88    2.27
 -20  -2  -2   10.86    2.50
  20  -2   2    6.09    2.20
 -20  -2  -2   11.86    2.58
  20   2   2    7.86    1.18
 -20   2  -2    8.10    2.27
 -20   2  -2    4.05    2.09
  22  -2   2   26.60    3.25
 -22  -2  -2   26.94    3.64
 -22  -2  -2   26.51    3.37
  22  -2   2   26.91    3.21
 -22   2  -2   27.82    3.68
 -22   2  -2   25.05    3.56
  24  -2   2   40.54    3.54
  24  -2   2   33.48    3.76
 -24  -2  -2   42.39    4.18
 -24  -2  -2   34.36    3.73
 -24   2  -2   34.95    3.63
 -24   2  -2   37.33    3.71
 -26  -2  -2    3.40    2.69
  26  -2   2    3.36    2.37
 -26  -2  -2    0.35    2.65
  26  -2   2    4.31    2.51
 -26   2  -2    2.85    2.42
 -26   2  -2    5.63    2.85
 -28  -2  -2   81.85    5.44
  28  -2   2   74.59    4.26
 -28  -2  -2   75.32    5.38
  28  -2   2   84.92    4.85
 -28   2  -2   72.87    5.25
 -28   2  -2   78.00    5.09
  30  -2   2   27.09    3.54
 -30  -2  -2   23.36    3.89
 -30  -2  -2   19.95    3.70
  30  -2   2   27.26    3.43
 -30   2  -2   23.04    3.63
 -30   2  -2   19.02    3.42
  32  -2   2   -1.68    2.52
 -32  -2  -2   -2.13    2.93
 -32  -2  -2    1.18    2.64
 -32   2  -2    3.62    3.10
 -32   2  -2   -0.51    2.85
 -34  -2  -2   34.30    4.72
 -34  -2  -2   26.25    4.15
 -34   2  -2   39.15    4.61
 -34   2  -2   34.73    4.48
 -36  -2  -2   25.99    4.53
 -36  -2  -2   25.71    4.50
 -36   2  -2   37.50    5.17
 -36   2  -2   21.74    4.06
 -38  -2  -2    5.08    3.77
 -38  -2  -2    1.69    3.17
 -38   2  -2    1.56    3.44
 -38   2  -2    2.96    3.17
 -40  -2  -2    6.01    3.94
 -40  -2  -2   11.43    4.13
 -40   2  -2    4.49    3.80
 -40   2  -2    9.81    3.79
 -41  -3   2    3.45    3.66
 -41  -3   2    5.09    3.55
  41  -3  -2    0.11    3.26
 -41   3   2   -0.63    3.21
 -41   3   2   -1.49    3.18
  39  -3  -2    8.77    3.22
 -39  -3   2   10.53    3.68
 -39  -3   2   12.59    3.62
 -39   3   2    3.74    3.31
 -39   3   2   14.16    3.60
 -37  -3   2   13.70    3.74
 -37  -3   2   13.32    3.60
  37  -3  -2   11.46    3.24
 -37   3   2   12.05    3.36
 -37   3   2    4.75    3.19
 -35  -3   2   -0.75    3.08
  35  -3  -2    8.37    3.03
  35  -3  -2    3.27    2.88
 -35  -3   2    6.18    3.17
 -35   3   2    1.38    3.03
 -35   3   2    2.70    2.94
 -33  -3   2    7.17    3.28
  33  -3  -2    5.53    2.87
  33   3  -2    6.24    2.99
 -33   3   2   10.54    3.15
 -33   3   2    3.70    3.00
  31  -3  -2   14.23    3.15
 -31  -3   2   10.42    3.25
  31   3  -2   10.73    3.11
 -31   3   2    8.25    2.97
 -31   3   2   17.03    3.23
 -29  -3   2    7.35    2.76
  29  -3  -2    5.76    2.76
 -29   3   2    5.62    2.55
  29   3  -2    6.39    2.68
 -29   3   2   12.46    3.01
  27  -3  -2    4.54    2.61
 -27  -3   2    7.70    2.66
 -27   3   2    5.25    2.59
  27   3  -2    7.99    2.64
 -27   3   2    9.19    2.54
  25  -3  -2   10.89    2.49
 -25  -3   2   11.67    2.84
  25   3  -2    7.99    2.73
 -25   3   2    6.49    2.51
  25   3  -2   12.42    2.50
 -25   3   2   15.67    2.80
  23  -3  -2   14.28    2.60
 -23  -3   2   16.11    2.80
  23   3  -2   14.42    2.50
  23   3  -2   17.78    2.73
 -23   3   2   14.81    2.43
 -23   3   2   14.15    2.57
  21  -3  -2    0.75    2.02
 -21  -3   2    2.36    1.86
 -21   3   2   -0.23    1.82
  21   3  -2    1.44    1.99
  21   3  -2   -2.78    1.75
 -19  -3   2   14.78    2.30
  19  -3  -2   17.33    2.21
 -19   3   2   14.96    2.26
  19   3  -2   15.22    2.45
  19   3  -2   14.16    2.50
  17  -3  -2   44.27    3.21
 -17  -3   2   49.79    3.22
  17   3  -2   49.60    3.46
  17   3  -2   48.35    3.47
 -17   3   2   48.74    3.14
 -15  -3   2   19.69    2.53
  15  -3  -2   21.83    2.39
  15  -3  -2   25.79    2.39
  15   3  -2   20.48    2.99
  15   3  -2   23.22    2.91
 -15   3   2   22.84    2.51
  13  -3  -2  193.84    4.97
 -13   3   2  197.33    5.09
  13   3  -2  187.25    5.55
  13   3  -2  187.31    5.83
  11  -3  -2  163.25    4.11
 -11  -3   2  157.60    3.64
  11   3  -2  159.12    5.22
  11   3  -2  164.47    4.68
 -11   3   2  159.07    4.33
   9  -3  -2    7.62    1.22
  -9  -3   2    9.01    1.25
   9   3  -2   10.77    2.02
   9   3  -2    8.94    1.71
  -9   3   2   11.62    1.46
  -7  -3   2   62.62    2.42
   7  -3  -2   55.83    1.92
  -7   3   2   58.15    2.32
   7   3  -2   55.15    3.23
   7   3  -2   61.95    2.73
  -5  -3   2  239.95    5.35
  -5   3   2  247.83    4.74
   5   3  -2  239.04    5.08
   5   3  -2  242.45    5.30
  -3  -3   2  160.83    4.29
  -3   3   2  159.70    3.28
   3   3  -2  160.59    3.94
   3   3  -2  163.55    3.79
   3   3  -2  158.11    3.06
  -1  -3   2   23.99    2.54
   1   3  -2   23.27    1.78
   1   3  -2   18.70    2.01
   1   3  -2   20.84    1.88
   1   3  -2   19.28    1.59
   1  -3   2   29.97    2.50
   1  -3   2   31.89    2.15
  -1  -3  -2   30.22    1.34
  -1   3  -2   29.24    2.05
  -1   3  -2   33.83    1.99
  -1   3  -2   28.34    2.40
   3  -3   2   24.12    2.90
   3  -3   2   23.10    2.28
  -3  -3  -2   26.29    1.81
  -3  -3  -2   25.55    1.57
  -3   3  -2   26.05    2.20
  -3   3  -2   25.87    1.92
   5  -3   2    8.31    1.91
  -5  -3  -2    8.12    1.28
  -5  -3  -2    8.47    1.20
   5  -3   2    6.50    1.62
  -5   3  -2    9.90    1.75
  -5   3  -2    8.04    1.44
  -7  -3  -2   39.40    2.40
  -7  -3  -2   40.41    2.49
   7  -3   2   41.11    2.88
   7  -3   2   39.81    2.56
  -7   3  -2   39.79    2.61
  -7   3  -2   37.74    2.48
   9  -3   2  106.08    3.93
   9  -3   2  106.74    4.22
  -9  -3  -2  105.73    3.67
  -9  -3  -2  100.64    3.62
  -9   3  -2  114.34    3.88
  -9   3  -2  114.26    3.96
  11  -3   2   20.64    3.07
 -11  -3  -2   18.39    2.17
  11  -3   2   18.93    2.17
 -11  -3  -2   25.70    2.64
 -11   3  -2   20.23    2.24
 -11   3  -2   20.43    2.45
 -13  -3  -2   54.23    3.34
  13  -3   2   57.67    3.16
  13  -3   2   55.45    3.66
 -13  -3  -2   56.46    3.32
 -13   3  -2   56.30    3.16
 -13   3  -2   56.46    3.50
  15  -3   2   27.87    3.06
 -15  -3  -2   27.87    2.78
  15  -3   2   31.06    3.30
 -15  -3  -2   26.60    2.64
 -15   3  -2   22.09    3.00
 -15   3  -2   28.21    2.98
 -17  -3  -2    2.07    1.92
  17  -3   2    2.24    2.03
 -17  -3  -2    2.22    1.98
  17  -3   2   -0.10    1.92
 -17   3  -2    1.60    1.98
 -17   3  -2    0.53    1.89
  19  -3   2    6.86    2.28
 -19  -3  -2    5.37    2.28
 -19  -3  -2    4.94    2.03
  19  -3   2    5.99    2.31
 -19   3  -2    8.42    2.26
 -19   3  -2    3.11    2.08
 -21  -3  -2    9.87    2.49
  21  -3   2    8.81    2.51
  21  -3   2   11.64    2.67
 -21  -3  -2   12.83    2.65
 -21   3  -2    9.67    2.34
 -21   3  -2    3.15    2.19
 -23  -3  -2    1.34    2.42
 -23  -3  -2    1.57    2.17
  23  -3   2    6.04    2.56
  23  -3   2   -0.68    2.31
 -23   3  -2   -1.72    2.14
 -23   3  -2   -0.22    2.20
 -25  -3  -2    2.88    2.38
  25  -3   2   -0.35    2.49
  25  -3   2   -1.06    2.36
 -25  -3  -2    1.07    2.62
 -25   3  -2   -0.89    2.45
 -25   3  -2   -4.95    2.15
  27  -3   2   16.86    3.04
 -27  -3  -2   16.33    3.12
  27  -3   2   13.75    3.02
 -27  -3  -2   17.66    3.41
 -27   3  -2   11.15    3.13
 -27   3  -2   13.41    3.05
  29  -3   2   29.08    3.68
 -29  -3  -2   24.01    3.76
 -29  -3  -2   24.73    3.67
  29  -3   2   25.61    3.79
 -29   3  -2   23.27    3.84
 -29   3  -2   20.56    3.64
 -31  -3  -2    5.32    2.83
  31  -3   2    2.30    2.67
 -31  -3  -2    2.20    3.03
  31  -3   2    2.00    2.81
 -31   3  -2   -4.07    2.28
 -31   3  -2   -1.38    2.57
 -33  -3  -2    7.70    3.49
  33  -3   2   -0.68    2.88
 -33  -3  -2   11.65    3.61
 -33   3  -2    7.06    3.28
 -33   3  -2    5.94    3.21
 -35  -3  -2    5.22    3.57
  35  -3   2    2.67    3.05
 -35  -3  -2    2.87    3.22
 -35   3  -2    2.99    2.91
 -35   3  -2    9.35    3.46
 -37  -3  -2   11.51    3.81
 -37  -3  -2   16.21    3.93
 -37   3  -2   10.37    3.77
 -37   3  -2    6.04    3.74
 -39  -3  -2    3.58    3.79
 -39  -3  -2    2.01    3.43
 -39   3  -2    1.52    3.48
 -39   3  -2    0.55    3.38
  42  -4  -2   -4.44    3.42
 -42  -4   2    2.83    3.51
 -42  -4   2    3.53    3.63
 -42   4   2    4.78    3.54
  40  -4  -2    0.94    3.18
 -40  -4   2   -1.02    3.18
 -40  -4   2   -0.12    3.01
 -40   4   2    3.43    3.40
 -40   4   2   -2.78    2.79
  38  -4  -2    2.07    3.10
  38  -4  -2   -0.13    2.88
 -38  -4   2    1.37    3.30
 -38  -4   2    4.02    3.72
 -38   4   2    0.97    2.97
 -38   4   2   -5.99    2.86
  36  -4  -2    5.50    3.17
  36  -4  -2    6.26    3.24
 -36  -4   2    7.06    3.52
 -36  -4   2    3.53    3.23
 -36   4   2    0.17    2.86
 -36   4   2   -1.88    2.89
 -34  -4   2    0.22    3.06
  34  -4  -2    9.87    3.13
 -34  -4   2   -0.63    2.67
 -34   4   2    0.08    2.70
  34   4  -2    1.34    2.77
 -34   4   2    0.87    2.53
 -32  -4   2   18.82    3.54
  32  -4  -2   17.40    3.45
 -32   4   2   18.71    3.39
 -32   4   2   16.53    3.34
  32   4  -2   21.89    3.85
 -30  -4   2   16.16    3.26
  30  -4  -2   16.87    3.32
 -30   4   2   13.95    3.17
 -30   4   2   14.81    3.19
  30   4  -2   12.41    3.35
  28  -4  -2    6.18    2.89
 -28  -4   2    2.75    2.73
  28   4  -2    0.36    2.64
 -28   4   2    2.11    2.51
 -28   4   2    2.37    2.38
 -26  -4   2   37.77    3.71
  26  -4  -2   30.20    3.86
 -26   4   2   42.44    3.61
  26   4  -2   37.14    3.75
 -26   4   2   33.79    3.81
 -24  -4   2   17.20    2.88
  24  -4  -2   14.90    2.73
  24   4  -2   17.63    3.06
  24   4  -2   13.51    2.83
 -24   4   2   17.76    2.82
 -24   4   2   17.12    2.72
  22  -4  -2   -2.39    2.13
 -22  -4   2   -1.59    2.03
  22   4  -2   -1.40    2.17
 -22   4   2    0.55    1.96
 -22   4   2   -0.32    1.88
  22   4  -2    0.37    1.98
  20  -4  -2    5.50    2.20
 -20  -4   2    7.16    2.30
  20   4  -2    3.94    2.18
  20   4  -2    6.58    2.24
 -20   4   2    4.44    1.92
 -20   4   2    6.62    1.97
 -18  -4   2    3.72    2.08
  18  -4  -2    2.92    1.99
 -18   4   2    3.42    1.68
  18   4  -2    3.65    1.84
 -18   4   2    3.55    1.82
  18   4  -2    4.90    2.30
 -16  -4   2    0.21    1.63
  16  -4  -2    0.04    1.76
  16   4  -2   -0.53    1.98
 -16   4   2    1.42    1.56
 -16   4   2    0.01    1.46
  16   4  -2    0.54    1.61
 -14  -4   2    1.20    0.96
  14   4  -2    1.35    1.68
  14   4  -2    4.34    2.11
 -14   4   2    2.72    1.52
 -14   4   2    2.66    1.51
 -12  -4   2   30.42    1.87
 -12   4   2   28.32    2.22
 -12   4   2   36.95    2.54
  12   4  -2   38.68    2.88
  12   4  -2   29.09    3.07
 -10  -4   2   68.00    2.64
  10   4  -2   73.90    3.31
  10   4  -2   71.28    3.81
 -10   4   2   71.21    2.77
 -10   4   2   68.24    2.91
  -8  -4   2    3.22    1.40
   8   4  -2    1.94    2.09
   8   4  -2    2.32    1.43
  -8   4   2    4.17    1.26
  -8   4   2    4.37    1.05
  -6  -4   2   26.08    2.20
  -6   4   2   28.41    1.84
   6   4  -2   33.48    3.05
   6   4  -2   33.17    2.22
   6   4  -2   33.23    2.11
  -6   4   2   34.72    1.55
  -4  -4   2    5.60    1.64
   4   4  -2    6.62    1.95
  -4   4   2    6.94    1.15
   4   4  -2    6.94    1.39
   4   4  -2    7.18    1.22
  -2  -4   2    4.66    1.64
   2   4  -2    4.92    1.14
   2   4  -2    5.49    1.32
   2   4  -2    4.68    1.60
   2   4  -2    2.54    1.84
   0  -4   2    0.23    1.61
   0   4  -2   -1.45    1.36
   0   4  -2    0.31    1.03
   0   4  -2    1.38    1.14
   2  -4   2    9.40    1.91
  -2  -4  -2   13.39    1.20
   2  -4   2   15.00    1.74
  -2   4  -2   12.47    1.69
  -2   4  -2    7.80    1.70
   4  -4   2    8.10    1.61
  -4  -4  -2    7.86    1.05
   4  -4   2    8.71    2.11
  -4   4  -2    7.64    1.63
  -4   4  -2    7.76    1.36
  -6  -4  -2   32.56    2.25
   6  -4   2   37.86    2.94
   6  -4   2   35.08    3.06
  -6  -4  -2   31.26    2.04
  -6   4  -2   38.69    2.90
  -6   4  -2   35.57    2.24
   8  -4   2    8.81    2.02
  -8  -4  -2   10.05    1.47
   8  -4   2    8.72    2.12
  -8  -4  -2   11.00    1.61
  -8   4  -2    9.40    1.90
  -8   4  -2    9.27    1.61
  10  -4   2   42.01    3.68
  10  -4   2   42.16    3.29
 -10  -4  -2   44.83    2.75
 -10  -4  -2   44.61    2.66
 -10   4  -2   43.00    2.78
 -10   4  -2   46.29    3.19
 -12  -4  -2   18.27    2.46
 -12  -4  -2   20.64    2.53
  12  -4   2   15.90    2.49
  12  -4   2   24.19    3.05
 -12   4  -2   23.94    2.55
 -12   4  -2   17.84    2.49
  14  -4   2   31.38    2.88
  14  -4   2   24.69    3.02
 -14  -4  -2   30.52    2.67
 -14  -4  -2   24.75    2.82
 -14   4  -2   29.85    3.08
 -14   4  -2   27.92    2.57
  16  -4   2   25.78    3.31
  16  -4   2   26.28    3.49
 -16  -4  -2   28.63    3.07
 -16  -4  -2   25.97    3.07
 -16   4  -2   20.56    1.68
 -16   4  -2   32.04    2.97
 -16   4  -2   26.65    2.92
  18  -4   2    6.17    2.38
 -18  -4  -2    6.70    2.25
 -18  -4  -2    2.02    2.02
  18  -4   2    4.58    2.42
 -18   4  -2    6.39    2.12
 -18   4  -2    4.41    2.21
  20  -4   2    8.43    2.70
 -20  -4  -2    7.30    2.34
  20  -4   2   10.62    2.79
 -20  -4  -2    8.94    2.44
 -20   4  -2    9.22    2.49
 -20   4  -2   13.26    2.54
 -22  -4  -2   33.90    3.87
  22  -4   2   32.41    3.82
  22  -4   2   34.93    4.03
 -22  -4  -2   32.63    3.82
 -22   4  -2   27.42    3.74
 -22   4  -2   25.77    3.24
 -24  -4  -2    4.31    2.61
 -24  -4  -2    4.40    2.76
  24  -4   2    5.33    2.55
  24  -4   2    7.86    2.84
 -24   4  -2    4.39    2.52
 -24   4  -2    6.87    2.67
  26  -4   2    8.35    2.97
 -26  -4  -2    6.50    2.93
  26  -4   2    4.80    2.88
 -26  -4  -2    6.87    2.66
 -26   4  -2    3.92    2.51
 -26   4  -2    5.49    2.95
 -28  -4  -2    1.61    2.71
  28  -4   2    6.38    2.94
  28  -4   2    8.09    3.01
 -28  -4  -2    6.61    2.75
 -28   4  -2    7.16    3.02
 -28   4  -2   10.46    3.25
  30  -4   2   -0.67    2.71
 -30  -4  -2    4.57    3.08
 -30  -4  -2   -2.62    2.77
  30  -4   2   -2.18    2.78
 -30   4  -2    0.00    2.93
 -30   4  -2   -4.15    2.62
 -32  -4  -2    1.89    3.14
 -32  -4  -2    0.46    2.99
  32  -4   2   -5.71    2.75
  32  -4   2    0.72    2.84
 -32   4  -2    2.76    3.00
 -32   4  -2   -1.50    3.07
 -34  -4  -2   -2.16    3.12
  34  -4   2   -2.47    2.92
 -34  -4  -2   -0.73    2.99
 -34   4  -2   -1.86    3.18
 -34   4  -2    0.40    3.01
 -36  -4  -2    5.52    3.41
 -36  -4  -2    1.07    3.39
  36  -4   2    5.05    3.43
 -36   4  -2    2.97    3.38
 -36   4  -2    2.56    3.58
 -38  -4  -2    1.63    3.31
 -38  -4  -2    3.24    3.65
 -38   4  -2   -4.14    2.64
 -38   4  -2    4.97    3.70
 -41  -5   2   -0.64    3.40
 -41   5   2    6.01    3.39
 -39  -5   2   13.53    3.93
 -39  -5   2    3.12    3.71
  39  -5  -2   10.37    3.67
  39  -5  -2    8.98    3.46
 -39   5   2    7.15    3.44
 -39   5   2    6.24    3.72
  37  -5  -2    1.70    3.24
 -37  -5   2    1.50    3.41
 -37  -5   2    1.86    3.24
  37  -5  -2    0.89    3.06
 -37   5   2   -4.23    3.02
 -37   5   2    0.55    2.79
  35  -5  -2    8.09    3.31
 -35  -5   2    7.51    3.34
 -35  -5   2   14.58    3.71
  35  -5  -2   10.27    3.30
 -35   5   2   10.63    3.37
 -35   5   2   13.73    3.60
  33  -5  -2   -0.14    2.81
 -33  -5   2   -0.40    2.76
 -33   5   2   -2.76    2.60
 -33   5   2   -0.27    2.53
  33   5  -2    2.46    2.94
 -31  -5   2    3.31    2.77
  31  -5  -2    1.82    2.97
 -31   5   2    0.35    2.56
 -31   5   2    1.20    2.68
  31   5  -2    2.73    2.91
 -29  -5   2   13.09    3.30
  29  -5  -2    5.94    3.12
 -29   5   2   12.11    3.04
  29   5  -2   10.58    3.27
 -29   5   2   14.83    3.05
  27  -5  -2    1.24    2.73
 -27  -5   2   -0.37    2.38
 -27   5   2    2.22    2.39
  27   5  -2   -0.41    2.64
 -27   5   2   -3.85    2.02
 -25  -5   2    6.55    2.54
  25  -5  -2    4.14    2.83
 -25   5   2    5.25    2.46
  25   5  -2    7.25    2.73
 -25   5   2    3.80    2.31
  25   5  -2    4.02    2.75
  23  -5  -2    3.88    2.56
 -23  -5   2   -0.81    2.21
  23   5  -2   -1.11    2.41
  23   5  -2    5.01    2.48
 -23   5   2   -0.21    1.92
 -23   5   2   -3.36    1.97
  21  -5  -2    8.07    2.40
 -21  -5   2    3.13    2.29
 -21   5   2   12.05    2.40
  21   5  -2    7.93    2.63
 -21   5   2    4.92    2.11
  21   5  -2    4.64    2.26
  19  -5  -2    8.66    2.37
 -19  -5   2   10.87    2.32
  19   5  -2    7.72    2.31
 -19   5   2    6.47    1.91
 -19   5   2    6.32    2.13
  19   5  -2   14.51    2.93
 -17  -5   2   32.76    3.39
  17  -5  -2   43.69    3.12
 -17   5   2   36.89    2.93
 -17   5   2   41.03    2.86
  17   5  -2   33.09    3.50
  17   5  -2   35.93    3.26
  15  -5  -2    1.04    1.68
 -15  -5   2    0.81    1.00
  15   5  -2    2.22    2.09
 -15   5   2   -1.54    1.34
  15   5  -2    0.82    1.72
 -15   5   2   -0.65    1.45
 -13  -5   2   27.23    2.03
 -13   5   2   26.41    2.50
  13   5  -2   33.61    2.83
  13   5  -2   30.29    3.26
 -13   5   2   25.39    2.22
 -11  -5   2    1.17    1.28
  11   5  -2    0.19    1.47
 -11   5   2    1.61    1.16
 -11   5   2   -0.17    1.26
  11   5  -2   -0.24    1.90
  -9  -5   2    2.44    1.49
  -9   5   2    2.37    1.32
  -9   5   2   -0.17    0.94
   9   5  -2    2.13    1.94
   9   5  -2    0.74    1.42
  -7  -5   2   19.23    2.41
  -7   5   2   20.09    1.34
   7   5  -2   17.37    2.55
   7   5  -2   15.14    2.12
  -7   5   2   17.58    2.01
  -5  -5   2    5.46    1.71
   5   5  -2    4.18    2.16
  -5   5   2    3.04    1.25
   5   5  -2    4.64    1.40
   5   5  -2    4.85    1.22
  -3  -5   2    4.81    1.78
   3   5  -2    5.56    1.20
   3   5  -2    7.22    2.11
   3   5  -2    6.10    1.33
  -1  -5   2   70.23    3.41
   1   5  -2   62.57    3.90
   1   5  -2   72.58    3.31
   1   5  -2   69.06    2.44
   1   5  -2   70.61    2.68
   1  -5   2   64.29    3.49
  -1   5  -2   62.05    2.50
  -1   5  -2   67.16    3.77
  -1   5  -2   62.37    2.40
  -1   5  -2   59.89    3.13
   3  -5   2   80.16    3.25
  -3  -5  -2   71.63    2.09
   3  -5   2   69.25    3.75
  -3   5  -2   77.47    2.73
  -3   5  -2   72.99    3.38
  -3   5  -2   73.29    3.69
   5  -5   2   57.22    3.14
   5  -5   2   63.55    3.94
  -5  -5  -2   53.03    2.11
  -5   5  -2   58.81    3.27
  -5   5  -2   57.32    2.98
  -5   5  -2   54.02    2.53
  -7  -5  -2   10.45    1.58
   7  -5   2   10.73    2.40
   7  -5   2    9.98    2.00
  -7  -5  -2   10.39    1.31
  -7   5  -2   10.78    2.06
  -7   5  -2   11.17    1.63
  -7   5  -2    9.61    1.95
   9  -5   2    2.28    1.95
  -9  -5  -2    3.85    0.99
  -9  -5  -2    2.34    1.37
  -9  -5  -2    5.71    1.28
   9  -5   2    8.27    2.32
  -9   5  -2    4.84    1.63
  -9   5  -2    1.15    1.74
  -9   5  -2    3.90    1.49
 -11  -5  -2   25.08    2.39
  11  -5   2   23.15    3.14
 -11  -5  -2   22.56    1.30
  11  -5   2   27.30    3.13
 -11  -5  -2   20.13    2.37
 -11   5  -2   24.08    2.86
 -11   5  -2   26.07    2.48
 -11   5  -2   24.61    2.57
  13  -5   2   23.60    3.14
  13  -5   2   23.25    2.78
 -13  -5  -2   21.31    2.42
 -13  -5  -2   22.98    2.64
 -13   5  -2   23.14    2.23
 -13   5  -2   20.10    2.58
 -13   5  -2   16.68    2.44
 -15  -5  -2    3.03    1.69
  15  -5   2    4.95    2.44
  15  -5   2    8.29    2.28
 -15  -5  -2    5.45    2.02
 -15   5  -2    1.81    1.76
 -15   5  -2    2.69    1.91
 -15   5  -2    3.06    1.27
  17  -5   2   21.50    3.00
 -17  -5  -2   16.49    2.47
  17  -5   2   22.43    3.26
 -17  -5  -2   18.45    2.67
 -17   5  -2   23.76    3.30
 -17   5  -2   18.18    2.52
 -19  -5  -2   -2.64    1.90
 -19  -5  -2    0.77    2.16
  19  -5   2   -0.63    2.27
  19  -5   2   -2.80    2.43
 -19   5  -2    1.00    1.98
 -19   5  -2   -1.28    1.97
 -21  -5  -2    3.46    2.19
  21  -5   2    0.99    2.73
 -21  -5  -2    1.70    2.37
  21  -5   2    0.89    2.66
 -21   5  -2    1.78    2.01
 -21   5  -2    3.34    2.56
 -23  -5  -2    0.49    2.47
  23  -5   2    4.18    2.94
 -23  -5  -2   -0.24    2.27
  23  -5   2    2.40    2.75
 -23   5  -2    4.15    2.73
 -23   5  -2   -0.24    2.21
  25  -5   2   22.96    3.82
 -25  -5  -2   27.12    3.73
 -25  -5  -2   23.87    3.45
  25  -5   2   25.33    3.43
 -25   5  -2   24.34    3.59
 -25   5  -2   23.94    3.49
 -27  -5  -2   16.00    3.24
 -27  -5  -2   14.31    3.50
  27  -5   2   16.71    3.51
  27  -5   2   15.96    3.43
 -27   5  -2   15.15    3.27
 -27   5  -2   12.47    3.16
  29  -5   2   13.29    3.56
 -29  -5  -2   14.06    3.45
 -29  -5  -2   15.69    3.66
  29  -5   2   14.52    3.45
 -29   5  -2   18.84    3.43
 -29   5  -2   16.94    3.77
  31  -5   2    9.45    3.34
 -31  -5  -2   10.40    3.45
  31  -5   2   11.17    3.49
 -31  -5  -2   11.67    3.73
 -31   5  -2    9.49    3.32
 -31   5  -2    8.52    3.48
 -33  -5  -2    3.10    3.39
 -33  -5  -2    0.55    3.02
  33  -5   2   -3.43    2.85
  33  -5   2    2.23    3.13
 -33   5  -2    2.55    3.30
 -33   5  -2    6.83    3.25
  35  -5   2   12.00    3.90
 -35  -5  -2    4.19    3.14
 -35  -5  -2    2.99    3.32
  35  -5   2    4.09    3.55
 -35   5  -2    3.30    3.27
 -35   5  -2    4.36    3.39
  37  -5   2   -0.55    3.24
 -37  -5  -2   -5.34    3.27
 -37  -5  -2   -3.80    3.15
 -37   5  -2   -0.57    3.17
 -37   5  -2    1.81    3.60
  38  -6  -2   10.73    3.86
 -38  -6   2    8.52    3.92
  38  -6  -2    8.57    3.74
 -38  -6   2    9.69    3.72
 -38   6   2   10.65    3.41
 -38   6   2    2.94    3.39
 -36  -6   2   -1.23    3.31
  36  -6  -2    3.18    3.47
  36  -6  -2   -1.97    3.05
 -36  -6   2    3.85    3.00
 -36   6   2   -0.56    2.72
 -36   6   2    4.56    3.16
  34  -6  -2    3.90    3.22
  34  -6  -2    6.14    3.49
 -34  -6   2    5.67    3.45
 -34  -6   2    0.48    2.88
 -34   6   2    1.56    2.74
 -34   6   2    5.25    3.20
  32  -6  -2    2.09    2.83
  32  -6  -2    1.07    3.21
 -32  -6   2    1.37    3.07
 -32   6   2   -4.03    2.51
  32   6  -2    1.16    2.95
 -32   6   2   -0.52    2.53
  30  -6  -2   -0.38    3.08
 -30  -6   2   -3.33    2.76
  30   6  -2   -1.51    2.82
 -30   6   2   -2.43    2.51
 -30   6   2   -0.99    2.40
  28  -6  -2    2.50    2.83
 -28  -6   2    0.34    2.76
 -28   6   2    3.15    2.60
 -28   6   2    3.58    2.34
  28   6  -2   -5.71    2.39
  26  -6  -2    1.92    2.92
 -26  -6   2    4.04    2.76
 -26   6   2    7.54    2.61
  26   6  -2    3.28    2.76
 -26   6   2    7.31    2.50
 -24  -6   2    1.82    2.36
  24   6  -2   -2.89    2.68
 -24   6   2   -0.81    2.23
  24   6  -2   -2.41    2.34
 -24   6   2   -2.08    1.96
 -22  -6   2    4.66    2.52
 -22   6   2    4.37    2.04
  22   6  -2    5.46    2.88
  22   6  -2    2.61    2.40
 -22   6   2    2.19    2.13
 -20  -6   2   -0.02    2.21
 -20   6   2    2.10    2.02
  20   6  -2   -5.16    2.37
 -20   6   2   -2.19    1.70
  20   6  -2   -0.41    2.06
 -18  -6   2   28.90    3.46
  18   6  -2   19.69    2.74
 -18   6   2   22.90    2.67
 -18   6   2   22.98    3.02
  18   6  -2   23.01    3.56
  16   6  -2   12.98    2.32
  16   6  -2   14.29    3.11
 -16   6   2   15.44    2.00
 -16   6   2   12.01    2.05
 -14  -6   2   29.72    2.16
 -14   6   2   31.89    2.74
  14   6  -2   32.56    3.65
  14   6  -2   18.93    2.69
 -14   6   2   26.59    2.33
 -12  -6   2   45.67    2.60
  12   6  -2   49.79    3.22
 -12   6   2   52.21    2.41
 -12   6   2   48.60    2.88
  12   6  -2   43.65    3.80
 -10  -6   2    8.45    1.70
 -10   6   2    9.37    1.65
  10   6  -2   11.31    1.88
  10   6  -2    6.87    2.33
 -10   6   2    9.19    1.22
  -8  -6   2    1.99    1.57
  -8   6   2    2.03    0.81
  -8   6   2    2.65    1.40
   8   6  -2   -1.28    1.89
   8   6  -2    0.06    1.39
  -6  -6   2   19.31    2.54
  -6   6   2   14.30    1.66
   6   6  -2   18.89    2.83
   6   6  -2   15.23    1.94
  -4  -6   2   25.13    2.86
   4   6  -2   24.69    2.14
   4   6  -2   27.07    1.87
   4   6  -2   37.90    3.33
  -4   6   2   25.42    2.11
  -2  -6   2   22.62    2.90
   2   6  -2   27.57    3.37
   2   6  -2   25.76    1.84
   2   6  -2   23.09    2.04
   0  -6   2   10.60    2.15
   0   6  -2   14.38    1.64
   0   6  -2   13.73    2.32
   0   6  -2   12.87    1.96
   0   6  -2   14.59    1.84
   2  -6   2    2.64    1.92
  -2   6  -2    5.91    1.21
  -2   6  -2    4.25    1.68
  -2   6  -2    5.33    2.06
  -2   6  -2    4.62    1.21
   4  -6   2   57.68    3.80
  -4  -6  -2   60.63    1.97
   4  -6   2   61.52    3.20
  -4   6  -2   60.69    3.79
  -4   6  -2   62.69    3.30
  -4   6  -2   62.97    2.59
   6  -6   2   -2.26    1.63
  -6  -6  -2    0.27    0.95
   6  -6   2    0.86    2.01
  -6   6  -2   -0.31    1.68
  -6   6  -2   -0.70    1.18
  -6   6  -2   -0.44    1.61
  -8  -6  -2   21.79    2.27
  -8  -6  -2   23.28    1.89
   8  -6   2   24.82    3.00
   8  -6   2   20.52    2.99
  -8  -6  -2   20.14    2.03
  -8   6  -2   24.39    2.36
  -8   6  -2   24.76    2.88
  -8   6  -2   28.16    2.81
  10  -6   2   13.62    2.62
 -10  -6  -2   15.65    2.08
 -10  -6  -2   18.85    1.75
 -10  -6  -2   17.45    2.03
  10  -6   2   16.71    2.39
 -10   6  -2   15.59    2.24
 -10   6  -2   14.33    1.92
 -10   6  -2   17.07    2.17
 -12  -6  -2   22.07    2.71
 -12  -6  -2   24.82    2.40
  12  -6   2   23.44    3.26
  12  -6   2   26.37    3.40
 -12   6  -2   22.00    2.42
 -12   6  -2   26.47    3.07
 -12   6  -2   21.50    2.49
  14  -6   2   30.03    3.34
  14  -6   2   38.84    3.84
 -14  -6  -2   43.33    3.03
 -14  -6  -2   35.33    3.10
 -14   6  -2   41.06    2.73
 -14   6  -2   36.21    2.97
 -14   6  -2   43.08    3.60
  16  -6   2   10.63    2.84
 -16  -6  -2    6.48    2.20
 -16  -6  -2    7.58    2.04
  16  -6   2   11.72    3.12
 -16   6  -2    9.33    2.49
 -16   6  -2    7.76    2.09
  18  -6   2    5.23    2.61
 -18  -6  -2    2.95    1.96
  18  -6   2    3.33    2.81
 -18  -6  -2    4.73    2.31
 -18   6  -2    3.13    2.38
 -18   6  -2    8.58    2.21
  20  -6   2   17.01    3.53
  20  -6   2   23.20    3.30
 -20  -6  -2   28.88    3.44
 -20  -6  -2   22.20    3.12
 -20   6  -2   17.86    3.15
 -20   6  -2   24.78    3.46
  22  -6   2   -3.59    2.74
 -22  -6  -2   -0.60    2.29
  22  -6   2    3.36    2.95
 -22  -6  -2   -1.78    2.39
 -22   6  -2    3.09    2.32
 -22   6  -2   -1.99    2.53
 -24  -6  -2    7.20    2.89
  24  -6   2    9.98    3.15
  24  -6   2   10.90    3.43
 -24  -6  -2   11.45    2.83
 -24   6  -2   13.77    2.90
 -24   6  -2    9.15    3.04
  26  -6   2    5.73    3.22
 -26  -6  -2    5.09    2.81
  26  -6   2    8.01    3.37
 -26  -6  -2    3.58    2.98
 -26   6  -2    8.92    2.92
 -26   6  -2    4.95    3.12
  28  -6   2    0.57    3.17
  28  -6   2   -0.47    3.16
 -28  -6  -2    1.29    2.97
 -28  -6  -2    3.19    2.74
 -28   6  -2    1.93    2.47
 -28   6  -2    8.08    3.24
 -30  -6  -2    9.97    3.25
  30  -6   2   12.04    3.67
 -30  -6  -2   12.51    3.57
  30  -6   2   12.55    3.69
 -30   6  -2    7.93    3.43
 -30   6  -2   13.49    3.31
 -32  -6  -2    4.85    3.39
  32  -6   2   -2.53    3.04
 -32  -6  -2    1.96    3.01
  32  -6   2    5.08    3.41
 -32   6  -2   -5.79    2.75
 -32   6  -2   -7.02    2.50
 -34  -6  -2   15.44    4.11
  34  -6   2   18.78    4.22
 -34  -6  -2   13.98    3.78
  34  -6   2   16.68    3.95
 -34   6  -2    8.73    3.80
 -34   6  -2   15.27    3.87
 -36  -6  -2    1.62    3.52
  36  -6   2    2.49    3.87
  36  -6   2    5.99    3.65
 -36  -6  -2    6.60    3.49
 -36   6  -2    5.13    3.46
 -36   6  -2    5.19    3.70
 -37  -7   2    1.91    3.65
  37  -7  -2   -0.60    3.35
 -37  -7   2    0.17    3.12
 -37   7   2    3.56    3.50
 -35  -7   2   12.95    3.95
  35  -7  -2   17.30    4.30
 -35  -7   2   12.06    3.66
 -35   7   2    6.07    3.58
  33  -7  -2    4.85    3.27
 -33  -7   2   -1.49    2.85
 -33  -7   2    3.32    3.40
 -33   7   2    0.95    2.79
 -33   7   2   -0.43    2.56
 -31  -7   2   23.90    4.10
  31  -7  -2   26.89    4.41
  31   7  -2   19.78    3.67
 -31   7   2   22.51    3.51
 -31   7   2   20.73    3.68
 -29  -7   2    5.38    3.19
  29   7  -2    7.90    3.19
 -29   7   2    9.81    2.80
 -29   7   2   16.54    3.27
 -27  -7   2    3.42    2.94
 -27   7   2    1.46    2.42
 -27   7   2    9.24    2.77
  27   7  -2    3.81    2.84
 -25  -7   2   24.17    3.58
  25   7  -2   22.71    3.50
 -25   7   2   16.44    3.08
 -25   7   2   21.65    3.03
 -23  -7   2   -2.21    2.37
  23   7  -2    3.68    3.04
 -23   7   2    3.31    2.30
 -23   7   2    2.95    2.11
  23   7  -2   -1.90    2.36
 -21  -7   2   21.84    3.31
 -21   7   2   20.59    2.88
  21   7  -2   22.61    3.16
  21   7  -2   19.76    3.54
 -21   7   2   20.96    2.96
 -19  -7   2    1.72    2.32
  19   7  -2    3.61    2.25
 -19   7   2    0.08    1.98
 -19   7   2    0.05    1.76
  19   7  -2    1.55    2.91
  17   7  -2    1.50    2.03
  17   7  -2    5.86    2.86
 -17   7   2    7.28    1.76
 -17   7   2    7.05    2.05
 -15   7   2   52.57    3.22
  15   7  -2   51.63    4.41
 -15   7   2   49.11    2.88
  15   7  -2   56.00    3.56
 -13  -7   2   -0.68    1.49
  13   7  -2   -5.44    2.16
 -13   7   2    0.98    1.20
 -13   7   2   -1.28    1.58
  13   7  -2    1.74    1.79
 -11  -7   2   26.70    2.64
 -11   7   2   31.12    2.60
  11   7  -2   26.62    3.99
  11   7  -2   27.42    2.58
 -11   7   2   27.30    1.83
  -9  -7   2   67.61    3.54
  -9   7   2   64.29    2.01
  -9   7   2   66.95    3.23
   9   7  -2   57.53    4.29
   9   7  -2   72.71    3.31
  -7  -7   2    3.64    1.93
  -7   7   2   -1.65    1.29
   7   7  -2   -2.30    2.00
   7   7  -2    0.53    1.44
  -5  -7   2  121.95    4.72
   5   7  -2  114.02    3.68
   5   7  -2  115.01    5.21
  -5   7   2  109.06    3.73
  -3  -7   2   62.71    3.88
   3   7  -2   62.80    2.71
   3   7  -2   61.84    2.37
   3   7  -2   58.15    4.34
  -1  -7   2    7.21    2.26
   1   7  -2    4.78    1.16
   1   7  -2    6.68    1.36
   1   7  -2    7.61    2.43
   1  -7   2   49.10    3.94
  -1   7  -2   49.23    2.45
  -1   7  -2   62.00    3.80
  -1   7  -2   56.26    3.33
  -1   7  -2   52.06    2.29
   3  -7   2    6.47    2.55
  -3   7  -2    6.18    1.30
  -3   7  -2   12.45    2.15
  -3   7  -2    9.33    1.35
  -3   7  -2    8.21    2.43
   5  -7   2    1.79    2.34
  -5   7  -2   -0.15    1.15
  -5   7  -2    2.64    2.00
  -5   7  -2   -0.33    1.06
  -5   7  -2   -0.43    1.73
  -7  -7  -2   -1.70    1.46
   7  -7   2    0.79    2.33
  -7   7  -2    1.91    1.34
  -7   7  -2    0.98    1.80
  -7   7  -2    2.73    2.02
  -9  -7  -2    5.43    1.68
   9  -7   2    2.94    2.57
  -9  -7  -2    5.61    1.37
  -9  -7  -2    2.40    1.48
  -9   7  -2    3.85    1.56
  -9   7  -2    9.59    2.17
  -9   7  -2    7.16    2.09
 -11  -7  -2   48.68    2.68
 -11  -7  -2   54.49    3.35
  11  -7   2   47.30    4.25
 -11   7  -2   43.96    3.40
 -11   7  -2   50.84    3.71
 -11   7  -2   52.18    3.14
 -13  -7  -2   -0.41    1.34
 -13  -7  -2   -0.26    1.67
  13  -7   2   -2.77    2.38
 -13   7  -2    0.95    1.78
 -13   7  -2   -0.48    1.59
 -13   7  -2    3.79    2.19
  15  -7   2   23.51    3.56
 -15  -7  -2   34.02    2.90
 -15  -7  -2   29.45    3.13
 -15   7  -2   26.36    2.81
 -15   7  -2   24.02    3.39
 -17  -7  -2   57.36    4.17
  17  -7   2   55.24    4.74
 -17  -7  -2   54.71    3.65
 -17   7  -2   54.43    3.79
 -17   7  -2   50.69    4.16
 -19  -7  -2   11.95    2.73
  19  -7   2   11.25    3.23
 -19  -7  -2   10.20    2.46
 -19   7  -2    9.50    2.91
 -19   7  -2   10.90    2.58
 -21  -7  -2   39.93    4.03
  21  -7   2   42.78    4.59
 -21  -7  -2   42.86    4.04
 -21   7  -2   45.22    4.34
 -21   7  -2   41.63    3.97
 -23  -7  -2   29.16    3.79
 -23  -7  -2   36.20    3.80
  23  -7   2   28.79    4.39
 -23   7  -2   39.74    4.28
 -23   7  -2   31.03    3.72
 -25  -7  -2    3.12    2.76
 -25  -7  -2    2.90    2.58
  25  -7   2    5.01    3.47
 -25   7  -2    1.52    2.74
 -25   7  -2   -0.18    2.37
 -27  -7  -2   18.87    3.47
 -27  -7  -2   23.40    3.85
  27  -7   2   15.42    4.08
 -27   7  -2   24.53    3.83
 -27   7  -2   23.28    3.51
 -29  -7  -2    4.32    3.08
  29  -7   2    5.00    3.44
 -29  -7  -2    3.58    3.19
 -29   7  -2    1.66    3.09
 -29   7  -2   -2.07    2.57
 -31  -7  -2    1.51    3.22
  31  -7   2   -1.44    3.31
  31  -7   2   -0.04    3.39
 -31  -7  -2   -0.47    3.01
 -31   7  -2   -1.88    2.79
 -31   7  -2    3.00    3.36
 -33  -7  -2   -0.24    3.36
  33  -7   2    2.86    3.62
 -33  -7  -2    1.01    3.22
  33  -7   2   -2.77    3.45
 -33   7  -2   -0.16    3.06
 -33   7  -2    0.23    3.31
  36  -8  -2   14.64    4.30
 -36  -8   2    6.66    3.69
 -36   8   2    4.28    3.39
  34  -8  -2    5.87    3.77
 -34  -8   2   12.01    3.84
 -34   8   2   10.01    3.44
  32  -8  -2   13.72    3.96
 -32  -8   2    6.58    3.57
 -32   8   2   12.84    3.35
 -30  -8   2   -4.06    2.85
  30  -8  -2    2.23    3.36
  30   8  -2    3.15    3.01
 -30   8   2   -2.23    2.47
 -28  -8   2    2.45    3.05
  28  -8  -2    1.22    2.92
  28   8  -2    4.94    2.89
 -28   8   2    5.28    2.74
 -26  -8   2    5.69    3.05
  26   8  -2    2.64    2.71
 -26   8   2   -2.10    2.37
 -24  -8   2    9.24    3.05
  24   8  -2    9.89    2.97
 -24   8   2   15.47    2.99
 -22  -8   2   25.47    3.63
 -22   8   2   26.71    3.62
  22   8  -2   35.18    3.86
  22   8  -2   29.66    4.42
 -20  -8   2    2.87    2.64
 -20   8   2    1.65    2.28
  20   8  -2    3.75    2.43
  20   8  -2    7.62    3.25
 -18  -8   2   26.41    3.62
  18   8  -2   30.95    3.36
  18   8  -2   26.82    4.00
 -18   8   2   33.69    3.14
  16   8  -2   72.08    5.63
  16   8  -2   74.88    4.14
 -16   8   2   82.40    4.13
  14   8  -2    0.41    2.61
 -14   8   2   -1.42    1.70
  14   8  -2   -0.66    1.86
 -12  -8   2   20.44    2.51
  12   8  -2   18.40    2.70
  12   8  -2   16.04    3.53
 -12   8   2   20.80    2.67
 -10  -8   2    2.05    1.95
  10   8  -2    1.13    2.70
  10   8  -2   -1.34    1.60
 -10   8   2    1.47    1.70
  -8  -8   2   14.55    2.38
  -8   8   2   10.60    1.97
   8   8  -2   13.07    3.30
   8   8  -2   14.22    2.04
  -6  -8   2   20.90    2.83
   6   8  -2   20.23    2.39
   6   8  -2   20.73    3.41
  -4  -8   2   36.43    3.55
   4   8  -2   40.76    2.55
   4   8  -2   36.83    4.23
  -2  -8   2    5.04    2.37
   2   8  -2    7.87    1.50
   2   8  -2    5.38    2.54
   0  -8   2    5.76    2.30
   0   8  -2    3.90    2.56
   2  -8   2   72.63    4.75
  -2   8  -2   76.27    4.00
  -2   8  -2   71.35    4.64
  -4  -8  -2   88.48    4.26
   4  -8   2   74.03    5.04
  -4   8  -2   85.88    4.77
  -4   8  -2   91.94    4.32
   6  -8   2    7.77    2.94
  -6  -8  -2    4.54    2.05
  -6   8  -2    4.80    2.06
  -6   8  -2    3.98    2.38
   8  -8   2   42.72    4.23
  -8   8  -2   40.38    3.57
  -8   8  -2   46.89    3.54
 -10  -8  -2   27.84    2.85
  10  -8   2   19.95    3.49
 -10   8  -2   24.06    3.21
 -10   8  -2   21.31    2.88
  12  -8   2    9.29    3.14
 -12  -8  -2   12.45    2.30
 -12   8  -2   14.29    2.61
 -12   8  -2   11.64    2.58
  14  -8   2   22.90    3.74
 -14  -8  -2   27.41    3.25
 -14   8  -2   25.34    3.53
  16  -8   2    0.81    2.70
 -16  -8  -2    1.25    2.22
 -16   8  -2    2.83    2.39
  18  -8   2   11.23    3.35
 -18  -8  -2   15.11    2.86
 -18   8  -2    9.72    2.79
  20  -8   2    6.54    3.22
 -20  -8  -2   -2.33    2.40
 -20   8  -2    1.20    2.62
 -22  -8  -2   -1.03    2.49
  22  -8   2   -2.41    2.95
 -22   8  -2    0.53    2.70
  24  -8   2   19.22    4.23
 -24  -8  -2   18.15    3.46
 -24   8  -2   24.58    3.83
 -26  -8  -2    7.99    3.20
  26  -8   2    4.85    3.61
 -26   8  -2    6.14    3.15
  28  -8   2   18.11    4.40
 -28  -8  -2   17.90    3.97
 -28   8  -2   13.35    3.67
 -30  -8  -2   21.99    4.21
  30  -8   2   16.53    4.35
 -30   8  -2   21.87    4.27
  32  -8   2    3.82    3.87
 -32  -8  -2   -0.51    3.22
 -32   8  -2    4.09    3.47
 -33  -9   2    1.98    3.45
  33  -9  -2   -2.12    3.55
 -31  -9   2    9.56    3.66
  31  -9  -2   16.21    4.25
 -29  -9   2   13.41    3.73
  29  -9  -2   11.98    3.78
  29   9  -2   19.34    3.65
  27  -9  -2    5.85    3.56
 -27  -9   2    4.11    3.19
  27   9  -2    9.40    3.33
  25  -9  -2   20.45    4.21
 -25  -9   2   27.37    4.02
  25   9  -2   26.99    3.95
 -23  -9   2   30.40    4.17
  23  -9  -2   36.49    4.70
  23   9  -2   42.26    4.38
 -21  -9   2    2.10    2.77
  21   9  -2    2.32    2.35
  21   9  -2   -0.58    3.00
 -19  -9   2   28.22    3.90
  19   9  -2   24.42    4.31
  19   9  -2   25.60    3.40
  17   9  -2   22.89    4.03
 -17   9   2   21.19    2.84
  17   9  -2   15.37    2.75
  15   9  -2   48.44    5.10
 -15   9   2   33.72    3.32
  13   9  -2    5.43    2.99
 -13   9   2    1.87    1.93
 -11   9   2   28.30    2.92
  11   9  -2   24.47    4.08
  -9  -9   2   10.98    2.57
  -9   9   2   11.86    2.09
   9   9  -2    8.65    3.34
  -7  -9   2   18.76    3.00
   7   9  -2   12.90    3.54
  -5  -9   2   31.03    3.80
   5   9  -2   26.41    3.93
  -3  -9   2   38.32    4.03
   3   9  -2   39.27    4.49
  -1  -9   2    7.34    2.77
   1  -9  -2    2.99    2.52
   1   9  -2    4.69    2.81
   1  -9   2   21.31    3.46
  -1  -9  -2   22.16    3.22
  -1   9  -2   22.84    3.53
  -3  -9  -2   66.54    4.23
   3  -9   2   75.73    5.15
  -3   9  -2   73.52    4.15
  -3   9  -2   82.56    5.26
  -5  -9  -2   36.00    3.52
   5  -9   2   32.82    4.45
  -5   9  -2   33.18    4.16
  -5   9  -2   36.05    3.41
   7  -9   2    2.54    2.77
  -7   9  -2   -1.39    2.39
  -7   9  -2   -2.82    2.02
   9  -9   2   13.59    3.43
  -9   9  -2   15.77    2.81
  -9   9  -2   19.85    3.02
  11  -9   2   24.84    3.91
 -11   9  -2   30.29    3.76
  13  -9   2    5.42    3.19
 -13   9  -2    0.71    2.43
  15  -9   2   43.42    4.92
 -15   9  -2   54.32    4.27
  17  -9   2   19.03    4.22
 -17   9  -2   18.40    3.31
  19  -9   2    5.89    3.35
 -19   9  -2   -3.66    2.43
  21  -9   2   43.08    5.04
 -21   9  -2   50.70    4.60
  23  -9   2   33.87    5.00
 -23   9  -2   34.07    4.35
  25  -9   2    1.48    3.69
 -25   9  -2    4.99    3.16
  27  -9   2   21.14    4.64
 -27   9  -2   14.85    3.98
  29  -9   2    3.26    3.88
 -29   9  -2   -0.68    3.16
 -30 -10   2   11.03    3.73
  30 -10  -2   13.64    4.14
 -28 -10   2    1.08    3.22
  28 -10  -2    1.12    3.31
  26 -10  -2   44.18    5.30
 -26 -10   2   35.05    4.74
 -24 -10   2   33.74    4.51
  24 -10  -2   32.84    5.21
 -22 -10   2    2.31    3.05
  22 -10  -2    0.97    3.24
 -20 -10   2   11.16    3.14
  20 -10  -2    2.56    3.26
 -18 -10   2   38.42    4.41
  18 -10  -2   42.67    4.84
  18  10  -2   41.03    4.94
  16 -10  -2   14.53    3.87
  16  10  -2   19.47    4.18
  14 -10  -2   -0.04    2.85
  14  10  -2    2.56    3.30
  12 -10  -2   31.85    4.26
  12  10  -2   28.26    4.30
  10 -10  -2   46.50    4.96
  10  10  -2   47.11    5.18
   8 -10  -2    5.07    2.85
  -8 -10   2    8.04    2.79
   8  10  -2    6.43    3.33
  -6 -10   2   33.30    4.27
   6 -10  -2   30.60    4.26
   6  10  -2   25.55    4.24
   4 -10  -2   46.43    4.55
  -4 -10   2   45.35    4.39
   4  10  -2   33.46    4.68
  -2 -10   2   13.43    3.20
   2 -10  -2   14.39    3.21
   2  10  -2   20.63    3.76
   0 -10   2   25.77    3.85
   0 -10  -2   30.42    3.90
   0  10  -2   31.64    4.47
  -2 -10  -2   13.34    3.12
   2 -10   2   21.21    3.75
  -2  10  -2   22.66    3.70
   4 -10   2   -0.51    2.87
  -4  10  -2   -0.01    2.62
   6 -10   2   -1.59    2.90
  -6  10  -2    6.60    2.87
  -6  10  -2    6.54    2.53
   8 -10   2   43.48    4.62
  -8  10  -2   42.22    4.31
  -8  10  -2   33.86    3.93
  10 -10   2   21.79    3.97
 -10  10  -2   27.56    3.74
  12 -10   2    0.86    3.24
 -12  10  -2   -1.01    2.38
  14 -10   2   27.35    4.48
 -14  10  -2   23.76    3.42
  16 -10   2   53.68    5.84
 -16  10  -2   56.03    4.76
  18 -10   2    4.38    3.45
 -18  10  -2    4.61    2.88
  20 -10   2   32.84    5.12
 -20  10  -2   41.75    4.41
  22 -10   2   41.60    5.66
 -22  10  -2   38.40    4.55
  24 -10   2    2.14    3.82
 -24  10  -2    7.93    3.22
  26 -10   2   -0.53    3.40
 -26  10  -2    3.03    3.10
  27 -11  -2    5.05    3.99
  25 -11  -2   -0.09    3.87
  23 -11  -2   18.43    4.87
  21 -11  -2    2.45    3.96
  19 -11  -2   56.19    6.19
  17 -11  -2   82.72    6.28
  15 -11  -2   -1.43    3.37
  15  11  -2    3.47    3.24
  13 -11  -2   45.13    5.50
  13  11  -2   63.56    5.92
  11 -11  -2   37.70    4.74
  11  11  -2   43.52    4.88
   9 -11  -2    3.30    3.31
   9  11  -2   -2.06    2.80
   7 -11  -2    7.57    3.44
   7  11  -2    8.91    3.55
  -5 -11   2   11.30    3.25
   5 -11  -2   13.78    3.50
   5  11  -2   19.01    4.00
  -3 -11   2   14.84    3.69
   3 -11  -2   22.05    3.81
   3  11  -2   17.80    3.85
  -1 -11   2    2.32    3.03
   1 -11  -2    3.54    2.92
   1  11  -2    3.81    3.13
  -1 -11  -2   30.98    4.22
   1 -11   2   25.51    4.07
  -1  11  -2   31.49    4.45
   3 -11   2   33.61    4.54
  -3  11  -2   32.36    4.58
   5 -11   2    7.26    3.48
  -5  11  -2   14.14    3.34
   7 -11   2   24.37    4.37
  -7  11  -2   24.91    3.37
  -7  11  -2   27.90    4.10
   9 -11   2   64.26    5.83
  -9  11  -2   67.31    4.72
  11 -11   2    4.22    3.74
 -11  11  -2    6.99    2.72
  13 -11   2   30.18    4.66
  15 -11   2   66.93    5.89
  17 -11   2    7.12    3.89
  19 -11   2    2.73    3.90
  21 -11   2   -4.70    3.62
  23 -11   2   12.25    4.55
  22 -12  -2    6.44    3.95
  20 -12  -2    2.12    3.66
  18 -12  -2   18.08    4.54
  16 -12  -2    7.17    4.00
  14 -12  -2    0.57    3.64
  12 -12  -2    0.48    3.45
  10 -12  -2   44.25    5.40
   8 -12  -2    1.60    3.39
   6 -12  -2   36.53    4.94
   4 -12  -2   60.20    5.51
   2 -12  -2    2.12    3.19
  -2 -12   2    5.91    3.29
   0 -12   2   33.80    4.98
   2 -12   2   29.50    4.57
   4 -12   2   -0.93    3.39
   6 -12   2   -3.29    3.40
   8 -12   2    7.26    3.74
  10 -12   2   14.96    4.25
  12 -12   2    9.98    4.21
  14 -12   2   12.30    4.19
  16 -12   2   41.73    5.61
  18 -12   2    2.90    3.94
  15 -13  -2    2.64    3.76
  13 -13  -2    5.10    4.21
  11 -13  -2   13.59    4.60
   9 -13  -2    1.12    3.76
   7 -13  -2   13.35    4.36
   5 -13  -2    0.74    3.52
   1 -13   2   -6.60    3.27
   3 -13   2   32.72    5.16
   5 -13   2    6.20    4.05
   7 -13   2   12.87    4.59
   9 -13   2   15.18    4.32
  11 -13   2   -1.59    3.48
 -44   0   3    2.54    3.46
 -44   0   3   -2.37    3.10
  42   0  -3    3.48    2.54
 -42   0   3   -1.49    3.10
 -42   0   3   -1.59    2.91
 -40   0   3    4.81    3.05
  40   0  -3   -5.11    2.31
 -40   0   3    1.83    3.17
 -38   0   3   -0.80    2.90
 -38   0   3    2.08    3.17
  38   0  -3   -2.48    2.30
 -36   0   3   -1.23    2.51
  36   0  -3    0.11    2.27
 -36   0   3   -4.84    2.70
  34   0  -3   -0.43    2.26
 -34   0   3   -2.86    2.48
 -32   0   3   -0.88    2.63
  32   0  -3    1.96    2.74
  32   0  -3   -2.75    2.20
 -30   0   3    2.67    2.41
  30   0  -3   -1.87    2.48
  30   0  -3    1.10    2.20
  28   0  -3    1.56    2.25
 -28   0   3   -1.42    2.13
  28   0  -3    1.61    2.12
 -26   0   3    3.05    2.11
  26   0  -3   -2.25    1.89
  26   0  -3   -0.74    2.24
 -24   0   3   -3.19    1.66
  24   0  -3    0.50    1.74
  24   0  -3   -0.05    1.31
  24   0  -3   -0.43    1.90
  22   0  -3    0.17    2.01
 -22   0   3    1.43    1.72
  22   0  -3   -0.19    1.30
  22   0  -3   -1.86    1.64
  20   0  -3    2.05    1.56
  20   0  -3   -0.85    1.83
 -20   0   3   -1.20    1.55
  20   0  -3    1.28    1.29
  18   0  -3    1.59    1.72
  18   0  -3    0.24    1.35
 -18   0   3   -0.02    1.73
  18   0  -3   -0.34    1.50
 -16   0   3   -1.50    1.44
  16   0  -3   -0.09    1.73
 -14   0   3   -0.03    1.59
  14   0  -3    0.11    1.65
  12   0  -3    0.44    1.43
 -12   0   3   -1.22    1.28
 -10   0   3   -2.57    1.30
  10   0  -3   -0.13    1.30
   8   0  -3    0.99    1.30
   8   0  -3    2.21    1.37
   6   0  -3   -0.12    1.17
   6   0  -3   -0.08    1.19
   4   0  -3   -0.10    1.00
   4   0  -3   -1.21    0.99
  -4   0   3   -0.83    1.16
   2   0  -3   -1.16    0.85
   2   0  -3   -0.78    0.87
  -2   0   3    1.53    1.04
   0   0   3   -0.16    1.19
   0   0  -3    0.27    1.02
   0   0  -3   -2.04    0.97
   2   0   3   -0.33    1.28
  -2   0  -3    1.31    1.27
  -2   0  -3   -1.93    1.11
  -4   0  -3    1.15    1.25
  -4   0  -3   -0.99    1.35
   4   0   3    0.30    1.22
   6   0   3   -1.66    1.26
  -6   0  -3   -0.88    1.40
  -6   0  -3    0.09    1.37
  -8   0  -3    0.35    1.55
  -8   0  -3   -1.24    1.37
   8   0   3    4.22    1.31
 -10   0  -3   -2.31    1.40
 -10   0  -3   -1.54    1.58
  10   0   3    1.62    1.38
 -12   0  -3    1.83    1.74
 -12   0  -3   -0.98    1.68
  12   0   3   -0.82    1.34
 -14   0  -3    0.24    1.80
 -14   0  -3    1.06    1.71
  14   0   3   -1.17    1.37
  16   0   3   -1.23    1.38
 -16   0  -3   -2.57    1.72
 -16   0  -3   -0.74    1.67
  18   0   3   -1.97    1.42
 -18   0  -3    1.17    1.91
 -18   0  -3    1.76    1.91
 -20   0  -3    1.34    2.02
  20   0   3    0.13    1.67
 -20   0  -3    2.54    2.26
 -22   0  -3    2.24    2.33
 -22   0  -3   -2.35    2.24
  22   0   3   -0.69    1.64
 -24   0  -3   -2.20    2.08
  24   0   3    0.90    1.90
 -24   0  -3   -1.87    2.28
 -26   0  -3   -1.71    2.35
 -26   0  -3   -3.37    2.47
 -28   0  -3   -0.36    2.50
 -28   0  -3    3.75    2.67
 -30   0  -3   -1.52    2.88
 -30   0  -3    2.38    2.97
 -32   0  -3    0.21    3.15
 -32   0  -3   -1.17    2.64
 -34   0  -3   -4.92    3.15
 -34   0  -3    3.51    3.04
 -36   0  -3    5.64    3.52
 -36   0  -3    7.17    3.82
 -38   0  -3   -3.78    3.41
 -38   0  -3    0.08    3.37
  43  -1  -3    1.28    2.84
 -43  -1   3    5.15    3.67
 -43  -1   3   -0.11    3.19
 -43   1   3    2.50    3.22
 -43   1   3    3.06    3.28
 -41  -1   3    5.77    3.57
 -41  -1   3    8.17    3.45
  41  -1  -3    5.66    2.91
 -41   1   3    8.06    3.43
 -41   1   3   12.96    3.81
 -39  -1   3   -5.10    2.87
 -39  -1   3   -3.49    2.93
  39  -1  -3    0.38    2.67
 -39   1   3    2.89    2.88
 -39   1   3    1.61    3.06
 -37  -1   3   -0.63    3.02
  37  -1  -3   -2.82    2.49
 -37  -1   3   -0.63    2.86
  37   1  -3    2.73    2.21
 -37   1   3    6.51    3.21
 -37   1   3    2.41    2.83
 -35  -1   3    2.49    2.77
  35  -1  -3    0.30    2.49
 -35   1   3    2.70    2.72
  35   1  -3    6.01    3.13
 -35   1   3   -5.90    2.23
  35   1  -3    1.24    2.03
 -33  -1   3   11.19    3.03
  33  -1  -3    8.50    2.72
  33   1  -3    7.07    3.18
  33   1  -3    4.29    2.19
 -33   1   3    7.42    2.85
 -31  -1   3    6.68    2.92
  31  -1  -3   11.40    2.90
  31  -1  -3    7.76    2.57
  31   1  -3   10.97    2.93
 -31   1   3   11.64    2.95
  31   1  -3   13.34    2.33
 -29  -1   3    2.31    2.64
  29  -1  -3   -0.44    2.21
  29  -1  -3    5.91    2.55
  29   1  -3    4.29    2.01
 -29   1   3    1.31    2.52
  29   1  -3    3.19    2.51
  27  -1  -3   28.42    3.22
  27  -1  -3   27.91    3.38
 -27  -1   3   35.36    3.74
  27   1  -3   32.35    2.83
  27   1  -3   30.34    3.62
 -27   1   3   37.60    3.85
  25  -1  -3   79.76    3.80
 -25  -1   3   61.23    3.98
  25  -1  -3   69.39    4.44
  25   1  -3   66.49    3.31
  25   1  -3   70.15    3.43
 -25   1   3   67.48    4.23
  25   1  -3   79.24    4.74
 -23  -1   3    1.70    2.00
  23  -1  -3    1.93    1.88
  23  -1  -3    0.39    1.97
 -23   1   3    1.13    1.86
  23   1  -3   -2.87    1.47
  23   1  -3    0.69    1.56
  23   1  -3    1.68    1.91
 -21  -1   3    8.28    1.99
  21  -1  -3    8.20    2.23
  21  -1  -3    7.17    1.84
  21  -1  -3    6.55    1.16
  21   1  -3    8.28    2.29
  21   1  -3    8.67    1.79
  21   1  -3    9.12    1.70
 -21   1   3    3.69    2.00
  19  -1  -3   10.65    2.04
 -19  -1   3   12.51    2.26
  19  -1  -3   11.72    1.58
  19  -1  -3    9.79    1.81
  19   1  -3   10.66    1.86
  19   1  -3   10.72    2.12
  19   1  -3   11.92    1.73
 -19   1   3    9.25    2.10
 -17  -1   3    0.14    1.53
  17  -1  -3   -0.02    1.67
 -17   1   3    0.69    1.67
  17   1  -3    0.22    1.58
  17   1  -3    0.40    1.42
  17   1  -3   -2.81    1.74
 -15  -1   3    9.06    1.80
  15  -1  -3   15.36    2.08
 -15   1   3   10.50    1.86
  15   1  -3   12.77    2.02
  13  -1  -3   11.55    1.81
 -13  -1   3   12.34    1.87
  13   1  -3   13.21    1.90
 -13   1   3   12.19    1.69
  11  -1  -3   21.50    2.05
 -11   1   3   23.68    2.21
  11   1  -3   24.42    2.34
   9  -1  -3    0.32    1.25
  -9   1   3   -0.06    1.18
   9   1  -3    1.28    1.51
  -7  -1   3   -0.44    1.25
   7  -1  -3    0.81    1.26
   7  -1  -3    0.76    1.26
  -7   1   3    1.48    1.03
   7   1  -3   -1.51    1.28
   7   1  -3    2.06    1.29
   5  -1  -3   96.63    2.72
   5  -1  -3   99.08    2.79
  -5  -1   3   93.08    2.90
   5   1  -3   94.42    2.89
   5   1  -3   92.30    3.03
  -3  -1   3   12.11    1.87
   3  -1  -3   11.23    1.55
  -3   1   3   11.10    0.98
   3   1  -3   11.86    1.41
   3   1  -3   13.12    1.94
   1  -1  -3  229.81    4.13
   1  -1  -3  226.51    4.58
  -1  -1   3  231.40    5.20
  -1   1   3  224.94    4.12
   1   1  -3  233.78    4.95
   1   1  -3  231.01    4.80
  -1  -1  -3    4.52    1.02
   1  -1   3    1.87    1.44
  -1  -1  -3    1.96    1.14
   1   1   3    1.68    1.13
  -1   1  -3    2.08    1.29
  -1   1  -3    2.22    1.19
   3  -1   3    2.32    1.58
  -3  -1  -3    0.86    1.25
  -3  -1  -3    3.49    1.20
   3   1   3    2.22    1.13
  -3   1  -3    2.79    1.37
  -3   1  -3    3.54    1.41
   5  -1   3  294.18    6.55
  -5  -1  -3  300.77    6.22
  -5  -1  -3  302.72    6.49
  -5   1  -3  301.81    6.56
   5   1   3  306.66    5.92
  -5   1  -3  308.70    6.64
   7  -1   3    0.81    1.36
  -7  -1  -3   -0.51    1.33
  -7  -1  -3    3.84    1.48
   7  -1   3    0.19    1.45
  -7   1  -3    0.58    1.39
  -7   1  -3   -1.38    1.49
   7   1   3    1.38    1.07
   9  -1   3    1.32    1.52
  -9  -1  -3    3.13    1.48
  -9  -1  -3   -1.82    1.50
   9  -1   3    1.58    1.46
   9   1   3    1.07    1.11
  -9   1  -3    1.99    1.69
  -9   1  -3   -0.80    1.38
 -11  -1  -3   37.61    2.78
 -11  -1  -3   40.79    3.14
  11  -1   3   40.34    2.80
  11  -1   3   41.30    2.73
 -11   1  -3   39.09    2.89
 -11   1  -3   41.20    3.15
  11   1   3   44.06    2.15
 -13  -1  -3    3.62    1.77
  13  -1   3    4.22    1.65
 -13  -1  -3    6.47    1.93
  13  -1   3    4.58    1.76
 -13   1  -3    4.96    1.93
  13   1   3    6.80    1.38
 -13   1  -3    5.30    1.98
  15  -1   3   44.91    2.91
 -15  -1  -3   46.01    3.59
  15  -1   3   54.11    3.17
 -15  -1  -3   47.69    3.21
 -15   1  -3   47.63    3.52
 -15   1  -3   50.74    3.60
  15   1   3   47.73    2.37
 -17  -1  -3   -1.56    1.68
  17  -1   3   -0.12    1.63
  17  -1   3    0.00    1.60
 -17  -1  -3    2.64    1.85
 -17   1  -3    3.12    1.98
  17   1   3    1.00    1.31
 -17   1  -3   -1.31    1.71
  19  -1   3    3.77    1.78
 -19  -1  -3    2.52    2.00
  19  -1   3    0.97    1.90
 -19  -1  -3    1.51    2.09
 -19   1  -3    1.78    2.13
 -19   1  -3    1.46    1.95
  19   1   3    2.26    1.39
 -21  -1  -3   -1.15    1.99
  21  -1   3   -5.02    1.77
 -21  -1  -3    0.40    2.25
  21   1   3   -2.03    1.50
 -21   1  -3    1.24    2.27
 -21   1  -3    1.71    2.08
 -23  -1  -3    7.55    2.73
  23  -1   3    7.58    2.35
 -23  -1  -3    5.22    2.66
 -23   1  -3    8.20    2.70
 -23   1  -3    6.97    2.58
 -25  -1  -3    2.23    2.63
  25  -1   3   -0.52    2.08
 -25  -1  -3    2.45    2.71
 -25   1  -3    0.06    2.30
 -25   1  -3   -1.29    2.21
 -27  -1  -3    0.14    2.36
 -27  -1  -3   -3.14    2.58
  27  -1   3   -2.10    2.27
 -27   1  -3    1.05    2.37
 -27   1  -3    0.66    2.45
 -29  -1  -3   -2.94    2.61
 -29  -1  -3   -0.30    2.55
 -29   1  -3    3.38    2.84
 -29   1  -3    2.17    2.83
 -31  -1  -3    1.47    2.70
 -31  -1  -3   -3.46    2.60
 -31   1  -3   -6.28    2.83
 -31   1  -3   -2.71    2.31
 -33  -1  -3    2.57    3.04
 -33  -1  -3    6.92    3.50
 -33   1  -3    3.93    3.12
 -33   1  -3    4.93    3.23
 -35  -1  -3    0.51    3.11
 -35  -1  -3    0.68    3.34
 -35   1  -3    0.27    2.87
 -35   1  -3   -0.63    3.25
 -37  -1  -3    4.61    3.30
 -37  -1  -3    2.08    3.57
 -37   1  -3    0.15    2.98
 -37   1  -3    5.00    3.74
 -39  -1  -3   -1.68    3.48
 -39  -1  -3    4.28    3.87
 -39   1  -3    4.65    3.94
 -39   1  -3    1.77    3.33
  44  -2  -3   17.95    3.67
 -44  -2   3   19.99    4.68
 -44  -2   3   19.15    4.53
 -44   2   3   25.65    4.70
 -44   2   3   15.47    4.30
 -42  -2   3    0.38    3.49
 -42  -2   3   -0.80    3.31
  42  -2  -3   -2.57    2.91
 -42   2   3   -0.25    3.23
 -42   2   3   -1.76    3.16
  40  -2  -3   33.86    4.16
 -40  -2   3   32.26    4.80
 -40  -2   3   27.98    4.34
 -40   2   3   40.82    5.12
 -40   2   3   37.27    4.57
 -38  -2   3    7.78    3.66
  38  -2  -3    3.97    2.96
 -38  -2   3    3.35    3.06
 -38   2   3    1.95    2.88
 -38   2   3    9.68    3.51
  36  -2  -3   12.49    3.09
 -36  -2   3    8.20    3.54
 -36   2   3   10.04    3.32
 -36   2   3   12.82    3.45
  36   2  -3    8.54    3.21
  34  -2  -3   24.74    3.35
 -34  -2   3   22.93    3.89
  34   2  -3   23.52    3.77
 -34   2   3   24.11    3.66
 -34   2   3   22.47    3.81
  32  -2  -3    1.66    2.53
 -32  -2   3   -1.26    2.37
  32   2  -3    2.17    1.62
 -32   2   3    1.14    2.66
  32   2  -3    3.85    2.62
 -32   2   3   -4.47    2.39
  30  -2  -3   36.49    3.76
 -30  -2   3   40.32    3.96
  30   2  -3   38.01    2.57
  30   2  -3   34.08    4.27
 -30   2   3   39.12    4.19
  28  -2  -3    9.46    2.62
  28  -2  -3    5.53    2.43
 -28  -2   3    8.06    2.57
 -28   2   3    5.43    2.35
  28   2  -3    5.04    1.66
  28   2  -3    7.00    2.33
  28   2  -3    3.65    2.47
  26  -2  -3   -1.62    1.94
  26  -2  -3   -1.56    2.10
 -26  -2   3   -0.40    1.98
  26   2  -3    1.07    1.47
  26   2  -3   -0.39    2.08
  26   2  -3    0.10    1.90
 -26   2   3    0.33    2.16
  24  -2  -3   23.56    2.76
 -24  -2   3   20.61    2.79
  24  -2  -3   24.47    2.92
  24   2  -3   23.07    2.76
  24   2  -3   22.37    3.14
  24   2  -3   19.81    2.14
 -24   2   3   23.69    3.20
  22  -2  -3   -1.54    1.83
 -22  -2   3    6.16    2.09
  22  -2  -3    4.23    2.03
  22   2  -3    2.25    1.39
  22   2  -3    2.85    1.86
  22   2  -3    4.87    2.21
 -22   2   3    7.16    2.19
  20  -2  -3    3.76    1.87
 -20  -2   3    3.85    1.85
  20  -2  -3    1.94    1.66
  20   2  -3    2.48    1.96
 -20   2   3    5.24    1.91
  20   2  -3    2.29    1.79
  20   2  -3    0.37    1.21
  18  -2  -3    6.66    1.93
 -18  -2   3    6.39    1.89
  18   2  -3    7.61    1.36
 -18   2   3    8.95    1.97
  18   2  -3    7.71    2.04
  18   2  -3    6.56    2.12
 -16  -2   3    2.96    1.71
  16  -2  -3    3.47    1.74
  16   2  -3    1.76    1.92
  16   2  -3    6.33    1.95
 -16   2   3    3.27    1.68
  16   2  -3    3.49    1.26
  14  -2  -3  208.79    5.40
 -14  -2   3  219.68    5.79
  14   2  -3  211.49    5.79
  14   2  -3  218.29    4.30
 -14   2   3  211.15    5.40
  12  -2  -3   88.14    3.31
  12   2  -3   86.71    3.52
 -12   2   3   90.25    3.16
  10  -2  -3   38.60    2.12
 -10  -2   3   33.03    2.04
 -10   2   3   36.66    2.26
  10   2  -3   36.42    2.79
   8  -2  -3   33.45    1.96
  -8  -2   3   30.69    2.22
   8   2  -3   31.33    2.35
   8   2  -3   32.58    2.43
  -8   2   3   36.02    1.95
   6  -2  -3    0.71    1.06
  -6  -2   3   -0.12    1.29
   6  -2  -3   -1.01    0.96
   6   2  -3    2.33    1.30
   6   2  -3    0.33    1.38
  -6   2   3    1.88    0.81
  -4  -2   3   62.29    2.85
   4  -2  -3   59.72    2.00
   4  -2  -3   62.85    2.08
   4   2  -3   65.18    2.56
   4   2  -3   64.06    2.24
   4   2  -3   60.74    2.62
   2  -2  -3   91.84    2.44
   2   2  -3   95.49    3.02
   2   2  -3   99.45    3.12
   0  -2  -3   50.64    1.93
   0  -2  -3   49.13    1.59
   0  -2   3   48.36    2.73
   0   2  -3   46.07    2.50
   0   2  -3   51.29    2.20
   0   2   3   46.60    1.54
  -2  -2  -3   21.06    1.83
  -2  -2  -3   19.85    1.59
   2  -2   3   23.92    2.72
   2  -2   3   20.34    2.05
  -2   2  -3   18.35    2.16
  -2   2  -3   21.39    2.51
  -4  -2  -3  234.41    4.98
   4  -2   3  237.98    5.14
   4  -2   3  240.27    5.81
  -4  -2  -3  233.75    5.18
  -4   2  -3  232.60    5.62
  -4   2  -3  236.50    5.40
  -6  -2  -3   34.19    2.39
  -6  -2  -3   36.07    2.44
   6  -2   3   34.99    2.35
   6  -2   3   36.48    2.64
  -6   2  -3   30.39    2.31
  -6   2  -3   35.52    2.54
  -8  -2  -3  152.50    4.51
   8  -2   3  146.13    4.12
  -8  -2  -3  160.29    4.43
   8  -2   3  152.29    4.87
   8   2   3  156.30    3.35
  -8   2  -3  155.32    4.60
  -8   2  -3  151.97    4.64
  10  -2   3  119.39    4.08
 -10  -2  -3  117.38    4.10
  10  -2   3  117.80    4.35
 -10  -2  -3  114.01    4.17
  10   2   3  118.40    2.80
 -10   2  -3  116.81    4.31
 -10   2  -3  121.08    4.44
 -12  -2  -3   39.17    3.07
  12  -2   3   44.01    2.88
  12  -2   3   42.59    3.07
 -12  -2  -3   43.52    3.21
  12   2   3   40.52    1.72
 -12   2  -3   46.96    3.04
 -12   2  -3   39.28    2.95
  14  -2   3  126.89    4.61
  14  -2   3  110.90    4.14
 -14  -2  -3  115.40    4.69
 -14  -2  -3  116.88    4.59
 -14   2  -3  123.78    4.80
 -14   2  -3  119.77    4.59
  14   2   3  118.14    2.92
 -16  -2  -3   38.22    3.30
 -16  -2  -3   35.38    3.08
  16  -2   3   36.21    3.12
  16  -2   3   37.51    3.08
 -16   2  -3   36.28    3.12
  16   2   3   35.54    1.79
 -16   2  -3   36.57    3.37
 -18  -2  -3   42.20    3.43
 -18  -2  -3   45.08    3.38
  18  -2   3   43.85    3.56
  18  -2   3   40.86    3.23
 -18   2  -3   40.53    3.38
 -18   2  -3   44.08    3.69
  18   2   3   43.46    2.01
 -20  -2  -3    1.09    2.23
  20  -2   3    3.31    2.03
 -20  -2  -3    1.98    2.20
  20  -2   3   -1.41    2.02
 -20   2  -3   -1.94    1.78
 -20   2  -3   -0.91    1.97
  22  -2   3    1.19    2.09
 -22  -2  -3   -4.56    1.88
  22  -2   3   -0.58    2.29
 -22  -2  -3    2.83    2.31
 -22   2  -3   -1.22    2.34
 -22   2  -3    0.92    2.25
  24  -2   3    4.45    2.33
 -24  -2  -3   -1.08    2.46
  24  -2   3    0.57    2.42
 -24  -2  -3    0.64    2.64
 -24   2  -3    2.02    2.23
 -24   2  -3    2.08    2.66
  26  -2   3   -3.91    2.25
  26  -2   3    1.54    2.36
 -26  -2  -3    1.51    2.62
 -26  -2  -3    0.12    2.35
 -26   2  -3    0.45    2.55
 -26   2  -3   -1.71    2.25
 -28  -2  -3   23.61    3.67
  28  -2   3   29.76    3.93
 -28  -2  -3   30.50    4.30
 -28   2  -3   26.38    4.07
 -28   2  -3   31.95    4.36
 -30  -2  -3   46.38    4.62
 -30  -2  -3   42.35    4.53
 -30   2  -3   45.57    4.90
 -30   2  -3   48.68    4.99
 -32  -2  -3   23.65    4.19
 -32  -2  -3   26.14    4.01
 -32   2  -3   33.41    4.78
 -32   2  -3   21.32    3.84
 -34  -2  -3   28.10    4.53
 -34  -2  -3   27.76    4.28
 -34   2  -3   40.85    5.17
 -34   2  -3   35.19    4.99
 -36  -2  -3    1.82    3.32
 -36  -2  -3    1.49    3.14
 -36   2  -3   -2.03    2.90
 -36   2  -3    2.54    3.09
 -38  -2  -3   12.83    3.80
 -38  -2  -3    6.13    3.87
 -38   2  -3    4.05    3.31
 -38   2  -3    3.85    3.79
  43  -3  -3    7.27    3.61
 -43  -3   3    4.37    3.55
 -43  -3   3    2.87    3.49
 -43   3   3    3.97    3.27
 -43   3   3    3.65    3.63
 -41  -3   3    9.41    3.57
  41  -3  -3    5.88    3.14
 -41  -3   3    9.82    3.80
 -41   3   3    8.38    3.56
 -41   3   3    9.36    3.77
  39  -3  -3    1.73    2.99
 -39  -3   3    2.99    3.59
 -39  -3   3   -2.75    3.05
 -39   3   3   -1.10    2.71
 -39   3   3    1.52    2.98
  37  -3  -3   -1.13    2.73
 -37  -3   3   -1.85    3.19
 -37   3   3   -0.66    2.74
 -37   3   3   -3.03    2.72
  37   3  -3   -3.77    2.86
 -35  -3   3   10.43    3.53
  35  -3  -3    9.11    3.20
 -35   3   3   12.32    3.32
  35   3  -3   10.72    3.33
 -35   3   3    3.95    3.01
  33  -3  -3   30.86    3.96
 -33  -3   3   41.88    4.37
  33   3  -3   40.44    4.63
 -33   3   3   33.33    3.99
 -33   3   3   33.68    4.42
 -31  -3   3   30.82    3.89
  31  -3  -3   35.99    4.00
 -31   3   3   24.96    3.57
 -31   3   3   31.85    3.76
  31   3  -3   24.94    3.85
 -29  -3   3   -0.14    2.29
  29  -3  -3    1.16    2.50
 -29   3   3    0.67    2.14
  29   3  -3    2.66    2.41
 -29   3   3   -1.38    2.37
  29   3  -3   -0.26    2.36
  27  -3  -3   95.30    4.76
 -27  -3   3   89.99    5.19
  27   3  -3   83.88    4.99
  27   3  -3   99.18    4.76
 -27   3   3   98.52    4.85
  25  -3  -3   68.05    4.14
 -25  -3   3   62.56    4.45
 -25   3   3   69.23    4.25
  25   3  -3   69.72    4.18
  25   3  -3   71.42    4.43
  23  -3  -3   15.74    2.53
 -23  -3   3   12.47    2.51
  23  -3  -3   15.47    2.52
 -23   3   3   14.60    2.36
  23   3  -3    9.64    2.38
  23   3  -3   22.17    3.37
 -21  -3   3   79.74    4.11
  21  -3  -3   87.72    4.03
  21  -3  -3   90.68    4.08
 -21   3   3   70.22    3.90
  21   3  -3   78.28    4.15
  21   3  -3   84.59    4.25
  19  -3  -3   12.78    2.19
 -19  -3   3   14.63    2.30
  19  -3  -3   14.47    2.11
  19   3  -3   16.50    2.52
 -19   3   3   13.11    2.14
  19   3  -3   16.68    2.57
 -17  -3   3   29.60    3.15
  17  -3  -3   29.93    2.80
 -17   3   3   34.87    2.77
  17   3  -3   34.18    2.92
  17   3  -3   36.81    3.30
  15  -3  -3   81.85    3.46
 -15   3   3   84.87    3.54
  15   3  -3   78.86    3.83
  15   3  -3   87.02    3.78
  13  -3  -3   33.13    2.41
 -13  -3   3   35.21    2.06
  13   3  -3   40.54    3.11
  13   3  -3   41.66    3.13
 -13   3   3   34.68    2.41
  13   3  -3   37.76    1.13
 -11  -3   3  105.50    3.08
  11  -3  -3  105.59    3.15
  11   3  -3  101.13    2.08
  11   3  -3  107.37    3.87
  11   3  -3  101.14    2.11
 -11   3   3  105.44    3.26
   9  -3  -3    0.35    1.04
  -9  -3   3   -0.95    1.19
   9   3  -3   -0.58    0.72
  -9   3   3    0.00    1.07
   9   3  -3    0.75    1.36
   9   3  -3    0.11    1.45
   7  -3  -3  124.44    2.86
  -7  -3   3  125.17    3.76
   7   3  -3  123.30    2.62
   7   3  -3  128.53    3.84
   7   3  -3  128.49    3.68
  -7   3   3  121.50    2.94
   5  -3  -3   58.23    1.69
  -5  -3   3   66.77    2.85
   5   3  -3   62.98    2.73
   5   3  -3   58.49    2.72
  -5   3   3   62.48    1.74
   5   3  -3   62.42    2.03
   3  -3  -3   53.88    1.45
  -3  -3   3   56.05    2.99
   3  -3  -3   57.07    1.69
   3   3  -3   59.33    2.75
   3   3  -3   60.67    2.21
   3   3  -3   59.20    2.44
   3   3  -3   51.52    2.69
   1  -3  -3  668.51   11.12
  -1  -3   3  665.25   11.00
  -1  -3   3  668.28   12.73
   1  -3  -3  651.96   10.80
   1   3  -3  656.46   12.18
   1   3  -3  659.48   10.86
   1   3  -3  677.09   11.88
   1  -3   3  185.08    4.43
  -1  -3  -3  188.12    3.90
  -1  -3  -3  190.50    3.82
   1  -3   3  191.01    5.33
  -1   3  -3  196.63    4.57
   3  -3   3   38.76    2.39
  -3  -3  -3   38.72    1.96
  -3  -3  -3   39.07    1.86
   3  -3   3   37.83    3.12
  -3   3  -3   39.23    2.40
   5  -3   3  187.42    5.34
  -5  -3  -3  182.28    4.45
   5  -3   3  184.13    4.77
  -5  -3  -3  181.59    4.37
  -5   3  -3  180.72    5.00
  -5   3  -3  189.49    4.83
  -7  -3  -3  105.46    3.56
   7  -3   3  111.13    4.26
   7  -3   3  111.67    3.95
  -7  -3  -3  108.12    3.62
  -7   3  -3  116.66    4.19
  -7   3  -3  108.54    3.85
   9  -3   3   11.39    1.95
   9  -3   3    9.68    2.09
  -9  -3  -3    9.08    1.66
  -9  -3  -3    9.70    1.72
  -9   3  -3    6.88    1.82
  -9   3  -3    7.78    1.65
  11  -3   3   26.12    2.95
 -11  -3  -3   19.09    2.58
  11  -3   3   23.25    2.77
 -11  -3  -3   22.72    2.64
 -11   3  -3   18.90    2.56
 -11   3  -3   22.33    2.68
 -13  -3  -3   12.23    2.06
 -13  -3  -3   13.42    2.06
  13  -3   3    8.72    2.30
  13  -3   3   12.91    2.08
 -13   3  -3    9.20    1.92
 -13   3  -3   11.20    2.23
 -15  -3  -3    9.73    2.04
 -15  -3  -3   15.11    2.37
  15  -3   3   11.55    2.47
  15  -3   3   10.06    2.28
 -15   3  -3   11.79    2.34
 -15   3  -3   13.60    2.30
 -17  -3  -3   23.42    3.09
  17  -3   3   15.08    2.65
 -17  -3  -3   14.81    2.37
  17  -3   3   22.08    2.71
 -17   3  -3   20.69    2.74
 -17   3  -3   22.26    2.94
  19  -3   3   75.57    4.35
  19  -3   3   74.75    4.17
 -19  -3  -3   83.36    4.29
 -19  -3  -3   69.59    4.37
 -19   3  -3   75.84    4.62
 -19   3  -3   73.53    4.18
 -21  -3  -3  118.05    5.21
  21  -3   3   94.64    4.96
  21  -3   3  105.11    4.83
 -21  -3  -3  105.96    5.07
 -21   3  -3  114.89    5.34
 -21   3  -3  104.19    5.05
  23  -3   3    8.78    2.69
  23  -3   3   10.57    2.76
 -23  -3  -3   12.08    2.75
 -23  -3  -3   10.74    2.63
 -23   3  -3    9.16    2.70
 -23   3  -3   12.40    2.71
  25  -3   3   65.81    4.33
 -25  -3  -3   64.30    4.93
  25  -3   3   66.79    4.63
 -25  -3  -3   65.04    4.60
 -25   3  -3   78.03    4.89
 -25   3  -3   63.83    4.95
 -27  -3  -3   35.01    4.03
  27  -3   3   38.73    4.09
 -27  -3  -3   37.59    4.07
  27  -3   3   32.41    4.10
 -27   3  -3   41.12    4.60
 -27   3  -3   36.27    4.42
  29  -3   3   -4.39    2.51
  29  -3   3   -1.38    2.59
 -29  -3  -3   -3.33    2.57
 -29  -3  -3    2.63    2.71
 -29   3  -3   -0.06    2.65
 -29   3  -3   -1.55    2.65
 -31  -3  -3   30.22    4.12
  31  -3   3   30.20    4.06
 -31  -3  -3   27.59    4.25
  31  -3   3   35.64    3.93
 -31   3  -3   29.11    4.28
 -31   3  -3   36.43    4.88
 -33  -3  -3    5.13    3.16
 -33  -3  -3   13.67    3.69
 -33   3  -3   11.72    3.60
 -33   3  -3    4.25    3.51
 -35  -3  -3    4.48    3.58
 -35  -3  -3   -3.87    3.01
 -35   3  -3    0.68    3.41
 -35   3  -3    0.67    2.98
 -37  -3  -3    1.14    3.53
 -37  -3  -3    5.20    3.61
 -37   3  -3    4.05    3.50
 -37   3  -3    7.68    3.94
 -42  -4   3   -5.06    3.36
  42  -4  -3    5.27    3.55
 -42  -4   3   -0.10    3.22
 -42   4   3    6.02    3.42
 -42   4   3    3.71    3.55
  40  -4  -3   53.91    4.86
 -40  -4   3   56.30    5.96
 -40  -4   3   60.44    5.89
 -40   4   3   62.47    5.70
 -40   4   3   46.13    4.90
 -38  -4   3   26.19    4.35
  38  -4  -3   25.76    3.88
 -38  -4   3   30.39    4.59
 -38   4   3   27.94    4.11
 -38   4   3   39.54    4.79
  36  -4  -3   12.93    3.46
 -36  -4   3    8.77    3.59
 -36   4   3   10.76    3.44
 -36   4   3   18.06    3.64
  36   4  -3    9.96    3.46
  34  -4  -3   89.06    5.26
 -34  -4   3   82.51    5.82
  34   4  -3   78.14    5.48
 -34   4   3   82.01    5.46
 -34   4   3   82.02    5.51
 -32  -4   3   12.80    3.57
  32  -4  -3   17.87    3.49
 -32   4   3   18.06    3.41
 -32   4   3   11.63    3.08
  32   4  -3   11.81    3.24
 -30  -4   3   12.88    3.13
  30  -4  -3   14.11    3.20
 -30   4   3   12.71    2.97
 -30   4   3   14.75    3.11
  30   4  -3   16.94    3.52
  28  -4  -3   14.77    3.15
 -28  -4   3   11.72    3.11
 -28   4   3   12.54    2.70
  28   4  -3   12.73    2.96
  28   4  -3    7.50    2.78
 -28   4   3    8.81    2.53
  26  -4  -3   -0.17    2.28
 -26  -4   3   -0.01    2.46
 -26   4   3    5.18    2.36
  26   4  -3    0.57    2.21
 -26   4   3    1.40    2.18
  26   4  -3    1.16    2.43
 -24  -4   3    3.39    2.26
  24  -4  -3    1.95    2.19
  24   4  -3    0.75    2.30
  24   4  -3    4.94    2.27
 -24   4   3   -0.50    2.00
 -24   4   3    2.95    2.11
  22  -4  -3    1.12    2.01
 -22  -4   3    0.84    1.96
 -22   4   3    1.00    1.92
  22   4  -3    1.32    2.15
  22   4  -3    1.38    2.32
 -20  -4   3   32.43    3.46
  20  -4  -3   26.72    3.12
 -20   4   3   27.93    2.85
  20   4  -3   28.60    3.31
  20   4  -3   24.29    3.39
 -18  -4   3   56.80    3.52
  18   4  -3   50.91    3.39
 -18   4   3   52.63    3.13
  18   4  -3   52.27    3.97
 -16  -4   3    4.00    1.18
 -16   4   3    4.53    1.68
  16   4  -3    3.40    2.20
  16   4  -3    2.03    1.88
  14  -4  -3  253.59    5.69
 -14  -4   3  246.14    5.39
  14   4  -3  238.94    7.17
 -14   4   3  245.54    5.91
  14   4  -3  243.84    6.49
 -12  -4   3  133.89    3.66
  12  -4  -3  126.75    3.53
  12   4  -3  128.98    5.01
 -12   4   3  130.44    3.83
  12   4  -3  141.44    4.46
 -10  -4   3   68.00    2.83
  10  -4  -3   63.43    2.26
  10   4  -3   66.84    3.24
 -10   4   3   70.01    2.63
  10   4  -3   68.04    3.82
  -8  -4   3  249.91    5.86
   8   4  -3  257.27    5.82
  -8   4   3  254.78    5.17
   8   4  -3  249.79    6.09
  -6  -4   3   26.15    2.50
   6   4  -3   27.44    2.25
  -6   4   3   27.80    1.67
   6   4  -3   23.56    2.28
  -4  -4   3    6.24    1.68
   4   4  -3    6.55    1.06
   4   4  -3    4.81    1.39
  -4   4   3    4.82    0.93
   4   4  -3    5.66    1.33
  -2  -4   3   51.29    2.95
   2   4  -3   50.88    2.41
   2   4  -3   48.07    2.18
   2   4  -3   50.71    2.99
   2   4  -3   52.93    2.61
   0  -4  -3    7.45    0.75
   0  -4   3    7.34    1.59
   0  -4   3    7.88    1.98
   0   4  -3    8.78    1.78
   0   4  -3    8.57    1.43
   0   4  -3    8.50    1.40
  -2  -4  -3   62.80    2.07
   2  -4   3   66.15    3.06
  -2  -4  -3   66.31    2.32
   2  -4   3   73.35    3.58
  -2   4  -3   66.88    2.90
  -2   4  -3   65.97    2.68
  -2   4  -3   64.73    3.33
  -4  -4  -3   14.61    1.58
   4  -4   3   15.91    2.02
   4  -4   3   14.92    2.25
  -4  -4  -3   14.89    1.82
  -4   4  -3   12.51    2.02
  -4   4  -3   15.16    2.03
   6  -4   3  296.56    6.56
  -6  -4  -3  293.56    6.34
   6  -4   3  295.08    7.62
  -6  -4  -3  297.16    6.28
  -6   4  -3  294.68    6.78
  -6   4  -3  301.64    7.13
   8  -4   3  232.76    6.76
   8  -4   3  235.23    5.82
  -8  -4  -3  231.68    5.61
  -8  -4  -3  231.88    5.66
  -8   4  -3  229.86    5.90
  -8   4  -3  234.99    6.39
 -10  -4  -3   10.01    1.78
 -10  -4  -3    8.93    1.69
  10  -4   3    7.61    2.21
  10  -4   3    5.97    2.06
 -10   4  -3    7.15    1.74
 -10   4  -3    7.00    1.98
  12  -4   3  132.60    5.47
  12  -4   3  123.05    4.42
 -12  -4  -3  138.49    4.69
 -12  -4  -3  142.34    4.66
 -12   4  -3  131.00    4.71
 -12   4  -3  128.28    4.98
  14  -4   3   71.97    3.97
  14  -4   3   58.72    4.25
 -14  -4  -3   63.20    3.59
 -14  -4  -3   69.84    3.67
 -14   4  -3   74.19    4.10
 -14   4  -3   64.13    3.69
  16  -4   3    0.12    2.14
 -16  -4  -3   -1.19    1.87
 -16  -4  -3    0.66    1.82
  16  -4   3    3.75    2.20
 -16   4  -3    1.87    1.93
 -16   4  -3    0.68    1.82
  18  -4   3   31.95    3.52
 -18  -4  -3   31.45    3.42
  18  -4   3   42.33    3.82
 -18  -4  -3   32.89    3.46
 -18   4  -3   32.57    3.44
 -18   4  -3   29.89    3.29
 -20  -4  -3   22.29    3.18
  20  -4   3   21.77    3.32
 -20  -4  -3   27.48    3.22
  20  -4   3   23.21    3.20
 -20   4  -3   26.83    3.71
 -20   4  -3   21.66    3.05
  22  -4   3   -2.72    2.25
 -22  -4  -3    2.26    2.55
  22  -4   3    0.80    2.29
 -22  -4  -3    1.94    2.33
 -22   4  -3    3.90    2.43
 -22   4  -3    2.58    2.59
 -24  -4  -3   -1.77    2.52
 -24  -4  -3   -0.39    2.23
  24  -4   3   -3.80    2.35
  24  -4   3    1.12    2.40
 -24   4  -3    2.94    2.29
 -24   4  -3    0.48    2.58
 -26  -4  -3   25.73    3.72
 -26  -4  -3   24.11    3.65
  26  -4   3   18.36    3.29
  26  -4   3   27.05    4.02
 -26   4  -3   22.33    3.72
 -26   4  -3   21.00    3.49
  28  -4   3   39.77    4.40
  28  -4   3   29.23    3.73
 -28  -4  -3   38.34    4.16
 -28  -4  -3   30.72    4.22
 -28   4  -3   30.72    4.00
 -28   4  -3   35.35    4.58
  30  -4   3    8.86    3.15
  30  -4   3    9.15    3.27
 -30  -4  -3    6.86    3.30
 -30  -4  -3   10.89    3.35
 -30   4  -3   15.33    3.75
 -30   4  -3    9.20    3.26
 -32  -4  -3   42.27    5.04
  32  -4   3   41.87    4.68
  32  -4   3   38.16    4.47
 -32  -4  -3   39.81    4.55
 -32   4  -3   45.81    4.81
 -32   4  -3   34.54    4.77
 -34  -4  -3   68.00    5.85
 -34  -4  -3   65.05    5.72
 -34   4  -3   56.76    5.59
 -34   4  -3   57.36    5.77
 -36  -4  -3    0.00    3.27
 -36  -4  -3   -0.04    3.42
 -36   4  -3    2.12    3.03
 -36   4  -3   -2.15    3.41
 -41  -5   3   12.47    3.74
  41  -5  -3   14.00    3.84
 -41  -5   3   10.02    4.23
 -41   5   3    9.91    3.34
 -41   5   3    4.14    3.62
 -39  -5   3   14.67    3.97
 -39  -5   3   16.23    4.34
  39  -5  -3   18.02    3.87
  39  -5  -3   21.17    4.16
 -39   5   3   14.93    3.73
 -39   5   3   10.18    3.64
 -37  -5   3    0.59    3.42
  37  -5  -3    5.67    3.40
 -37   5   3    1.20    2.98
  37   5  -3   -0.72    2.93
 -37   5   3    5.51    3.11
 -35  -5   3    2.28    3.04
  35  -5  -3    6.68    3.37
 -35   5   3    6.35    2.98
 -35   5   3    9.05    3.22
  35   5  -3    3.82    3.02
  33  -5  -3   34.81    4.26
 -33  -5   3   32.21    4.64
 -33   5   3   41.30    4.40
 -33   5   3   34.22    4.20
  33   5  -3   34.59    4.22
 -31  -5   3   18.69    3.73
  31  -5  -3   14.85    3.52
  31   5  -3   12.77    3.18
 -31   5   3   19.13    3.41
 -31   5   3   22.44    3.54
 -29  -5   3    6.76    2.74
  29  -5  -3    0.97    2.87
 -29   5   3    4.10    2.58
 -29   5   3    2.04    2.36
  29   5  -3    5.89    2.83
  29   5  -3   -1.00    2.65
 -27  -5   3   42.99    4.10
  27  -5  -3   47.04    4.30
 -27   5   3   51.31    4.12
  27   5  -3   48.80    4.43
 -27   5   3   42.41    3.89
  27   5  -3   51.23    4.28
 -25  -5   3   19.77    3.35
  25  -5  -3   26.06    3.48
  25   5  -3   17.97    3.01
 -25   5   3   25.29    3.31
 -25   5   3   19.80    2.88
  25   5  -3   30.03    4.11
 -23  -5   3   10.77    2.79
  23  -5  -3   12.51    2.64
  23   5  -3    6.46    2.39
 -23   5   3    8.69    2.29
 -23   5   3    7.84    2.37
  23   5  -3   11.30    2.99
  21  -5  -3  133.37    5.06
 -21  -5   3  133.81    5.46
  21   5  -3  139.50    6.13
 -21   5   3  139.18    5.22
 -21   5   3  127.89    5.09
  21   5  -3  136.97    5.61
  19  -5  -3   44.84    3.24
 -19  -5   3   51.54    3.62
 -19   5   3   43.74    3.13
  19   5  -3   49.12    3.75
 -19   5   3   46.93    3.16
  19   5  -3   51.97    3.92
 -17  -5   3    9.95    1.35
  17   5  -3   11.58    2.33
  17   5  -3   10.91    2.52
 -17   5   3   11.58    1.90
 -17   5   3   11.72    1.91
 -15  -5   3   51.27    2.46
 -15   5   3   55.15    2.88
  15   5  -3   50.60    4.18
  15   5  -3   56.92    3.47
 -15   5   3   46.36    2.84
 -13  -5   3   38.37    2.38
 -13   5   3   34.68    2.28
 -13   5   3   37.85    2.48
  13   5  -3   33.77    2.87
  13   5  -3   34.00    3.40
 -11  -5   3   58.10    2.95
  11   5  -3   60.65    3.97
  11   5  -3   52.24    3.11
 -11   5   3   56.73    2.48
 -11   5   3   54.85    2.54
  -9  -5   3    0.40    1.53
  -9   5   3    3.68    0.97
   9   5  -3    2.26    1.58
   9   5  -3    0.47    2.04
  -9   5   3    4.34    1.24
  -7  -5   3  144.57    4.58
   7   5  -3  149.55    5.45
   7   5  -3  146.06    4.43
   7   5  -3  152.20    4.12
  -7   5   3  144.92    3.66
  -7   5   3  146.34    3.07
  -5  -5   3   96.53    3.86
  -5   5   3   90.12    2.67
   5   5  -3   89.82    3.39
   5   5  -3   92.04    3.09
   5   5  -3   92.20    4.67
  -3  -5   3   -0.16    1.61
   3   5  -3    1.27    1.30
   3   5  -3   -0.44    1.14
  -1  -5   3  105.02    4.41
   1   5  -3  103.71    3.22
   1   5  -3  106.05    3.49
   1   5  -3  106.73    4.10
   1  -5   3   76.29    3.28
   1  -5   3   75.12    3.82
  -1  -5  -3   73.88    1.85
  -1   5  -3   75.49    3.38
  -1   5  -3   77.86    2.85
   3  -5   3   19.08    2.17
   3  -5   3   18.34    2.73
  -3  -5  -3   23.82    1.52
  -3  -5  -3   23.51    1.89
  -3   5  -3   24.64    2.19
  -3   5  -3   20.44    2.37
  -5  -5  -3   85.94    2.73
   5  -5   3   89.12    4.22
   5  -5   3   83.52    3.72
  -5  -5  -3   89.34    3.10
  -5   5  -3   88.21    3.36
  -5   5  -3   85.05    3.88
  -7  -5  -3   89.20    3.01
   7  -5   3   91.12    3.93
  -7  -5  -3   83.05    3.15
   7  -5   3   78.52    4.25
  -7   5  -3   78.21    3.90
  -7   5  -3   84.23    3.35
   9  -5   3   16.34    2.25
  -9  -5  -3   14.74    1.95
   9  -5   3   12.52    2.50
  -9  -5  -3   15.77    2.20
  -9   5  -3   12.87    2.26
  -9   5  -3   12.25    1.86
 -11  -5  -3   17.63    2.13
 -11  -5  -3   20.37    1.22
 -11  -5  -3   19.92    2.53
  11  -5   3   12.86    2.59
  11  -5   3   21.07    2.54
 -11   5  -3   15.46    2.10
 -11   5  -3   13.19    2.45
  13  -5   3   35.38    3.62
  13  -5   3   29.35    3.41
 -13  -5  -3   30.51    2.74
 -13  -5  -3   31.05    3.05
 -13   5  -3   35.42    3.34
 -13   5  -3   28.03    2.85
  15  -5   3   18.76    2.87
 -15  -5  -3   18.44    2.52
 -15  -5  -3   19.86    2.76
  15  -5   3   14.78    2.92
 -15   5  -3   15.72    2.52
 -15   5  -3   15.33    2.29
  17  -5   3    3.35    2.45
  17  -5   3   -0.96    2.46
 -17  -5  -3    1.58    1.93
 -17  -5  -3    4.16    2.14
 -17   5  -3    1.66    2.08
 -17   5  -3    5.86    2.15
 -19  -5  -3   67.93    4.22
  19  -5   3   83.10    4.80
 -19  -5  -3   66.23    4.36
  19  -5   3   78.51    4.85
 -19   5  -3   81.98    4.49
 -19   5  -3   71.12    4.73
  21  -5   3   39.81    4.30
 -21  -5  -3   44.60    4.02
 -21  -5  -3   45.67    4.04
  21  -5   3   42.64    4.51
 -21   5  -3   44.36    3.71
 -21   5  -3   36.71    3.78
 -23  -5  -3    0.99    2.52
 -23  -5  -3    0.10    2.33
  23  -5   3   -2.57    2.77
  23  -5   3    1.40    2.50
 -23   5  -3    4.62    2.35
 -23   5  -3    3.83    2.54
 -25  -5  -3   54.04    4.57
  25  -5   3   53.70    4.65
 -25  -5  -3   59.11    4.78
  25  -5   3   50.21    4.80
 -25   5  -3   58.66    4.95
 -25   5  -3   59.99    4.74
 -27  -5  -3   48.99    4.83
  27  -5   3   60.85    5.08
 -27  -5  -3   52.37    4.77
  27  -5   3   59.89    4.86
 -27   5  -3   46.77    4.88
 -27   5  -3   50.91    4.41
 -29  -5  -3    1.83    2.64
  29  -5   3   -0.44    2.88
 -29  -5  -3   -1.73    2.83
  29  -5   3   -2.12    2.86
 -29   5  -3    3.34    3.09
 -29   5  -3    1.05    2.87
 -31  -5  -3   21.71    4.13
  31  -5   3   22.02    4.05
  31  -5   3   19.32    3.85
 -31  -5  -3   20.59    3.89
 -31   5  -3   21.58    3.93
 -31   5  -3   16.57    3.78
 -33  -5  -3   14.94    4.01
 -33  -5  -3   13.18    3.77
  33  -5   3   25.77    4.02
  33  -5   3   20.51    4.14
 -33   5  -3   27.75    4.33
 -33   5  -3   17.02    4.16
  35  -5   3    2.53    3.46
 -35  -5  -3    7.14    3.54
 -35  -5  -3    0.04    3.36
 -35   5  -3    7.24    3.81
 -35   5  -3   -1.19    3.14
 -40  -6   3   18.54    4.27
  40  -6  -3    7.02    3.88
  40  -6  -3   22.47    4.43
 -40  -6   3   13.45    4.08
 -40   6   3    9.27    3.60
 -40   6   3   10.69    3.65
  38  -6  -3    5.56    3.68
  38  -6  -3    3.78    3.37
 -38  -6   3    2.59    3.27
 -38  -6   3    1.66    3.51
 -38   6   3    5.91    3.32
 -38   6   3    0.17    2.93
 -36  -6   3    3.66    3.47
  36  -6  -3    0.80    3.36
  36   6  -3    6.98    3.36
 -36   6   3    4.20    3.10
 -36   6   3    7.37    3.13
  34  -6  -3   31.72    4.18
 -34  -6   3   33.41    4.46
  34   6  -3   32.12    4.30
 -34   6   3   35.90    4.41
 -34   6   3   21.42    3.61
 -32  -6   3   29.90    4.26
  32  -6  -3   24.91    4.01
 -32   6   3   26.20    3.72
 -32   6   3   28.08    3.90
  32   6  -3   30.56    4.11
 -30  -6   3    3.03    2.69
  30   6  -3    0.24    2.78
 -30   6   3    0.65    2.35
 -30   6   3   -0.45    2.55
 -28  -6   3   35.57    4.40
  28   6  -3   52.66    4.77
  28   6  -3   40.17    4.50
 -28   6   3   45.60    4.07
 -28   6   3   46.63    4.27
 -26  -6   3   31.29    3.79
  26   6  -3   27.04    3.61
 -26   6   3   26.38    3.47
 -26   6   3   36.19    3.60
  26   6  -3   29.16    3.87
 -24  -6   3   10.70    2.98
  24   6  -3   15.47    3.53
 -24   6   3   13.28    2.63
  24   6  -3   12.74    2.77
 -24   6   3   17.06    2.62
 -22  -6   3   14.50    2.86
 -22   6   3   18.12    2.55
 -22   6   3   17.32    2.60
  22   6  -3   17.71    3.30
  22   6  -3   12.27    2.62
 -20  -6   3   51.90    4.13
  20   6  -3   52.47    4.35
 -20   6   3   44.00    3.48
  20   6  -3   52.03    3.95
 -20   6   3   51.40    3.48
  18   6  -3    1.94    2.69
  18   6  -3    4.68    2.18
 -18   6   3    3.82    1.79
 -18   6   3    5.90    1.94
 -16  -6   3    8.44    1.57
  16   6  -3    6.62    2.61
  16   6  -3   10.16    2.22
 -16   6   3    6.78    1.66
 -16   6   3    9.36    1.88
 -14  -6   3   63.51    2.96
  14   6  -3   66.37    4.37
 -14   6   3   63.41    3.10
  14   6  -3   64.46    3.56
 -14   6   3   58.54    2.79
 -12  -6   3   48.07    2.92
 -12   6   3   45.85    2.69
  12   6  -3   44.47    3.22
 -12   6   3   47.25    2.22
  12   6  -3   52.02    4.34
 -10  -6   3    5.28    1.74
  10   6  -3    2.43    2.11
 -10   6   3    2.62    0.97
 -10   6   3    2.31    1.33
  10   6  -3    4.22    1.65
  -8  -6   3   21.31    2.56
   8   6  -3   23.48    3.28
  -8   6   3   18.03    1.88
  -8   6   3   19.43    1.13
   8   6  -3   19.00    2.38
  -6  -6   3   33.21    2.92
  -6   6   3   32.93    2.08
   6   6  -3   33.76    3.77
   6   6  -3   29.57    2.55
   6   6  -3   36.92    2.27
  -4  -6   3    1.69    1.79
   4   6  -3    0.10    1.15
   4   6  -3   -0.65    1.98
   4   6  -3    0.68    1.37
  -2  -6   3    8.63    2.18
   2   6  -3    7.82    1.52
   2   6  -3    6.13    2.33
   2   6  -3    6.93    1.35
   0  -6   3   31.40    3.42
   0   6  -3   31.17    2.17
   0   6  -3   37.75    3.22
   0   6  -3   31.82    2.17
   0   6  -3   30.25    2.88
   2  -6   3   21.89    2.81
   2  -6   3   21.17    2.30
  -2   6  -3   26.16    2.07
  -2   6  -3   23.61    3.15
  -2   6  -3   22.90    2.08
  -2   6  -3   18.45    2.32
   4  -6   3   -0.88    2.05
   4  -6   3    3.90    1.79
  -4  -6  -3   -1.12    1.09
  -4  -6  -3    3.05    0.91
  -4   6  -3    1.87    1.95
  -4   6  -3    1.08    1.74
  -4   6  -3   -1.58    1.20
  -6  -6  -3  119.53    3.38
   6  -6   3  129.18    5.57
   6  -6   3  116.11    4.49
  -6  -6  -3  120.25    3.88
  -6   6  -3  125.87    4.80
  -6   6  -3  132.10    4.11
  -6   6  -3  123.53    4.85
  -8  -6  -3   49.44    2.76
  -8  -6  -3   51.56    2.55
   8  -6   3   51.41    3.96
   8  -6   3   55.56    3.37
  -8   6  -3   50.80    3.00
  -8   6  -3   53.79    3.51
  -8   6  -3   42.15    3.46
  10  -6   3   -1.71    2.13
  10  -6   3    2.74    2.01
 -10  -6  -3    1.89    1.40
 -10  -6  -3   -1.31    1.12
 -10  -6  -3    0.95    1.04
 -10   6  -3    0.81    1.44
 -10   6  -3   -1.23    1.63
 -10   6  -3    4.05    2.09
 -12  -6  -3   44.62    2.89
  12  -6   3   57.83    4.62
  12  -6   3   59.01    4.09
 -12  -6  -3   58.65    3.27
 -12   6  -3   48.73    3.17
 -12   6  -3   51.45    3.23
 -12   6  -3   44.61    3.65
 -14  -6  -3   36.09    3.09
 -14  -6  -3   42.07    3.10
  14  -6   3   38.70    3.64
  14  -6   3   38.18    4.37
 -14   6  -3   34.69    3.30
 -14   6  -3   33.59    2.96
 -14   6  -3   41.53    3.75
 -16  -6  -3   -2.60    1.81
  16  -6   3   -0.77    2.47
 -16  -6  -3    0.74    1.82
  16  -6   3    4.47    2.70
 -16   6  -3   -0.55    2.22
 -16   6  -3   -2.99    1.90
 -18  -6  -3   24.69    3.30
  18  -6   3   30.37    3.76
  18  -6   3   28.42    3.92
 -18  -6  -3   30.12    3.25
 -18   6  -3   28.79    3.72
 -18   6  -3   34.10    3.46
  20  -6   3   36.82    4.48
 -20  -6  -3   43.54    4.15
  20  -6   3   32.73    4.13
 -20  -6  -3   38.19    3.97
 -20   6  -3   35.37    3.74
 -20   6  -3   36.63    3.77
  22  -6   3    8.16    2.98
  22  -6   3    2.47    3.00
 -22  -6  -3   11.08    2.96
 -22  -6  -3    5.76    2.47
 -22   6  -3    7.31    2.87
 -22   6  -3    1.07    2.37
  24  -6   3   -5.44    2.89
  24  -6   3    2.66    2.75
 -24  -6  -3    4.24    2.83
 -24  -6  -3   -1.12    2.40
 -24   6  -3    2.25    2.86
 -24   6  -3    5.91    2.64
  26  -6   3   35.43    4.32
 -26  -6  -3   36.67    4.29
  26  -6   3   32.20    4.19
 -26  -6  -3   37.20    4.43
 -26   6  -3   36.69    4.64
 -26   6  -3   41.22    4.43
  28  -6   3   12.53    3.34
 -28  -6  -3   10.31    3.17
  28  -6   3   11.01    3.67
 -28  -6  -3    5.99    3.37
 -28   6  -3   14.23    3.33
 -28   6  -3   13.31    3.67
 -30  -6  -3    0.77    3.12
 -30  -6  -3    1.29    2.87
  30  -6   3    3.91    3.48
  30  -6   3   -1.52    3.18
 -30   6  -3    0.99    2.91
 -30   6  -3    9.18    3.63
  32  -6   3   10.55    3.69
 -32  -6  -3   14.04    4.03
  32  -6   3   15.58    4.22
 -32  -6  -3   22.30    4.08
 -32   6  -3   26.48    4.62
 -32   6  -3   16.46    3.84
 -34  -6  -3    4.18    3.46
  34  -6   3    2.74    3.49
  34  -6   3    9.57    3.92
 -34  -6  -3   16.66    4.12
 -34   6  -3   11.17    4.07
 -34   6  -3   -0.50    3.18
 -37  -7   3    0.86    3.53
  37  -7  -3    5.25    3.55
 -37  -7   3   -3.08    3.03
 -37   7   3   11.72    3.50
  35  -7  -3    9.38    3.64
 -35  -7   3    7.89    3.71
 -35   7   3    6.48    3.23
  35   7  -3    8.75    3.62
 -33  -7   3   15.69    3.86
 -33   7   3   15.42    3.54
  33   7  -3   12.12    3.68
 -31  -7   3    7.30    3.37
  31   7  -3    0.67    2.84
 -31   7   3    3.95    2.76
 -31   7   3    4.20    2.48
 -29  -7   3    6.20    3.25
 -29   7   3    3.50    2.44
  29   7  -3    3.55    2.91
 -29   7   3   -0.21    2.41
 -27  -7   3   41.27    4.57
 -27   7   3   49.19    4.15
  27   7  -3   35.29    4.73
 -27   7   3   42.82    4.17
  27   7  -3   48.46    4.59
 -25  -7   3   13.04    3.00
  25   7  -3   11.83    3.55
 -25   7   3   17.88    2.70
 -25   7   3   13.28    2.88
  25   7  -3   19.47    3.35
 -23  -7   3    2.50    2.47
  23   7  -3    2.35    3.06
  23   7  -3    1.97    2.56
 -23   7   3    4.97    2.17
 -23   7   3    1.66    2.10
 -21  -7   3    2.75    2.53
  21   7  -3    5.98    2.42
 -21   7   3    2.56    2.08
  21   7  -3    3.53    3.04
 -21   7   3    2.13    1.85
 -19   7   3   21.35    2.75
  19   7  -3   19.45    2.91
 -19   7   3   20.96    2.63
  19   7  -3   18.60    3.42
 -17   7   3    2.67    1.57
  17   7  -3   -1.36    2.78
 -17   7   3   -0.77    1.73
  17   7  -3    0.69    2.14
 -15  -7   3   52.41    3.00
  15   7  -3   56.52    3.61
 -15   7   3   56.35    2.78
 -15   7   3   52.25    3.14
  15   7  -3   54.11    4.41
 -13  -7   3   86.06    3.76
 -13   7   3   83.09    3.60
  13   7  -3   86.19    3.95
  13   7  -3   85.84    5.05
 -13   7   3   82.31    2.89
 -11  -7   3    4.73    1.87
  11   7  -3    8.33    2.56
 -11   7   3    2.46    1.53
  11   7  -3    5.94    1.86
  -9  -7   3   45.25    3.45
  -9   7   3   48.91    2.63
   9   7  -3   44.38    4.34
   9   7  -3   51.53    3.11
  -7  -7   3   93.29    4.35
  -7   7   3   94.01    3.17
   7   7  -3   83.60    3.49
   7   7  -3   89.35    5.13
  -5  -7   3   -0.96    1.93
   5   7  -3   -0.38    1.37
   5   7  -3   -0.75    1.14
   5   7  -3    1.90    2.33
  -3  -7   3   -0.27    2.05
   3   7  -3    0.04    1.12
   3   7  -3   -0.36    1.29
   3   7  -3   -1.09    2.17
  -1  -7   3   17.50    2.76
   1   7  -3   18.03    2.12
   1   7  -3   20.44    3.04
   1   7  -3   21.30    1.99
   1  -7   3   38.09    3.84
  -1   7  -3   40.98    3.84
  -1   7  -3   44.40    2.34
  -1   7  -3   38.15    3.16
  -1   7  -3   45.79    2.52
   3  -7   3    6.33    2.31
  -3   7  -3    7.24    2.09
  -3   7  -3    6.45    1.46
  -3   7  -3    6.29    2.36
  -3   7  -3    6.80    1.48
   5  -7   3   23.57    3.37
  -5  -7  -3   27.86    2.37
  -5   7  -3   21.26    2.84
  -5   7  -3   28.35    2.37
  -5   7  -3   22.22    2.93
  -7  -7  -3   40.58    2.63
   7  -7   3   42.03    3.88
  -7   7  -3   35.74    3.26
  -7   7  -3   34.08    3.30
  -7   7  -3   34.55    2.62
  -9  -7  -3   20.27    2.40
   9  -7   3   24.12    3.55
  -9   7  -3   17.37    2.68
  -9   7  -3   17.26    2.13
  -9   7  -3   22.31    3.05
 -11  -7  -3    5.39    1.78
 -11  -7  -3    3.84    1.48
  11  -7   3   -0.11    2.44
 -11   7  -3    7.59    2.04
 -11   7  -3   10.44    2.04
 -11   7  -3    6.83    2.36
 -13  -7  -3    4.24    1.96
  13  -7   3    5.08    2.78
 -13  -7  -3    2.12    1.57
 -13   7  -3    5.88    1.98
 -13   7  -3    2.47    2.36
 -13   7  -3    3.94    1.91
 -15  -7  -3    8.46    2.33
  15  -7   3    7.13    2.92
 -15  -7  -3    7.65    1.92
 -15   7  -3    8.51    2.42
 -15   7  -3    6.26    2.07
 -17  -7  -3    7.08    2.15
 -17  -7  -3    5.87    2.36
  17  -7   3    6.18    3.19
 -17   7  -3    9.66    2.88
 -17   7  -3    4.42    2.18
 -19  -7  -3   51.25    4.24
  19  -7   3   44.58    4.95
 -19  -7  -3   44.96    3.85
 -19   7  -3   51.80    3.92
 -19   7  -3   45.33    4.34
 -21  -7  -3    3.48    2.55
 -21  -7  -3    2.45    2.38
  21  -7   3    0.44    3.09
 -21   7  -3    3.86    2.57
 -21   7  -3    1.12    2.26
  23  -7   3    0.58    2.87
 -23  -7  -3   -1.13    2.31
 -23  -7  -3    4.08    2.76
 -23   7  -3   -2.68    2.56
 -23   7  -3    0.52    2.32
  25  -7   3    1.35    3.22
 -25  -7  -3    2.76    2.95
 -25  -7  -3    4.94    2.66
 -25   7  -3    2.48    2.54
 -25   7  -3    1.94    2.90
 -27  -7  -3   33.18    4.26
  27  -7   3   30.26    4.39
  27  -7   3   32.15    4.79
 -27  -7  -3   31.81    4.48
 -27   7  -3   30.78    4.19
 -27   7  -3   32.10    4.44
  29  -7   3    0.85    3.45
 -29  -7  -3   -0.53    2.80
 -29  -7  -3    2.98    3.27
  29  -7   3    6.54    3.71
 -29   7  -3    3.30    2.96
 -29   7  -3    5.64    3.36
  31  -7   3    5.03    3.63
  31  -7   3    4.41    3.74
 -31  -7  -3    8.97    3.68
 -31   7  -3    3.52    3.09
 -31   7  -3    3.67    3.45
  33  -7   3   13.28    4.31
  33  -7   3   14.51    4.19
 -33  -7  -3   18.23    4.17
 -33   7  -3   25.07    4.21
 -33   7  -3   12.71    3.90
 -36  -8   3    4.40    3.36
  36  -8  -3   -0.22    3.52
  34  -8  -3    7.01    3.84
 -34  -8   3    3.20    3.46
  34   8  -3    1.97    2.95
 -32  -8   3   24.02    4.34
  32   8  -3   28.06    4.25
 -32   8   3   25.02    3.84
 -30  -8   3    2.49    3.16
 -30   8   3    2.12    2.76
  30   8  -3    2.14    2.93
 -28  -8   3   19.72    3.75
 -28   8   3   15.46    3.07
  28   8  -3   17.37    3.53
 -26  -8   3   34.82    4.50
  26   8  -3   49.85    4.86
 -26   8   3   44.61    3.91
  26   8  -3   45.81    4.44
 -24  -8   3   -0.17    2.67
  24   8  -3    5.21    2.68
  24   8  -3    2.58    3.21
 -24   8   3    3.15    2.31
 -22  -8   3   14.52    3.23
 -22   8   3   13.66    2.72
  22   8  -3   15.07    3.01
  22   8  -3   11.71    3.49
 -20  -8   3   20.71    3.38
 -20   8   3   22.30    3.11
  20   8  -3   17.95    3.02
  20   8  -3   17.63    3.93
  18   8  -3   32.56    3.39
 -18   8   3   23.78    3.00
  18   8  -3   30.20    4.30
  16   8  -3   38.02    4.73
  16   8  -3   33.38    3.48
 -16   8   3   34.91    3.25
  14   8  -3    5.82    2.11
 -14   8   3    2.71    1.79
  14   8  -3    1.86    2.80
 -12  -8   3    0.20    2.10
  12   8  -3   -2.35    1.73
 -12   8   3   -1.88    1.56
  12   8  -3    1.65    2.89
 -10  -8   3   16.97    2.62
  10   8  -3   15.26    2.31
  10   8  -3   12.11    3.05
 -10   8   3   16.61    2.35
  -8  -8   3    5.83    2.36
  -8   8   3    7.83    1.69
   8   8  -3    4.78    1.84
   8   8  -3    2.26    2.51
  -6  -8   3   74.95    4.32
   6   8  -3   75.93    3.36
   6   8  -3   71.44    5.14
  -4  -8   3   18.30    2.95
   4   8  -3   19.59    2.27
   4   8  -3   20.13    2.01
   4   8  -3   15.92    3.03
  -2  -8   3   62.93    4.43
   2   8  -3   56.04    2.95
   2   8  -3   55.75    4.22
   0  -8   3  175.85    6.71
   0   8  -3  181.24    4.80
   0   8  -3  167.96    6.66
   2  -8   3    2.54    2.59
  -2   8  -3    5.89    2.12
  -2   8  -3    6.88    1.57
  -2   8  -3   -0.16    2.34
  -2   8  -3    4.96    1.40
   4  -8   3   98.09    5.20
  -4   8  -3  101.51    4.72
  -4   8  -3   99.57    3.53
  -4   8  -3   99.65    5.05
   6  -8   3   30.29    3.84
  -6  -8  -3   31.20    3.05
  -6  -8  -3   27.33    2.58
  -6   8  -3   31.28    3.84
  -6   8  -3   25.93    3.26
  -6   8  -3   25.82    2.40
  -8  -8  -3    2.98    1.71
   8  -8   3    0.17    2.73
  -8   8  -3   -2.42    1.93
  -8   8  -3   -0.27    2.05
  -8   8  -3    1.97    1.55
 -10  -8  -3   -1.14    1.61
  10  -8   3   -3.58    2.66
 -10   8  -3   -0.99    2.04
 -10   8  -3    1.47    2.27
 -10   8  -3    1.55    1.63
 -12  -8  -3    4.11    1.88
  12  -8   3   -0.50    2.71
 -12   8  -3    2.53    1.80
 -12   8  -3   -0.11    2.24
 -14  -8  -3   19.21    2.72
  14  -8   3   14.72    3.50
 -14   8  -3   20.90    2.64
 -14   8  -3   20.83    3.26
  16  -8   3   13.20    3.36
 -16  -8  -3   10.44    2.56
 -16   8  -3   11.67    2.41
 -16   8  -3    9.94    2.93
  18  -8   3   16.14    3.63
 -18  -8  -3   16.45    2.86
 -18   8  -3   11.32    2.63
 -18   8  -3   11.07    3.07
  20  -8   3   44.95    5.17
 -20  -8  -3   61.22    4.44
 -20   8  -3   61.81    4.40
 -20   8  -3   57.82    4.75
 -22  -8  -3    8.43    2.94
  22  -8   3    8.93    3.47
 -22   8  -3    9.98    3.24
  24  -8   3   15.95    4.01
 -24  -8  -3   15.16    3.59
 -24   8  -3    9.67    3.40
 -26  -8  -3   22.48    3.90
  26  -8   3   13.89    3.92
 -26   8  -3   20.15    3.94
  28  -8   3    0.13    3.51
 -28  -8  -3   -1.80    3.02
 -28   8  -3   -1.07    3.01
  30  -8   3    7.75    3.86
 -30  -8  -3    3.42    3.46
 -30   8  -3   11.97    4.03
  33  -9  -3    3.43    3.65
 -33  -9   3    5.29    3.61
  33   9  -3   14.63    3.75
 -31  -9   3   11.26    3.82
  31  -9  -3   11.89    4.09
  31   9  -3   11.21    3.58
  29  -9  -3    6.06    3.53
 -29  -9   3    4.01    3.30
  29   9  -3    4.34    3.01
 -27  -9   3    2.79    3.08
  27   9  -3   -0.82    2.74
 -25  -9   3    1.07    2.97
  25   9  -3    2.58    3.48
  25   9  -3   -3.58    2.57
 -23  -9   3    4.72    2.97
  23   9  -3   -1.49    2.56
  23   9  -3    4.48    3.18
 -21  -9   3    0.69    2.63
  21   9  -3    4.03    3.14
  21   9  -3    3.23    2.40
  19   9  -3   18.61    4.07
  19   9  -3   11.71    2.84
  17   9  -3    2.31    2.09
  17   9  -3    3.24    3.33
  15   9  -3   23.61    4.01
  15   9  -3   26.17    3.21
  13   9  -3   26.38    4.07
 -11  -9   3    3.86    2.38
  11   9  -3   -0.05    2.75
  -9  -9   3   11.19    2.78
   9   9  -3    2.91    3.12
  -7  -9   3   38.11    4.03
   7   9  -3   32.52    4.57
  -5  -9   3   -2.61    2.30
   5   9  -3    0.83    2.94
  -3  -9   3   13.76    3.05
   3   9  -3    7.22    3.07
  -1  -9   3    2.12    2.68
   1   9  -3    2.12    2.70
   1  -9   3    4.37    2.85
  -1   9  -3   -1.71    2.55
  -3  -9  -3    0.23    2.13
   3  -9   3   -4.21    2.60
  -3   9  -3   -6.45    1.90
  -3   9  -3    3.77    2.62
   5  -9   3    3.78    2.97
  -5  -9  -3    0.32    2.02
  -5   9  -3   -1.99    2.11
  -5   9  -3    2.60    2.51
   7  -9   3   55.23    5.08
  -7   9  -3   46.89    4.09
  -7   9  -3   46.91    3.90
   9  -9   3   18.26    3.79
  -9   9  -3   23.70    3.60
  -9   9  -3   25.33    3.58
  11  -9   3    0.23    2.70
 -11   9  -3   -0.97    2.40
  13  -9   3   55.46    5.39
 -13   9  -3   43.49    4.36
  15  -9   3    3.92    3.42
 -15   9  -3    5.41    2.82
  17  -9   3    6.69    3.38
 -17   9  -3   10.35    3.13
  19  -9   3    6.71    3.62
 -19   9  -3   14.03    3.27
  21  -9   3   -0.91    3.35
 -21   9  -3    1.42    2.91
  23  -9   3    1.87    3.67
 -23   9  -3    0.50    2.96
  25  -9   3    2.61    3.48
 -25   9  -3    2.90    3.14
  27  -9   3    6.57    4.01
 -27   9  -3   -4.72    2.93
  29  -9   3   10.63    4.50
 -29   9  -3    4.96    3.59
 -30 -10   3    8.66    3.79
  30 -10  -3    7.01    4.11
 -28 -10   3    3.27    3.36
  28 -10  -3    1.53    3.53
  26 -10  -3   10.12    3.98
 -26 -10   3   15.05    3.81
 -24 -10   3   -2.00    2.85
 -22 -10   3   22.64    3.78
  22  10  -3   21.72    4.53
 -20 -10   3    2.94    2.76
  20  10  -3    5.15    3.37
  18  10  -3    3.70    3.52
  16  10  -3    5.37    3.30
  14  10  -3   -1.86    2.77
  12  10  -3    4.58    3.49
  10  10  -3    9.35    3.36
  -8 -10   3    3.60    2.77
   8  10  -3    7.83    3.27
  -6 -10   3   33.47    4.05
   6  10  -3   34.39    4.71
  -4 -10   3    3.97    2.84
   4  10  -3   -1.63    2.91
   2 -10  -3   14.81    3.09
  -2 -10   3    7.79    3.14
   2  10  -3   11.33    3.43
   0 -10  -3   28.65    3.80
   0 -10   3   18.38    3.64
   0  10  -3   17.47    3.55
  -2 -10  -3    0.94    2.41
   2 -10   3    5.47    3.18
  -2  10  -3    0.72    2.82
   4 -10   3    7.31    3.36
  -4  10  -3    9.74    3.20
  -4  10  -3    7.28    2.59
   6 -10   3    6.60    3.51
  -6  10  -3   15.72    2.85
  -6  10  -3    9.27    2.99
   8 -10   3    1.76    3.08
  -8  10  -3   10.87    2.94
  -8  10  -3    8.75    2.71
  10 -10   3    3.08    3.14
 -10  10  -3    7.60    2.69
  12 -10   3    8.26    3.66
 -12  10  -3   10.71    2.90
  14 -10   3    4.42    3.58
 -14  10  -3   -0.25    2.56
  16 -10   3    2.42    3.60
 -16  10  -3    0.56    2.56
  18 -10   3   -2.58    3.29
 -18  10  -3    0.87    2.81
  20 -10   3   -0.75    3.55
 -20  10  -3    5.47    3.02
  22 -10   3   11.35    4.24
 -22  10  -3    7.00    3.42
  24 -10   3    2.72    4.03
 -24  10  -3    5.04    3.42
  26 -10   3   -6.17    3.44
 -26  10  -3    2.48    3.28
 -27 -11   3    0.78    3.22
  27 -11  -3    4.66    3.82
  25 -11  -3   -0.27    3.85
 -25 -11   3    1.91    3.20
  23 -11  -3    2.86    3.47
 -23 -11   3    0.50    3.27
  21 -11  -3    8.64    3.72
 -21 -11   3    3.49    3.12
  19 -11  -3   -0.68    3.30
  19  11  -3    2.82    3.54
  17 -11  -3   10.43    3.92
  17  11  -3    7.56    3.62
  15 -11  -3    1.71    3.15
  15  11  -3    1.99    3.04
  13 -11  -3    7.70    3.35
  13  11  -3   -0.41    3.26
  11 -11  -3    6.30    3.51
  11  11  -3    4.89    3.35
   9 -11  -3    6.66    3.10
   9  11  -3    9.95    3.58
   7 -11  -3   -1.21    2.88
   7  11  -3    2.56    3.15
   5 -11  -3   22.66    3.93
  -5 -11   3   20.86    3.82
   5  11  -3   28.33    4.51
   3 -11  -3    9.87    3.16
  -3 -11   3    7.25    3.24
   3  11  -3    2.02    3.12
  -1 -11   3    7.67    3.38
   1 -11  -3    7.77    3.07
   1  11  -3    4.84    3.27
   1 -11   3   -0.49    3.17
  -1  11  -3   -1.03    2.82
   3 -11   3   22.09    4.16
  -3  11  -3   25.21    3.98
   5 -11   3    9.13    3.71
  -5  11  -3   18.89    3.69
   7 -11   3   -1.35    3.35
  -7  11  -3   -1.84    2.39
   9 -11   3    0.89    3.27
  -9  11  -3   -0.37    2.45
  11 -11   3   -0.80    3.54
 -11  11  -3   -2.96    2.39
  13 -11   3    1.65    3.69
 -13  11  -3   -3.30    2.38
  15 -11   3    5.36    4.07
 -15  11  -3    2.16    3.02
  17 -11   3    7.35    4.32
 -17  11  -3    2.10    3.07
  19 -11   3   -4.05    3.34
 -19  11  -3    1.21    2.98
  21 -11   3    1.43    3.71
 -21  11  -3    4.03    3.17
  22 -12  -3   -2.32    3.40
  20 -12  -3   16.46    4.50
  18 -12  -3    3.95    3.96
  16 -12  -3   10.57    4.25
  16  12  -3    5.85    3.80
  14 -12  -3   10.21    4.20
  14  12  -3   15.72    4.42
  12 -12  -3    9.66    4.00
  12  12  -3    9.96    3.84
  10 -12  -3    4.35    3.62
  10  12  -3    6.61    3.44
   8 -12  -3    4.65    3.53
   8  12  -3    6.20    3.68
   6 -12  -3    8.78    3.55
   6  12  -3    5.96    3.59
   4 -12  -3    0.58    3.05
  -4 -12   3   -0.29    3.21
   4  12  -3   -1.32    3.26
   2 -12  -3    9.95    3.36
  -2 -12   3   -0.58    3.36
   2  12  -3    3.06    3.40
   0 -12   3    3.25    3.51
   0  12  -3    5.65    3.25
   2 -12   3    0.03    3.33
  -2  12  -3   -0.91    2.86
   4 -12   3   -0.91    3.54
  -4  12  -3    1.98    3.10
   6 -12   3   19.25    4.55
   8 -12   3   -2.42    3.63
  10 -12   3    6.31    4.10
  12 -12   3   -3.71    3.68
  14 -12   3    5.68    4.26
  16 -12   3    8.30    4.13
  18 -12   3   -1.75    4.09
  15 -13  -3    1.76    3.88
  13 -13  -3    7.94    4.16
  11 -13  -3    4.73    3.80
   9 -13  -3    5.70    3.83
   7 -13  -3   11.66    4.13
   5 -13  -3    3.19    3.61
  -1 -13   3   -3.65    3.33
   1 -13   3   12.71    4.20
   3 -13   3    3.21    3.91
   5 -13   3    1.24    3.86
   7 -13   3   16.39    4.52
   9 -13   3   12.99    4.65
  11 -13   3    8.43    4.53
 -44   0   4    1.01    3.04
  44   0  -4   -5.32    2.56
 -44   0   4    4.36    3.54
 -42   0   4   19.67    4.16
 -42   0   4   11.54    3.76
  42   0  -4   14.76    2.97
 -40   0   4   19.03    4.06
 -40   0   4   21.07    3.91
  40   0  -4   19.85    3.01
  38   0  -4   -1.15    2.45
 -38   0   4    2.63    2.90
 -36   0   4   73.40    5.51
  36   0  -4   71.98    5.64
  36   0  -4   71.79    4.30
 -34   0   4   10.40    3.29
  34   0  -4    8.02    2.58
  34   0  -4   11.98    3.14
  32   0  -4   11.97    2.98
  32   0  -4   10.04    2.54
 -32   0   4   15.73    3.31
 -30   0   4   36.04    4.07
  30   0  -4   32.08    3.39
  30   0  -4   32.48    3.79
 -28   0   4   28.41    3.77
  28   0  -4   35.42    3.14
  28   0  -4   36.61    4.05
  26   0  -4   20.91    2.47
  26   0  -4   25.62    3.29
 -26   0   4   19.42    2.79
  26   0  -4   24.06    2.41
 -24   0   4   45.69    3.41
  24   0  -4   44.43    2.96
  24   0  -4   43.87    2.73
  24   0  -4   37.21    3.75
  22   0  -4    2.74    1.46
 -22   0   4    0.72    1.90
  22   0  -4   -2.35    1.65
  22   0  -4    2.57    1.67
 -20   0   4   30.03    3.02
  20   0  -4   29.42    2.88
  18   0  -4   -0.76    1.59
 -18   0   4    0.74    1.57
  16   0  -4    2.52    1.69
 -16   0   4    4.45    1.61
  14   0  -4   68.12    3.44
 -14   0   4   64.91    3.15
 -12   0   4  203.33    5.13
  12   0  -4  221.36    5.52
  10   0  -4   11.02    1.77
  10   0  -4   11.16    1.71
   8   0  -4  193.38    4.72
   6   0  -4  547.90   10.12
   6   0  -4  552.50   10.10
  -6   0   4  544.02   10.28
   4   0  -4  742.16   12.61
  -4   0   4  739.21   13.42
   4   0  -4  755.42   13.10
   2   0  -4 1000.00   16.52
   2   0  -4  995.17   17.12
  -2   0   4  997.94   17.50
   0   0  -4  262.89    5.43
   0   0   4  274.42    5.91
   0   0  -4  266.30    5.69
   2   0   4   71.08    2.96
  -2   0  -4   73.97    3.14
  -2   0  -4   78.53    2.91
  -4   0  -4  421.85    8.31
   4   0   4  426.58    8.44
  -4   0  -4  437.43    8.67
  -6   0  -4   79.22    3.28
  -6   0  -4   80.54    3.46
   6   0   4   79.21    2.99
   8   0   4   23.48    2.24
  -8   0  -4   24.46    2.71
  -8   0  -4   26.66    2.65
 -10   0  -4    9.86    1.87
 -10   0  -4   17.06    2.23
  10   0   4   12.88    1.83
 -12   0  -4  195.49    5.95
  12   0   4  190.67    5.12
 -12   0  -4  184.81    5.54
  14   0   4    4.38    1.65
 -14   0  -4    4.23    1.91
 -14   0  -4    3.81    1.86
 -16   0  -4  209.63    6.55
 -16   0  -4  199.35    6.33
  16   0   4  214.06    5.74
 -18   0  -4  131.76    5.29
 -18   0  -4  135.10    5.43
  18   0   4  131.68    4.51
  20   0   4    6.57    1.97
 -20   0  -4    7.94    2.37
 -20   0  -4    9.19    2.45
  22   0   4   11.17    2.26
 -22   0  -4   13.91    3.05
 -22   0  -4   11.70    2.74
 -24   0  -4    7.55    2.92
 -24   0  -4    7.09    2.68
 -26   0  -4    9.60    2.91
 -26   0  -4    6.60    2.98
 -28   0  -4    6.46    2.97
 -28   0  -4    7.33    3.05
 -30   0  -4    6.82    3.39
 -30   0  -4    2.45    2.86
 -32   0  -4   27.89    4.46
 -32   0  -4   24.33    4.12
 -34   0  -4   17.82    3.91
 -34   0  -4    9.17    3.55
 -36   0  -4   18.99    4.21
 -36   0  -4   18.36    4.37
 -38   0  -4   25.10    4.73
 -38   0  -4   29.85    4.96
 -45  -1   4    9.68    4.08
 -45   1   4   18.35    4.34
 -43  -1   4   38.99    5.39
 -43  -1   4   37.37    4.88
  43  -1  -4   40.46    4.17
 -43   1   4   48.26    5.50
 -43   1   4   36.18    4.78
 -41  -1   4   38.39    5.12
 -41  -1   4   20.19    4.03
  41  -1  -4   31.08    3.86
 -41   1   4   29.62    4.54
 -41   1   4   21.34    4.24
  41   1  -4   31.97    3.13
 -39  -1   4   -3.71    2.89
  39  -1  -4    3.85    2.74
  39   1  -4    4.62    2.29
 -39   1   4    1.11    2.98
 -39   1   4    2.28    3.06
  37  -1  -4   17.67    3.05
 -37  -1   4   17.11    3.74
 -37   1   4   13.11    3.39
  37   1  -4    9.68    3.62
  37   1  -4   14.36    2.53
  35  -1  -4   20.67    3.75
 -35  -1   4   12.28    3.26
  35  -1  -4   14.87    2.87
 -35   1   4    9.78    3.22
  35   1  -4   16.39    2.47
  35   1  -4   16.32    3.58
  33  -1  -4   -4.73    2.21
  33  -1  -4   -1.86    2.46
 -33  -1   4   -0.16    2.49
 -33   1   4    1.81    2.66
  33   1  -4   -4.29    1.97
  33   1  -4    0.35    2.44
 -31  -1   4    6.75    2.83
  31  -1  -4    0.73    2.35
  31  -1  -4   -0.17    2.26
  31   1  -4   -1.36    1.93
  31   1  -4   -2.92    2.25
 -31   1   4    0.79    2.38
  29  -1  -4   99.25    5.41
  29  -1  -4   95.40    4.51
 -29  -1   4  108.93    5.48
  29   1  -4   97.31    3.99
 -29   1   4  101.70    5.35
  29   1  -4  103.05    5.66
  27  -1  -4  133.64    4.84
 -27  -1   4  113.68    5.49
  27  -1  -4  120.99    5.65
  27   1  -4  126.74    4.31
 -27   1   4  132.98    5.47
  27   1  -4  121.01    4.61
  27   1  -4  121.94    5.60
  25  -1  -4   -0.63    2.14
  25  -1  -4    5.11    2.05
 -25  -1   4    1.13    1.97
  25   1  -4    3.81    1.76
  25   1  -4    3.98    1.78
 -25   1   4    6.02    2.15
  25   1  -4    7.93    2.52
 -23  -1   4  163.91    5.68
  23  -1  -4  167.66    4.14
  23  -1  -4  164.38    5.88
  23  -1  -4  156.82    4.95
  23   1  -4  172.88    6.09
  23   1  -4  167.46    4.64
 -23   1   4  162.61    5.57
  23   1  -4  165.28    5.04
 -21  -1   4  163.76    5.58
  21  -1  -4  161.92    5.59
  21   1  -4  161.84    4.35
  21   1  -4  160.09    4.98
 -21   1   4  168.64    5.47
  21   1  -4  165.07    5.64
  19  -1  -4   46.46    3.34
 -19  -1   4   46.89    3.07
 -19   1   4   42.84    2.91
  19   1  -4   45.00    3.28
  17  -1  -4   84.24    3.62
 -17  -1   4   76.92    3.79
 -17   1   4   83.39    3.67
  17   1  -4   81.16    4.05
 -15  -1   4   40.42    2.98
  15  -1  -4   31.43    2.74
  15   1  -4   34.51    2.85
 -15   1   4   34.31    2.66
  13  -1  -4   58.41    2.81
  13   1  -4   58.82    3.01
 -13   1   4   56.66    2.77
  11  -1  -4   78.08    2.97
  11   1  -4   83.72    3.54
 -11   1   4   86.98    2.93
  11   1  -4   89.99    3.43
   9  -1  -4   50.57    2.59
   9  -1  -4   50.97    2.74
  -9  -1   4   47.78    2.61
  -9   1   4   54.86    2.33
   9   1  -4   50.82    2.75
   7  -1  -4   10.88    1.50
   7  -1  -4    7.86    1.44
  -7  -1   4    9.53    1.61
   7   1  -4    9.92    1.51
   7   1  -4    8.49    1.59
   5  -1  -4    0.81    1.23
   5  -1  -4    4.23    1.31
  -5  -1   4    2.72    1.59
   5   1  -4    2.02    1.33
   5   1  -4    1.14    1.34
   3  -1  -4  272.86    4.91
   3  -1  -4  267.42    5.53
  -3  -1   4  266.64    5.93
   3   1  -4  275.40    5.91
   3   1  -4  268.63    5.60
   1  -1  -4  671.83   12.03
   1  -1  -4  684.28   11.40
   1   1  -4  682.08   12.26
  -1   1   4  698.47   12.40
   1   1  -4  678.98   12.06
  -1  -1  -4  266.17    5.28
   1  -1   4  270.24    6.06
  -1  -1  -4  274.00    5.78
  -1   1  -4  267.19    5.93
  -1   1  -4  268.89    5.90
   1   1   4  267.22    5.70
  -3  -1  -4   42.24    2.35
  -3  -1  -4   38.58    2.29
   3  -1   4   38.99    2.50
  -3   1  -4   39.23    2.49
  -3   1  -4   43.30    2.78
   3   1   4   40.23    2.11
  -5  -1  -4   91.26    3.17
  -5  -1  -4   86.48    3.23
   5  -1   4   86.68    3.45
   5   1   4   87.49    2.91
  -5   1  -4   87.63    3.34
  -5   1  -4   87.76    3.38
  -7  -1  -4    0.13    1.41
  -7  -1  -4    1.26    1.52
   7  -1   4    5.49    1.70
   7   1   4    2.75    1.20
  -7   1  -4    3.18    1.51
  -7   1  -4    0.57    1.47
   9  -1   4  167.92    4.91
  -9  -1  -4  166.33    4.91
  -9  -1  -4  165.45    4.96
  -9   1  -4  165.11    4.96
   9   1   4  167.68    4.25
  -9   1  -4  168.03    5.01
  11  -1   4   18.77    2.56
 -11  -1  -4   17.35    2.34
 -11  -1  -4   20.69    2.72
 -11   1  -4   22.96    2.90
 -11   1  -4   23.03    2.94
  11   1   4   22.00    2.09
 -13  -1  -4    0.50    1.81
 -13  -1  -4    1.14    1.62
  13  -1   4    0.26    1.62
 -13   1  -4   -0.61    1.63
 -13   1  -4   -1.24    1.53
  13   1   4   -0.46    1.26
 -15  -1  -4    8.08    2.01
 -15  -1  -4    3.96    2.05
  15  -1   4    6.02    1.88
 -15   1  -4    2.98    1.88
 -15   1  -4    2.95    1.80
  15   1   4    7.92    1.55
  17  -1   4    9.51    2.05
 -17  -1  -4    9.87    2.19
 -17  -1  -4    9.68    2.23
 -17   1  -4    5.53    2.26
  17   1   4    7.47    1.59
 -17   1  -4    9.16    2.32
 -19  -1  -4   95.67    4.78
  19  -1   4   93.51    4.33
 -19  -1  -4   87.88    4.78
 -19   1  -4  101.89    5.01
 -19   1  -4   98.42    5.09
  19   1   4   98.64    3.61
 -21  -1  -4   26.14    3.67
 -21  -1  -4   33.27    3.87
  21  -1   4   26.19    3.26
  21   1   4   24.11    2.48
 -21   1  -4   26.38    3.37
 -21   1  -4   21.39    3.13
 -23  -1  -4   39.73    3.86
 -23  -1  -4   35.63    4.14
  23  -1   4   42.38    3.58
 -23   1  -4   36.97    3.84
 -23   1  -4   34.43    4.17
 -25  -1  -4   59.40    4.84
 -25  -1  -4   58.38    4.88
  25  -1   4   59.47    4.22
 -25   1  -4   58.25    4.90
 -25   1  -4   60.51    4.56
 -27  -1  -4   -0.61    2.65
 -27  -1  -4    0.58    2.75
 -27   1  -4    1.81    2.86
 -27   1  -4    0.81    2.67
 -29  -1  -4   28.81    4.09
 -29  -1  -4   23.68    3.93
 -29   1  -4   28.79    4.04
 -29   1  -4   24.47    4.11
 -31  -1  -4   30.08    4.26
 -31  -1  -4   32.50    4.42
 -31   1  -4   31.67    4.58
 -31   1  -4   29.86    4.37
 -33  -1  -4    1.91    3.27
 -33  -1  -4   -6.03    2.98
 -33   1  -4   -3.78    2.58
 -33   1  -4   -1.05    3.22
 -35  -1  -4   21.27    4.39
 -35  -1  -4   20.43    4.47
 -35   1  -4   32.72    4.95
 -35   1  -4   20.10    4.20
 -37  -1  -4    1.30    3.74
 -37  -1  -4    1.33    3.51
 -37   1  -4   -0.54    3.61
 -37   1  -4    6.25    3.42
 -44  -2   4    2.25    3.73
 -44  -2   4    6.02    3.85
  44  -2  -4    6.76    3.37
 -44   2   4    1.89    3.29
 -44   2   4   10.23    4.11
 -42  -2   4   28.26    4.58
 -42  -2   4   15.70    4.17
  42  -2  -4   19.34    3.56
 -42   2   4   11.49    3.93
 -42   2   4   12.69    3.93
 -40  -2   4    6.59    3.57
  40  -2  -4   -2.34    2.79
 -40   2   4    9.27    3.53
 -40   2   4    9.49    3.33
  38  -2  -4    0.63    2.69
 -38  -2   4    3.13    3.24
 -38   2   4    3.63    3.05
 -38   2   4   -3.27    2.74
  38   2  -4    1.32    3.27
 -36  -2   4   49.75    4.65
  36  -2  -4   47.17    4.39
  36   2  -4   45.36    2.82
  36   2  -4   48.28    5.11
 -36   2   4   44.78    4.81
 -36   2   4   42.06    4.34
 -34  -2   4   44.56    4.76
  34  -2  -4   52.77    4.15
  34   2  -4   39.15    4.39
  34   2  -4   48.67    2.91
 -34   2   4   45.27    4.53
 -32  -2   4   15.49    3.24
  32  -2  -4   13.48    3.30
  32  -2  -4   12.98    2.95
  32   2  -4   14.74    3.36
 -32   2   4   18.83    3.31
  32   2  -4   20.75    2.62
  30  -2  -4   52.78    4.42
 -30  -2   4   36.07    4.19
  30  -2  -4   34.85    3.75
  30   2  -4   39.13    4.41
 -30   2   4   33.89    4.03
  30   2  -4   38.17    3.48
  30   2  -4   41.96    2.89
  28  -2  -4   48.88    3.83
 -28  -2   4   43.37    3.85
  28  -2  -4   50.88    3.88
  28   2  -4   36.79    4.25
 -28   2   4   43.74    3.71
  28   2  -4   48.20    3.76
  28   2  -4   48.27    2.92
 -26  -2   4   12.67    2.70
  26  -2  -4    9.49    2.56
  26  -2  -4   13.43    2.59
  26   2  -4   10.34    1.84
 -26   2   4    7.09    2.46
  26   2  -4    9.03    2.22
  26   2  -4    9.61    2.60
  24  -2  -4    6.76    2.30
  24  -2  -4   10.59    2.18
 -24  -2   4   10.12    2.34
  24   2  -4    8.11    1.65
  24   2  -4    9.25    2.39
  24   2  -4    5.94    2.17
 -24   2   4    3.84    2.16
  22  -2  -4    6.16    0.94
 -22  -2   4    5.68    2.03
  22  -2  -4    8.61    2.11
  22  -2  -4    5.75    1.97
  22   2  -4    4.52    2.18
 -22   2   4    8.42    1.97
  22   2  -4    7.25    1.54
  22   2  -4    6.26    2.00
  20  -2  -4    1.06    1.73
 -20  -2   4    1.46    1.91
  20   2  -4    6.48    2.00
  20   2  -4    1.02    1.93
  20   2  -4    3.88    1.31
 -20   2   4    2.67    1.78
  18  -2  -4    9.04    1.78
 -18  -2   4    4.72    1.95
  18   2  -4    6.20    2.08
 -18   2   4    7.15    1.91
  18   2  -4    9.31    1.44
  16  -2  -4  120.42    4.15
 -16  -2   4  110.83    4.18
 -16   2   4  117.83    4.04
  16   2  -4  112.99    4.37
  14  -2  -4  255.86    6.17
  14   2  -4  256.88    6.69
 -14   2   4  274.79    6.17
  12  -2  -4   -0.58    1.28
 -12  -2   4   -1.43    1.15
 -12   2   4    2.40    1.35
  12   2  -4    1.89    1.63
  10  -2  -4  104.69    3.23
 -10  -2   4  100.98    3.27
  10   2  -4  100.44    3.64
 -10   2   4  101.68    3.03
  10   2  -4  108.22    3.73
   8  -2  -4  153.21    3.77
  -8  -2   4  153.62    4.22
   8  -2  -4  160.90    4.01
   8   2  -4  163.48    4.57
  -8   2   4  151.67    3.40
   8   2  -4  156.35    4.27
   6  -2  -4    6.48    1.23
  -6  -2   4    2.05    1.37
   6  -2  -4    4.04    1.15
   6   2  -4    6.34    1.41
   6   2  -4    8.82    1.64
  -6   2   4    5.46    0.79
  -4  -2   4    9.42    1.67
   4  -2  -4   11.66    1.66
   4   2  -4   10.78    1.65
   4   2  -4    9.56    1.58
   4   2  -4   11.01    1.74
  -2  -2   4   11.17    1.85
   2  -2  -4   11.75    1.50
   2  -2  -4   15.16    0.93
   2   2  -4   12.23    1.63
   2   2  -4    9.32    1.72
  -2   2   4   11.14    0.94
   0  -2  -4  165.39    3.37
   0  -2   4  166.45    4.83
   0  -2  -4  172.59    3.95
   0   2  -4  169.09    4.43
   2  -2   4   51.10    3.20
  -2  -2  -4   54.75    2.12
  -2  -2  -4   50.90    2.49
  -2   2  -4   58.61    2.79
  -2   2  -4   51.95    2.68
  -4  -2  -4   49.80    2.60
   4  -2   4   44.04    3.06
  -4  -2  -4   55.02    2.36
  -4   2  -4   56.55    3.00
  -4   2  -4   48.64    2.81
   6  -2   4   45.27    3.25
  -6  -2  -4   39.91    2.64
  -6  -2  -4   46.13    2.65
  -6   2  -4   46.98    2.85
  -6   2  -4   50.84    3.07
   6   2   4   46.01    2.13
  -8  -2  -4    0.63    1.51
   8  -2   4    2.35    1.83
  -8  -2  -4   -1.91    1.48
   8  -2   4    2.20    1.73
  -8   2  -4   -0.07    1.44
   8   2   4   -1.37    0.99
  -8   2  -4    1.08    1.72
  10  -2   4   73.47    3.56
 -10  -2  -4   73.22    3.48
 -10  -2  -4   77.15    3.69
  10  -2   4   74.51    3.51
 -10   2  -4   77.05    3.74
 -10   2  -4   70.97    3.57
  10   2   4   71.03    2.41
 -12  -2  -4   63.06    3.42
  12  -2   4   60.35    3.69
 -12  -2  -4   65.14    3.55
  12  -2   4   71.00    3.45
 -12   2  -4   66.60    3.75
  12   2   4   68.57    2.34
 -12   2  -4   64.16    3.78
  14  -2   4    0.83    1.77
 -14  -2  -4   -2.72    1.69
  14  -2   4    1.76    1.88
 -14  -2  -4    0.14    1.79
 -14   2  -4   -0.65    1.65
 -14   2  -4    1.06    1.66
  14   2   4   -0.15    1.04
  16  -2   4   48.11    3.51
 -16  -2  -4   44.86    3.53
 -16  -2  -4   39.97    3.54
  16  -2   4   46.70    3.29
 -16   2  -4   51.17    3.78
 -16   2  -4   46.23    3.49
  16   2   4   46.20    2.16
 -18  -2  -4  129.12    5.38
  18  -2   4  136.68    5.45
  18  -2   4  132.48    4.80
 -18  -2  -4  143.29    5.72
  18   2   4  134.47    3.59
 -18   2  -4  143.51    5.56
 -18   2  -4  136.80    5.49
 -20  -2  -4   14.83    2.94
  20  -2   4   21.09    3.02
 -20  -2  -4   20.40    2.91
 -20   2  -4   17.47    2.82
 -20   2  -4   24.68    3.26
 -22  -2  -4   23.80    3.34
 -22  -2  -4   16.20    2.97
  22  -2   4   22.75    3.33
 -22   2  -4   17.60    3.20
 -22   2  -4   15.37    2.95
 -24  -2  -4    0.67    2.58
 -24  -2  -4    5.68    2.81
  24  -2   4    3.48    2.44
 -24   2  -4    2.70    2.54
 -24   2  -4   -0.65    2.50
 -26  -2  -4   -2.53    2.48
  26  -2   4    1.87    2.55
 -26  -2  -4   -0.49    2.43
 -26   2  -4    1.18    2.65
 -26   2  -4   -2.90    2.35
  28  -2   4   -4.12    2.25
 -28  -2  -4    2.44    2.68
 -28  -2  -4   -0.52    2.54
 -28   2  -4    1.30    2.53
 -28   2  -4    2.49    2.96
 -30  -2  -4    0.69    2.70
 -30  -2  -4    0.13    2.96
 -30   2  -4   -3.79    2.88
 -30   2  -4    1.12    2.73
 -32  -2  -4    8.45    3.60
 -32  -2  -4   20.85    4.09
 -32   2  -4   14.73    3.95
 -32   2  -4   20.40    3.74
 -34  -2  -4    5.55    3.42
 -34  -2  -4    3.58    3.42
 -34   2  -4   -1.63    3.13
 -34   2  -4    5.12    3.65
 -36  -2  -4    9.80    4.01
 -36  -2  -4    6.22    3.74
 -36   2  -4   14.37    4.09
 -36   2  -4    5.26    3.34
 -43  -3   4   -0.07    3.32
  43  -3  -4    0.91    3.30
 -43  -3   4    9.44    3.65
 -43   3   4    1.75    3.41
 -43   3   4   -1.30    3.15
  41  -3  -4    7.61    3.27
 -41  -3   4    6.42    3.46
 -41  -3   4    7.74    3.83
 -41   3   4   11.50    3.81
 -41   3   4    8.02    3.43
 -39  -3   4   -0.74    3.24
  39  -3  -4   -5.08    2.75
 -39   3   4   -0.79    2.93
  39   3  -4    0.70    3.26
 -39   3   4   -3.79    2.81
 -37  -3   4   26.93    4.41
  37  -3  -4   23.41    3.66
 -37   3   4   31.32    4.16
 -37   3   4   31.08    4.23
  37   3  -4   25.67    4.09
  35  -3  -4   15.41    3.23
 -35  -3   4   14.17    3.43
 -35   3   4    8.60    3.20
 -35   3   4   12.92    3.38
  35   3  -4   13.62    3.55
  33  -3  -4   11.35    3.08
 -33  -3   4    9.94    3.05
  33   3  -4   13.76    3.22
 -33   3   4   11.40    3.04
 -33   3   4    6.37    2.74
 -31  -3   4    1.95    2.73
  31  -3  -4    3.20    2.70
  31   3  -4   -0.31    2.35
 -31   3   4   -1.35    2.47
  31   3  -4    0.81    2.80
  29  -3  -4   27.75    3.41
 -29  -3   4   23.49    3.32
  29  -3  -4   22.88    3.29
  29   3  -4   29.47    3.86
  29   3  -4   26.34    3.70
 -29   3   4   27.54    3.70
  27  -3  -4   34.38    3.72
 -27  -3   4   40.42    3.79
  27  -3  -4   38.01    3.74
  27   3  -4   49.41    4.09
 -27   3   4   50.71    3.99
  27   3  -4   40.18    4.19
  27   3  -4   39.59    1.97
  25  -3  -4    2.72    2.38
 -25  -3   4    5.82    2.21
  25  -3  -4    5.48    2.23
  25   3  -4    4.17    2.25
 -25   3   4    3.30    1.98
  25   3  -4    3.14    2.33
  25   3  -4    4.03    1.17
  23  -3  -4   78.26    4.06
  23  -3  -4   79.75    4.03
 -23  -3   4   77.93    4.23
  23   3  -4   80.04    2.41
 -23   3   4   74.55    4.01
  23   3  -4   71.11    4.43
  23   3  -4   76.68    4.23
  21  -3  -4   21.04    2.76
 -21  -3   4   18.73    2.60
  21   3  -4   25.19    3.21
  21   3  -4   24.29    1.75
  21   3  -4   27.82    3.07
 -21   3   4   19.65    2.69
  19  -3  -4    1.88    1.65
 -19  -3   4   -0.15    1.93
  19   3  -4   -0.72    1.99
 -19   3   4    0.69    1.56
  19   3  -4    1.38    1.94
  19   3  -4    1.39    1.06
  17  -3  -4   18.11    2.57
 -17   3   4   20.09    2.33
  17   3  -4   18.93    2.60
  17   3  -4   19.75    1.57
  17   3  -4   28.96    3.35
 -15  -3   4  193.04    4.75
  15  -3  -4  197.58    5.15
 -15   3   4  197.37    5.05
  15   3  -4  200.77    5.96
  13  -3  -4    5.34    1.47
 -13  -3   4    1.03    1.30
  13   3  -4    1.97    1.79
 -13   3   4    3.75    1.38
  11  -3  -4   55.98    2.35
 -11  -3   4   50.11    2.70
  11   3  -4   52.53    2.80
 -11   3   4   58.39    2.41
  11   3  -4   53.42    3.19
  -9  -3   4   42.31    2.50
   9  -3  -4   43.21    1.94
   9   3  -4   40.52    1.97
   9   3  -4   45.73    2.66
  -9   3   4   41.07    1.85
   9   3  -4   41.89    2.47
   7  -3  -4   18.05    1.58
  -7  -3   4   19.61    2.33
   7  -3  -4   18.70    1.73
  -7   3   4   17.90    1.23
   7   3  -4   19.48    2.21
   7   3  -4   18.71    1.74
   7   3  -4   19.12    2.45
   5  -3  -4   18.58    1.55
   5  -3  -4   20.48    1.62
  -5  -3   4   21.90    2.46
   5   3  -4   19.97    2.39
   5   3  -4   24.08    1.96
   5   3  -4   19.43    2.17
  -3  -3   4   21.93    2.72
   3  -3  -4   19.89    1.55
   3   3  -4   18.07    2.60
   3   3  -4   23.03    2.35
   3   3  -4   20.84    2.17
  -1  -3   4    7.23    1.79
   1  -3  -4    7.50    0.76
   1  -3  -4   11.44    1.38
   1   3  -4    9.42    1.49
   1   3  -4    7.76    1.62
   1  -3   4    9.17    1.70
   1  -3   4    7.50    1.94
  -1  -3  -4   12.56    1.62
  -1  -3  -4    7.05    1.03
  -1   3  -4    8.52    1.80
  -1   3  -4    8.44    1.44
   3  -3   4   20.10    2.98
   3  -3   4   21.99    2.67
  -3  -3  -4   16.86    1.72
  -3  -3  -4   22.10    1.92
  -3   3  -4   23.18    2.49
  -3   3  -4   17.14    2.32
   5  -3   4  112.23    4.01
  -5  -3  -4  106.75    3.34
  -5  -3  -4  111.15    3.58
   5  -3   4  113.81    4.36
  -5   3  -4  110.28    4.05
  -5   3  -4  119.43    4.00
  -7  -3  -4   -1.31    1.28
   7  -3   4   -0.94    1.87
  -7  -3  -4    0.75    1.39
   7  -3   4   -0.76    1.73
  -7   3  -4   -1.60    1.35
  -7   3  -4    2.67    1.62
   9  -3   4   13.75    2.19
   9  -3   4   16.38    2.49
  -9  -3  -4   18.34    2.29
  -9  -3  -4   16.62    2.40
  -9   3  -4   17.93    2.41
  -9   3  -4   14.10    2.11
  11  -3   4   75.44    3.86
 -11  -3  -4   82.00    3.68
 -11  -3  -4   77.30    3.56
  11  -3   4   69.67    3.66
 -11   3  -4   69.95    3.72
 -11   3  -4   66.58    3.65
 -13  -3  -4   18.13    2.41
  13  -3   4   12.11    2.32
  13  -3   4   12.74    2.27
 -13  -3  -4   18.02    2.33
 -13   3  -4   16.83    2.54
 -13   3  -4   14.64    2.29
 -15  -3  -4    7.45    2.17
 -15  -3  -4   10.27    2.11
  15  -3   4   12.16    2.33
  15  -3   4    9.98    2.28
 -15   3  -4    5.47    2.08
 -15   3  -4   10.06    2.17
 -17  -3  -4    3.16    1.92
  17  -3   4   -0.66    2.12
 -17  -3  -4    0.73    1.99
  17  -3   4    1.47    2.13
 -17   3  -4    3.77    2.10
 -17   3  -4    4.95    2.16
  19  -3   4   33.58    3.69
 -19  -3  -4   27.90    3.26
 -19  -3  -4   32.04    3.62
  19  -3   4   26.04    3.47
 -19   3  -4   31.20    3.73
 -19   3  -4   25.59    3.19
 -21  -3  -4    1.74    2.16
  21  -3   4    1.09    2.46
  21  -3   4    4.12    2.53
 -21  -3  -4    1.32    2.38
 -21   3  -4    6.50    2.63
 -21   3  -4    6.16    2.49
  23  -3   4    5.72    2.62
 -23  -3  -4    2.77    2.53
 -23  -3  -4    2.99    2.68
  23  -3   4    6.46    2.74
 -23   3  -4    2.48    2.54
 -23   3  -4    7.95    2.60
  25  -3   4    5.90    2.83
  25  -3   4    7.59    2.78
 -25  -3  -4    5.58    2.91
 -25  -3  -4    9.25    2.96
 -25   3  -4   10.25    2.90
 -25   3  -4    3.25    2.94
 -27  -3  -4    0.67    2.71
  27  -3   4    4.66    2.80
 -27  -3  -4    2.16    2.83
 -27   3  -4    0.60    2.92
 -27   3  -4    1.71    2.75
 -29  -3  -4   10.53    3.23
 -29  -3  -4    6.89    3.29
  29  -3   4    7.97    3.06
 -29   3  -4    5.15    2.94
 -29   3  -4   11.14    3.59
 -31  -3  -4   16.00    3.81
 -31  -3  -4   10.45    3.72
 -31   3  -4   18.97    3.93
 -31   3  -4   16.00    3.72
 -33  -3  -4    3.96    3.54
 -33  -3  -4    3.48    3.34
 -33   3  -4   -1.48    2.99
 -33   3  -4    3.09    3.22
 -35  -3  -4   -3.17    2.85
 -35  -3  -4    2.04    3.58
 -35   3  -4   -6.25    2.66
 -35   3  -4    0.56    3.42
 -37  -3  -4    6.36    3.95
 -37  -3  -4    2.32    3.43
 -37   3  -4    5.29    3.60
 -37   3  -4    5.63    3.72
 -42  -4   4    5.57    3.39
  42  -4  -4    6.92    3.61
 -42  -4   4    9.40    4.25
 -42   4   4   -1.51    3.30
 -42   4   4    8.40    3.66
 -40  -4   4    3.41    3.37
  40  -4  -4    3.22    3.21
 -40   4   4   -0.74    2.68
  40   4  -4    1.19    3.21
 -40   4   4   -0.10    2.73
 -38  -4   4    7.86    3.75
  38  -4  -4   19.09    3.74
 -38   4   4   14.93    3.57
 -38   4   4    8.98    3.38
  38   4  -4   21.93    4.28
  36  -4  -4    2.75    3.08
 -36  -4   4    1.43    3.12
 -36   4   4    5.62    3.08
  36   4  -4    1.47    3.07
 -36   4   4    2.60    2.95
  34  -4  -4    1.49    2.97
 -34  -4   4    4.38    3.17
 -34   4   4    3.49    2.77
  34   4  -4   -1.13    2.63
 -34   4   4    1.64    2.72
 -32  -4   4    1.49    2.61
  32  -4  -4    0.20    2.85
 -32   4   4    0.28    2.62
 -32   4   4    1.42    2.55
  32   4  -4    3.12    2.84
  32   4  -4   -0.01    2.62
 -30  -4   4    2.28    2.76
  30  -4  -4    4.46    2.85
  30   4  -4    6.36    2.84
  30   4  -4    3.00    2.88
 -30   4   4    5.55    2.69
 -30   4   4    9.09    2.62
 -28  -4   4    0.64    2.59
  28  -4  -4    0.59    2.59
  28   4  -4    3.16    2.72
 -28   4   4   -0.70    2.18
  28   4  -4    0.49    2.44
 -26  -4   4    4.61    2.48
  26  -4  -4   10.69    2.79
  26   4  -4    8.08    2.74
  26   4  -4    8.17    2.54
 -26   4   4   10.87    2.52
  24  -4  -4    7.06    2.53
  24  -4  -4    5.31    2.13
 -24  -4   4    3.11    2.20
 -24   4   4    3.24    2.06
  24   4  -4    5.75    2.54
  24   4  -4    9.42    2.62
 -22  -4   4   46.32    3.92
  22  -4  -4   48.66    3.57
  22  -4  -4   42.89    3.13
 -22   4   4   38.47    3.18
  22   4  -4   41.63    3.79
  22   4  -4   41.28    3.59
  20  -4  -4    2.86    1.73
 -20  -4   4    0.81    2.06
  20   4  -4    1.99    2.06
 -20   4   4    1.62    1.69
  20   4  -4    2.07    2.05
  18  -4  -4    2.25    1.58
  18   4  -4   -1.20    1.59
  18   4  -4    2.84    2.08
 -18   4   4    2.68    1.54
  16  -4  -4   -1.57    1.27
 -16  -4   4    2.41    1.28
  16   4  -4    1.87    2.24
  16   4  -4    3.46    1.92
 -16   4   4    0.25    1.30
 -14  -4   4    0.37    1.30
  14  -4  -4   -1.45    1.20
  14   4  -4    1.02    1.74
  14   4  -4    2.65    2.28
 -14   4   4   -0.05    1.30
 -12  -4   4   14.69    1.79
  12  -4  -4   17.47    1.76
  12   4  -4   17.44    2.23
 -12   4   4   14.44    1.79
  10  -4  -4   -0.18    0.94
 -10  -4   4    0.23    1.44
  10   4  -4   -0.29    1.56
  10   4  -4   -0.37    0.84
  10   4  -4    0.37    1.38
 -10   4   4    1.10    1.06
  -8  -4   4    0.11    1.52
   8  -4  -4    1.32    0.81
   8   4  -4   -0.77    1.49
   8   4  -4    1.58    1.38
   8   4  -4    4.86    1.07
  -8   4   4    1.50    0.89
   6  -4  -4   11.72    1.13
  -6  -4   4   10.76    1.94
   6   4  -4   14.56    2.05
   6   4  -4   11.11    1.34
  -6   4   4   13.53    1.16
   6   4  -4   12.78    1.79
   4  -4  -4   76.75    2.05
   4  -4  -4   73.56    2.00
  -4  -4   4   74.21    3.69
   4   4  -4   76.69    2.75
   4   4  -4   74.48    3.29
   4   4  -4   78.21    3.13
   4   4  -4   78.56    3.34
   2  -4  -4   15.78    1.28
  -2  -4   4   13.97    2.09
  -2  -4   4   18.58    2.41
   2  -4  -4   14.33    1.08
   2   4  -4   16.17    1.83
   2   4  -4   17.44    2.33
   2   4  -4   15.85    1.68
   2   4  -4   13.16    1.64
   0  -4  -4   16.84    1.33
   0  -4   4   18.08    2.02
   0  -4   4   19.98    2.66
   0  -4  -4   19.03    1.40
   0   4  -4   21.92    2.14
   0   4  -4   16.35    1.79
   0   4  -4   16.86    2.29
   2  -4   4   23.85    2.89
  -2  -4  -4   22.99    1.62
  -2  -4  -4   25.39    1.74
   2  -4   4   22.90    2.44
  -2   4  -4   25.61    2.44
  -2   4  -4   19.10    2.28
   4  -4   4  208.10    6.34
   4  -4   4  214.44    5.32
  -4  -4  -4  204.28    4.75
  -4  -4  -4  204.44    4.73
  -4   4  -4  209.73    5.90
  -4   4  -4  204.60    5.39
   6  -4   4    2.85    2.15
  -6  -4  -4    4.16    1.28
  -6  -4  -4    5.13    1.33
   6  -4   4    5.62    2.00
  -6   4  -4    5.71    1.65
  -6   4  -4    4.01    1.85
   8  -4   4   11.84    2.30
   8  -4   4   13.88    2.26
  -8  -4  -4   10.47    1.69
  -8  -4  -4   12.78    1.71
  -8   4  -4    8.10    1.78
  -8   4  -4   10.25    2.06
  10  -4   4   63.26    3.78
 -10  -4  -4   65.35    3.31
  10  -4   4   57.51    3.77
 -10  -4  -4   60.97    3.16
 -10   4  -4   59.59    3.72
 -10   4  -4   54.34    3.33
  12  -4   4   17.87    2.69
  12  -4   4   20.43    2.51
 -12  -4  -4   16.35    2.17
 -12  -4  -4   20.37    2.61
 -12   4  -4   19.45    2.56
 -12   4  -4   21.31    2.54
  14  -4   4   -0.58    1.90
  14  -4   4    0.05    1.95
 -14  -4  -4   -2.46    1.60
 -14  -4  -4   -0.07    1.81
 -14   4  -4   -0.45    1.80
 -14   4  -4   -0.82    1.81
  16  -4   4    2.09    2.21
  16  -4   4    5.15    2.39
 -16  -4  -4    0.22    1.70
 -16  -4  -4    1.61    2.00
 -16   4  -4    0.27    1.97
 -16   4  -4    3.16    2.02
 -18  -4  -4    1.11    2.10
 -18  -4  -4   -0.64    2.06
  18  -4   4    2.26    2.57
  18  -4   4    2.99    2.47
 -18   4  -4   -4.94    1.85
 -18   4  -4    0.45    2.18
  20  -4   4    8.13    2.62
 -20  -4  -4    2.85    2.39
 -20  -4  -4    3.00    2.40
  20  -4   4    1.52    2.63
 -20   4  -4    2.78    2.54
 -20   4  -4    1.69    2.30
  22  -4   4   -1.94    2.56
 -22  -4  -4    0.98    2.46
 -22  -4  -4   -1.58    2.23
  22  -4   4    2.63    2.49
 -22   4  -4    4.29    2.53
 -22   4  -4   -0.18    2.30
  24  -4   4    5.55    2.89
 -24  -4  -4    9.12    2.95
  24  -4   4    7.37    3.00
 -24  -4  -4    3.24    2.67
 -24   4  -4   11.58    3.03
 -24   4  -4    9.77    2.94
 -26  -4  -4   13.26    3.31
  26  -4   4   20.20    3.41
 -26  -4  -4    8.18    3.08
  26  -4   4   13.60    3.33
 -26   4  -4   10.25    3.16
 -26   4  -4    9.34    2.99
  28  -4   4    3.34    2.94
 -28  -4  -4    3.53    2.99
 -28  -4  -4    2.51    2.92
  28  -4   4    2.68    3.02
 -28   4  -4    1.37    3.10
 -28   4  -4    0.34    2.76
  30  -4   4   29.53    4.39
 -30  -4  -4   23.22    3.79
 -30  -4  -4   25.66    4.17
 -30   4  -4   23.74    3.83
 -30   4  -4   21.91    4.18
 -32  -4  -4    7.70    3.52
 -32  -4  -4    4.15    3.48
 -32   4  -4    4.77    3.38
 -32   4  -4    3.54    3.27
 -34  -4  -4   -3.56    3.22
 -34  -4  -4    4.80    3.55
 -34   4  -4   -1.56    3.35
 -34   4  -4   -3.31    3.03
 -36  -4  -4    0.07    3.58
 -36  -4  -4   -2.67    3.22
 -36   4  -4    0.07    3.29
 -36   4  -4    5.61    3.95
  41  -5  -4    4.63    3.28
  41  -5  -4    2.40    3.52
 -41  -5   4    2.21    3.41
 -41  -5   4   -3.12    3.45
 -41   5   4   -0.28    3.26
 -41   5   4   -3.90    2.89
  39  -5  -4   -4.93    3.06
 -39  -5   4    3.23    3.24
  39   5  -4    1.39    3.28
 -39   5   4    0.50    3.00
 -39   5   4    1.54    3.07
  37  -5  -4    2.21    3.28
 -37  -5   4    1.51    3.08
 -37   5   4    0.17    2.93
 -37   5   4    2.18    2.99
  37   5  -4    0.43    3.16
 -35  -5   4    1.65    2.96
  35  -5  -4   -2.07    3.18
  35   5  -4    2.09    3.10
 -35   5   4    6.52    2.87
 -35   5   4    3.33    2.89
  33  -5  -4    2.31    2.85
 -33  -5   4    4.22    3.08
 -33   5   4   -1.86    2.56
  33   5  -4   -1.30    2.62
 -33   5   4    0.92    2.55
 -31  -5   4   32.47    4.11
  31  -5  -4   28.63    3.96
  31   5  -4   26.69    4.05
 -31   5   4   23.84    3.47
 -31   5   4   29.44    3.90
  31   5  -4   25.58    3.98
  29  -5  -4    0.52    2.60
 -29  -5   4   -0.30    2.43
  29   5  -4    1.12    2.72
  29   5  -4    1.79    2.76
 -29   5   4    5.37    2.50
 -29   5   4    1.01    2.41
  27  -5  -4   51.99    4.42
 -27  -5   4   40.60    4.35
 -27   5   4   53.40    4.03
  27   5  -4   53.41    4.60
 -27   5   4   45.27    3.97
  27   5  -4   45.83    4.50
  25  -5  -4    6.05    2.77
 -25  -5   4   -0.70    2.18
 -25   5   4    2.83    2.28
  25   5  -4    3.96    2.83
  25   5  -4    1.72    2.27
 -25   5   4    3.35    2.14
 -23  -5   4   24.13    3.29
  23  -5  -4   21.91    3.09
 -23   5   4   26.65    3.03
  23   5  -4   19.88    3.05
  23   5  -4   23.89    3.54
 -21  -5   4   17.60    2.89
  21   5  -4   17.91    3.19
 -21   5   4   18.47    2.49
  21   5  -4   26.32    3.12
 -19  -5   4   13.78    1.61
  19   5  -4   14.18    2.56
 -19   5   4   13.72    2.15
  19   5  -4   17.26    3.03
 -17  -5   4    8.87    1.55
  17   5  -4    7.16    2.69
 -17   5   4   10.73    1.83
  17   5  -4    9.61    2.24
 -15  -5   4   19.26    2.25
  15   5  -4   16.09    2.37
 -15   5   4   20.53    2.16
  15   5  -4   20.31    3.13
 -13  -5   4   39.58    2.59
  13   5  -4   33.38    3.53
  13   5  -4   35.91    2.93
 -13   5   4   36.88    2.21
 -11  -5   4   11.00    1.85
  11   5  -4   11.48    2.77
  11   5  -4   12.56    2.01
 -11   5   4   16.48    1.76
  -9  -5   4    3.13    1.63
   9   5  -4    4.34    1.60
   9   5  -4    0.19    1.30
  -9   5   4    0.28    1.03
  -7  -5   4   20.35    2.92
   7   5  -4   16.88    2.22
  -7   5   4   18.69    1.49
   7   5  -4   17.53    2.07
  -5  -5   4   25.05    3.01
   5   5  -4   27.15    2.40
   5   5  -4   30.70    2.35
   5   5  -4   27.46    1.78
  -3  -5   4    5.44    1.98
   3   5  -4    3.41    1.39
   3   5  -4    4.76    1.54
   3   5  -4    3.33    1.79
   3   5  -4    3.35    1.25
  -1  -5   4   51.81    3.00
   1  -5  -4   51.75    1.50
  -1  -5   4   48.13    3.60
   1   5  -4   51.83    2.46
   1   5  -4   43.37    2.59
   1   5  -4   54.80    2.74
   1   5  -4   46.67    2.98
  -1  -5  -4    8.41    1.18
   1  -5   4    7.79    1.90
  -1  -5  -4    8.38    0.95
   1  -5   4    8.39    2.33
  -1   5  -4   10.36    1.63
  -1   5  -4    9.98    2.03
  -1   5  -4    9.28    1.57
  -3  -5  -4   13.72    1.46
  -3  -5  -4   12.11    1.64
   3  -5   4   16.62    2.23
   3  -5   4   14.81    2.56
  -3   5  -4   12.73    1.76
  -3   5  -4   12.49    1.79
  -3   5  -4   11.00    2.00
  -5  -5  -4   26.90    2.12
  -5  -5  -4   25.28    1.88
   5  -5   4   30.95    2.82
   5  -5   4   25.49    3.03
  -5   5  -4   27.05    2.58
  -5   5  -4   27.81    2.99
   7  -5   4   21.95    2.58
   7  -5   4   26.04    3.22
  -7  -5  -4   26.11    2.17
  -7  -5  -4   25.12    2.11
  -7   5  -4   21.56    2.46
  -7   5  -4   22.10    2.72
   9  -5   4   30.61    3.67
  -9  -5  -4   22.40    2.35
   9  -5   4   25.86    2.80
  -9  -5  -4   21.26    2.24
  -9   5  -4   28.60    3.20
  -9   5  -4   23.61    2.58
  11  -5   4    4.03    2.40
  11  -5   4    5.64    2.31
 -11  -5  -4   10.63    1.92
 -11  -5  -4    6.59    1.68
 -11   5  -4    8.19    1.96
 -11   5  -4    6.98    2.28
  13  -5   4    1.76    2.37
 -13  -5  -4    2.34    1.65
 -13  -5  -4    3.95    1.92
  13  -5   4   -1.90    2.17
 -13   5  -4   -2.51    1.65
 -13   5  -4    3.97    2.00
  15  -5   4   14.79    3.08
 -15  -5  -4   17.41    2.55
 -15  -5  -4   17.37    2.47
  15  -5   4   15.35    2.80
 -15   5  -4   12.70    2.56
 -15   5  -4   14.35    2.54
  17  -5   4   52.02    4.32
  17  -5   4   53.23    4.26
 -17  -5  -4   46.96    3.68
 -17  -5  -4   41.69    3.89
 -17   5  -4   39.80    3.69
 -17   5  -4   43.01    3.78
  19  -5   4    3.49    2.65
 -19  -5  -4    2.45    2.43
  19  -5   4    1.52    2.66
 -19  -5  -4    1.23    2.15
 -19   5  -4    2.99    2.39
 -19   5  -4    2.90    2.44
 -21  -5  -4    1.80    2.35
  21  -5   4    1.38    2.60
  21  -5   4    1.88    2.59
 -21  -5  -4    4.41    2.59
 -21   5  -4    0.69    2.65
 -21   5  -4    3.62    2.54
 -23  -5  -4    6.50    2.74
  23  -5   4    3.22    3.06
 -23  -5  -4    6.89    2.89
  23  -5   4    7.19    3.10
 -23   5  -4    6.86    3.01
 -23   5  -4    5.88    2.77
  25  -5   4    1.15    3.02
 -25  -5  -4    6.16    2.81
 -25  -5  -4    3.77    2.89
  25  -5   4    2.92    2.98
 -25   5  -4    5.24    3.13
 -25   5  -4    5.26    2.83
  27  -5   4   -4.51    2.84
 -27  -5  -4    3.01    2.82
 -27  -5  -4    2.19    2.96
  27  -5   4   -2.29    2.83
 -27   5  -4   -1.79    2.90
 -27   5  -4    0.34    2.64
  29  -5   4    8.39    3.45
 -29  -5  -4    6.49    3.18
  29  -5   4   10.25    3.48
 -29  -5  -4    4.85    3.33
 -29   5  -4    9.15    3.34
 -29   5  -4    4.88    3.03
  31  -5   4    0.17    3.17
 -31  -5  -4    0.11    2.76
  31  -5   4    1.40    3.24
 -31  -5  -4   -3.93    2.91
 -31   5  -4    0.42    3.05
 -31   5  -4   -3.33    3.02
 -33  -5  -4   -2.50    3.08
 -33  -5  -4    3.12    3.46
  33  -5   4   -0.90    3.30
 -33   5  -4    5.65    3.27
 -33   5  -4   -0.44    3.41
 -35  -5  -4    0.56    3.48
 -35  -5  -4    1.52    3.43
 -35   5  -4    1.05    3.15
 -35   5  -4   -2.02    3.46
 -40  -6   4   -2.62    3.47
  40  -6  -4    0.36    3.22
  40  -6  -4    3.85    3.79
 -40  -6   4    2.86    3.41
 -40   6   4    0.07    3.09
  40   6  -4    2.36    3.63
 -40   6   4    4.09    3.29
 -38  -6   4    5.01    3.74
  38  -6  -4   -0.21    3.53
 -38   6   4    3.45    2.98
 -38   6   4    0.30    3.07
  38   6  -4   -1.46    3.30
 -36  -6   4    9.25    3.81
  36  -6  -4    9.07    3.77
 -36   6   4    6.18    3.22
  36   6  -4   12.12    3.80
 -36   6   4    9.64    3.27
 -34  -6   4   15.38    3.63
  34   6  -4   11.05    3.33
 -34   6   4   13.92    3.19
 -34   6   4   16.75    3.53
 -32  -6   4   -0.81    2.92
 -32   6   4   -2.04    2.34
  32   6  -4    0.20    2.95
 -32   6   4   -3.55    2.32
  32   6  -4   -0.45    2.94
 -30  -6   4    5.21    3.02
 -30   6   4    1.08    2.35
 -30   6   4    1.47    2.62
  30   6  -4    1.82    2.68
  30   6  -4    1.01    2.80
 -28  -6   4   -0.25    2.71
  28   6  -4    0.53    2.72
  28   6  -4    2.22    2.93
 -28   6   4    2.91    2.56
 -28   6   4    2.29    2.26
 -26  -6   4   29.81    4.15
  26   6  -4   36.79    4.60
 -26   6   4   37.94    3.58
  26   6  -4   28.12    3.98
 -26   6   4   34.83    3.56
 -24  -6   4    8.76    2.89
  24   6  -4   12.31    3.39
 -24   6   4   13.25    2.44
 -24   6   4    6.66    2.32
  24   6  -4   10.50    2.63
 -22  -6   4    2.67    2.49
  22   6  -4    0.12    2.27
 -22   6   4    0.23    1.89
  22   6  -4   -0.93    2.47
 -22   6   4    0.27    1.96
 -20   6   4    3.77    1.80
 -20   6   4    3.90    1.92
  20   6  -4    4.31    2.16
  20   6  -4    3.50    2.78
  18   6  -4   35.27    3.46
 -18   6   4   42.35    3.02
 -18   6   4   39.45    2.89
  18   6  -4   31.92    4.20
 -16  -6   4    1.55    1.53
  16   6  -4    3.28    1.95
 -16   6   4    3.68    1.53
 -16   6   4    0.69    1.49
  16   6  -4    2.67    2.63
 -14  -6   4  106.18    3.88
  14   6  -4  108.10    4.52
 -14   6   4  107.28    3.69
 -14   6   4  108.24    3.52
  14   6  -4  111.66    5.67
 -12  -6   4    0.72    1.62
  12   6  -4    2.81    2.47
  12   6  -4    0.55    1.71
 -12   6   4    2.76    1.08
 -12   6   4    2.01    1.26
 -10  -6   4   25.91    2.69
 -10   6   4   28.58    2.04
  10   6  -4   29.35    2.62
  10   6  -4   30.08    2.57
 -10   6   4   30.88    1.60
  10   6  -4   31.84    3.58
  -8  -6   4   40.34    3.14
   8   6  -4   38.15    2.53
  -8   6   4   43.22    2.07
   8   6  -4   39.86    2.90
   8   6  -4   47.24    3.84
  -6  -6   4    4.13    1.95
   6   6  -4    4.72    1.46
   6   6  -4    4.93    1.65
   6   6  -4    4.66    2.35
  -4  -6   4    0.56    1.87
   4   6  -4   -0.27    1.17
   4   6  -4    2.29    1.47
  -2  -6   4    0.04    2.00
   2   6  -4   -0.87    1.28
   2   6  -4    1.24    1.25
   2   6  -4    1.02    1.75
   0  -6   4   12.79    2.57
   0  -6   4    8.34    1.94
   0   6  -4   10.36    2.11
   0   6  -4   11.88    1.70
   0   6  -4   10.76    1.60
  -2  -6  -4    0.62    0.71
   2  -6   4    0.19    1.87
  -2  -6  -4   -1.18    1.04
   2  -6   4    2.43    1.84
  -2   6  -4    0.40    1.59
  -2   6  -4    3.30    1.41
  -4  -6  -4   47.58    2.01
   4  -6   4   55.29    3.53
   4  -6   4   48.25    3.80
  -4  -6  -4   48.51    2.50
  -4   6  -4   46.98    3.20
  -4   6  -4   52.07    2.89
   6  -6   4   24.79    2.87
  -6  -6  -4   20.92    1.84
   6  -6   4   23.06    3.20
  -6  -6  -4   25.45    2.23
  -6   6  -4   17.45    2.58
  -6   6  -4   25.11    2.52
  -8  -6  -4   37.68    2.33
  -8  -6  -4   39.35    2.70
   8  -6   4   45.69    3.68
   8  -6   4   37.55    3.69
  -8   6  -4   42.00    2.88
  -8   6  -4   39.69    3.52
 -10  -6  -4   14.85    2.06
  10  -6   4   12.00    2.44
  10  -6   4   11.80    2.71
 -10  -6  -4   11.73    1.87
 -10   6  -4   12.12    2.16
 -10   6  -4   11.86    2.54
 -12  -6  -4   76.84    3.58
 -12  -6  -4   71.79    3.72
  12  -6   4   71.92    4.63
  12  -6   4   76.82    4.31
 -12   6  -4   71.98    3.88
 -12   6  -4   78.10    4.48
 -14  -6  -4   11.35    2.29
 -14  -6  -4   10.39    2.14
  14  -6   4    8.66    2.84
  14  -6   4   12.06    2.80
 -14   6  -4   11.04    2.67
 -14   6  -4    9.04    2.25
 -16  -6  -4   12.45    2.39
  16  -6   4    8.55    3.15
  16  -6   4   14.52    3.25
 -16  -6  -4   16.57    2.64
 -16   6  -4   11.24    2.47
 -16   6  -4   11.81    2.90
  18  -6   4   25.35    3.71
 -18  -6  -4   27.90    3.42
  18  -6   4   26.32    3.80
 -18  -6  -4   28.85    3.52
 -18   6  -4   28.52    3.58
 -18   6  -4   26.66    3.50
 -20  -6  -4   -3.57    2.19
  20  -6   4   -1.86    2.87
  20  -6   4    1.10    2.74
 -20  -6  -4    1.10    2.21
 -20   6  -4    1.75    2.35
 -20   6  -4    1.70    2.67
  22  -6   4   41.24    4.25
 -22  -6  -4   37.74    4.09
 -22  -6  -4   44.56    4.12
  22  -6   4   28.92    4.34
 -22   6  -4   39.58    4.13
 -22   6  -4   42.01    4.45
 -24  -6  -4    2.11    2.65
 -24  -6  -4    1.78    2.73
  24  -6   4    3.38    3.15
  24  -6   4    9.78    3.41
 -24   6  -4    4.32    2.98
 -24   6  -4   -0.67    2.23
  26  -6   4    4.28    3.24
  26  -6   4    4.61    3.44
 -26  -6  -4    3.17    2.84
 -26  -6  -4    6.59    3.12
 -26   6  -4    6.70    3.22
 -26   6  -4    2.06    2.68
  28  -6   4   -3.10    3.12
 -28  -6  -4   -1.61    2.88
 -28  -6  -4    2.90    2.94
  28  -6   4   -3.93    3.02
 -28   6  -4   -1.49    2.93
 -28   6  -4   -1.01    2.64
 -30  -6  -4    2.89    3.12
  30  -6   4    0.43    3.39
 -30  -6  -4    5.26    3.34
  30  -6   4   -0.03    3.36
 -30   6  -4   -0.95    3.23
 -30   6  -4    1.11    2.92
  32  -6   4   13.63    4.13
  32  -6   4   11.18    3.79
 -32  -6  -4   13.28    3.83
 -32  -6  -4    6.21    3.64
 -32   6  -4   18.77    4.03
 -32   6  -4   10.74    3.97
  34  -6   4    3.03    3.77
 -34  -6  -4    2.87    3.40
 -34  -6  -4    1.73    3.55
 -34   6  -4    0.24    3.17
 -34   6  -4   -2.42    3.42
 -39  -7   4   -0.71    3.56
 -39  -7   4    3.10    3.43
  39  -7  -4    0.30    3.41
 -39   7   4    3.12    3.24
  39   7  -4    4.26    3.47
 -37  -7   4    0.42    3.45
 -37   7   4    3.69    3.24
  37   7  -4   -0.81    3.11
 -35  -7   4   -3.63    3.14
 -35   7   4   -0.06    2.72
  35   7  -4    0.56    3.07
 -33  -7   4    0.08    3.15
  33   7  -4   -2.37    2.93
 -33   7   4    2.94    2.70
 -31  -7   4   -1.53    2.74
 -31   7   4   -1.44    2.39
  31   7  -4    4.57    3.06
  31   7  -4   -1.40    3.04
 -29  -7   4   12.88    3.24
 -29   7   4    7.68    2.62
 -29   7   4   13.63    3.04
  29   7  -4   16.98    3.48
  29   7  -4    8.40    3.23
 -27  -7   4    4.18    3.00
 -27   7   4    6.79    2.42
 -27   7   4    2.41    2.47
  27   7  -4    3.51    3.30
  27   7  -4    4.93    2.70
 -25  -7   4    2.02    2.78
 -25   7   4    6.85    2.32
  25   7  -4    1.88    3.17
 -25   7   4    9.96    2.55
  25   7  -4    2.57    2.68
 -23  -7   4   57.96    4.68
 -23   7   4   59.18    3.77
  23   7  -4   55.28    4.34
  23   7  -4   59.88    5.19
 -23   7   4   55.00    3.85
 -21   7   4   54.07    3.37
 -21   7   4   49.18    3.46
  21   7  -4   49.26    4.11
  21   7  -4   47.21    4.94
 -19   7   4    5.58    1.97
  19   7  -4    6.00    2.39
  19   7  -4    4.72    3.10
 -19   7   4    5.19    1.77
  17   7  -4   12.13    2.53
 -17   7   4   11.64    2.03
 -17   7   4   11.25    1.83
  17   7  -4   13.31    3.19
 -15  -7   4   27.61    2.86
  15   7  -4   27.57    3.86
 -15   7   4   29.87    2.47
  15   7  -4   24.78    3.02
 -13  -7   4   29.04    2.93
  13   7  -4   24.89    3.66
 -13   7   4   32.14    2.44
  13   7  -4   32.13    3.04
 -11  -7   4   40.10    3.12
  11   7  -4   32.77    4.30
 -11   7   4   39.85    2.45
  11   7  -4   44.67    3.18
  -9  -7   4   -0.05    1.93
   9   7  -4    5.81    2.73
   9   7  -4    5.36    1.75
  -9   7   4    2.51    1.23
  -7  -7   4    9.07    2.43
   7   7  -4   10.18    2.67
   7   7  -4   11.77    1.76
   7   7  -4   11.43    1.93
  -5  -7   4    3.91    2.13
   5   7  -4    6.58    1.68
   5   7  -4    5.28    2.49
   5   7  -4    6.50    1.59
  -3  -7   4   15.34    2.55
   3   7  -4    8.96    2.78
   3   7  -4   13.97    1.89
   3   7  -4   10.68    1.61
  -1  -7   4   85.20    4.75
   1   7  -4   87.61    4.93
   1   7  -4   79.55    4.16
   1   7  -4   85.63    3.27
   1   7  -4   82.80    3.51
   1  -7   4    2.00    2.39
  -1   7  -4   -0.03    1.44
  -1   7  -4   -3.05    1.76
  -1   7  -4    0.85    1.26
  -1   7  -4   -0.86    2.28
  -3  -7  -4   91.48    3.26
   3  -7   4   88.19    4.78
  -3   7  -4   89.38    4.39
  -3   7  -4   94.81    3.58
  -3   7  -4   87.07    4.73
  -3   7  -4   85.58    3.60
   5  -7   4   41.80    4.00
  -5  -7  -4   45.64    2.62
  -5   7  -4   39.83    4.02
  -5   7  -4   43.18    2.86
  -5   7  -4   46.74    3.60
   7  -7   4   47.98    4.15
  -7  -7  -4   41.13    2.76
  -7   7  -4   42.65    2.90
  -7   7  -4   35.53    3.26
  -7   7  -4   34.86    3.77
   9  -7   4   56.88    4.49
  -9  -7  -4   61.01    3.25
  -9   7  -4   65.87    3.60
  -9   7  -4   60.71    4.11
  -9   7  -4   61.91    4.03
  11  -7   4   -1.21    2.51
 -11  -7  -4    6.97    1.87
 -11   7  -4    3.46    1.90
 -11   7  -4    0.59    2.32
 -11   7  -4    3.28    2.26
 -13  -7  -4    5.33    2.02
  13  -7   4    4.97    3.00
 -13  -7  -4    5.77    1.72
 -13   7  -4    6.15    2.05
 -13   7  -4   11.16    2.81
  15  -7   4    1.70    2.76
 -15  -7  -4    0.66    1.75
 -15  -7  -4   -1.18    2.00
 -15   7  -4   -0.95    1.86
 -15   7  -4    4.77    2.58
 -17  -7  -4    6.83    2.24
 -17  -7  -4    4.67    2.30
  17  -7   4    6.54    3.04
 -17   7  -4    3.18    2.47
 -17   7  -4   -0.85    2.05
 -19  -7  -4   27.05    3.85
  19  -7   4   19.69    3.75
 -19  -7  -4   18.57    2.82
 -19   7  -4   27.05    3.69
 -19   7  -4   22.74    3.65
  21  -7   4    6.58    3.18
 -21  -7  -4    7.75    2.67
 -21  -7  -4    5.61    2.91
 -21   7  -4    1.71    2.37
 -21   7  -4    4.56    2.96
 -23  -7  -4   12.84    2.99
  23  -7   4   20.46    4.24
 -23  -7  -4   16.83    3.48
 -23   7  -4   13.32    3.57
 -23   7  -4   11.07    2.94
  25  -7   4   55.35    5.19
  25  -7   4   53.07    5.24
 -25  -7  -4   38.67    4.32
 -25  -7  -4   53.41    5.07
 -25   7  -4   61.69    5.33
 -25   7  -4   57.98    4.76
  27  -7   4    2.00    3.42
 -27  -7  -4   -1.49    2.94
  27  -7   4   -0.07    3.27
 -27   7  -4    3.16    2.90
 -27   7  -4    3.13    3.17
  29  -7   4   16.18    4.29
 -29  -7  -4   10.87    3.59
  29  -7   4   10.24    3.90
 -29   7  -4    9.92    3.39
 -29   7  -4   10.11    3.50
  31  -7   4    8.17    4.00
 -31  -7  -4   -1.02    3.26
  31  -7   4    9.12    4.23
 -31   7  -4   10.10    3.60
 -31   7  -4    5.55    3.68
 -36  -8   4   34.58    5.10
  36   8  -4   30.49    4.55
 -34  -8   4   13.66    3.99
  34   8  -4   12.78    3.41
 -32  -8   4    7.04    3.56
  32   8  -4    8.00    3.33
 -30  -8   4   23.21    4.11
  30   8  -4   22.90    3.96
  30   8  -4   37.76    5.06
 -28  -8   4   18.87    3.75
  28   8  -4   24.45    3.81
  28   8  -4   12.62    3.88
 -26  -8   4   -3.75    2.71
  26   8  -4   -1.06    2.62
  26   8  -4    3.20    3.17
 -24  -8   4    7.93    3.08
  24   8  -4   13.86    3.59
  24   8  -4    9.41    2.92
 -22  -8   4    6.83    2.85
  22   8  -4    9.31    2.71
  22   8  -4    6.86    3.46
  20   8  -4   13.47    3.47
  20   8  -4    7.70    2.59
  18   8  -4    8.17    2.45
  18   8  -4    6.95    3.16
  16   8  -4   36.87    4.36
  16   8  -4   30.16    3.32
 -14  -8   4   27.68    3.31
  14   8  -4   21.96    2.92
  14   8  -4   22.82    3.68
 -12  -8   4   33.88    3.40
  12   8  -4   36.98    3.32
  12   8  -4   41.80    4.67
 -10  -8   4   34.61    3.38
  10   8  -4   38.71    4.20
  10   8  -4   38.10    3.12
  -8  -8   4   56.90    4.05
   8   8  -4   57.35    4.54
   8   8  -4   57.88    3.34
  -6  -8   4   13.32    2.71
   6   8  -4    9.97    1.99
   6   8  -4   12.20    1.77
   6   8  -4    8.79    3.05
  -4  -8   4   95.16    4.99
   4   8  -4   94.41    3.80
   4   8  -4   92.90    3.49
   4   8  -4   93.58    5.44
  -2  -8   4   56.29    4.46
   2   8  -4   61.82    3.22
   2   8  -4   60.82    4.77
   2   8  -4   58.50    2.89
   0  -8   4   -1.09    2.28
   0   8  -4   -1.43    1.32
   0   8  -4    0.73    2.00
   0   8  -4    0.97    1.52
   0   8  -4    2.07    2.49
   2  -8   4    7.34    2.95
  -2   8  -4    8.16    1.85
  -2   8  -4    6.07    1.71
  -2   8  -4    4.20    2.65
  -2   8  -4    7.94    2.47
   4  -8   4    9.85    2.94
  -4   8  -4    7.88    1.80
  -4   8  -4   13.15    2.61
  -4   8  -4   12.93    1.94
  -4   8  -4    6.37    2.61
   6  -8   4   35.37    4.14
  -6   8  -4   33.39    2.76
  -6   8  -4   32.63    3.62
  -6   8  -4   35.58    3.78
   8  -8   4   11.46    3.30
  -8   8  -4    6.15    2.53
  -8   8  -4    9.91    2.65
  -8   8  -4    6.96    1.90
  10  -8   4   14.22    3.41
 -10   8  -4   20.11    2.90
 -10   8  -4   17.26    3.00
 -10   8  -4   20.04    2.81
  12  -8   4   58.60    4.95
 -12   8  -4   67.61    3.88
 -12   8  -4   66.48    4.60
  14  -8   4    2.85    3.02
 -14   8  -4    8.18    2.68
 -14   8  -4    7.83    2.29
  16  -8   4   19.80    3.78
 -16   8  -4   14.93    2.78
 -16   8  -4   17.87    3.33
  18  -8   4   47.21    4.88
 -18   8  -4   44.78    4.03
 -18   8  -4   47.75    4.29
  20  -8   4   12.72    3.98
 -20   8  -4    9.17    3.29
 -20   8  -4   11.70    2.78
  22  -8   4   10.16    3.90
 -22   8  -4   15.77    3.05
 -22   8  -4   12.36    3.47
  24  -8   4   16.17    4.07
 -24   8  -4   18.42    3.72
  26  -8   4    3.84    3.89
 -26   8  -4    1.20    3.16
  28  -8   4   -7.41    3.29
 -28   8  -4    3.92    3.50
  30  -8   4   11.82    4.46
 -30   8  -4    2.07    3.58
 -33  -9   4   -0.16    3.44
  33   9  -4    1.92    3.03
 -31  -9   4    5.81    3.62
  31   9  -4    3.52    3.08
 -29  -9   4   13.93    3.75
  29   9  -4   19.08    4.39
  29   9  -4   19.00    3.71
 -27  -9   4    6.77    3.34
  27   9  -4    9.30    3.89
  27   9  -4    1.20    2.91
 -25  -9   4    7.29    3.25
  25   9  -4    6.32    2.91
  25   9  -4    3.34    3.62
 -23  -9   4   55.24    4.89
  23   9  -4   61.13    4.84
  23   9  -4   49.93    5.67
  21   9  -4   29.07    4.74
  21   9  -4   38.79    4.06
  19   9  -4    6.15    2.52
  19   9  -4    6.64    3.59
  17   9  -4   27.79    4.52
  17   9  -4   25.24    3.25
  15   9  -4   45.52    3.71
  15   9  -4   46.58    4.84
  13   9  -4    0.80    2.80
  13   9  -4    0.23    1.99
 -11  -9   4   11.78    2.84
  11   9  -4    9.87    3.25
  -9  -9   4   15.55    2.96
   9   9  -4   14.32    3.43
  -7  -9   4   44.48    4.17
   7   9  -4   34.44    4.69
  -5  -9   4    6.32    2.74
   5   9  -4    6.41    3.19
  -3  -9   4   54.95    4.61
   3   9  -4   57.18    4.92
  -1  -9   4   62.86    4.95
   1   9  -4   65.70    5.00
   1  -9   4    0.61    2.80
  -1   9  -4    1.96    2.66
  -1   9  -4    2.98    2.28
   3  -9   4    7.66    2.95
  -3   9  -4    9.22    3.03
  -3   9  -4   10.13    2.69
   5  -9   4   21.33    3.67
  -5   9  -4   26.40    3.79
  -5   9  -4   20.88    3.10
   7  -9   4   -2.87    2.87
  -7   9  -4    3.53    2.62
  -7   9  -4   -4.57    2.13
   9  -9   4    2.40    2.87
  -9   9  -4    8.07    2.67
  -9   9  -4    4.32    2.49
  11  -9   4   57.19    5.52
 -11   9  -4   59.61    4.63
  13  -9   4    1.00    3.07
 -13   9  -4    7.72    2.86
  15  -9   4   22.71    4.21
 -15   9  -4   32.33    4.10
  17  -9   4   15.79    4.18
 -17   9  -4   27.09    3.82
  19  -9   4   10.99    3.78
 -19   9  -4    8.87    3.08
  21  -9   4   -0.34    3.53
 -21   9  -4    2.38    2.90
  23  -9   4   11.59    3.91
 -23   9  -4    6.92    3.39
  25  -9   4   15.13    4.52
 -25   9  -4    3.45    3.49
  27  -9   4   -0.52    3.79
 -27   9  -4   -0.43    3.23
  30 -10  -4   10.67    3.80
 -30 -10   4    4.95    3.45
 -28 -10   4   48.93    5.28
 -26 -10   4    4.04    3.20
  26  10  -4    5.11    3.90
 -24 -10   4   41.52    4.83
  24  10  -4   44.50    5.22
 -22 -10   4   88.57    5.68
  22  10  -4   87.18    6.73
  20  10  -4   20.26    4.49
  18  10  -4   14.10    3.93
  16  10  -4   82.66    5.97
  14  10  -4   19.19    4.09
  12  10  -4    6.13    3.25
 -10 -10   4   16.77    3.27
  10  10  -4   14.37    3.85
  -8 -10   4   17.55    3.50
   8  10  -4   22.15    3.99
  -6 -10   4    4.43    2.84
   6  10  -4    7.68    3.21
  -4 -10   4   13.79    3.25
   4  10  -4   15.79    3.49
  -2 -10   4   71.26    5.22
   2  10  -4   71.19    5.49
   0 -10   4   31.05    4.56
   0  10  -4   31.48    4.46
   2 -10   4    7.99    3.47
  -2  10  -4    7.71    3.22
   4 -10   4   41.48    5.06
  -4  10  -4   31.38    3.80
  -4  10  -4   38.44    4.66
   6 -10   4   16.79    3.95
  -6  10  -4   16.93    3.19
  -6  10  -4   16.37    3.39
   8 -10   4    5.49    3.51
  -8  10  -4    5.98    2.89
  -8  10  -4    7.56    2.84
  10 -10   4   67.10    5.90
 -10  10  -4   68.50    5.04
  12 -10   4   52.34    5.69
 -12  10  -4   49.26    4.51
  14 -10   4   -0.43    3.60
 -14  10  -4   -1.70    2.54
  16 -10   4   11.87    4.25
 -16  10  -4   12.46    3.27
  18 -10   4   22.22    4.47
 -18  10  -4   25.89    4.04
  20 -10   4    0.36    3.71
 -20  10  -4    0.57    3.06
  22 -10   4    1.91    3.86
 -22  10  -4    4.32    3.22
  24 -10   4   24.84    5.19
 -24  10  -4   18.71    4.10
  27 -11  -4    6.80    3.79
 -27 -11   4    3.79    3.56
 -25 -11   4    4.58    3.66
  25 -11  -4    5.47    4.06
  25  11  -4    4.39    3.91
 -23 -11   4    7.52    3.42
  23  11  -4    5.21    3.79
  21  11  -4   14.12    4.47
  19  11  -4    2.26    3.78
  17  11  -4    7.65    3.62
  15  11  -4   45.68    5.57
  13  11  -4   22.42    4.56
  11  11  -4   16.47    4.00
   9  11  -4   88.31    6.11
  -7 -11   4   -2.12    3.08
   7  11  -4    1.92    3.01
  -5 -11   4   17.56    3.70
   5  11  -4   31.29    4.75
   3 -11  -4   49.64    4.81
  -3 -11   4   48.70    4.95
   3  11  -4   39.04    4.56
   1 -11  -4    3.68    2.93
  -1 -11   4    3.60    3.32
   1  11  -4    3.42    2.93
   1 -11   4   -1.28    3.12
  -1  11  -4    1.73    3.02
   3 -11   4   12.80    3.92
  -3  11  -4   15.57    3.56
   5 -11   4   43.49    5.50
  -5  11  -4   39.77    4.58
  -5  11  -4   41.58    4.20
   7 -11   4    4.17    3.67
  -7  11  -4    4.85    2.79
   9 -11   4    4.43    3.91
  -9  11  -4    9.33    3.06
  11 -11   4   36.12    5.08
 -11  11  -4   33.62    4.32
  13 -11   4   33.76    5.26
 -13  11  -4   31.34    4.23
  15 -11   4    1.82    3.65
 -15  11  -4    0.34    2.88
  17 -11   4   33.71    5.48
 -17  11  -4   50.16    4.88
  19 -11   4    7.87    4.38
 -19  11  -4   10.43    3.49
  21 -11   4    3.13    4.19
 -21  11  -4    1.52    3.13
  22 -12  -4   18.02    4.50
  20 -12  -4   22.76    4.85
  20  12  -4   16.58    4.61
  18 -12  -4   18.52    4.53
  18  12  -4   21.83    4.87
  16 -12  -4   23.76    4.73
  16  12  -4   18.09    4.68
  14 -12  -4   -0.79    3.48
  14  12  -4   -0.89    3.24
  12 -12  -4   13.10    3.93
  12  12  -4   11.47    4.18
  10 -12  -4   26.00    4.43
  10  12  -4   26.14    4.82
   8 -12  -4    2.42    3.36
   8  12  -4   -0.79    3.39
   6 -12  -4    5.12    3.48
   6  12  -4   15.97    3.86
  -4 -12   4   -6.16    2.94
   4 -12  -4   -3.61    2.90
   4  12  -4   -0.24    3.32
  -2 -12   4   35.07    4.78
   2  12  -4   31.05    4.72
   0 -12   4   10.75    3.91
   0  12  -4   18.34    4.09
   2 -12   4   20.02    4.39
  -2  12  -4   14.50    3.78
   4 -12   4   49.13    5.78
  -4  12  -4   61.33    5.40
   6 -12   4   10.04    4.08
   8 -12   4    7.68    4.32
  10 -12   4   32.87    5.43
  12 -12   4   -0.33    4.00
  14 -12   4   -4.47    3.81
  16 -12   4    0.30    4.36
  15 -13  -4   12.65    4.46
  15  13  -4    4.78    3.83
  13 -13  -4   28.77    4.77
  13  13  -4   17.83    4.49
  11 -13  -4    9.25    4.18
  11  13  -4   13.38    4.36
   9 -13  -4   37.56    5.61
   9  13  -4   56.02    5.69
   7 -13  -4    4.79    3.60
   7  13  -4    3.26    3.73
   5  13  -4    4.09    3.75
   3  13  -4   24.01    4.61
  -1 -13   4    0.01    3.67
   1  13  -4   10.56    3.78
   1 -13   4   -3.71    3.61
  -1  13  -4    3.37    3.36
   3 -13   4    0.79    3.87
   5 -13   4   -3.24    3.75
   7 -13   4   -1.77    3.88
   9 -13   4    0.90    4.14
  44   0  -5   -1.14    2.62
 -44   0   5   -2.25    3.29
 -44   0   5   -0.23    3.46
 -42   0   5   -7.33    2.85
  42   0  -5   -0.44    2.62
 -40   0   5   -1.64    2.83
  40   0  -5   -0.38    2.87
  40   0  -5   -0.57    2.42
  38   0  -5   -2.07    2.43
  38   0  -5    3.49    3.03
 -38   0   5   -3.65    2.53
  36   0  -5   -0.17    2.39
  36   0  -5    1.66    2.96
 -36   0   5   -0.67    2.52
 -34   0   5   -3.59    2.29
  34   0  -5    0.88    2.57
  34   0  -5    0.49    2.28
 -32   0   5   -0.51    2.32
  32   0  -5    2.38    2.58
  32   0  -5    2.09    2.41
  30   0  -5    4.50    2.52
  30   0  -5   -1.70    2.03
 -30   0   5    2.27    2.45
 -28   0   5   -0.53    2.21
  28   0  -5    0.55    2.06
  28   0  -5   -0.17    2.37
  26   0  -5    3.60    1.64
 -26   0   5   -0.08    2.11
  26   0  -5   -0.60    2.18
  26   0  -5    2.46    2.07
 -24   0   5   -1.92    1.71
  24   0  -5    0.58    1.89
  24   0  -5   -0.13    1.80
  24   0  -5   -1.30    1.64
 -22   0   5    2.79    1.76
  22   0  -5    1.26    1.79
 -20   0   5   -0.52    1.57
  20   0  -5    3.14    1.93
 -18   0   5   -0.28    1.63
  18   0  -5   -3.44    1.69
 -16   0   5    1.64    1.47
  16   0  -5    2.64    1.83
 -14   0   5   -2.81    1.40
  14   0  -5    1.34    1.53
  12   0  -5    1.68    1.61
  12   0  -5    1.97    1.61
  10   0  -5    1.05    1.53
  10   0  -5    0.71    1.50
   8   0  -5   -0.05    1.34
   8   0  -5   -1.11    1.47
  -6   0   5    2.23    1.58
   6   0  -5    1.30    1.47
   6   0  -5   -0.09    1.35
   4   0  -5    1.68    1.33
  -4   0   5   -0.68    1.32
   4   0  -5   -0.36    1.16
   2   0  -5   -2.66    1.35
   2   0  -5   -0.65    1.22
  -2   0   5   -0.21    1.49
   0   0  -5    1.41    1.31
   0   0  -5   -0.91    1.31
   0   0   5    0.93    1.48
  -2   0  -5   -0.23    1.34
   2   0   5   -0.42    1.40
  -2   0  -5   -1.23    1.32
  -4   0  -5   -0.71    1.38
  -4   0  -5    0.32    1.40
   4   0   5   -1.49    1.34
   6   0   5   -1.59    1.38
  -6   0  -5   -1.09    1.36
  -6   0  -5   -0.96    1.51
   8   0   5    0.59    1.50
  -8   0  -5    1.90    1.54
  -8   0  -5    1.19    1.71
 -10   0  -5    1.76    1.62
  10   0   5    2.31    1.63
 -10   0  -5   -2.56    1.57
  12   0   5    0.32    1.56
 -12   0  -5    2.56    1.79
 -12   0  -5    0.24    1.85
 -14   0  -5   -1.09    1.59
 -14   0  -5   -1.24    1.81
  14   0   5   -0.22    1.58
 -16   0  -5   -0.28    1.84
  16   0   5   -1.35    1.57
 -16   0  -5    1.24    1.90
  18   0   5   -2.18    1.77
 -18   0  -5   -0.98    2.14
 -18   0  -5    1.03    1.99
 -20   0  -5    2.65    2.30
  20   0   5   -1.55    1.89
 -20   0  -5    0.72    2.17
 -22   0  -5   -5.29    2.19
 -22   0  -5    1.72    2.53
  22   0   5    2.21    1.99
 -24   0  -5   -0.36    2.37
 -24   0  -5   -3.12    2.20
 -26   0  -5   -1.03    2.49
 -26   0  -5    3.55    2.93
 -28   0  -5   -0.67    2.60
 -28   0  -5   -1.04    2.94
 -30   0  -5   -0.01    2.83
 -30   0  -5   -3.62    2.63
 -32   0  -5    1.44    2.96
 -32   0  -5   -1.25    3.26
 -34   0  -5   -1.29    3.31
 -34   0  -5   -1.08    3.37
 -36   0  -5    0.08    3.21
 -36   0  -5    1.39    3.43
 -45  -1   5    4.24    3.68
  45  -1  -5    7.68    3.32
 -45  -1   5    5.89    3.86
 -45   1   5    9.39    3.92
 -45   1   5    3.11    3.33
  43  -1  -5    3.80    2.95
 -43  -1   5    0.21    3.29
 -43   1   5    1.47    3.20
 -43   1   5    2.23    3.21
  43   1  -5    1.55    2.33
  41  -1  -5    3.44    2.84
 -41  -1   5    3.07    3.29
  41   1  -5    1.55    3.48
  41   1  -5    6.21    2.49
 -41   1   5    5.26    3.13
 -41   1   5    2.16    3.29
 -39  -1   5   12.37    3.70
  39  -1  -5    6.14    2.95
  39   1  -5    4.64    3.18
  39   1  -5   11.09    2.58
 -39   1   5    9.76    3.48
  37  -1  -5    0.13    2.65
  37  -1  -5    1.40    3.03
 -37  -1   5   -1.91    2.71
  37   1  -5    1.61    2.24
 -37   1   5    3.40    2.75
  37   1  -5   -0.62    2.94
  35  -1  -5   12.32    3.18
  35  -1  -5   10.50    2.94
 -35  -1   5    7.20    3.16
  35   1  -5    9.68    2.50
 -35   1   5   12.32    3.27
  35   1  -5    4.59    2.92
 -33  -1   5   19.76    3.32
  33  -1  -5   20.12    3.03
  33  -1  -5   24.80    3.74
  33   1  -5   25.24    3.23
 -33   1   5   22.72    3.44
  33   1  -5   12.60    3.40
  31  -1  -5   13.40    3.07
 -31  -1   5   11.73    2.83
  31  -1  -5   13.49    2.84
  31   1  -5   13.88    2.43
  31   1  -5   10.57    2.95
 -31   1   5   12.69    3.05
  29  -1  -5   38.64    3.51
 -29  -1   5   36.03    3.68
  29  -1  -5   42.73    4.20
  29   1  -5   39.58    3.22
  29   1  -5   43.47    4.02
  29   1  -5   42.03    3.40
 -29   1   5   35.13    3.86
 -27  -1   5    4.26    2.37
  27  -1  -5    7.12    2.30
  27  -1  -5    4.22    2.26
  27   1  -5    8.41    2.03
  27   1  -5    5.63    2.46
 -27   1   5    4.82    2.33
  27   1  -5    7.10    2.10
  25  -1  -5   19.21    2.16
 -25  -1   5   14.37    2.60
  25  -1  -5   11.30    2.42
  25  -1  -5   16.30    2.42
  25   1  -5   15.12    2.17
 -25   1   5   13.36    2.38
  25   1  -5   15.41    2.67
  25   1  -5   18.05    2.73
  23  -1  -5   26.66    3.18
 -23  -1   5   24.29    2.84
 -23   1   5   21.82    2.93
  23   1  -5   23.81    3.07
  23   1  -5   19.77    2.49
  21  -1  -5   -0.08    1.67
 -21  -1   5    3.78    1.97
 -21   1   5   -0.24    1.60
  21   1  -5    5.21    2.02
  19  -1  -5   39.79    3.26
 -19  -1   5   45.10    3.02
  19   1  -5   42.86    3.49
 -19   1   5   43.85    3.07
 -17  -1   5   51.78    3.34
  17  -1  -5   58.64    3.13
 -17   1   5   58.21    3.15
  17   1  -5   54.06    3.60
  15  -1  -5   59.59    3.02
 -15   1   5   55.81    2.88
  15   1  -5   54.48    3.19
  13  -1  -5    9.41    1.79
  13   1  -5    8.55    1.88
  13   1  -5    8.20    1.77
 -13   1   5   10.65    1.55
  11  -1  -5    4.97    1.56
  11  -1  -5    5.50    1.59
  11   1  -5    2.15    1.52
 -11   1   5    7.56    1.41
  11   1  -5    3.94    1.63
   9  -1  -5   71.63    3.09
   9  -1  -5   73.35    3.06
  -9  -1   5   77.65    3.19
   9   1  -5   75.26    3.21
   9   1  -5   72.85    3.34
  -7  -1   5  222.87    5.46
   7  -1  -5  227.97    5.16
   7  -1  -5  224.49    5.20
   7   1  -5  226.70    5.60
   7   1  -5  229.32    5.55
   5  -1  -5   45.07    2.50
  -5  -1   5   45.51    2.99
   5   1  -5   49.09    2.70
   5   1  -5   49.75    2.83
   5   1  -5   44.13    2.70
   3  -1  -5   10.10    1.16
   3  -1  -5   13.19    1.57
  -3  -1   5   12.52    1.87
   3   1  -5    7.98    1.58
   3   1  -5   11.32    1.59
  -1  -1   5   43.85    2.65
   1  -1  -5   41.17    2.45
   1  -1  -5   42.01    2.02
  -1   1   5   44.10    2.59
   1   1  -5   45.49    2.46
   1   1  -5   41.59    2.52
  -1  -1  -5   51.19    2.79
  -1  -1  -5   53.95    2.43
   1  -1   5   60.18    3.18
  -1   1  -5   48.89    2.98
   1   1   5   54.13    2.62
  -1   1  -5   58.19    2.97
  -3  -1  -5   74.96    2.81
   3  -1   5   74.38    3.37
  -3  -1  -5   70.65    2.98
  -3   1  -5   69.88    3.25
   3   1   5   69.79    2.97
  -3   1  -5   66.54    3.09
   5  -1   5  129.12    4.14
  -5  -1  -5  123.16    3.83
  -5  -1  -5  118.08    3.98
   5   1   5  125.41    3.76
  -5   1  -5  123.29    4.06
  -5   1  -5  129.61    4.38
  -7  -1  -5   25.19    2.56
  -7  -1  -5   27.90    2.86
   7  -1   5   26.46    2.82
   7   1   5   27.45    2.34
  -7   1  -5   27.96    2.59
  -7   1  -5   31.16    2.62
  -9  -1  -5   27.52    2.65
  -9  -1  -5   26.78    2.45
   9  -1   5   28.54    2.87
   9   1   5   26.09    2.26
  -9   1  -5   27.45    2.61
  -9   1  -5   26.43    2.72
  11  -1   5   -0.86    1.68
 -11  -1  -5   -1.22    1.50
 -11  -1  -5    2.91    1.68
  11   1   5   -1.68    1.24
 -11   1  -5    0.91    1.73
 -11   1  -5    1.44    1.61
 -13  -1  -5   17.01    2.39
  13  -1   5   19.15    2.68
 -13  -1  -5   15.74    2.41
  13   1   5   16.74    2.08
 -13   1  -5   20.81    2.67
 -13   1  -5   13.89    2.26
  15  -1   5    2.79    1.89
 -15  -1  -5   -0.29    1.96
 -15  -1  -5    2.52    2.01
 -15   1  -5    0.47    1.82
 -15   1  -5    1.47    1.87
  15   1   5    1.50    1.44
 -17  -1  -5    6.95    2.23
  17  -1   5   11.55    2.26
 -17  -1  -5   10.04    2.47
  17   1   5    8.71    1.75
 -17   1  -5    4.21    2.18
 -17   1  -5    9.37    2.30
 -19  -1  -5    1.52    2.30
 -19  -1  -5   -1.55    2.01
  19  -1   5    1.77    2.14
 -19   1  -5    0.46    2.16
  19   1   5    0.49    1.61
 -19   1  -5    3.74    2.12
 -21  -1  -5    2.03    2.52
  21  -1   5   -1.48    1.98
 -21  -1  -5    5.23    2.60
 -21   1  -5    1.67    2.21
 -21   1  -5    0.79    2.56
 -23  -1  -5    0.13    2.59
 -23  -1  -5   -2.57    2.22
  23  -1   5    0.74    2.25
 -23   1  -5    3.27    2.73
 -23   1  -5    2.23    2.56
  25  -1   5    0.63    2.39
 -25  -1  -5    3.39    2.60
 -25  -1  -5   -3.94    2.63
 -25   1  -5    0.99    2.83
 -25   1  -5    2.14    2.55
 -27  -1  -5    0.55    2.87
 -27  -1  -5   -2.78    2.69
 -27   1  -5   -2.54    2.52
 -27   1  -5   -0.96    2.42
 -29  -1  -5   24.06    4.12
 -29  -1  -5   22.32    4.04
 -29   1  -5   26.17    4.00
 -29   1  -5   17.44    3.74
 -31  -1  -5    5.87    3.49
 -31  -1  -5    8.42    3.30
 -31   1  -5    6.41    3.32
 -31   1  -5    9.19    3.27
 -33  -1  -5    6.00    3.35
 -33  -1  -5    2.93    3.17
 -33   1  -5    0.46    3.00
 -33   1  -5    5.36    3.70
 -35  -1  -5    7.13    3.80
 -35  -1  -5    4.33    3.40
 -35   1  -5    8.30    4.02
 -35   1  -5    5.15    3.55
 -37  -1  -5    2.78    3.50
 -37  -1  -5   -4.58    3.26
 -37   1  -5    3.23    3.98
 -37   1  -5    3.63    3.35
 -44  -2   5   -3.19    3.46
 -44  -2   5    1.31    3.20
  44  -2  -5   -0.14    3.19
 -44   2   5   -4.14    3.02
 -44   2   5    5.74    3.58
 -42  -2   5   -3.28    2.86
  42  -2  -5   -0.31    3.02
 -42   2   5   -1.79    3.17
  42   2  -5    4.18    3.67
 -42   2   5   -1.65    3.07
 -40  -2   5   -0.85    3.23
  40  -2  -5    4.54    2.90
  40   2  -5   -1.88    3.30
 -40   2   5    5.28    3.23
 -40   2   5    1.73    3.05
  38  -2  -5    1.78    2.89
 -38  -2   5    3.48    2.94
  38   2  -5   -0.55    2.85
  38   2  -5    2.32    1.92
 -38   2   5    3.72    3.04
  36  -2  -5    5.97    3.06
  36  -2  -5    6.40    2.92
 -36  -2   5    0.44    2.79
 -36   2   5    0.65    2.76
  36   2  -5    4.27    3.19
  36   2  -5    4.65    1.94
  34  -2  -5   10.01    2.97
  34  -2  -5    6.52    3.02
 -34  -2   5   11.17    3.24
  34   2  -5    7.37    3.23
  34   2  -5    7.29    2.12
 -34   2   5   13.18    3.24
  32  -2  -5   50.64    4.53
  32  -2  -5   51.31    4.09
 -32  -2   5   57.03    4.76
 -32   2   5   46.08    4.39
  32   2  -5   52.80    3.22
  32   2  -5   52.23    4.92
  30  -2  -5    9.55    2.76
 -30  -2   5    6.07    2.58
  30  -2  -5   10.54    2.88
  30   2  -5   10.91    2.73
 -30   2   5    7.58    2.76
  30   2  -5   15.47    3.29
  30   2  -5    7.97    2.01
  28  -2  -5   -1.24    2.31
 -28  -2   5   -1.69    2.04
  28  -2  -5    0.13    2.32
  28   2  -5    0.78    2.47
  28   2  -5    0.15    2.12
  28   2  -5    1.27    1.77
 -28   2   5   -0.75    2.16
  26  -2  -5   66.82    4.34
  26  -2  -5   76.23    4.09
 -26  -2   5   68.67    4.21
  26   2  -5   80.07    3.30
  26   2  -5   79.24    4.26
  26   2  -5   68.21    4.58
 -26   2   5   70.72    4.01
  24  -2  -5   34.99    3.45
 -24  -2   5   37.49    3.30
  24   2  -5   36.35    2.46
 -24   2   5   35.24    3.33
  24   2  -5   35.11    3.43
  24   2  -5   43.74    3.64
 -22  -2   5    8.84    2.24
  22  -2  -5    6.19    1.93
 -22   2   5   10.69    2.22
  22   2  -5    9.17    2.30
  22   2  -5    8.12    2.25
  22   2  -5    9.64    1.66
 -20  -2   5   44.95    3.17
  20  -2  -5   46.89    3.25
 -20   2   5   41.65    3.03
  20   2  -5   40.28    3.25
  18  -2  -5    9.48    1.89
 -18  -2   5    5.52    1.97
 -18   2   5    9.86    1.87
  18   2  -5    7.21    2.02
  16  -2  -5   -0.55    1.52
  16   2  -5    1.02    1.80
 -16   2   5    3.00    1.47
  14  -2  -5   26.11    2.43
 -14   2   5   26.28    2.15
  14   2  -5   28.58    2.68
 -12  -2   5   39.71    2.50
  12  -2  -5   35.78    2.38
  12   2  -5   41.03    2.72
  12   2  -5   36.68    2.80
 -12   2   5   37.67    2.31
  10  -2  -5  223.37    5.14
 -10  -2   5  219.75    5.46
  10  -2  -5  221.18    5.24
 -10   2   5  220.60    4.63
  10   2  -5  224.29    5.60
  10   2  -5  220.39    5.68
  -8  -2   5   24.71    2.55
   8  -2  -5   21.24    2.20
   8  -2  -5   23.02    2.17
   8   2  -5   21.08    2.27
  -8   2   5   23.58    1.42
   8   2  -5   22.25    2.71
   6  -2  -5  114.11    3.35
  -6  -2   5  114.97    3.71
   6  -2  -5  112.45    3.26
  -6   2   5  102.56    2.34
   6   2  -5  114.08    3.81
   6   2  -5  108.93    3.70
  -4  -2   5  287.03    6.74
   4  -2  -5  283.90    5.91
  -4   2   5  288.61    4.91
   4   2  -5  288.20    6.50
   4   2  -5  282.54    6.35
  -2  -2   5   34.56    2.98
   2  -2  -5   35.92    2.12
   2  -2  -5   41.77    1.51
   2   2  -5   41.73    2.73
   2   2  -5   36.74    2.63
   0  -2  -5   25.82    2.27
   0  -2  -5   31.08    1.66
   0  -2   5   25.77    2.55
   0   2  -5   24.35    2.62
   0   2  -5   27.20    2.53
  -2  -2  -5    2.18    1.06
  -2  -2  -5    3.53    1.32
   2  -2   5   -0.65    1.60
  -2   2  -5    0.80    1.58
  -2   2  -5    1.93    1.53
  -4  -2  -5   48.47    2.75
  -4  -2  -5   48.20    2.47
   4  -2   5   47.16    3.31
  -4   2  -5   43.88    2.90
  -4   2  -5   47.78    2.81
   6  -2   5    8.68    2.14
  -6  -2  -5   10.76    1.70
  -6  -2  -5   10.44    1.61
  -6   2  -5   11.00    2.08
  -6   2  -5    9.87    1.80
   6   2   5   11.23    1.48
   8  -2   5   68.06    3.51
  -8  -2  -5   55.88    3.04
  -8  -2  -5   66.19    3.30
  -8   2  -5   63.91    3.38
  -8   2  -5   61.49    3.55
   8   2   5   64.42    2.57
 -10  -2  -5   44.07    3.19
  10  -2   5   43.11    3.31
 -10  -2  -5   35.28    2.83
 -10   2  -5   32.89    3.21
  10   2   5   36.88    2.14
 -10   2  -5   39.45    2.97
  12  -2   5   -1.44    1.75
 -12  -2  -5   -0.98    1.69
 -12  -2  -5   -1.60    1.59
 -12   2  -5    1.13    1.70
 -12   2  -5    1.06    1.86
  12   2   5    2.67    1.16
 -14  -2  -5   27.80    2.79
  14  -2   5   25.41    3.05
 -14  -2  -5   24.55    3.19
 -14   2  -5   23.61    2.84
 -14   2  -5   26.18    2.93
  14   2   5   25.38    2.01
  16  -2   5   49.43    3.87
 -16  -2  -5   50.56    3.74
 -16  -2  -5   51.37    3.64
 -16   2  -5   43.15    3.56
  16   2   5   53.31    2.49
 -16   2  -5   49.44    3.90
 -18  -2  -5    2.95    2.31
 -18  -2  -5    2.21    2.21
  18  -2   5    1.19    2.10
 -18   2  -5    2.54    2.19
 -18   2  -5    1.75    2.20
 -20  -2  -5   87.00    4.90
 -20  -2  -5   85.54    4.84
  20  -2   5   91.02    4.85
 -20   2  -5   95.64    5.21
 -20   2  -5   86.19    5.20
 -22  -2  -5   50.94    4.46
 -22  -2  -5   55.58    4.35
  22  -2   5   62.62    4.17
 -22   2  -5   54.05    4.59
 -22   2  -5   45.45    4.15
  24  -2   5    2.41    2.58
 -24  -2  -5    3.24    2.72
 -24  -2  -5    2.14    2.71
 -24   2  -5   -2.78    2.50
 -24   2  -5    2.62    2.80
 -26  -2  -5   12.20    3.19
  26  -2   5   10.04    2.99
 -26  -2  -5   13.76    3.20
 -26   2  -5   14.95    3.71
 -26   2  -5   19.87    3.65
 -28  -2  -5   -1.59    2.58
 -28  -2  -5    2.72    3.07
 -28   2  -5    2.06    2.71
 -28   2  -5    1.76    3.16
 -30  -2  -5   12.68    3.71
 -30  -2  -5    8.33    3.22
 -30   2  -5   10.52    3.49
 -30   2  -5   13.30    3.80
 -32  -2  -5   -2.63    3.15
 -32  -2  -5   -3.45    3.13
 -32   2  -5   -1.72    3.04
 -32   2  -5    1.37    3.16
 -34  -2  -5   -4.04    2.92
 -34  -2  -5   -1.72    3.04
 -34   2  -5    2.76    3.61
 -34   2  -5   -1.92    3.25
 -36  -2  -5    0.12    3.58
 -36  -2  -5   -2.61    3.50
 -36   2  -5   -0.54    3.74
 -36   2  -5    2.13    3.44
  43  -3  -5   40.19    4.57
 -43  -3   5   57.43    5.65
 -43   3   5   51.03    5.58
 -43   3   5   34.84    4.90
  43   3  -5   41.27    5.56
 -41  -3   5   -3.22    3.29
  41  -3  -5   -0.91    3.02
 -41   3   5    1.67    2.82
  41   3  -5    5.25    3.38
 -41   3   5   -0.84    3.07
  39  -3  -5   53.01    4.70
 -39  -3   5   48.72    5.11
  39   3  -5   58.61    5.27
 -39   3   5   74.27    5.70
 -39   3   5   66.54    5.43
  37  -3  -5   36.76    4.50
 -37  -3   5   32.58    4.32
 -37   3   5   33.93    4.58
  37   3  -5   33.25    4.82
 -37   3   5   35.48    4.44
  35  -3  -5   -0.76    2.74
 -35  -3   5   -2.04    2.55
  35   3  -5    2.16    3.00
 -35   3   5    2.19    2.71
  33  -3  -5   35.15    4.06
 -33  -3   5   36.53    4.11
  33  -3  -5   34.89    4.17
  33   3  -5   38.33    2.01
 -33   3   5   38.36    4.23
  33   3  -5   33.51    4.15
  31  -3  -5   -1.20    2.37
 -31  -3   5    0.86    2.60
  31  -3  -5    0.91    2.62
  31   3  -5   -0.81    1.36
  31   3  -5   -1.86    2.59
  31   3  -5    0.45    2.28
 -31   3   5    1.77    2.43
  29  -3  -5    2.31    2.41
 -29  -3   5    1.65    2.72
  29  -3  -5    5.09    2.63
 -29   3   5   -2.59    2.13
  29   3  -5    0.19    2.51
  29   3  -5   -0.47    2.41
  29   3  -5   -0.54    1.41
  27  -3  -5   26.06    3.22
 -27  -3   5   25.90    3.34
  27  -3  -5   19.43    2.92
  27   3  -5   19.54    2.90
  27   3  -5   22.51    2.20
 -27   3   5   21.75    2.91
  27   3  -5   23.15    3.39
  25  -3  -5   14.69    2.62
 -25  -3   5   13.75    2.63
  25   3  -5   22.43    3.14
 -25   3   5   23.82    3.08
  25   3  -5   17.04    2.04
  25   3  -5   17.45    2.78
 -23  -3   5   40.01    3.77
  23  -3  -5   45.76    3.39
  23   3  -5   46.36    3.77
  23   3  -5   40.52    3.84
  23   3  -5   41.32    2.32
 -23   3   5   44.45    3.32
 -21  -3   5   -1.20    1.93
  21  -3  -5    0.76    1.65
  21   3  -5    0.60    2.20
 -21   3   5    0.05    1.64
  21   3  -5    1.05    1.22
  21   3  -5    3.16    1.95
  19  -3  -5  210.18    5.80
 -19   3   5  209.26    5.73
  19   3  -5  217.02    6.53
  17  -3  -5  230.81    5.99
 -17   3   5  238.52    5.89
  17   3  -5  228.81    6.72
 -15  -3   5   21.40    2.29
  15  -3  -5   24.52    2.41
  15   3  -5   22.66    2.67
 -15   3   5   25.52    2.26
  13  -3  -5  282.09    6.18
 -13  -3   5  274.87    6.46
  13   3  -5  284.23    6.99
 -13   3   5  273.33    5.86
  13   3  -5  271.42    6.88
 -11  -3   5   19.04    2.58
  11  -3  -5   20.74    1.95
  11   3  -5   26.49    2.66
  11   3  -5   24.85    2.83
 -11   3   5   27.93    1.79
   9  -3  -5    4.53    1.19
  -9  -3   5    5.17    1.65
   9  -3  -5    3.36    1.27
   9   3  -5    2.07    1.69
  -9   3   5    3.21    0.91
   9   3  -5    5.01    1.66
   7  -3  -5    2.74    1.09
   7  -3  -5   -1.42    1.12
  -7  -3   5   -0.83    1.45
   7   3  -5   -1.95    1.25
   7   3  -5    2.42    1.51
   5  -3  -5    1.63    1.09
  -5  -3   5    2.53    1.64
   5   3  -5    3.51    1.50
   5   3  -5    2.81    1.65
   5   3  -5    2.42    1.53
  -3  -3   5    1.69    1.62
   3  -3  -5    0.99    1.08
   3   3  -5    1.58    1.44
   3   3  -5    2.39    1.66
   1  -3  -5   28.01    1.26
   1  -3  -5   28.98    1.91
  -1  -3   5   35.21    2.78
   1   3  -5   34.98    2.59
   1   3  -5   27.78    2.76
   1  -3   5   31.09    3.21
  -1  -3  -5   38.51    1.76
  -1  -3  -5   37.17    2.23
  -1   3  -5   39.61    2.74
  -1   3  -5   41.22    2.75
  -3  -3  -5  224.62    5.27
  -3  -3  -5  222.28    4.85
   3  -3   5  226.72    6.26
  -3   3  -5  216.77    5.80
  -3   3  -5  231.91    5.99
  -5  -3  -5    1.72    1.45
   5  -3   5    0.61    1.94
  -5  -3  -5    2.60    1.26
  -5   3  -5    4.09    1.64
  -5   3  -5   -0.18    1.76
  -7  -3  -5  102.62    3.65
   7  -3   5  110.56    4.47
  -7  -3  -5  101.20    3.82
  -7   3  -5  105.50    4.25
  -7   3  -5  104.21    4.01
   9  -3   5  251.99    6.24
  -9  -3  -5  263.05    6.62
  -9  -3  -5  256.98    6.33
   9  -3   5  261.19    7.30
  -9   3  -5  247.24    6.96
  -9   3  -5  252.59    6.75
  11  -3   5   -0.43    1.86
 -11  -3  -5    2.06    1.68
  11  -3   5    0.56    1.92
 -11  -3  -5    2.12    1.68
 -11   3  -5   -1.54    1.51
 -11   3  -5   -1.35    1.80
 -13  -3  -5   52.13    3.40
 -13  -3  -5   50.18    3.57
  13  -3   5   51.00    3.60
  13  -3   5   53.57    3.63
 -13   3  -5   43.75    3.72
 -13   3  -5   49.51    3.38
  15  -3   5   16.83    2.84
  15  -3   5   19.81    2.57
 -15  -3  -5   12.56    2.42
 -15  -3  -5   13.25    2.37
 -15   3  -5   17.46    2.78
 -15   3  -5   17.08    2.66
  17  -3   5    1.88    2.30
 -17  -3  -5   -4.24    1.91
 -17  -3  -5   -0.56    2.06
 -17   3  -5   -0.27    1.87
 -17   3  -5   -4.51    1.84
  19  -3   5    0.04    2.34
 -19  -3  -5    1.51    2.31
 -19  -3  -5    0.90    2.11
 -19   3  -5   -0.33    2.43
 -19   3  -5   -1.13    2.05
  21  -3   5    8.40    2.77
 -21  -3  -5    3.10    2.60
 -21  -3  -5    6.34    2.65
 -21   3  -5    5.41    2.60
 -21   3  -5    3.01    2.34
  23  -3   5   38.76    4.32
 -23  -3  -5   24.95    3.63
 -23  -3  -5   22.88    3.55
 -23   3  -5   28.94    3.76
 -23   3  -5   28.11    3.83
 -25  -3  -5   25.57    3.74
 -25  -3  -5   14.67    3.43
  25  -3   5   21.15    3.53
 -25   3  -5   17.34    3.43
 -25   3  -5   16.44    3.59
  27  -3   5   -0.80    2.77
 -27  -3  -5    2.27    2.72
 -27  -3  -5    1.36    2.95
 -27   3  -5    3.08    2.85
 -27   3  -5    6.50    2.91
 -29  -3  -5   81.37    5.84
  29  -3   5   78.10    5.20
 -29  -3  -5   73.55    5.47
 -29   3  -5   72.76    5.76
 -29   3  -5   79.78    5.58
 -31  -3  -5   15.71    3.64
 -31  -3  -5    9.51    3.65
 -31   3  -5   11.55    3.66
 -31   3  -5   12.91    3.90
 -33  -3  -5   25.90    4.61
 -33  -3  -5   38.14    5.24
 -33   3  -5   40.80    5.41
 -33   3  -5   40.97    5.23
 -35  -3  -5   21.50    4.51
 -35  -3  -5   34.61    5.02
 -35   3  -5   23.67    4.71
 -35   3  -5   21.91    4.46
  42  -4  -5   12.63    3.85
 -42  -4   5   12.50    4.12
  42   4  -5    7.42    3.89
 -42   4   5    7.23    3.53
 -42   4   5    5.68    3.53
 -40  -4   5   -2.83    2.88
  40  -4  -5   -0.43    3.11
 -40   4   5   -2.13    2.59
 -40   4   5    0.72    2.99
  40   4  -5   -3.70    3.10
 -38  -4   5   20.08    4.06
  38  -4  -5   22.14    3.95
 -38   4   5   14.93    3.61
 -38   4   5   22.07    3.87
  38   4  -5   21.81    4.00
  36  -4  -5   63.67    5.05
 -36  -4   5   54.94    5.03
  36   4  -5   60.36    5.43
 -36   4   5   47.84    4.85
 -36   4   5   46.44    4.66
 -34  -4   5   13.53    3.62
  34  -4  -5   14.82    3.49
 -34   4   5   11.75    3.23
 -34   4   5   11.17    3.14
  34   4  -5   10.88    3.30
  34   4  -5   13.49    3.21
  32  -4  -5   54.10    4.55
 -32  -4   5   61.11    4.79
 -32   4   5   60.96    4.63
  32   4  -5   62.96    4.87
  32   4  -5   55.87    4.62
  30  -4  -5   79.71    4.85
 -30  -4   5   73.10    4.97
  30   4  -5   84.22    5.30
 -30   4   5   84.23    4.87
  30   4  -5   83.07    5.45
 -28  -4   5    9.21    2.93
  28  -4  -5    5.58    2.60
  28  -4  -5    4.86    2.51
  28   4  -5    9.21    2.79
 -28   4   5    7.12    2.51
  28   4  -5    7.76    2.83
 -26  -4   5   52.43    4.09
  26  -4  -5   53.63    4.08
  26  -4  -5   53.87    3.99
  26   4  -5   56.08    4.45
 -26   4   5   58.79    4.13
  26   4  -5   53.42    4.43
 -24  -4   5   22.18    3.17
  24  -4  -5   25.17    2.93
 -24   4   5   15.65    2.46
  24   4  -5   20.27    3.00
  24   4  -5   19.43    2.96
 -22  -4   5    5.10    2.31
  22  -4  -5    2.42    1.76
  22   4  -5    0.53    1.97
  22   4  -5   -1.04    2.27
 -22   4   5    0.44    1.79
  20  -4  -5    1.32    1.71
 -20   4   5    6.88    1.84
  20   4  -5    7.43    2.64
  20   4  -5    1.41    2.05
  18  -4  -5   32.19    2.63
 -18  -4   5   32.19    2.44
 -18   4   5   41.86    2.75
  18   4  -5   36.38    1.45
  18   4  -5   32.58    3.97
  18   4  -5   35.50    3.38
  18   4  -5   32.00    1.42
  16  -4  -5  100.64    3.48
 -16  -4   5  100.38    3.57
 -16   4   5   96.81    3.43
  16   4  -5   94.17    2.38
  16   4  -5  100.99    4.15
  14  -4  -5   10.61    1.57
 -14  -4   5   11.12    1.77
  14   4  -5   13.81    2.24
  14   4  -5   10.25    1.14
 -14   4   5   10.00    1.49
  12  -4  -5  200.75    4.66
 -12  -4   5  197.58    5.35
  12   4  -5  215.56    5.73
  12   4  -5  206.58    4.16
 -12   4   5  206.45    4.55
  12   4  -5  208.57    5.97
 -10  -4   5  165.30    4.93
  10  -4  -5  169.98    3.92
  10   4  -5  172.75    5.08
  10   4  -5  172.75    3.87
  10   4  -5  173.79    4.85
 -10   4   5  174.10    3.71
  -8  -4   5   30.00    2.88
   8  -4  -5   35.95    1.79
  -8   4   5   28.86    1.29
   8   4  -5   35.98    2.22
   8   4  -5   27.41    2.81
   8   4  -5   35.40    2.58
   6  -4  -5  168.05    3.76
   6  -4  -5  171.73    3.87
  -6  -4   5  181.50    5.36
   6   4  -5  170.96    4.13
   6   4  -5  179.53    4.83
   6   4  -5  176.51    5.00
  -4  -4   5   88.44    4.10
   4  -4  -5   91.51    2.63
   4   4  -5   98.34    3.57
   4   4  -5  100.93    4.03
   4   4  -5   92.75    3.66
   4   4  -5   94.16    3.26
  -2  -4   5    4.26    2.12
   2  -4  -5    8.46    1.11
   2   4  -5    9.45    1.68
   2   4  -5    6.48    1.87
   0  -4  -5  192.69    3.90
   0  -4   5  204.69    6.00
   0  -4  -5  197.47    4.38
   0   4  -5  195.45    5.24
   2  -4   5   70.89    3.68
  -2  -4  -5   70.79    2.45
  -2  -4  -5   70.85    2.69
   2  -4   5   73.37    3.88
  -2   4  -5   79.32    3.36
  -2   4  -5   74.15    3.55
   4  -4   5    0.20    1.81
   4  -4   5    1.01    1.91
  -4  -4  -5    0.64    1.16
  -4  -4  -5    2.59    1.20
  -4   4  -5   -0.23    1.48
  -4   4  -5    0.94    1.76
   6  -4   5   54.08    3.64
  -6  -4  -5   52.28    2.55
  -6  -4  -5   57.24    2.83
   6  -4   5   55.73    3.27
  -6   4  -5   56.04    3.26
  -6   4  -5   56.10    3.61
   8  -4   5    8.99    2.46
  -8  -4  -5   12.48    1.82
   8  -4   5    9.26    2.13
  -8  -4  -5   11.01    1.73
  -8   4  -5    9.73    1.90
  -8   4  -5    7.48    2.18
  10  -4   5   44.28    3.62
 -10  -4  -5   45.03    3.11
 -10  -4  -5   36.21    2.86
  10  -4   5   40.69    3.53
 -10   4  -5   36.00    3.46
 -10   4  -5   42.46    3.23
  12  -4   5   29.74    3.54
 -12  -4  -5   29.46    2.97
  12  -4   5   33.42    3.44
 -12  -4  -5   28.29    2.81
 -12   4  -5   36.98    3.50
 -12   4  -5   37.00    3.26
  14  -4   5   24.88    3.18
 -14  -4  -5   30.05    3.15
  14  -4   5   23.87    3.30
 -14  -4  -5   28.78    3.01
 -14   4  -5   31.57    3.33
 -14   4  -5   26.84    3.25
 -16  -4  -5  133.20    5.44
  16  -4   5  123.51    5.92
 -16  -4  -5  139.65    5.37
  16  -4   5  137.94    5.43
 -16   4  -5  133.81    5.64
 -16   4  -5  139.24    5.68
  18  -4   5    3.15    2.63
 -18  -4  -5    7.40    2.50
 -18  -4  -5    5.79    2.43
  18  -4   5    2.16    2.64
 -18   4  -5    1.49    2.12
 -18   4  -5    1.44    2.43
 -20  -4  -5   40.26    4.00
  20  -4   5   33.74    4.19
  20  -4   5   41.84    4.12
 -20  -4  -5   39.27    3.94
 -20   4  -5   40.03    4.00
 -20   4  -5   37.43    3.81
 -22  -4  -5   60.29    4.57
  22  -4   5   57.71    4.84
 -22  -4  -5   49.64    4.42
  22  -4   5   49.80    4.35
 -22   4  -5   50.85    4.56
 -22   4  -5   53.81    4.85
  24  -4   5    1.43    2.79
 -24  -4  -5   -2.42    2.47
 -24  -4  -5   -0.84    2.59
 -24   4  -5    2.69    2.67
 -24   4  -5    1.93    2.48
 -26  -4  -5   13.46    3.17
 -26  -4  -5   18.13    3.64
  26  -4   5   16.60    3.66
 -26   4  -5   22.19    3.94
 -26   4  -5   23.30    3.82
 -28  -4  -5   16.47    3.50
  28  -4   5   15.84    3.53
 -28  -4  -5    9.38    3.36
 -28   4  -5   11.72    3.52
 -28   4  -5   15.40    3.68
 -30  -4  -5    7.93    3.51
  30  -4   5    8.34    3.38
 -30  -4  -5    0.43    3.12
 -30   4  -5   12.47    3.64
 -30   4  -5    5.60    3.29
 -32  -4  -5   -0.99    3.12
 -32  -4  -5   -4.97    3.10
 -32   4  -5    0.88    3.23
 -32   4  -5    4.12    3.33
 -34  -4  -5    4.91    3.73
 -34  -4  -5   -6.29    2.73
 -34   4  -5    1.61    3.62
 -34   4  -5    4.73    3.27
 -41  -5   5    0.15    3.56
  41  -5  -5    3.21    3.45
  41   5  -5    1.81    3.40
 -41   5   5    0.71    3.11
 -41   5   5    5.51    3.37
 -39  -5   5   43.62    5.45
  39  -5  -5   35.52    4.61
 -39   5   5   32.17    4.61
  39   5  -5   36.99    5.19
 -39   5   5   32.49    4.65
 -37  -5   5   25.98    4.53
  37  -5  -5   23.72    4.10
 -37   5   5   20.62    3.75
 -37   5   5   28.56    4.14
  37   5  -5   31.70    4.50
  35  -5  -5    5.73    3.39
 -35  -5   5   -1.72    3.01
 -35   5   5   -1.41    2.28
  35   5  -5   -0.39    2.93
 -35   5   5   -2.02    2.53
  35   5  -5   -3.71    2.88
  33  -5  -5   27.38    3.94
 -33  -5   5   29.11    4.21
 -33   5   5   23.38    3.56
  33   5  -5   25.33    4.09
  33   5  -5   24.30    4.02
 -33   5   5   19.72    3.46
  31  -5  -5   29.49    3.92
 -31  -5   5   29.25    4.17
 -31   5   5   30.51    3.74
  31   5  -5   32.51    4.41
 -31   5   5   25.23    3.50
  31   5  -5   36.40    4.37
  29  -5  -5   11.07    2.87
 -29  -5   5    8.30    3.05
 -29   5   5    6.44    2.47
  29   5  -5   13.15    3.28
  29   5  -5    7.58    3.12
  27  -5  -5    4.11    2.53
 -27  -5   5    4.86    2.59
  27   5  -5    1.09    2.73
 -27   5   5    5.91    2.28
  27   5  -5    2.02    2.40
  25  -5  -5   54.17    4.17
 -25  -5   5   52.62    4.49
  25   5  -5   58.71    4.25
  25   5  -5   64.33    4.86
 -25   5   5   56.67    3.88
 -23  -5   5   37.61    3.69
 -23   5   5   42.48    3.21
  23   5  -5   37.29    4.29
  23   5  -5   32.89    3.78
  21  -5  -5   -0.11    1.60
 -21   5   5   -1.17    1.67
  21   5  -5   -1.42    1.86
  21   5  -5    2.99    2.60
  19  -5  -5  107.95    3.97
 -19  -5   5  117.95    3.85
  19   5  -5  112.52    5.02
 -19   5   5  119.26    4.14
  19   5  -5  124.30    5.85
 -17  -5   5  144.49    4.48
  17  -5  -5  153.43    4.33
  17   5  -5  153.38    6.07
 -17   5   5  152.37    4.44
  17   5  -5  137.76    5.20
 -15  -5   5   13.48    1.92
  15  -5  -5   14.79    1.85
  15   5  -5   14.54    3.04
  15   5  -5   12.46    2.22
 -15   5   5   14.02    1.99
  13  -5  -5   79.20    2.58
 -13  -5   5   73.75    3.46
  13   5  -5   78.19    3.59
  13   5  -5   73.93    3.77
 -13   5   5   78.60    2.78
 -11  -5   5   70.08    3.61
  11  -5  -5   79.90    2.32
  11   5  -5   77.33    1.92
  11   5  -5   73.44    3.67
  11   5  -5   76.00    3.43
 -11   5   5   79.76    2.53
  -9  -5   5    6.81    1.88
   9  -5  -5    4.02    0.81
   9   5  -5    6.10    1.11
   9   5  -5    4.25    1.56
   9   5  -5    4.80    1.75
  -9   5   5    4.84    0.94
  -7  -5   5    7.96    2.06
   7  -5  -5    8.27    0.98
   7   5  -5    7.30    1.32
   7   5  -5    8.18    1.61
   7   5  -5    6.44    1.73
   5  -5  -5    2.02    0.78
  -5  -5   5    3.09    1.98
   5  -5  -5    0.84    0.73
   5   5  -5    1.12    1.47
   5   5  -5    2.73    1.40
   5   5  -5    1.84    1.28
   3  -5  -5   19.59    1.34
  -3  -5   5   20.92    2.70
   3   5  -5   17.32    2.33
   3   5  -5   17.62    2.04
   3   5  -5   22.20    2.20
   3   5  -5   17.20    2.41
  -1  -5   5   19.58    2.71
  -1  -5   5   23.45    2.81
   1  -5  -5   23.06    1.39
   1  -5  -5   20.82    1.43
   1   5  -5   22.53    2.48
   1   5  -5   19.98    2.49
   1   5  -5   17.78    2.39
   1  -5   5   57.54    3.97
   1  -5   5   53.76    3.42
  -1  -5  -5   53.30    2.08
  -1  -5  -5   53.60    2.12
  -1   5  -5   58.02    3.25
  -1   5  -5   58.77    3.11
  -1   5  -5   51.88    2.86
   3  -5   5  175.20    5.21
  -3  -5  -5  166.31    4.08
   3  -5   5  173.08    5.89
  -3  -5  -5  166.05    4.14
  -3   5  -5  166.60    5.56
  -3   5  -5  157.60    4.91
  -5  -5  -5   31.51    2.14
   5  -5   5   28.20    3.24
  -5  -5  -5   26.79    2.19
   5  -5   5   35.27    3.29
  -5   5  -5   26.99    3.15
  -5   5  -5   31.99    2.71
  -7  -5  -5   20.46    2.11
  -7  -5  -5   27.91    2.27
   7  -5   5   21.28    2.52
   7  -5   5   24.76    3.61
  -7   5  -5   23.81    2.69
  -7   5  -5   27.67    2.93
  -9  -5  -5  144.13    4.59
   9  -5   5  155.42    5.37
  -9  -5  -5  145.79    4.57
   9  -5   5  134.36    5.74
  -9   5  -5  149.00    5.58
  -9   5  -5  141.73    5.04
  11  -5   5    3.00    2.32
 -11  -5  -5    2.56    1.71
 -11  -5  -5    5.06    1.82
  11  -5   5    5.87    2.40
 -11   5  -5    3.68    1.88
 -11   5  -5    1.66    2.02
 -13  -5  -5   81.75    4.05
  13  -5   5   70.77    4.87
  13  -5   5   76.45    4.57
 -13  -5  -5   78.23    3.90
 -13   5  -5   84.77    4.75
 -13   5  -5   68.87    4.06
 -15  -5  -5   13.12    2.44
 -15  -5  -5   16.32    2.56
  15  -5   5    9.61    2.98
  15  -5   5   23.23    3.22
 -15   5  -5   16.48    2.58
 -15   5  -5   11.86    2.67
  17  -5   5   19.04    3.55
 -17  -5  -5   23.52    3.10
 -17  -5  -5   20.66    2.98
  17  -5   5   22.07    3.35
 -17   5  -5   18.47    2.96
 -17   5  -5   21.09    3.25
 -19  -5  -5    1.57    2.28
 -19  -5  -5    7.18    2.54
  19  -5   5    3.56    2.99
  19  -5   5    3.81    2.92
 -19   5  -5    7.86    2.62
 -19   5  -5    4.88    2.79
  21  -5   5    8.77    3.13
 -21  -5  -5   13.95    3.00
  21  -5   5    9.50    3.34
 -21  -5  -5   12.72    2.94
 -21   5  -5    9.11    3.06
 -21   5  -5    9.56    2.82
 -23  -5  -5   18.87    3.40
  23  -5   5   25.81    3.98
  23  -5   5   22.22    3.65
 -23  -5  -5   28.28    4.02
 -23   5  -5   17.75    3.71
 -23   5  -5   26.08    3.69
 -25  -5  -5   10.15    3.16
  25  -5   5   17.04    3.52
  25  -5   5   17.76    3.80
 -25  -5  -5    9.11    3.25
 -25   5  -5   13.58    3.45
 -25   5  -5   15.07    3.39
 -27  -5  -5   22.49    3.78
 -27  -5  -5   22.54    3.91
  27  -5   5   15.99    3.98
 -27   5  -5   19.92    3.64
 -27   5  -5   24.53    4.18
 -29  -5  -5   56.92    5.32
 -29  -5  -5   73.62    5.69
  29  -5   5   61.09    5.46
 -29   5  -5   53.61    4.96
 -29   5  -5   65.65    5.82
 -31  -5  -5    7.22    3.18
 -31  -5  -5   -1.95    3.20
  31  -5   5    5.78    3.50
 -31   5  -5    3.42    3.07
 -31   5  -5   10.22    3.91
 -33  -5  -5    7.84    3.69
 -33  -5  -5    6.67    3.71
 -33   5  -5    5.48    3.48
 -33   5  -5    3.34    3.78
  40  -6  -5   -0.40    3.57
 -40  -6   5    3.09    3.62
 -40   6   5    1.41    3.18
  40   6  -5    3.69    3.65
 -40   6   5   -2.40    2.90
 -38  -6   5   32.27    4.79
 -38   6   5   31.82    4.47
 -38   6   5   39.54    4.71
  38   6  -5   42.50    4.90
 -36  -6   5   18.33    4.13
 -36   6   5    9.86    3.42
 -36   6   5   17.79    3.61
  36   6  -5   14.03    3.88
 -34  -6   5   -0.57    3.12
 -34   6   5   -0.29    2.67
 -34   6   5   -2.13    2.40
  34   6  -5    0.29    2.79
  34   6  -5    0.13    3.00
 -32  -6   5   48.19    5.06
  32   6  -5   39.90    4.84
 -32   6   5   53.75    4.37
 -32   6   5   54.50    4.49
  32   6  -5   47.15    4.96
 -30  -6   5   41.54    4.69
  30   6  -5   40.48    4.79
  30   6  -5   39.52    4.67
 -30   6   5   50.22    4.31
 -30   6   5   50.12    4.45
 -28  -6   5    5.33    2.88
 -28   6   5    0.02    2.18
 -28   6   5    1.78    2.37
  28   6  -5   -0.77    2.61
  28   6  -5    0.29    2.95
 -26  -6   5   29.88    3.80
  26   6  -5   28.78    4.14
 -26   6   5   23.43    3.08
 -26   6   5   36.42    3.50
  26   6  -5   27.72    3.85
 -24  -6   5   64.45    4.80
  24   6  -5   67.14    4.93
 -24   6   5   70.00    4.18
  24   6  -5   65.77    4.43
 -24   6   5   73.45    4.07
  22   6  -5   32.64    4.47
  22   6  -5   46.45    4.10
 -22   6   5   44.13    3.27
  20   6  -5   51.19    3.93
 -20   6   5   46.89    3.11
  20   6  -5   54.74    4.80
 -18  -6   5   71.54    3.33
  18   6  -5   71.28    4.23
 -18   6   5   71.99    3.28
  18   6  -5   64.85    5.06
 -16  -6   5   25.40    2.78
  16   6  -5   21.18    3.36
 -16   6   5   23.00    2.29
  16   6  -5   27.64    3.16
 -14  -6   5    0.60    1.70
  14   6  -5    0.65    2.50
  14   6  -5    0.08    1.70
 -14   6   5    3.91    1.31
 -12  -6   5   87.23    4.01
  12   6  -5   92.51    3.78
  12   6  -5   89.88    4.17
 -12   6   5   90.43    2.93
  12   6  -5   85.20    4.91
 -10  -6   5   91.02    4.10
  10   6  -5  103.84    4.13
  10   6  -5  103.37    3.89
 -10   6   5   98.76    2.78
  -8  -6   5    2.03    1.92
   8   6  -5    1.51    1.51
   8   6  -5    1.75    1.56
  -6  -6   5   49.63    3.60
   6   6  -5   45.56    2.77
   6   6  -5   43.70    2.91
  -4  -6   5  141.34    5.43
   4   6  -5  140.49    4.47
   4   6  -5  132.43    4.18
   4   6  -5  138.51    3.59
  -2  -6   5    8.91    1.99
   2  -6  -5    9.32    1.01
  -2  -6   5   10.80    2.45
   2   6  -5   11.81    1.59
   2   6  -5   10.66    1.75
   2   6  -5    7.53    1.76
   2   6  -5   12.89    2.28
   0  -6  -5   22.46    1.31
   0  -6   5   19.19    2.43
   0  -6  -5   26.94    1.70
   0  -6   5   23.45    3.12
   0   6  -5   20.05    2.32
   0   6  -5   21.81    2.35
   0   6  -5   20.69    2.94
   0   6  -5   22.13    2.46
   2  -6   5   99.95    4.83
  -2  -6  -5   98.29    3.04
   2  -6   5  106.79    4.32
  -2  -6  -5   94.78    2.70
  -2   6  -5  102.39    3.71
  -2   6  -5   90.56    4.41
  -2   6  -5   96.30    3.68
   4  -6   5   66.35    4.32
   4  -6   5   74.32    4.06
  -4  -6  -5   69.59    2.58
  -4  -6  -5   70.80    2.83
  -4   6  -5   68.33    3.32
  -4   6  -5   65.13    3.97
  -6  -6  -5    2.85    1.20
   6  -6   5    3.87    2.21
  -6  -6  -5    4.44    1.45
   6  -6   5    7.41    2.55
  -6   6  -5    7.14    1.83
  -6   6  -5    3.45    1.99
  -8  -6  -5   55.10    2.77
   8  -6   5   53.63    4.12
  -8  -6  -5   54.50    2.86
   8  -6   5   53.04    4.16
  -8   6  -5   54.17    3.72
  -8   6  -5   54.46    3.36
 -10  -6  -5   17.97    2.47
  10  -6   5   11.90    2.92
  10  -6   5   19.99    3.07
 -10  -6  -5   17.24    2.45
 -10   6  -5   16.98    2.42
 -10   6  -5   26.46    3.50
 -12  -6  -5    1.13    1.70
 -12  -6  -5    0.61    1.59
  12  -6   5    0.21    2.70
  12  -6   5    0.00    2.42
 -12   6  -5    2.73    2.31
 -12   6  -5   -1.27    1.79
 -14  -6  -5   23.98    2.90
  14  -6   5   18.97    3.35
 -14  -6  -5   17.51    2.49
  14  -6   5   15.65    3.05
 -14   6  -5   19.33    3.25
 -14   6  -5   20.20    2.81
  16  -6   5   46.42    4.21
 -16  -6  -5   52.08    4.00
 -16  -6  -5   54.69    3.95
  16  -6   5   53.14    4.95
 -16   6  -5   44.08    4.06
 -16   6  -5   53.01    4.02
 -18  -6  -5   -2.14    2.29
 -18  -6  -5    2.89    2.21
  18  -6   5   -4.02    2.47
  18  -6   5   -1.87    2.81
 -18   6  -5   -0.84    2.14
 -18   6  -5    1.59    2.69
 -20  -6  -5   31.02    3.71
  20  -6   5   29.43    4.04
 -20  -6  -5   28.67    3.74
  20  -6   5   29.23    4.21
 -20   6  -5   26.69    3.87
 -20   6  -5   28.28    3.80
 -22  -6  -5   28.49    3.92
  22  -6   5   28.13    4.08
  22  -6   5   24.45    4.08
 -22  -6  -5   25.40    3.62
 -22   6  -5   33.78    4.10
 -22   6  -5   32.66    4.42
 -24  -6  -5   16.27    3.31
  24  -6   5   11.88    3.81
  24  -6   5   12.98    3.36
 -24  -6  -5   13.75    3.37
 -24   6  -5   19.37    3.50
 -24   6  -5   14.62    3.63
  26  -6   5    2.23    3.40
 -26  -6  -5    4.05    3.11
  26  -6   5   13.07    3.67
 -26  -6  -5    8.54    3.20
 -26   6  -5    9.56    3.27
 -26   6  -5   10.21    3.28
  28  -6   5   19.24    4.24
 -28  -6  -5   25.32    4.14
 -28  -6  -5   27.82    4.17
  28  -6   5   25.35    4.16
 -28   6  -5   20.38    4.03
 -28   6  -5   17.77    3.64
 -30  -6  -5    7.37    3.44
 -30  -6  -5    5.18    3.36
  30  -6   5   12.98    4.19
 -30   6  -5   15.58    4.12
 -30   6  -5   10.09    3.65
  32  -6   5    4.39    3.78
 -32  -6  -5   -0.24    3.30
 -32  -6  -5   -3.27    3.07
 -32   6  -5   -1.43    3.01
 -32   6  -5    5.08    3.67
 -39  -7   5    0.35    3.58
  39   7  -5    3.77    3.57
 -37  -7   5   20.00    4.18
  37   7  -5   22.18    4.30
 -35  -7   5    8.08    3.77
  35   7  -5   10.28    3.41
  35   7  -5    3.55    3.57
 -33  -7   5   17.65    3.77
 -33   7   5   12.74    3.12
  33   7  -5   18.40    4.05
  33   7  -5   11.21    3.58
 -31  -7   5   57.86    4.99
  31   7  -5   48.85    4.94
  31   7  -5   56.57    5.09
 -31   7   5   49.75    4.22
 -29  -7   5    9.59    3.31
 -29   7   5   17.46    3.04
  29   7  -5    9.96    3.07
  29   7  -5   14.49    3.82
 -27  -7   5   21.16    3.52
  27   7  -5   27.71    4.28
 -27   7   5   22.47    3.15
  27   7  -5   16.53    3.25
 -25  -7   5   35.75    4.04
  25   7  -5   41.03    4.24
  25   7  -5   36.57    4.89
 -25   7   5   36.07    3.50
  23   7  -5   27.89    3.73
 -23   7   5   24.71    3.05
  23   7  -5   29.19    4.20
  21   7  -5    2.57    2.46
  21   7  -5    3.10    3.04
 -21   7   5    5.10    2.00
  19   7  -5   43.82    4.86
 -19   7   5   37.46    2.97
  19   7  -5   33.40    3.54
 -17  -7   5   23.97    2.89
  17   7  -5   19.56    2.81
 -17   7   5   20.19    2.46
  17   7  -5   15.70    3.33
 -15  -7   5    3.41    1.93
  15   7  -5   -3.92    2.66
  15   7  -5    1.47    2.06
 -15   7   5   -0.68    1.34
 -13  -7   5    8.70    2.24
  13   7  -5    3.05    2.02
 -13   7   5    6.05    1.49
  13   7  -5    5.76    2.82
 -11  -7   5   57.30    3.65
 -11   7   5   55.84    2.42
  11   7  -5   48.58    3.30
  11   7  -5   52.12    3.19
  11   7  -5   51.60    4.51
  -9  -7   5   62.36    3.92
   9   7  -5   62.99    3.27
   9   7  -5   64.29    4.62
   9   7  -5   54.72    3.30
  -7  -7   5   19.19    2.82
   7   7  -5   19.57    3.47
   7   7  -5   20.56    2.51
   7   7  -5   20.58    2.40
  -5  -7   5   82.98    4.35
   5   7  -5   85.00    5.27
   5   7  -5   84.63    3.45
   5   7  -5   85.98    3.81
  -3  -7   5   19.08    2.98
   3   7  -5   20.61    2.59
   3   7  -5   22.69    2.31
  -1  -7   5   -0.95    2.23
   1   7  -5    4.77    1.66
   1   7  -5   -1.03    1.39
   1   7  -5    1.97    1.99
   1  -7   5   43.95    3.86
  -1   7  -5   39.15    2.86
  -1   7  -5   37.41    2.77
  -1   7  -5   32.52    3.48
   3  -7   5    0.06    2.33
  -3  -7  -5    2.33    1.31
  -3   7  -5   -1.85    1.75
  -3   7  -5   -0.98    1.48
   5  -7   5   15.98    3.34
  -5  -7  -5   17.91    2.11
  -5   7  -5   17.01    2.75
  -5   7  -5   17.70    2.27
   7  -7   5   48.06    4.33
  -7  -7  -5   49.36    2.93
  -7   7  -5   47.34    3.99
  -7   7  -5   50.86    3.38
   9  -7   5   10.24    3.26
  -9  -7  -5    8.39    1.86
  -9   7  -5   11.21    2.27
  -9   7  -5    8.56    2.62
 -11  -7  -5   21.13    2.78
  11  -7   5   18.75    3.62
 -11   7  -5   14.06    2.83
 -11   7  -5   21.45    3.13
 -13  -7  -5   -0.36    1.81
  13  -7   5   -0.60    2.62
 -13   7  -5    1.45    2.54
 -13   7  -5   -1.42    1.85
 -15  -7  -5   23.19    3.27
  15  -7   5   28.43    4.10
 -15   7  -5   27.36    3.53
 -15   7  -5   23.92    3.49
 -17  -7  -5   23.05    3.11
  17  -7   5   23.09    3.99
 -17   7  -5   22.28    3.14
 -17   7  -5   17.41    3.44
  19  -7   5   14.28    3.75
 -19  -7  -5   12.27    3.01
 -19   7  -5   13.70    3.41
 -19   7  -5   20.18    3.24
 -21  -7  -5   39.68    4.16
  21  -7   5   38.43    5.17
 -21   7  -5   36.10    4.65
 -21   7  -5   42.99    4.18
 -23  -7  -5    3.06    2.98
  23  -7   5    9.11    3.59
  23  -7   5   11.26    3.91
 -23   7  -5   10.24    3.40
 -23   7  -5   13.57    3.24
  25  -7   5   -1.67    3.11
  25  -7   5    5.07    3.45
 -25  -7  -5   -3.77    2.66
 -25   7  -5    1.78    2.74
 -25   7  -5    2.68    3.31
 -27  -7  -5   12.42    3.68
  27  -7   5    7.17    3.78
  27  -7   5    7.39    3.89
 -27   7  -5    5.42    3.10
 -27   7  -5   18.73    3.92
 -29  -7  -5    1.98    3.25
  29  -7   5    1.93    3.62
  29  -7   5    2.77    3.81
 -29   7  -5    9.40    3.34
 -29   7  -5    2.32    3.28
  31  -7   5   -2.24    3.64
 -31   7  -5    6.57    3.53
 -31   7  -5    4.53    3.75
 -36  -8   5    0.33    3.54
  36   8  -5   -5.58    2.92
 -34  -8   5    8.81    3.75
  34   8  -5   -0.59    3.59
  34   8  -5    3.21    3.27
 -32  -8   5    1.84    3.36
  32   8  -5   10.04    3.60
  32   8  -5    3.19    3.15
 -30  -8   5    5.22    3.33
  30   8  -5    9.00    3.91
  30   8  -5   10.44    3.40
 -28  -8   5    7.82    3.17
  28   8  -5    7.89    3.18
  28   8  -5   10.48    3.91
 -26  -8   5    1.67    2.97
  26   8  -5   -1.24    3.18
  26   8  -5    2.07    2.62
 -24  -8   5   17.01    3.50
  24   8  -5   17.49    3.93
  24   8  -5   20.87    3.37
  22   8  -5    4.53    2.58
  22   8  -5    4.70    3.40
  20   8  -5   24.27    4.00
  20   8  -5   27.58    3.53
  18   8  -5   49.24    3.89
  18   8  -5   46.94    5.05
  16   8  -5   16.22    3.74
  16   8  -5   16.11    2.69
 -14  -8   5    6.16    2.31
  14   8  -5   -0.45    2.05
  14   8  -5    3.02    3.09
 -12  -8   5   22.14    3.15
  12   8  -5   21.45    2.83
  12   8  -5   18.56    3.43
 -10  -8   5   10.55    2.61
  10   8  -5    8.69    2.17
  10   8  -5   10.63    3.41
  -8  -8   5    1.22    2.49
   8   8  -5    0.03    1.73
   8   8  -5    4.38    3.03
   8   8  -5    0.58    1.50
  -6  -8   5    7.78    2.76
   6   8  -5    4.68    1.89
   6   8  -5    7.60    1.81
   6   8  -5    6.61    3.07
  -4  -8   5   10.26    2.88
   4   8  -5   11.40    1.86
   4   8  -5    9.75    2.06
   4   8  -5    6.68    2.80
  -2  -8   5    5.26    2.73
   2   8  -5    5.18    1.73
   2   8  -5    5.29    1.89
   2   8  -5    6.40    2.99
   0  -8   5   -0.29    2.58
   0   8  -5   -0.71    2.63
   0   8  -5   -1.40    1.50
   0   8  -5   -2.41    1.48
   0   8  -5    1.99    2.25
   2  -8   5   16.09    3.36
  -2   8  -5   16.23    2.87
  -2   8  -5   14.24    2.07
  -2   8  -5   14.95    2.22
  -2   8  -5   12.02    3.13
   4  -8   5   36.38    4.16
  -4   8  -5   36.87    4.09
  -4   8  -5   38.59    3.04
  -4   8  -5   37.86    2.99
  -4   8  -5   31.43    3.36
   6  -8   5   16.71    3.42
  -6   8  -5   17.80    3.01
  -6   8  -5   18.23    3.25
  -6   8  -5   18.70    2.38
   8  -8   5   66.79    5.11
  -8   8  -5   62.78    4.59
  -8   8  -5   65.70    4.33
  -8   8  -5   66.98    3.82
  10  -8   5   14.42    3.40
 -10   8  -5   10.23    2.75
 -10   8  -5   12.06    2.31
 -10   8  -5   12.97    3.03
  12  -8   5    1.40    2.84
 -12   8  -5    1.08    2.02
 -12   8  -5    1.88    2.54
  14  -8   5   34.19    4.48
 -14   8  -5   26.17    3.70
 -14   8  -5   27.94    3.55
  16  -8   5    0.14    2.96
 -16   8  -5    5.80    2.35
 -16   8  -5    6.05    2.95
  18  -8   5    3.72    3.43
 -18   8  -5    2.60    2.90
 -18   8  -5    1.87    2.42
  20  -8   5    3.53    3.58
 -20   8  -5   -1.07    2.32
 -20   8  -5    2.37    2.88
  22  -8   5   11.70    4.05
 -22   8  -5    9.05    3.41
 -22   8  -5    7.19    2.86
  24  -8   5   18.65    4.49
 -24   8  -5   16.47    3.41
 -24   8  -5   18.02    4.08
  26  -8   5    3.83    3.77
 -26   8  -5    0.55    3.25
  28  -8   5   22.63    4.67
 -28   8  -5   22.49    4.54
 -35  -9   5   11.18    3.84
  35   9  -5    6.20    3.65
 -33  -9   5    2.33    3.39
  33   9  -5    0.31    3.13
 -31  -9   5   15.81    3.96
  31   9  -5   14.54    4.30
  31   9  -5    7.55    3.41
 -29  -9   5    7.88    3.49
  29   9  -5    5.70    3.87
  29   9  -5    0.81    2.88
 -27  -9   5    5.01    3.05
  27   9  -5   12.87    4.17
  27   9  -5   10.55    3.32
 -25  -9   5   10.49    3.45
  25   9  -5   12.87    3.19
  25   9  -5   13.05    4.09
  23   9  -5    7.38    2.73
  23   9  -5    5.14    3.35
  21   9  -5   21.14    3.34
  21   9  -5   18.95    4.29
  19   9  -5    1.80    3.15
  19   9  -5   -1.10    2.32
  17   9  -5   -0.45    2.28
  17   9  -5   -2.86    2.76
  15   9  -5   27.72    3.20
  15   9  -5   20.62    4.03
 -13  -9   5   25.81    3.70
  13   9  -5   19.20    3.71
  13   9  -5   19.27    2.81
 -11  -9   5   18.07    3.10
  11   9  -5   15.90    3.62
  11   9  -5   16.83    2.64
  -9  -9   5   62.88    4.54
   9   9  -5   60.65    4.97
   9   9  -5   64.46    3.71
  -7  -9   5   11.43    2.97
   7   9  -5    7.29    3.30
  -5  -9   5   60.22    4.76
   5   9  -5   49.75    4.60
  -3  -9   5   16.01    3.36
   3   9  -5   17.63    3.47
  -1  -9   5   26.65    3.87
   1   9  -5   34.02    4.40
   1  -9   5    2.53    2.77
  -1   9  -5    7.11    2.59
  -1   9  -5   11.29    3.09
   3  -9   5   10.40    3.41
  -3   9  -5    7.52    2.62
  -3   9  -5    3.30    2.83
   5  -9   5   10.07    3.53
  -5   9  -5   12.13    2.93
  -5   9  -5    8.31    2.91
   7  -9   5    5.18    3.12
  -7   9  -5    2.05    2.58
  -7   9  -5    3.79    2.56
   9  -9   5   -1.03    3.18
  -9   9  -5    1.38    2.50
  -9   9  -5   -1.36    2.38
  11  -9   5   15.38    3.83
 -11   9  -5   20.13    3.47
  13  -9   5    4.13    3.52
 -13   9  -5    0.04    2.68
  15  -9   5   39.19    5.37
 -15   9  -5   39.31    4.47
  17  -9   5   21.21    4.47
 -17   9  -5   19.87    3.73
  19  -9   5    3.86    3.52
 -19   9  -5   -0.51    2.83
  21  -9   5   21.79    4.59
 -21   9  -5   27.72    4.28
  23  -9   5    4.69    3.79
 -23   9  -5    3.26    3.31
  25  -9   5    6.46    4.28
 -25   9  -5   -1.48    3.34
 -32 -10   5    1.76    3.47
 -30 -10   5   -1.71    3.30
  30  10  -5    2.74    3.64
 -28 -10   5   -2.93    3.02
  28  10  -5    4.92    4.00
 -26 -10   5    0.00    3.07
  26  10  -5    1.95    3.78
 -24 -10   5   -0.97    3.02
  24  10  -5    4.97    3.60
  22  10  -5   16.54    4.37
  20  10  -5    4.35    3.77
  18  10  -5   44.25    5.17
  16  10  -5    4.42    3.60
  14  10  -5   18.00    4.22
  12  10  -5    0.94    3.20
 -10 -10   5   12.51    3.09
  10  10  -5   12.43    3.55
  -8 -10   5    4.56    2.83
   8  10  -5    7.35    3.38
  -6 -10   5   -0.17    2.88
   6  10  -5    0.94    3.14
  -4 -10   5    1.98    2.99
   4  10  -5    3.36    3.11
  -2 -10   5   14.20    3.53
   2  10  -5    7.49    3.37
   0 -10   5    4.42    3.17
   0  10  -5    7.84    3.14
   2 -10   5    0.47    3.16
  -2  10  -5    0.28    2.66
  -2  10  -5    5.80    2.56
   4 -10   5    7.21    3.47
  -4  10  -5    3.48    2.62
  -4  10  -5    5.10    3.04
   6 -10   5    5.98    3.63
  -6  10  -5    2.42    2.76
  -6  10  -5    5.05    2.74
   8 -10   5    5.31    3.29
  -8  10  -5    2.67    2.62
  10 -10   5    1.89    3.53
 -10  10  -5    0.63    2.67
  12 -10   5    2.26    3.68
 -12  10  -5   -0.71    2.63
  14 -10   5    3.40    3.88
 -14  10  -5    4.56    3.08
  16 -10   5   -1.35    3.75
 -16  10  -5    0.27    2.99
  18 -10   5   -1.42    3.53
 -18  10  -5    3.17    3.03
  20 -10   5   11.86    4.44
 -20  10  -5    9.14    3.51
  22 -10   5    0.85    3.96
 -22  10  -5   -1.54    3.07
 -27 -11   5    0.11    3.38
  27  11  -5    6.31    3.80
 -25 -11   5   -4.18    3.00
  25  11  -5   -0.10    3.75
  23  11  -5   -1.03    3.81
  21  11  -5    6.75    3.95
  19  11  -5   17.26    4.58
  17  11  -5    4.32    3.80
  15  11  -5    0.99    3.58
  13  11  -5   -2.39    3.06
  11  11  -5    7.80    3.76
   9  11  -5   -1.48    2.97
  -7 -11   5    1.50    3.06
   7  11  -5    1.65    3.07
  -5 -11   5   -0.62    3.14
   5  11  -5    0.20    3.19
  -3 -11   5   -0.56    3.09
   3  11  -5    3.07    3.28
  -1 -11   5   -0.51    3.14
   1  11  -5    5.60    3.35
   1 -11   5   -0.65    3.17
  -1  11  -5   -0.89    3.02
   3 -11   5   -2.21    3.25
  -3  11  -5    4.01    3.05
   5 -11   5   -0.54    3.39
  -5  11  -5    3.66    3.00
  -5  11  -5    4.38    2.98
   7 -11   5    3.78    3.71
  -7  11  -5   -0.19    2.58
   9 -11   5   -1.77    3.26
  -9  11  -5    6.85    3.08
  11 -11   5   -0.46    3.70
 -11  11  -5    1.16    2.93
  13 -11   5    4.57    3.70
 -13  11  -5    0.10    2.96
  15 -11   5   -2.27    3.86
 -15  11  -5    1.84    3.03
  17 -11   5    1.24    3.74
 -17  11  -5    1.36    2.99
  19 -11   5    1.34    4.05
 -19  11  -5    3.55    3.35
  22  12  -5   -1.09    3.94
  20  12  -5    6.08    3.87
  18  12  -5   15.03    4.29
  16  12  -5    0.33    3.71
  14  12  -5    5.90    4.00
  12  12  -5    1.33    3.74
  10  12  -5    4.61    3.79
   8  12  -5    2.83    3.47
   6 -12  -5   10.07    3.59
  -6 -12   5    2.63    3.37
   6  12  -5    4.34    3.66
  -4 -12   5   22.32    4.36
   4  12  -5   22.20    4.35
  -2 -12   5    1.49    3.52
   2  12  -5    1.50    3.39
   0 -12   5   28.16    4.73
   0  12  -5   27.39    4.36
   2 -12   5   15.10    4.23
  -2  12  -5   24.72    4.27
   4 -12   5    2.87    3.76
   6 -12   5    6.87    3.74
   8 -12   5    2.17    3.92
  -8  12  -5    2.46    3.07
  10 -12   5    2.93    4.19
 -10  12  -5    6.04    3.19
  12 -12   5   15.16    4.58
 -12  12  -5   10.76    3.55
  14 -12   5    3.25    4.18
 -14  12  -5   -1.18    3.01
  15 -13  -5    0.82    3.63
  15  13  -5    3.16    3.98
  13 -13  -5    4.95    3.96
  13  13  -5   -0.29    3.53
  11 -13  -5   22.56    4.70
  11  13  -5   24.25    4.81
   9 -13  -5   18.16    4.44
   9  13  -5   11.82    4.25
   7 -13  -5    1.55    3.49
   7  13  -5    4.04    3.84
   5  13  -5   18.68    4.67
  -3 -13   5    5.71    3.95
   3  13  -5   15.49    4.33
  -1 -13   5    2.10    3.78
   1  13  -5   11.37    3.78
   1 -13   5   24.03    4.97
  -1  13  -5   19.65    4.35
   3 -13   5    0.76    3.56
   5 -13   5   -3.98    3.39
   7 -13   5   10.75    4.64
 -46   0   6   15.91    4.17
 -44   0   6    7.70    3.58
  44   0  -6    4.80    2.81
  42   0  -6   15.80    3.07
  42   0  -6   22.02    4.42
 -42   0   6   17.40    4.04
  40   0  -6   17.51    3.13
 -40   0   6   15.82    3.75
  40   0  -6    9.95    3.75
 -38   0   6   13.17    3.31
  38   0  -6   13.62    2.93
  38   0  -6   12.31    3.33
 -36   0   6    3.61    2.75
  36   0  -6    6.98    2.70
  36   0  -6   11.67    3.42
  34   0  -6   33.31    4.49
  34   0  -6   30.86    3.65
 -34   0   6   29.17    4.14
  32   0  -6   82.35    5.21
 -32   0   6  104.55    5.33
  32   0  -6   97.05    4.45
 -30   0   6   84.95    4.73
  30   0  -6   79.60    5.16
  30   0  -6   84.70    4.11
  28   0  -6  240.54    7.94
 -28   0   6  252.71    7.65
  28   0  -6  241.99    6.51
  28   0  -6  252.57    6.57
  26   0  -6  338.78    9.22
 -26   0   6  335.28    8.93
 -24   0   6    1.42    1.79
  24   0  -6    0.06    2.07
  22   0  -6  150.69    5.55
 -22   0   6  146.80    5.19
  20   0  -6   95.76    4.50
 -20   0   6  100.19    4.18
  18   0  -6   12.12    2.05
 -18   0   6   13.05    2.05
  16   0  -6   10.00    2.09
 -16   0   6    7.43    1.66
  14   0  -6   12.93    1.98
  14   0  -6   11.91    2.12
  12   0  -6   13.65    2.03
  12   0  -6    7.84    1.81
  10   0  -6   30.28    2.58
  10   0  -6   33.10    2.80
  -8   0   6  719.99   13.54
   8   0  -6  705.13   13.27
   8   0  -6  714.32   13.36
   6   0  -6  448.02    9.01
  -6   0   6  450.14    9.23
   4   0  -6    6.76    1.53
   4   0  -6    6.81    1.38
  -4   0   6    9.50    1.68
  -2   0   6  397.80    8.50
   2   0  -6  417.08    7.94
   2   0  -6  412.19    8.42
   0   0   6  525.68   10.38
   0   0  -6  512.98    9.79
   0   0  -6  516.93   10.28
   2   0   6    7.72    1.79
  -2   0  -6    6.84    1.76
  -2   0  -6    8.85    1.64
   4   0   6  133.77    4.29
  -4   0  -6  131.93    4.18
  -4   0  -6  126.94    4.49
   6   0   6    1.24    1.60
  -6   0  -6    0.13    1.61
  -6   0  -6    1.29    1.54
  -8   0  -6    5.52    1.87
   8   0   6    6.08    1.82
  -8   0  -6    4.39    1.79
  10   0   6    2.03    1.60
 -10   0  -6    2.03    1.79
 -10   0  -6    0.15    1.78
 -12   0  -6    7.66    2.17
 -12   0  -6    6.95    2.04
  12   0   6    8.24    1.93
 -14   0  -6   25.52    2.93
 -14   0  -6   27.07    3.07
  14   0   6   27.48    2.86
 -16   0  -6   24.09    3.40
  16   0   6   24.96    2.87
 -16   0  -6   20.65    2.91
  18   0   6   45.17    3.40
 -18   0  -6   50.66    3.93
 -18   0  -6   48.26    4.14
 -20   0  -6  295.38    8.88
  20   0   6  298.55    7.85
 -20   0  -6  297.36    9.20
 -22   0  -6   18.22    3.24
 -22   0  -6   20.02    3.27
 -24   0  -6   23.85    3.65
 -24   0  -6   27.29    3.94
 -26   0  -6   57.31    4.90
 -26   0  -6   53.72    5.11
 -28   0  -6    2.01    3.18
 -28   0  -6    4.92    3.24
 -30   0  -6   20.30    4.14
 -30   0  -6    8.44    3.63
 -32   0  -6   28.01    4.48
 -32   0  -6   28.16    4.64
 -34   0  -6   -5.21    3.31
 -34   0  -6   -1.83    3.40
 -45  -1   6   20.77    4.31
  45  -1  -6   16.43    3.55
 -45   1   6   29.67    4.77
 -45   1   6   26.46    4.61
  45   1  -6   24.06    3.02
  43  -1  -6    3.00    3.01
 -43  -1   6   -2.74    2.77
 -43   1   6    4.19    3.43
  43   1  -6    4.18    3.66
  43   1  -6    1.75    2.53
  41  -1  -6   46.42    5.41
  41  -1  -6   45.11    4.13
 -41  -1   6   56.69    5.56
  41   1  -6   57.78    3.89
 -41   1   6   55.14    5.40
  41   1  -6   52.22    5.63
  39  -1  -6   92.98    5.96
  39  -1  -6   94.85    5.15
 -39  -1   6   97.90    6.36
 -39   1   6   95.27    5.80
  39   1  -6   99.02    4.49
  39   1  -6  100.13    6.50
  37  -1  -6    5.58    2.86
 -37  -1   6    3.53    3.11
  37  -1  -6    5.49    3.21
  37   1  -6    3.83    2.32
  37   1  -6    4.18    3.06
 -37   1   6    6.34    3.16
 -35  -1   6   43.06    4.27
  35  -1  -6   43.57    4.18
  35  -1  -6   35.67    4.45
  35   1  -6   44.30    4.48
  35   1  -6   43.45    3.45
 -35   1   6   36.58    4.37
  33  -1  -6    8.04    3.14
 -33  -1   6   12.51    2.96
  33  -1  -6   12.55    2.84
 -33   1   6   13.81    3.16
  33   1  -6   11.87    2.54
  33   1  -6   10.28    3.20
 -31  -1   6    1.68    2.40
  31  -1  -6    2.80    2.67
  31  -1  -6   -1.30    2.24
 -31   1   6   -2.12    2.33
  31   1  -6    0.79    2.50
  31   1  -6    0.11    2.09
  29  -1  -6    7.09    2.70
  29  -1  -6    3.25    2.34
 -29  -1   6    2.80    2.44
 -29   1   6    5.98    2.36
  29   1  -6    4.59    2.67
  29   1  -6    2.26    2.13
  29   1  -6    4.92    2.26
 -27  -1   6   40.64    3.83
  27  -1  -6   39.22    3.83
  27   1  -6   39.00    3.78
 -27   1   6   36.91    3.59
  27   1  -6   32.71    3.07
  27   1  -6   32.33    3.54
 -25  -1   6   10.81    2.43
  25  -1  -6   10.05    2.33
 -25   1   6    7.15    2.28
  25   1  -6    9.57    2.51
  23  -1  -6    9.84    2.35
 -23  -1   6    8.92    2.25
 -23   1   6    4.28    1.95
  23   1  -6    8.75    2.39
 -21  -1   6   12.00    2.30
  21  -1  -6   13.24    2.13
 -21   1   6   13.67    2.13
  21   1  -6    8.12    2.17
 -19  -1   6  103.50    4.30
  19  -1  -6  100.60    4.32
 -19   1   6  100.28    3.97
  19   1  -6   97.21    4.49
  17  -1  -6  138.45    4.67
 -17   1   6  135.16    4.33
  17   1  -6  132.60    4.78
  15  -1  -6   34.57    2.83
  15   1  -6   37.32    3.28
  15   1  -6   28.32    2.79
 -15   1   6   31.80    2.43
  13  -1  -6  291.53    6.83
  13  -1  -6  286.06    6.76
  13   1  -6  290.38    6.93
 -13   1   6  285.55    6.20
  13   1  -6  294.36    7.06
  11  -1  -6    2.42    1.51
 -11  -1   6   -1.94    1.32
  11  -1  -6    0.94    1.37
  11   1  -6   -1.27    1.45
  11   1  -6   -1.14    1.49
   9  -1  -6  302.89    6.67
   9  -1  -6  305.27    6.74
  -9  -1   6  302.80    7.03
   9   1  -6  301.69    6.97
   9   1  -6  306.91    6.92
   7  -1  -6  300.16    6.70
   7  -1  -6  312.26    6.68
  -7  -1   6  311.60    7.06
   7   1  -6  309.26    7.04
   5  -1  -6  365.35    7.66
   5  -1  -6  378.00    6.93
  -5  -1   6  368.08    8.06
   5   1  -6  380.37    8.00
   5   1  -6  375.81    7.65
   3  -1  -6   37.89    2.55
  -3  -1   6   42.52    2.81
   3  -1  -6   41.15    2.11
  -3   1   6   43.94    2.62
   3   1  -6   44.50    2.62
   3   1  -6   42.65    2.61
   1  -1  -6  207.71    5.23
   1  -1  -6  204.48    4.65
  -1   1   6  214.70    5.37
   1   1  -6  213.99    5.28
   1   1  -6  208.80    5.38
  -1  -1  -6   32.48    2.31
  -1  -1  -6   28.02    2.57
   1  -1   6   34.12    2.73
  -1   1  -6   24.74    2.33
  -1   1  -6   32.79    2.55
   1   1   6   26.86    2.44
   3  -1   6  164.17    5.06
  -3  -1  -6  162.92    4.83
  -3  -1  -6  162.01    4.35
  -3   1  -6  161.22    4.69
  -3   1  -6  165.08    4.89
   3   1   6  162.20    4.54
  -5  -1  -6   24.62    2.74
   5  -1   6   25.07    2.86
  -5  -1  -6   23.12    2.41
   5   1   6   29.94    2.53
  -5   1  -6   30.68    2.99
  -5   1  -6   22.90    2.52
  -7  -1  -6  220.35    6.12
   7  -1   6  227.67    6.19
  -7  -1  -6  226.11    5.85
  -7   1  -6  228.94    6.28
   7   1   6  232.48    5.69
  -7   1  -6  220.78    6.22
   9  -1   6   94.43    4.02
  -9  -1  -6   86.51    3.84
  -9  -1  -6   88.02    3.94
   9   1   6   84.41    3.41
  -9   1  -6   86.40    3.87
  -9   1  -6   90.40    4.09
  11  -1   6   39.49    3.15
 -11  -1  -6   43.39    3.22
 -11  -1  -6   39.81    3.40
 -11   1  -6   41.18    3.18
 -11   1  -6   43.10    3.15
  11   1   6   37.08    2.61
 -13  -1  -6  170.40    5.94
 -13  -1  -6  171.00    5.72
  13  -1   6  174.27    5.50
  13   1   6  162.70    4.74
 -13   1  -6  158.48    5.77
 -13   1  -6  165.16    5.71
  15  -1   6    1.61    2.01
 -15  -1  -6    2.54    1.95
 -15  -1  -6    1.68    1.95
 -15   1  -6    2.69    2.00
 -15   1  -6    0.90    2.13
  15   1   6    1.32    1.54
 -17  -1  -6   22.39    3.20
 -17  -1  -6   23.93    3.41
  17  -1   6   21.81    3.02
 -17   1  -6   22.42    3.22
  17   1   6   25.86    2.69
 -17   1  -6   24.09    3.16
  19  -1   6   52.21    3.73
 -19  -1  -6   41.32    4.06
 -19  -1  -6   47.76    4.02
  19   1   6   48.13    3.20
 -19   1  -6   38.46    3.79
 -19   1  -6   48.31    4.31
  21  -1   6    2.58    2.36
 -21  -1  -6    6.75    2.54
 -21  -1  -6    7.27    2.88
 -21   1  -6    1.30    2.23
 -21   1  -6    7.63    2.95
 -23  -1  -6   -2.03    2.28
 -23  -1  -6    4.37    2.63
  23  -1   6    0.70    2.37
 -23   1  -6   -0.40    2.45
 -23   1  -6   -1.86    2.63
 -25  -1  -6    8.68    2.97
 -25  -1  -6    8.14    3.02
 -25   1  -6    9.53    3.38
 -25   1  -6    4.23    2.98
 -27  -1  -6   12.13    3.32
 -27  -1  -6   25.33    4.11
 -27   1  -6   14.07    3.70
 -27   1  -6   18.61    3.53
 -29  -1  -6   19.69    3.79
 -29  -1  -6   16.71    3.94
 -29   1  -6   16.45    3.82
 -29   1  -6   24.40    4.31
 -31  -1  -6    2.15    3.21
 -31  -1  -6    6.05    3.25
 -31   1  -6    3.35    3.45
 -31   1  -6   -0.97    2.85
 -33  -1  -6   78.87    6.41
 -33  -1  -6   76.08    6.37
 -33   1  -6   75.49    6.02
 -33   1  -6   79.81    6.63
 -35  -1  -6   12.88    4.25
 -35  -1  -6   14.15    4.17
 -35   1  -6    8.75    3.54
 -35   1  -6   12.43    4.35
  44  -2  -6   -1.32    3.20
 -44  -2   6   -2.02    3.21
 -44   2   6    2.94    3.41
 -44   2   6    3.83    3.44
  44   2  -6   -5.24    3.05
 -42  -2   6   -1.35    3.06
  42  -2  -6    2.76    3.01
 -42   2   6    4.08    3.24
  42   2  -6    0.02    1.91
  42   2  -6    6.84    3.81
  40  -2  -6   19.40    3.52
 -40  -2   6   19.77    4.17
  40   2  -6   18.13    2.44
  40   2  -6   21.61    4.12
 -40   2   6   21.61    3.73
  38  -2  -6   18.50    3.51
 -38  -2   6   21.28    3.92
  38  -2  -6   20.43    4.00
 -38   2   6   19.48    3.64
  38   2  -6   16.08    3.86
  38   2  -6   18.41    2.44
  36  -2  -6    8.38    3.02
  36  -2  -6    9.23    3.08
 -36  -2   6    7.96    3.05
  36   2  -6    8.06    3.55
  36   2  -6    9.83    2.21
 -36   2   6    7.71    3.12
  34  -2  -6    1.89    2.79
  34  -2  -6    4.65    2.75
 -34  -2   6   10.90    3.13
  34   2  -6    6.48    2.24
 -34   2   6    7.12    2.95
  34   2  -6    6.01    3.15
 -32  -2   6   31.99    4.17
  32  -2  -6   30.15    3.74
  32  -2  -6   34.31    4.13
 -32   2   6   32.83    3.67
  32   2  -6   30.02    3.96
  32   2  -6   38.54    3.07
  30  -2  -6    7.64    2.75
 -30  -2   6    1.09    2.49
  30  -2  -6    5.01    2.40
 -30   2   6    5.38    2.54
  30   2  -6    7.53    2.46
  30   2  -6    1.37    2.34
  30   2  -6    2.63    2.00
  28  -2  -6   48.88    4.14
  28  -2  -6   45.15    3.77
 -28  -2   6   47.56    4.16
  28   2  -6   46.43    3.18
  28   2  -6   51.71    4.01
 -28   2   6   44.71    3.55
  28   2  -6   36.32    3.79
 -26  -2   6   86.20    4.74
  26  -2  -6   84.66    4.60
  26   2  -6   67.49    4.68
  26   2  -6   87.02    4.69
 -26   2   6   89.47    4.49
  26   2  -6   88.54    3.55
 -24  -2   6    0.08    1.76
  24  -2  -6    0.24    1.97
  24   2  -6   -1.38    2.07
 -24   2   6   -2.16    1.82
 -22  -2   6  131.51    5.04
  22  -2  -6  127.25    4.77
  22   2  -6  129.57    5.44
 -22   2   6  134.94    4.79
 -20  -2   6  142.10    4.97
  20  -2  -6  133.41    4.81
  20   2  -6  136.12    5.19
 -20   2   6  137.85    4.58
  18  -2  -6   24.97    2.73
  18   2  -6   26.39    2.88
 -18   2   6   30.70    2.49
  16  -2  -6   34.03    2.67
  16   2  -6   29.00    2.89
 -16   2   6   31.19    2.48
 -14  -2   6   94.72    3.66
  14  -2  -6  100.68    3.64
 -14   2   6   91.97    3.21
  14   2  -6  103.47    4.42
  14   2  -6   94.81    3.88
  12  -2  -6    1.31    1.48
 -12  -2   6   -0.29    1.55
  12  -2  -6    1.61    1.48
  12   2  -6    0.94    1.67
 -12   2   6    2.26    1.21
  12   2  -6   -0.86    1.68
  10  -2  -6   39.60    2.49
  10  -2  -6   43.67    2.52
 -10  -2   6   38.86    2.89
 -10   2   6   37.35    1.85
  10   2  -6   40.56    3.19
  10   2  -6   37.50    2.68
   8  -2  -6   21.32    2.30
   8  -2  -6   20.15    2.11
  -8  -2   6   18.02    2.16
   8   2  -6   16.44    2.29
   8   2  -6   18.03    2.38
   6  -2  -6  372.75    7.61
  -6  -2   6  373.64    8.29
   6   2  -6  382.52    8.08
   6   2  -6  382.56    8.29
   6   2  -6  385.04    8.10
   4  -2  -6  144.05    3.94
   4  -2  -6  138.22    2.99
  -4  -2   6  139.06    4.49
   4   2  -6  143.22    4.48
   4   2  -6  141.37    4.49
  -2  -2   6   86.30    3.88
   2  -2  -6   82.64    3.07
   2  -2  -6   82.06    2.35
   2   2  -6   82.92    3.54
   0  -2  -6   93.42    2.74
   0  -2  -6   93.98    3.39
   0  -2   6   94.99    4.09
   0   2  -6   92.66    3.59
   0   2  -6   94.68    3.77
  -2  -2  -6    0.33    1.13
   2  -2   6    2.57    1.91
  -2  -2  -6    1.53    1.43
  -2   2  -6    0.92    1.52
  -2   2  -6   -1.69    1.48
  -4  -2  -6   26.53    2.58
   4  -2   6   21.90    3.05
  -4  -2  -6   24.66    2.26
   4   2   6   27.15    2.32
  -4   2  -6   21.95    2.54
  -4   2  -6   20.70    2.90
   6  -2   6  113.95    4.43
  -6  -2  -6  114.92    3.81
  -6  -2  -6  111.61    4.22
  -6   2  -6  118.93    4.55
   6   2   6  120.47    3.65
  -6   2  -6  120.24    4.38
  -8  -2  -6    7.75    1.91
  -8  -2  -6    6.07    1.73
   8  -2   6    8.36    2.20
  -8   2  -6    6.76    1.96
   8   2   6   10.00    1.56
  -8   2  -6    8.53    2.03
 -10  -2  -6    1.19    1.68
  10  -2   6    3.56    1.86
 -10  -2  -6    1.81    1.63
 -10   2  -6    2.53    1.81
 -10   2  -6   -1.01    1.72
  10   2   6    3.35    1.32
  12  -2   6   45.14    3.57
 -12  -2  -6   41.88    3.19
 -12  -2  -6   41.17    3.25
 -12   2  -6   39.74    3.51
  12   2   6   45.20    2.44
 -12   2  -6   48.60    3.46
  14  -2   6   16.65    2.62
 -14  -2  -6   14.65    2.46
 -14  -2  -6   21.34    3.04
 -14   2  -6   13.39    2.65
 -14   2  -6   20.29    2.92
  14   2   6   16.60    2.07
  16  -2   6   56.96    3.99
 -16  -2  -6   40.94    3.81
 -16  -2  -6   50.18    3.83
  16   2   6   51.93    2.65
 -16   2  -6   44.69    4.00
 -16   2  -6   45.65    3.76
 -18  -2  -6    8.18    2.68
  18  -2   6    7.24    2.57
 -18  -2  -6   11.09    2.55
 -18   2  -6    7.97    2.43
 -18   2  -6    8.74    2.78
 -20  -2  -6   39.56    4.22
 -20  -2  -6   39.48    4.07
  20  -2   6   38.43    4.13
 -20   2  -6   34.95    4.10
 -20   2  -6   41.22    4.00
 -22  -2  -6   -2.06    2.32
  22  -2   6    0.79    2.58
 -22  -2  -6   -0.83    2.49
 -22   2  -6    0.96    2.48
 -22   2  -6    1.36    2.59
 -24  -2  -6   26.20    3.87
  24  -2   6   24.79    3.46
 -24  -2  -6   16.62    3.34
 -24   2  -6   27.58    3.90
 -24   2  -6   30.55    4.13
 -26  -2  -6   39.24    4.78
 -26  -2  -6   39.88    4.67
  26  -2   6   41.28    4.12
 -26   2  -6   34.45    4.76
 -26   2  -6   40.18    4.35
 -28  -2  -6    4.79    2.94
 -28  -2  -6    1.40    3.11
 -28   2  -6    2.78    3.30
 -28   2  -6    1.65    2.73
 -30  -2  -6   12.17    3.58
 -30  -2  -6    7.71    3.51
 -30   2  -6    6.30    3.41
 -30   2  -6   10.24    3.70
 -32  -2  -6    6.85    3.37
 -32  -2  -6    9.70    3.81
 -32   2  -6    8.36    3.66
 -32   2  -6    5.78    3.53
 -34  -2  -6    3.97    3.58
 -34  -2  -6    4.08    3.32
 -34   2  -6    9.30    3.67
 -34   2  -6    0.07    3.25
 -45   3   6    1.04    3.50
  43  -3  -6    1.21    3.22
 -43  -3   6    2.56    3.58
 -43   3   6    3.89    3.27
  43   3  -6   -1.70    3.48
 -43   3   6    6.30    3.38
  41  -3  -6   14.71    3.77
 -41  -3   6   14.33    3.98
 -41   3   6   10.81    3.58
 -41   3   6   11.20    3.67
  41   3  -6   11.04    3.81
 -39  -3   6   18.69    3.95
  39  -3  -6   14.36    3.50
  39   3  -6   16.41    4.04
 -39   3   6   21.48    3.81
 -37  -3   6    1.33    2.94
  37  -3  -6    6.84    3.10
 -37   3   6    2.03    2.56
  37   3  -6    1.92    3.12
 -35  -3   6    5.30    3.11
  35  -3  -6    5.36    2.97
  35  -3  -6    8.45    3.05
 -35   3   6    7.65    3.01
  35   3  -6    7.99    1.72
  35   3  -6   10.02    3.44
  33  -3  -6    8.79    3.01
  33  -3  -6    4.73    2.90
 -33  -3   6   10.33    2.94
  33   3  -6   10.03    1.80
  33   3  -6    9.72    3.29
  33   3  -6   10.17    2.99
 -33   3   6    5.37    2.68
 -31  -3   6    8.23    2.77
  31  -3  -6    4.28    2.66
  31  -3  -6    3.29    2.77
 -31   3   6    4.67    2.49
  31   3  -6    2.59    2.56
  31   3  -6    6.83    2.75
  31   3  -6    4.12    1.70
 -29  -3   6   14.92    2.90
  29  -3  -6   13.61    2.90
  29  -3  -6    8.00    2.79
  29   3  -6   15.06    3.04
  29   3  -6   14.78    1.93
 -29   3   6   11.30    2.73
  29   3  -6   11.24    2.77
  27  -3  -6   12.15    2.59
 -27  -3   6   12.02    2.66
 -27   3   6   13.35    2.64
  27   3  -6   13.97    2.92
  27   3  -6   15.34    1.97
  27   3  -6   10.61    2.89
 -25  -3   6   13.67    2.63
  25  -3  -6   14.60    2.66
 -25   3   6   14.90    2.53
  25   3  -6   18.11    2.90
  25   3  -6   14.74    2.91
  25   3  -6   12.86    1.81
 -23  -3   6    4.12    2.12
  23  -3  -6    3.30    1.98
 -23   3   6    3.96    1.89
  23   3  -6    5.10    2.13
  23   3  -6    4.24    1.49
  21  -3  -6   47.57    3.21
 -21   3   6   48.33    3.08
  21   3  -6   51.09    3.61
  19  -3  -6   10.07    1.95
 -19   3   6    7.56    1.69
  19   3  -6    4.44    1.92
 -17  -3   6    1.00    1.52
  17  -3  -6    0.57    1.44
 -17   3   6    1.51    1.33
  17   3  -6    1.00    1.79
 -15  -3   6   44.19    2.93
  15  -3  -6   41.74    2.73
  15   3  -6   40.61    3.04
  15   3  -6   48.65    3.32
 -15   3   6   39.25    2.34
  13  -3  -6   83.84    3.21
 -13  -3   6   92.03    3.65
  13   3  -6   92.01    4.13
 -13   3   6   91.16    2.97
  13   3  -6   85.86    3.89
  11  -3  -6    0.12    1.33
  11  -3  -6    2.14    1.41
 -11  -3   6   -1.11    1.56
  11   3  -6    1.04    1.67
  11   3  -6    0.89    1.76
 -11   3   6   -0.42    0.94
  -9  -3   6    4.18    1.77
   9  -3  -6    0.14    1.25
   9  -3  -6   -0.16    1.26
   9   3  -6    0.84    1.44
   9   3  -6   -2.48    1.62
  -9   3   6    0.59    0.77
   7  -3  -6   24.12    2.16
  -7  -3   6   24.66    2.91
   7  -3  -6   29.97    2.08
   7   3  -6   25.50    2.48
   7   3  -6   19.98    2.65
   5  -3  -6   13.48    1.85
  -5  -3   6   17.72    2.33
   5   3  -6   15.11    2.11
   5   3  -6   13.65    1.90
   5   3  -6   14.85    2.09
  -3  -3   6   -0.63    1.85
   3  -3  -6   -0.30    1.12
   3   3  -6    1.90    1.55
   3   3  -6    1.71    1.67
   1  -3  -6    8.41    1.46
   1  -3  -6   11.22    1.27
  -1  -3   6    8.39    2.09
   1   3  -6   11.34    2.05
   1   3  -6    9.09    1.87
  -1  -3  -6   16.89    2.01
  -1  -3  -6   22.09    1.65
   1  -3   6   22.09    2.80
  -1   3  -6   24.25    2.58
  -1   3  -6   23.12    2.64
  -3  -3  -6   -0.16    1.08
   3  -3   6    2.03    2.09
  -3  -3  -6    1.13    1.33
  -3   3  -6    1.67    1.64
  -3   3  -6    2.93    1.74
   5  -3   6   31.46    3.48
  -5  -3  -6   35.27    2.43
  -5  -3  -6   26.88    2.49
  -5   3  -6   28.67    2.99
  -5   3  -6   26.17    2.82
   7  -3   6   58.24    3.68
  -7  -3  -6   69.02    3.11
  -7  -3  -6   61.44    3.32
  -7   3  -6   63.31    3.65
  -7   3  -6   60.59    3.86
   9  -3   6    3.92    2.18
  -9  -3  -6    1.83    1.70
  -9  -3  -6    4.62    1.70
  -9   3  -6    4.93    1.94
  -9   3  -6    3.81    2.01
  11  -3   6   20.82    2.97
 -11  -3  -6   29.51    3.04
 -11  -3  -6   26.05    2.74
 -11   3  -6   23.98    3.12
 -11   3  -6   21.66    2.82
 -13  -3  -6   38.83    3.23
 -13  -3  -6   38.86    3.16
  13  -3   6   40.25    3.46
 -13   3  -6   43.11    3.43
 -13   3  -6   36.74    3.46
  15  -3   6   -0.03    2.29
 -15  -3  -6   -0.46    1.98
 -15  -3  -6    3.52    2.11
 -15   3  -6   -1.52    2.05
 -15   3  -6   -0.50    2.26
 -17  -3  -6    6.53    2.41
  17  -3   6    2.21    2.49
 -17  -3  -6    5.51    2.47
 -17   3  -6    5.17    2.34
 -17   3  -6    3.97    2.61
 -19  -3  -6    0.87    2.36
 -19  -3  -6    1.30    2.42
  19  -3   6    2.20    2.49
 -19   3  -6    0.89    2.61
 -19   3  -6    2.87    2.35
 -21  -3  -6    7.21    2.83
  21  -3   6    6.93    2.75
 -21  -3  -6   10.87    2.96
 -21   3  -6    6.33    2.77
 -21   3  -6    8.62    2.98
  23  -3   6   -1.73    2.44
 -23  -3  -6    0.66    2.64
 -23  -3  -6   -4.22    2.48
 -23   3  -6   -2.06    2.60
 -23   3  -6    1.08    2.89
 -25  -3  -6   25.87    3.90
 -25  -3  -6   21.62    3.80
  25  -3   6   25.24    3.86
 -25   3  -6   23.59    3.77
 -25   3  -6   23.81    3.86
 -27  -3  -6    1.19    2.98
 -27  -3  -6    7.46    3.30
  27  -3   6   -1.16    2.94
 -27   3  -6    2.56    2.88
 -27   3  -6    1.84    3.14
 -29  -3  -6   -2.04    3.04
 -29  -3  -6    0.33    2.93
 -29   3  -6    0.46    2.93
 -29   3  -6    4.80    3.10
 -31  -3  -6   -0.97    2.89
 -31  -3  -6   -0.55    3.20
 -31   3  -6    0.95    3.35
 -31   3  -6   -2.51    3.03
 -33  -3  -6   14.69    4.10
 -33  -3  -6   12.73    3.98
 -33   3  -6   10.55    4.19
 -33   3  -6   17.74    4.07
  44  -4  -6    7.70    3.66
 -44  -4   6    4.84    4.05
 -44   4   6    5.51    3.59
 -44   4   6    5.72    3.45
  44   4  -6    5.77    3.96
 -42  -4   6   -2.30    3.51
  42  -4  -6    4.29    3.52
 -42   4   6   -2.03    2.99
 -42   4   6   -0.50    3.11
  42   4  -6   -3.42    3.17
 -40  -4   6   10.77    3.87
  40  -4  -6   12.33    3.71
 -40   4   6   15.72    3.48
 -40   4   6    8.19    3.32
  40   4  -6    6.72    3.71
 -38  -4   6    2.90    3.30
  38  -4  -6    9.00    3.43
 -38   4   6    4.40    3.01
 -38   4   6    6.39    3.16
  38   4  -6   12.78    3.82
 -36  -4   6   -0.88    3.03
  36  -4  -6    0.26    2.97
 -36   4   6   -4.23    2.51
  36   4  -6    0.60    3.00
 -34  -4   6    4.91    3.17
  34  -4  -6   10.15    3.23
 -34   4   6   10.28    2.98
  34   4  -6    8.94    3.04
  34   4  -6   12.07    3.55
  32  -4  -6    0.35    2.81
 -32  -4   6   -2.58    2.36
  32  -4  -6    2.98    2.53
 -32   4   6    1.55    2.38
  32   4  -6    0.33    2.80
  32   4  -6    3.25    2.76
  30  -4  -6    3.16    2.75
  30  -4  -6    2.55    2.44
 -30  -4   6    2.18    2.67
  30   4  -6    0.68    2.44
 -30   4   6    3.14    2.36
  30   4  -6    3.56    2.90
 -28  -4   6   -1.87    2.22
  28  -4  -6    0.86    2.13
  28  -4  -6   -1.92    2.47
  28   4  -6   -2.23    2.45
 -28   4   6   -3.09    2.12
  28   4  -6   -3.52    2.19
 -26  -4   6    0.45    2.28
  26  -4  -6    1.68    2.08
  26   4  -6   -0.10    2.47
 -26   4   6    1.03    2.10
  26   4  -6    0.34    2.40
 -24  -4   6   16.06    2.90
  24  -4  -6   17.33    2.54
  24   4  -6   17.94    1.67
  24   4  -6   21.98    3.38
  24   4  -6   15.84    2.77
 -24   4   6   19.34    2.52
  22  -4  -6   31.50    3.06
  22   4  -6   25.92    1.84
  22   4  -6   31.32    3.64
 -22   4   6   30.93    2.91
  22   4  -6   34.50    4.11
  20  -4  -6    2.88    1.68
  20   4  -6    0.03    1.14
 -20   4   6    0.47    1.51
  20   4  -6   -3.01    1.91
  18  -4  -6   14.65    1.99
 -18  -4   6   12.74    1.90
  18   4  -6   12.72    2.40
 -18   4   6   11.09    1.71
 -16  -4   6   19.32    2.24
  16  -4  -6   20.83    2.20
  16   4  -6   18.34    2.54
 -16   4   6   17.17    2.04
  14  -4  -6   65.66    2.83
 -14  -4   6   70.61    3.29
  14   4  -6   69.75    2.57
  14   4  -6   68.78    3.88
  14   4  -6   63.62    3.55
 -14   4   6   71.71    2.64
 -12  -4   6   -1.57    1.62
  12  -4  -6    1.18    1.14
  12   4  -6    1.80    1.80
  12   4  -6   -0.98    1.57
 -12   4   6    1.87    0.95
  12   4  -6    1.08    1.26
 -10  -4   6   29.63    2.91
  10  -4  -6   31.00    2.02
  10   4  -6   29.45    2.73
  10   4  -6   30.68    2.77
 -10   4   6   28.98    1.36
  10   4  -6   28.42    2.32
   8  -4  -6   49.76    2.28
  -8  -4   6   49.86    3.36
   8  -4  -6   51.90    2.32
   8   4  -6   53.95    2.69
   8   4  -6   56.20    3.38
   8   4  -6   55.60    3.13
   6  -4  -6    6.92    1.24
  -6  -4   6    6.47    1.93
   6  -4  -6    7.09    1.25
   6   4  -6    7.05    1.59
   6   4  -6    5.15    1.78
   6   4  -6    3.22    1.62
  -4  -4   6    7.15    2.04
   4  -4  -6   10.08    1.29
   4   4  -6   12.30    2.17
   4   4  -6    9.93    1.83
   4   4  -6   12.11    1.98
   2  -4  -6   21.22    1.87
  -2  -4   6   26.91    2.93
   2   4  -6   20.41    2.52
   2   4  -6   24.39    2.56
   0  -4   6    2.40    2.00
   0  -4  -6    0.61    1.13
   0  -4  -6    0.29    0.78
   0   4  -6    2.86    1.61
   0   4  -6    1.90    1.68
  -2  -4  -6   55.74    2.22
   2  -4   6   60.99    3.78
  -2  -4  -6   60.35    2.71
  -2   4  -6   56.97    3.59
  -2   4  -6   60.53    3.26
  -4  -4  -6   12.82    1.73
  -4  -4  -6   11.46    1.44
   4  -4   6   12.88    2.51
  -4   4  -6   14.13    2.12
  -4   4  -6   12.80    2.31
  -6  -4  -6   21.66    2.10
   6  -4   6   20.97    2.94
  -6  -4  -6   20.95    2.22
  -6   4  -6   20.25    2.59
  -6   4  -6   21.37    2.77
   8  -4   6   50.75    3.71
  -8  -4  -6   53.64    2.88
  -8  -4  -6   49.29    3.02
  -8   4  -6   44.12    3.09
  -8   4  -6   41.51    3.36
  10  -4   6    3.08    2.33
 -10  -4  -6    0.84    1.56
 -10  -4  -6   -0.19    1.62
 -10   4  -6    1.30    1.83
 -10   4  -6    0.13    2.04
 -12  -4  -6   23.98    2.94
 -12  -4  -6   24.66    2.95
  12  -4   6   21.33    3.19
 -12   4  -6   21.44    2.77
 -12   4  -6   26.53    3.18
 -14  -4  -6    2.80    2.01
  14  -4   6    3.14    2.54
 -14  -4  -6    3.16    1.97
 -14   4  -6    5.13    2.41
 -14   4  -6    4.39    2.21
 -16  -4  -6   -3.25    1.77
 -16  -4  -6    0.81    2.10
  16  -4   6   -0.18    2.54
 -16   4  -6    0.59    2.04
 -16   4  -6    2.37    2.29
  18  -4   6    0.80    2.44
 -18  -4  -6    5.31    2.54
 -18  -4  -6    9.01    2.65
 -18   4  -6   11.47    2.84
 -18   4  -6    5.60    2.86
 -20  -4  -6    0.68    2.48
 -20  -4  -6    2.68    2.61
  20  -4   6    2.75    2.75
 -20   4  -6   -0.15    2.46
 -20   4  -6    0.86    2.47
  22  -4   6    1.21    2.75
 -22  -4  -6    3.20    2.63
 -22  -4  -6    3.78    2.64
 -22   4  -6   -1.19    2.31
 -22   4  -6    3.48    2.90
  24  -4   6   -0.73    2.76
 -24  -4  -6   -1.84    2.63
 -24  -4  -6    4.27    2.57
 -24   4  -6    0.96    2.61
 -24   4  -6    3.58    3.03
 -26  -4  -6    8.42    3.35
 -26  -4  -6    8.82    3.24
  26  -4   6    5.92    3.27
 -26   4  -6    9.02    3.34
 -26   4  -6    7.39    3.50
  28  -4   6   10.97    3.53
 -28  -4  -6    7.20    3.18
 -28  -4  -6   11.13    3.37
 -28   4  -6    9.27    3.44
 -28   4  -6   13.66    3.60
 -30  -4  -6   -0.57    3.17
 -30  -4  -6    1.03    2.98
 -30   4  -6   -1.90    3.00
 -30   4  -6    3.34    3.19
 -32  -4  -6    5.47    3.30
 -32  -4  -6    7.78    3.80
 -32   4  -6    9.44    3.53
 -32   4  -6    3.75    3.75
 -34  -4  -6    7.04    3.80
 -34  -4  -6    3.47    3.62
 -34   4  -6    8.78    3.94
 -34   4  -6    7.09    4.05
 -43  -5   6    1.72    3.77
 -43   5   6    0.53    2.85
  43   5  -6    3.34    3.48
 -41  -5   6    0.94    3.66
  41  -5  -6   -1.65    3.51
  41   5  -6    0.10    3.26
 -41   5   6    2.52    3.14
 -41   5   6   -3.51    2.88
  39  -5  -6    1.98    3.46
 -39  -5   6    2.96    3.54
  39   5  -6   -1.38    2.94
 -39   5   6    2.75    3.07
 -39   5   6   -2.73    2.57
 -37  -5   6    1.69    3.02
  37  -5  -6   -4.02    3.14
  37   5  -6    1.18    3.26
 -37   5   6    3.78    2.76
 -37   5   6    0.00    2.75
 -35  -5   6    1.62    3.11
  35  -5  -6    0.28    3.10
  35   5  -6    4.06    3.27
 -35   5   6    2.51    2.75
 -35   5   6    3.35    2.69
  35   5  -6    6.03    3.30
  33  -5  -6   -2.84    2.92
 -33  -5   6    0.71    2.89
 -33   5   6   -2.30    2.30
  33   5  -6    4.60    3.10
  33   5  -6   -2.97    2.98
  31  -5  -6    5.04    3.07
 -31  -5   6   -4.40    2.64
  31   5  -6    1.66    2.81
 -31   5   6    3.13    2.38
  31   5  -6    1.72    2.93
 -29  -5   6    4.05    2.62
  29  -5  -6    2.28    2.72
  29   5  -6   -2.08    2.76
 -29   5   6    0.30    2.14
  29   5  -6   -4.41    2.40
 -27  -5   6   -1.37    2.28
  27  -5  -6    2.48    2.26
 -27   5   6    5.30    2.18
  27   5  -6    3.31    2.63
  27   5  -6    4.99    2.97
  25  -5  -6    1.70    1.97
 -25  -5   6   -3.05    2.12
  25   5  -6   -3.01    2.34
 -25   5   6   -1.86    1.88
  25   5  -6    0.63    2.53
  23  -5  -6   18.66    2.72
  23   5  -6   16.58    3.00
 -23   5   6   20.49    2.77
  23   5  -6   13.64    3.32
 -21  -5   6    3.75    1.68
  21  -5  -6    0.67    1.72
  21   5  -6   -0.73    2.49
 -21   5   6    2.62    1.67
  21   5  -6    1.66    2.06
 -19  -5   6    4.98    1.75
  19  -5  -6    4.42    1.65
  19   5  -6    3.97    2.09
 -19   5   6    4.21    1.64
  19   5  -6    5.41    2.94
 -17  -5   6    1.02    1.68
  17  -5  -6    0.65    1.31
 -17   5   6    0.48    1.31
  17   5  -6   -0.44    1.90
  15  -5  -6    8.34    1.39
 -15  -5   6    6.15    1.91
 -15   5   6    8.04    1.34
  15   5  -6    8.80    1.05
  15   5  -6    6.35    1.94
  15   5  -6    6.38    2.09
 -13  -5   6   -2.19    1.55
  13  -5  -6    2.08    1.13
  13   5  -6    4.59    1.70
 -13   5   6    1.66    1.03
  13   5  -6    2.18    1.08
  13   5  -6    0.39    1.78
 -11  -5   6   -1.32    1.79
  11  -5  -6    1.20    0.99
 -11   5   6    1.80    0.82
  11   5  -6    1.21    1.54
  11   5  -6    1.43    1.17
  11   5  -6    2.62    1.80
  -9  -5   6    3.09    1.88
   9  -5  -6   -0.17    0.87
   9   5  -6   -0.36    1.24
   9   5  -6    2.91    1.61
   9   5  -6    0.33    1.50
   7  -5  -6    3.12    0.94
   7  -5  -6    3.61    0.99
  -7  -5   6    0.90    1.87
   7   5  -6    4.71    1.71
   7   5  -6    4.50    1.66
   7   5  -6    3.79    1.37
  -5  -5   6   16.85    2.41
   5  -5  -6   17.48    1.48
   5   5  -6   16.85    2.40
   5   5  -6   16.72    2.01
   5   5  -6   14.91    1.78
   5   5  -6   14.11    2.05
   3  -5  -6    1.05    0.90
  -3  -5   6    2.02    2.12
   3   5  -6    1.06    1.46
   3   5  -6    0.78    1.70
   3   5  -6    0.67    1.38
   3   5  -6    0.11    1.56
   1  -5  -6   49.85    2.16
  -1  -5   6   47.35    3.60
   1  -5  -6   46.72    1.50
   1   5  -6   51.73    3.22
   1   5  -6   46.64    3.05
   1  -5   6    5.78    2.23
  -1  -5  -6    6.08    1.05
  -1  -5  -6    5.60    1.17
  -1   5  -6    7.54    1.95
  -1   5  -6    4.52    1.66
   3  -5   6   45.91    3.96
  -3  -5  -6   49.71    2.27
  -3  -5  -6   51.50    2.54
  -3   5  -6   51.04    3.45
  -3   5  -6   46.24    3.06
   5  -5   6   10.47    2.43
   5  -5   6   13.36    2.70
  -5  -5  -6    9.04    1.54
  -5  -5  -6    9.25    1.50
  -5   5  -6    9.04    1.95
  -5   5  -6   10.99    2.25
  -7  -5  -6   47.10    2.62
   7  -5   6   51.74    3.95
  -7  -5  -6   54.15    2.96
   7  -5   6   53.30    3.90
  -7   5  -6   54.76    3.52
  -7   5  -6   56.00    3.65
  -9  -5  -6   22.40    2.65
  -9  -5  -6   28.44    2.63
   9  -5   6   18.30    2.74
   9  -5   6   23.96    3.38
  -9   5  -6   27.05    3.42
  -9   5  -6   18.71    2.60
  11  -5   6    1.70    2.52
  11  -5   6   -0.41    2.38
 -11  -5  -6   -2.04    1.64
 -11  -5  -6    1.91    1.69
 -11   5  -6    0.40    1.84
 -11   5  -6   -2.51    2.11
  13  -5   6    6.59    2.68
 -13  -5  -6    4.92    2.11
 -13  -5  -6   12.35    2.41
  13  -5   6   10.44    2.72
 -13   5  -6    5.08    2.65
 -13   5  -6    6.79    2.13
 -15  -5  -6   -0.18    1.94
 -15  -5  -6   -2.18    2.05
  15  -5   6   -1.59    2.70
  15  -5   6   -4.80    2.51
 -15   5  -6   -5.23    2.19
 -15   5  -6    2.39    2.23
  17  -5   6    2.18    2.65
  17  -5   6    0.87    2.61
 -17  -5  -6    0.42    2.34
 -17  -5  -6    2.85    2.34
 -17   5  -6    3.28    2.45
 -17   5  -6    1.97    2.32
 -19  -5  -6   13.35    2.97
 -19  -5  -6   18.81    3.05
  19  -5   6   11.30    3.42
 -19   5  -6    9.34    2.88
 -19   5  -6   15.41    3.04
  21  -5   6   13.19    3.61
 -21  -5  -6   15.15    3.17
 -21  -5  -6   20.44    3.39
 -21   5  -6   11.58    3.14
 -21   5  -6   21.40    3.50
  23  -5   6   -1.80    2.83
 -23  -5  -6   -0.16    2.50
 -23  -5  -6   -0.89    2.57
 -23   5  -6   -2.22    2.50
 -23   5  -6   -3.07    2.45
 -25  -5  -6    5.36    3.14
  25  -5   6    6.52    3.32
 -25  -5  -6    8.66    3.14
 -25   5  -6    7.85    3.41
 -25   5  -6    4.92    3.10
 -27  -5  -6    0.35    2.88
 -27  -5  -6    1.41    2.95
  27  -5   6    1.59    3.15
 -27   5  -6   -1.77    2.87
 -27   5  -6    5.01    3.19
  29  -5   6    3.39    3.47
 -29  -5  -6    1.51    3.25
 -29  -5  -6    0.71    3.11
 -29   5  -6    2.40    3.47
 -29   5  -6    1.33    3.16
 -31  -5  -6    0.19    3.32
  31  -5   6   -0.57    3.51
 -31  -5  -6   -2.87    3.03
 -31   5  -6   -0.51    3.40
 -31   5  -6    5.31    3.54
 -33  -5  -6    3.48    3.55
 -33   5  -6    7.59    3.70
 -40  -6   6   11.28    4.04
 -40   6   6    2.58    3.08
 -40   6   6    7.70    3.26
  40   6  -6   14.23    4.20
 -38  -6   6   -0.03    3.34
 -38   6   6    4.50    2.94
  38   6  -6   -0.31    3.17
 -38   6   6    1.92    2.87
 -36  -6   6    3.24    3.39
 -36   6   6   -1.03    2.57
  36   6  -6   -0.06    3.10
 -36   6   6    0.57    2.83
  36   6  -6    2.23    3.08
 -34  -6   6   -1.21    3.11
 -34   6   6    2.22    2.57
 -34   6   6   -0.96    2.59
  34   6  -6   -0.97    2.95
  34   6  -6    3.66    3.29
 -32  -6   6    9.15    3.44
 -32   6   6   12.40    2.89
 -32   6   6   11.38    2.96
  32   6  -6    9.03    3.44
  32   6  -6    9.88    3.15
 -30  -6   6    9.24    3.05
  30   6  -6    1.59    2.66
  30   6  -6    9.89    3.61
 -30   6   6    7.90    2.67
 -30   6   6   11.40    2.76
 -28  -6   6   15.23    3.46
 -28   6   6   14.23    2.71
  28   6  -6   12.01    3.52
  28   6  -6   15.51    3.36
 -26  -6   6   25.20    3.67
  26   6  -6   28.08    4.02
 -26   6   6   24.10    3.20
  26   6  -6   27.52    4.16
 -24   6   6    1.00    1.86
  24   6  -6    2.85    2.54
  24   6  -6    0.68    2.97
  22   6  -6   22.37    3.66
 -22   6   6   30.85    2.78
  22   6  -6   28.05    3.72
 -20  -6   6    4.70    1.82
 -20   6   6    6.08    1.77
  20   6  -6    7.17    2.35
  20   6  -6    6.59    2.91
 -18  -6   6    8.22    2.00
  18   6  -6    8.71    3.02
 -18   6   6   11.04    1.75
  18   6  -6   10.91    2.55
 -16  -6   6    8.76    2.05
  16   6  -6    6.93    2.19
  16   6  -6    8.61    3.17
 -16   6   6    6.01    1.38
 -14  -6   6    3.29    1.96
  14   6  -6    2.06    1.76
  14   6  -6    0.58    1.69
 -14   6   6    1.84    1.16
 -12  -6   6    2.00    1.92
 -12   6   6    4.99    1.07
  12   6  -6    2.83    1.77
  12   6  -6    1.17    1.86
 -10  -6   6   53.10    3.64
 -10   6   6   55.74    1.76
  10   6  -6   61.93    3.38
  10   6  -6   61.45    3.51
  10   6  -6   56.01    2.01
  -8  -6   6   19.27    2.67
   8   6  -6   18.92    2.67
   8   6  -6   14.21    1.88
   8   6  -6   19.40    2.31
  -6  -6   6   42.37    3.37
   6   6  -6   48.30    2.87
   6   6  -6   43.28    2.49
   6   6  -6   44.46    3.09
  -4  -6   6   10.53    2.56
   4  -6  -6   10.50    1.14
   4   6  -6    9.20    2.11
   4   6  -6   13.66    1.94
   4   6  -6   14.76    1.78
   4   6  -6   12.96    2.05
  -2  -6   6  109.43    5.16
   2  -6  -6  104.94    2.67
   2   6  -6  102.67    4.49
   2   6  -6  112.36    4.26
   2   6  -6   97.94    3.86
   2   6  -6  105.40    3.67
   0  -6  -6   76.23    2.32
   0  -6   6   82.56    4.47
   0  -6  -6   78.75    2.47
   0   6  -6   84.49    3.77
   0   6  -6   74.19    4.16
   2  -6   6   22.69    3.27
   2  -6   6   28.10    3.43
  -2  -6  -6   21.50    1.83
  -2  -6  -6   27.17    1.86
  -2   6  -6   23.91    2.58
  -2   6  -6   17.76    2.56
   4  -6   6   39.02    3.80
  -4  -6  -6   39.11    2.37
   4  -6   6   38.07    3.32
  -4  -6  -6   39.81    2.36
  -4   6  -6   35.20    2.96
  -4   6  -6   42.30    3.38
   6  -6   6   -0.33    2.24
   6  -6   6   -0.89    2.31
  -6  -6  -6   -0.20    1.27
  -6  -6  -6   -0.04    1.32
  -6   6  -6    1.39    1.99
  -6   6  -6   -0.76    1.65
   8  -6   6   41.24    4.00
  -8  -6  -6   39.93    2.75
  -8  -6  -6   45.91    2.84
   8  -6   6   41.71    4.13
  -8   6  -6   41.44    3.64
  -8   6  -6   40.83    3.32
  10  -6   6    4.56    2.66
 -10  -6  -6    7.83    1.89
 -10  -6  -6    4.78    1.76
  10  -6   6    3.45    2.78
 -10   6  -6    4.01    2.46
 -10   6  -6   10.61    2.28
  12  -6   6    7.24    3.07
 -12  -6  -6    5.95    2.03
 -12  -6  -6    0.99    1.88
  12  -6   6    3.50    2.87
 -12   6  -6    2.55    2.53
 -12   6  -6    2.31    2.17
  14  -6   6    3.98    2.75
 -14  -6  -6    5.06    2.22
 -14  -6  -6    4.66    2.08
  14  -6   6    3.30    2.85
 -14   6  -6    1.16    2.11
 -14   6  -6    6.91    2.83
  16  -6   6   18.30    3.56
 -16  -6  -6   16.31    2.83
 -16  -6  -6   17.38    2.83
  16  -6   6   13.46    3.36
 -16   6  -6   20.70    3.11
 -16   6  -6   19.73    3.54
 -18  -6  -6    2.72    2.36
 -18  -6  -6   -3.38    2.18
  18  -6   6   -1.56    2.95
  18  -6   6   -1.99    2.99
 -18   6  -6    1.73    2.44
 -18   6  -6    2.56    2.82
  20  -6   6   33.45    4.13
 -20  -6  -6   32.60    3.89
 -20  -6  -6   25.77    3.71
  20  -6   6   32.70    4.78
 -20   6  -6   29.00    3.79
 -20   6  -6   33.63    4.52
  22  -6   6   -2.39    3.00
 -22  -6  -6    0.00    2.50
 -22  -6  -6    7.03    2.74
  22  -6   6   -1.31    2.83
 -22   6  -6   -0.70    2.92
 -22   6  -6    3.51    2.73
 -24  -6  -6   11.69    3.32
  24  -6   6   15.77    3.93
 -24  -6  -6    6.60    2.98
 -24   6  -6    6.14    3.43
 -24   6  -6    8.99    3.03
  26  -6   6    2.50    3.41
 -26  -6  -6    7.28    3.31
 -26  -6  -6    2.99    3.01
 -26   6  -6    2.76    3.00
 -26   6  -6    3.54    3.45
 -28  -6  -6    2.97    3.25
 -28  -6  -6    4.22    3.23
  28  -6   6    2.73    3.64
 -28   6  -6    4.27    3.29
 -28   6  -6    3.43    3.56
 -30  -6  -6    3.47    3.43
 -30  -6  -6    4.59    3.68
  30  -6   6   -0.66    3.55
 -30   6  -6    6.59    3.23
 -30   6  -6    0.81    3.49
 -39  -7   6   10.98    4.14
  39   7  -6   18.00    4.32
 -37  -7   6   -1.23    3.41
  37   7  -6    2.64    3.46
  37   7  -6    3.18    3.12
 -35  -7   6   34.13    4.66
  35   7  -6   20.94    4.21
  35   7  -6   18.44    4.19
 -33  -7   6   -0.35    3.20
  33   7  -6    6.20    3.21
  33   7  -6    3.84    3.57
 -31  -7   6    5.84    3.06
  31   7  -6    1.30    3.39
  31   7  -6    6.28    3.10
 -29  -7   6   13.78    3.55
  29   7  -6   11.24    3.23
  29   7  -6   13.86    3.76
 -27  -7   6    2.48    2.69
  27   7  -6    3.56    2.54
  27   7  -6    4.35    3.28
  25   7  -6    0.55    2.57
  25   7  -6    3.39    2.87
  23   7  -6   10.34    2.71
  23   7  -6    6.77    3.34
  21   7  -6    1.24    2.38
  21   7  -6    5.63    3.16
  19   7  -6   28.41    3.59
  19   7  -6   23.51    3.80
 -17  -7   6   18.30    2.53
  17   7  -6   16.88    2.80
  17   7  -6   16.06    3.42
 -15  -7   6   60.10    3.84
  15   7  -6   56.03    5.22
  15   7  -6   73.34    4.09
 -13  -7   6   59.11    3.74
  13   7  -6   60.19    3.63
  13   7  -6   59.88    3.94
  13   7  -6   60.30    4.86
 -11  -7   6   11.55    2.64
  11   7  -6   10.26    3.12
  11   7  -6    7.37    2.00
  11   7  -6   12.48    2.43
  -9  -7   6   26.42    3.37
   9   7  -6   30.34    3.18
   9   7  -6   26.96    2.76
  -7  -7   6   13.39    2.74
   7   7  -6    9.78    2.09
   7   7  -6   13.84    2.06
  -5  -7   6   11.12    2.76
   5   7  -6    7.96    1.86
   5   7  -6    7.69    2.03
  -3  -7   6    2.98    2.53
   3   7  -6   -0.01    2.03
   3   7  -6    2.14    1.77
   3   7  -6    2.84    1.64
  -1  -7   6   -0.91    2.21
   1   7  -6   -1.56    1.42
   1   7  -6    0.93    1.71
   1   7  -6   -1.85    1.99
   1  -7   6    0.08    2.53
  -1   7  -6    1.00    1.71
  -1   7  -6    0.97    2.07
  -1   7  -6    0.72    1.69
   3  -7   6   25.56    3.60
  -3   7  -6   27.04    3.56
  -3   7  -6   33.39    3.01
   5  -7   6    4.56    2.67
  -5   7  -6    6.52    2.08
  -5   7  -6    6.78    2.54
   7  -7   6   24.11    3.58
  -7   7  -6   17.68    2.60
  -7   7  -6   20.39    3.15
   9  -7   6    3.24    2.80
  -9   7  -6    1.62    1.91
  -9   7  -6    0.82    2.40
  11  -7   6   66.48    5.08
 -11   7  -6   61.83    4.44
 -11   7  -6   67.51    4.12
  13  -7   6   54.76    5.31
 -13   7  -6   58.67    4.14
 -13   7  -6   59.78    4.47
  15  -7   6   -3.46    3.02
 -15   7  -6   -0.24    2.61
 -15   7  -6    0.86    2.22
  17  -7   6   10.49    3.53
 -17   7  -6    7.60    2.82
 -17   7  -6    3.08    2.53
  19  -7   6   12.63    3.92
  19  -7   6   25.17    4.14
 -19   7  -6   21.32    3.83
 -19   7  -6   23.35    3.41
  21  -7   6    2.23    3.15
  21  -7   6    0.10    3.35
 -21   7  -6    0.56    2.68
 -21   7  -6    1.59    2.71
  23  -7   6    2.05    3.43
  23  -7   6   -0.41    3.42
 -23   7  -6   -1.72    2.71
 -23   7  -6    1.11    2.67
  25  -7   6    0.35    3.47
 -25   7  -6    4.29    3.53
 -25   7  -6    7.78    3.21
  27  -7   6   13.85    4.25
 -27   7  -6   21.54    3.98
 -27   7  -6   16.98    4.26
  29  -7   6    5.42    4.02
 -29   7  -6   -3.43    2.96
 -29   7  -6   10.59    4.02
 -36  -8   6    2.50    3.68
  36   8  -6   -1.66    3.48
  36   8  -6    0.02    3.21
 -34  -8   6   11.16    3.95
  34   8  -6   14.76    4.20
  34   8  -6   11.64    3.83
 -32  -8   6   13.15    3.87
  32   8  -6   16.38    3.70
  32   8  -6    9.42    4.02
 -30  -8   6    7.10    3.50
  30   8  -6    5.66    2.82
  30   8  -6    2.91    3.34
 -28  -8   6   34.21    4.37
  28   8  -6   30.39    4.57
  28   8  -6   28.83    4.12
 -26  -8   6   48.95    4.87
  26   8  -6   48.03    4.56
  26   8  -6   43.53    4.94
  24   8  -6   -3.79    2.77
  24   8  -6    2.02    2.56
  22   8  -6   48.74    4.26
  22   8  -6   45.99    5.21
  20   8  -6   22.10    3.85
  20   8  -6   17.07    3.09
  18   8  -6    2.23    3.19
  18   8  -6   -0.09    2.19
 -16  -8   6    4.68    2.28
  16   8  -6    1.06    2.10
  16   8  -6    2.24    3.19
 -14  -8   6   34.14    3.70
  14   8  -6   24.23    4.12
  14   8  -6   28.89    3.42
 -12  -8   6    2.05    2.31
  12   8  -6    2.78    1.98
  12   8  -6   -1.37    2.97
  12   8  -6   -2.35    1.67
 -10  -8   6    6.11    2.52
  10   8  -6    1.66    2.04
  10   8  -6    3.45    3.12
  10   8  -6    4.26    1.81
  -8  -8   6   71.74    4.69
   8   8  -6   60.85    4.95
   8   8  -6   70.63    3.74
   8   8  -6   66.39    3.61
  -6  -8   6   71.10    4.83
   6   8  -6   72.07    3.89
   6   8  -6   70.20    3.52
   6   8  -6   73.67    5.10
  -4  -8   6   -4.93    2.48
   4   8  -6    0.31    1.81
   4   8  -6    1.78    1.65
   4   8  -6   -2.17    2.92
  -2  -8   6   75.17    4.84
   2   8  -6   70.51    4.55
   2   8  -6   78.83    3.94
   2   8  -6   73.26    3.59
   2   8  -6   80.18    5.47
   0  -8   6  121.69    6.16
   0   8  -6  114.38    5.41
   0   8  -6  126.87    4.56
   0   8  -6  126.50    4.73
   0   8  -6  119.29    6.15
   2  -8   6    3.95    2.96
  -2   8  -6    2.10    1.79
  -2   8  -6    2.98    1.91
  -2   8  -6    4.80    2.50
   4  -8   6   52.20    4.62
  -4   8  -6   48.24    3.35
  -4   8  -6   45.67    4.13
   6  -8   6   14.47    3.45
  -6   8  -6   14.45    3.01
  -6   8  -6   13.81    2.37
   8  -8   6   -1.80    3.03
  -8   8  -6   -0.92    2.42
  -8   8  -6   -5.35    2.53
  -8   8  -6    0.50    1.95
  10  -8   6    5.95    3.34
 -10   8  -6    5.80    2.82
 -10   8  -6    5.48    2.14
  12  -8   6   15.96    3.72
 -12   8  -6   14.89    3.30
 -12   8  -6   26.66    3.28
  14  -8   6    5.27    3.49
 -14   8  -6   10.63    2.63
 -14   8  -6    5.48    3.00
  16  -8   6    8.00    3.49
 -16   8  -6   -1.99    2.78
 -16   8  -6    4.07    2.43
  18  -8   6   -2.34    3.32
 -18   8  -6    2.46    2.54
 -18   8  -6    3.22    3.10
  20  -8   6   47.91    5.31
 -20   8  -6   54.60    4.61
 -20   8  -6   53.16    4.89
  22  -8   6    0.33    3.38
 -22   8  -6   -2.55    3.09
 -22   8  -6    0.08    2.74
  24  -8   6   16.51    4.28
 -24   8  -6   21.10    4.18
 -24   8  -6   16.82    3.70
  26  -8   6   29.37    5.10
 -26   8  -6   26.45    4.22
 -26   8  -6   31.80    4.86
 -35  -9   6    6.62    3.92
  35   9  -6    8.99    3.67
  35   9  -6    5.87    4.06
 -33  -9   6   20.45    4.30
  33   9  -6   14.99    4.13
  33   9  -6   14.54    3.90
 -31  -9   6    3.11    3.27
  31   9  -6    5.57    3.67
  31   9  -6   -1.82    2.84
 -29  -9   6   12.12    3.83
  29   9  -6   14.30    4.11
  29   9  -6   16.14    3.57
 -27  -9   6   41.12    4.97
  27   9  -6   36.59    4.37
  27   9  -6   46.67    5.76
  25   9  -6    7.23    2.80
  25   9  -6   11.99    3.81
  23   9  -6    3.91    2.71
  23   9  -6   -0.18    3.48
  21   9  -6   49.85    5.49
  21   9  -6   52.22    4.59
  19   9  -6   40.94    4.13
  19   9  -6   44.37    5.26
  17   9  -6   14.32    2.84
  17   9  -6   17.16    3.99
  15   9  -6   32.73    4.44
  15   9  -6   33.69    3.76
 -13  -9   6   40.36    3.93
  13   9  -6   39.39    4.98
  13   9  -6   51.04    3.62
 -11  -9   6   -0.64    2.46
  11   9  -6   -0.50    3.07
  11   9  -6   -2.60    1.94
  -9  -9   6   15.83    3.21
   9   9  -6   14.99    3.72
   9   9  -6   20.42    2.71
  -7  -9   6   23.41    3.60
   7   9  -6   22.63    2.85
   7   9  -6   25.33    4.18
  -5  -9   6   16.63    3.50
   5   9  -6   21.89    4.00
  -3  -9   6    2.86    2.78
   3   9  -6    5.75    3.22
  -1  -9   6   53.38    5.04
   1   9  -6   53.80    5.08
   1  -9   6   28.19    4.11
  -1   9  -6   23.17    3.82
  -1   9  -6   26.68    3.51
   3  -9   6    1.87    3.10
  -3   9  -6    7.95    2.60
  -3   9  -6    3.48    2.87
   5  -9   6   29.39    4.35
  -5   9  -6   36.75    4.58
  -5   9  -6   22.55    3.45
   7  -9   6   57.58    5.10
  -7   9  -6   49.53    4.57
  -7   9  -6   57.62    4.85
   9  -9   6    0.28    3.08
  -9   9  -6    2.60    2.62
  11  -9   6   22.64    4.18
 -11   9  -6   20.77    3.57
  13  -9   6   51.31    5.25
 -13   9  -6   58.73    4.70
  15  -9   6    5.86    3.73
 -15   9  -6    4.38    3.09
  17  -9   6    7.94    3.70
 -17   9  -6   12.59    3.48
  19  -9   6   58.98    6.21
 -19   9  -6   46.64    5.08
  21  -9   6    7.78    3.94
 -21   9  -6   10.71    3.83
  23  -9   6    0.15    3.85
 -23   9  -6   -2.37    3.00
  25  -9   6    4.71    4.20
 -25   9  -6   10.73    3.89
 -32 -10   6    3.05    3.68
  32  10  -6    6.72    4.19
 -30 -10   6   -0.92    3.43
  30  10  -6   -0.35    3.44
 -28 -10   6   18.71    4.16
  28  10  -6   19.70    4.92
 -26 -10   6   23.97    4.29
  26  10  -6   29.89    5.26
  24  10  -6    7.04    3.99
  22  10  -6   11.26    4.36
  20  10  -6   52.99    5.99
  18  10  -6   30.54    4.64
  16  10  -6    3.99    3.43
  14  10  -6   67.01    5.89
 -12 -10   6   41.35    4.23
  12  10  -6   31.01    4.66
 -10 -10   6    2.24    2.87
  10  10  -6    4.55    3.14
  -8 -10   6   53.04    4.86
   8  10  -6   58.64    5.51
  -6 -10   6   36.68    4.61
   6  10  -6   31.66    4.50
  -4 -10   6   13.99    3.37
   4  10  -6   11.18    3.60
  -2 -10   6    9.17    3.50
   2  10  -6    7.25    3.14
   0 -10   6   41.64    4.67
   0  10  -6   42.23    4.73
   2 -10   6    7.15    3.59
  -2  10  -6    6.39    3.27
  -2  10  -6   10.10    2.98
   4 -10   6    1.72    2.99
  -4  10  -6    2.09    2.67
  -4  10  -6   -1.28    2.44
   6 -10   6   34.78    4.89
  -6  10  -6   35.93    4.63
  -6  10  -6   40.12    4.37
   8 -10   6   25.68    4.46
  -8  10  -6   34.71    4.28
  10 -10   6   -3.16    3.15
 -10  10  -6    2.08    2.81
  12 -10   6   62.95    6.31
 -12  10  -6   82.02    5.56
  14 -10   6   22.30    4.55
 -14  10  -6   26.26    4.07
  16 -10   6   -2.01    3.60
 -16  10  -6    4.51    3.20
  18 -10   6   25.37    5.03
 -18  10  -6   28.19    4.40
  20 -10   6    0.02    3.65
 -20  10  -6    7.22    3.67
  22 -10   6    1.36    3.84
 -22  10  -6    4.46    3.50
 -27 -11   6   50.95    5.52
  27  11  -6   45.64    6.27
 -25 -11   6   21.62    4.11
  25  11  -6   11.32    4.53
  23  11  -6   -4.70    3.42
  21  11  -6   54.15    6.32
  19  11  -6   17.47    4.32
  17  11  -6   27.60    4.71
  15  11  -6   10.58    3.95
  13  11  -6   13.64    4.19
  11  11  -6   14.06    3.97
  -9 -11   6    0.76    3.05
   9  11  -6    1.81    3.44
  -7 -11   6   56.91    5.29
   7  11  -6   63.25    5.81
  -5 -11   6   23.91    4.19
   5  11  -6   25.96    4.39
  -3 -11   6    1.48    3.40
   3  11  -6    2.21    3.26
  -1 -11   6   58.86    5.72
   1  11  -6   63.29    5.53
   1 -11   6   16.76    4.17
  -1  11  -6   20.62    3.87
   3 -11   6    0.79    3.26
  -3  11  -6    8.62    3.22
   5 -11   6   20.24    4.48
  -5  11  -6   20.59    3.73
   7 -11   6   17.61    4.44
  -7  11  -6   16.69    3.60
   9 -11   6   -1.33    3.72
  -9  11  -6   -0.70    2.79
  11 -11   6    4.72    3.65
 -11  11  -6   -4.01    2.64
  13 -11   6   15.38    4.68
 -13  11  -6   24.36    4.09
  15 -11   6   15.77    4.78
 -15  11  -6   20.82    4.12
  17 -11   6   -1.54    3.93
 -17  11  -6    4.49    3.29
  22  12  -6    3.07    3.89
  20  12  -6   28.41    5.21
  18  12  -6   36.63    5.35
  16  12  -6    6.23    3.73
  14  12  -6   39.42    5.78
  12  12  -6   26.95    4.80
  10  12  -6   10.31    3.86
   8  12  -6   35.15    5.25
  -6 -12   6    5.12    3.65
   6  12  -6   14.74    4.21
  -4 -12   6    1.59    3.49
   4  12  -6    2.00    3.53
  -2 -12   6    2.92    3.69
   2  12  -6    2.56    3.51
   0 -12   6   10.62    4.13
   0  12  -6   15.52    3.93
   2 -12   6    8.99    4.23
  -2  12  -6   10.48    3.68
   4 -12   6    3.01    3.94
   6 -12   6   47.52    5.70
  -6  12  -6   44.64    4.77
   8 -12   6   43.52    6.02
  -8  12  -6   49.18    5.00
  10 -12   6    0.18    4.08
 -10  12  -6   -0.71    3.14
  12 -12   6   41.51    5.84
 -12  12  -6   52.13    5.28
  15 -13  -6    6.66    3.82
  15  13  -6   10.16    4.54
  13 -13  -6   11.42    4.22
  13  13  -6   11.44    4.59
  11 -13  -6    9.88    4.03
  11  13  -6    3.71    4.05
   9 -13  -6    1.52    3.65
   9  13  -6    3.87    3.96
   7  13  -6   25.36    5.00
   5  13  -6   20.38    4.69
  -3 -13   6   -2.03    3.59
   3  13  -6   11.61    4.01
  -1 -13   6   36.17    5.56
   1  13  -6   39.71    5.44
   1 -13   6   23.25    4.98
   3 -13   6   -2.33    3.92
   5 -13   6   12.89    4.64
 -46   0   7   -5.38    2.98
  46   0  -7   -1.56    2.85
  44   0  -7   -3.82    3.25
  44   0  -7    6.48    2.97
 -44   0   7    4.23    3.40
  42   0  -7    2.73    2.79
  42   0  -7   -1.49    2.96
 -42   0   7   -3.82    2.99
  40   0  -7    1.68    3.38
  40   0  -7   -3.29    2.60
 -40   0   7    7.77    3.37
  38   0  -7    3.25    3.17
 -38   0   7   -1.17    2.82
  38   0  -7    2.39    2.61
 -36   0   7   -0.73    2.75
  36   0  -7    2.77    2.59
  36   0  -7    0.00    2.95
 -34   0   7    0.83    2.30
  34   0  -7   -4.10    2.20
  34   0  -7    0.14    2.56
  32   0  -7   -0.90    2.31
 -32   0   7    2.01    2.36
  32   0  -7    1.89    2.44
 -30   0   7   -1.33    2.04
  30   0  -7    0.91    2.31
  30   0  -7    2.92    2.27
 -28   0   7    1.39    2.16
  28   0  -7    4.37    2.55
  26   0  -7   -2.35    2.16
 -26   0   7    1.36    1.87
 -24   0   7   -0.20    1.83
  24   0  -7   -4.63    1.91
  22   0  -7    0.52    1.82
 -22   0   7    0.55    1.76
  20   0  -7   -1.12    1.70
 -20   0   7   -0.91    1.60
 -18   0   7   -0.98    1.57
  18   0  -7   -0.48    1.64
  16   0  -7    1.27    1.66
  16   0  -7    4.14    1.94
  14   0  -7   -1.83    1.47
  14   0  -7   -0.35    1.73
  12   0  -7   -0.08    1.66
  12   0  -7    1.48    1.57
  10   0  -7   -1.98    1.41
  10   0  -7    0.38    1.42
  -8   0   7    0.94    1.54
   8   0  -7   -0.95    1.40
   8   0  -7    0.40    1.54
   6   0  -7    1.82    1.54
   6   0  -7   -1.31    1.33
  -6   0   7    1.57    1.66
   4   0  -7    1.83    1.30
  -4   0   7    0.87    1.50
   4   0  -7   -0.64    1.40
   2   0  -7    0.70    1.34
  -2   0   7   -0.35    1.61
   2   0  -7    1.04    1.38
   0   0   7    2.32    1.59
   0   0  -7    0.54    1.39
   0   0  -7   -1.43    1.52
   2   0   7    3.78    1.68
  -2   0  -7    0.57    1.50
  -2   0  -7    1.36    1.64
   4   0   7    0.94    1.70
  -4   0  -7   -0.31    1.58
  -4   0  -7   -0.32    1.64
  -6   0  -7   -1.56    1.62
   6   0   7   -2.56    1.55
  -6   0  -7    2.31    1.64
   8   0   7    0.92    1.73
  -8   0  -7    1.41    1.62
  -8   0  -7    0.76    1.62
[truncated: 466,700 more chars]
